# Supplementary material
Source: publisher site journal article supplement (https://www.spandidos-publications.com/4349/downloadSupplementary)
Supplement: Supplementary file 1 [file downloadSupplementary]

## Sheet: GO_siTRAP1 05%O2 vs siNEG 05%O2
Table SIII. Functional enriched categories.
row.names	ID	Description	setSize	enrichmentScore	NES	P-value	Q-value	rank	leading_edge	core_enrichment
GO_POSITIVE_REGULATION_OF_TRANSCRIPTION_FROM_RNA_POLYMERASE_II_PROMOTER_IN_RESPONSE_TO_ENDOPLASMIC_RETICULUM_STRESS	GO_POSITIVE_REGULATION_OF_TRANSCRIPTION_FROM_RNA_POLYMERASE_II_PROMOTER_IN_RESPONSE_TO_ENDOPLASMIC_RETICULUM_STRESS	GO_POSITIVE_REGULATION_OF_TRANSCRIPTION_FROM_RNA_POLYMERASE_II_PROMOTER_IN_RESPONSE_TO_ENDOPLASMIC_RETICULUM_STRESS	10	-0.878945	-2.07665	0.00245098	0.273844	142	tags=50%, list=1%, signal=50%	ATF6B/HSPA5/ATF4/ATF3/DDIT3
GO_PERK_MEDIATED_UNFOLDED_PROTEIN_RESPONSE	GO_PERK_MEDIATED_UNFOLDED_PROTEIN_RESPONSE	GO_PERK_MEDIATED_UNFOLDED_PROTEIN_RESPONSE	20	-0.790553	-2.20322	0.00271003	0.273844	139	tags=45%, list=1%, signal=45%	HSPA5/PTPN2/ATF4/ASNS/PPP1R15A/ATF3/CXCL8/DDIT3/HERPUD1
GO_LOCOMOTION_INVOLVED_IN_LOCOMOTORY_BEHAVIOR	GO_LOCOMOTION_INVOLVED_IN_LOCOMOTORY_BEHAVIOR	GO_LOCOMOTION_INVOLVED_IN_LOCOMOTORY_BEHAVIOR	11	-0.788221	-1.92012	0.00239808	0.273844	9	tags=27%, list=0%, signal=27%	MYO5A/DRD3/ARRDC3
GO_ATF6_MEDIATED_UNFOLDED_PROTEIN_RESPONSE	GO_ATF6_MEDIATED_UNFOLDED_PROTEIN_RESPONSE	GO_ATF6_MEDIATED_UNFOLDED_PROTEIN_RESPONSE	10	-0.78352	-1.8512	0.00490196	0.303856	425	tags=40%, list=2%, signal=39%	XBP1/ATF6B/HSPA5/DDIT3
GO_REGULATION_OF_TYPE_B_PANCREATIC_CELL_PROLIFERATION	GO_REGULATION_OF_TYPE_B_PANCREATIC_CELL_PROLIFERATION	GO_REGULATION_OF_TYPE_B_PANCREATIC_CELL_PROLIFERATION	13	-0.776319	-1.99143	0.00242718	0.273844	859	tags=31%, list=4%, signal=29%	MEN1/NR1D1/NR4A3/NR4A1
GO_REGULATION_OF_TRANSLATIONAL_INITIATION_IN_RESPONSE_TO_STRESS	GO_REGULATION_OF_TRANSLATIONAL_INITIATION_IN_RESPONSE_TO_STRESS	GO_REGULATION_OF_TRANSLATIONAL_INITIATION_IN_RESPONSE_TO_STRESS	11	-0.765088	-1.86377	0.00239808	0.273844	1764	tags=55%, list=9%, signal=50%	EIF2AK3/NCK2/DNAJC3/EIF2AK2/ATF4/PPP1R15A
GO_NEGATIVE_REGULATION_OF_OLIGODENDROCYTE_DIFFERENTIATION	GO_NEGATIVE_REGULATION_OF_OLIGODENDROCYTE_DIFFERENTIATION	GO_NEGATIVE_REGULATION_OF_OLIGODENDROCYTE_DIFFERENTIATION	13	-0.759493	-1.94827	0.00242718	0.273844	417	tags=38%, list=2%, signal=38%	DUSP10/ID2/TMEM98/HES1/DRD3
GO_NEGATIVE_REGULATION_OF_TRANSCRIPTION_FROM_RNA_POLYMERASE_II_PROMOTER_IN_RESPONSE_TO_STRESS	GO_NEGATIVE_REGULATION_OF_TRANSCRIPTION_FROM_RNA_POLYMERASE_II_PROMOTER_IN_RESPONSE_TO_STRESS	GO_NEGATIVE_REGULATION_OF_TRANSCRIPTION_FROM_RNA_POLYMERASE_II_PROMOTER_IN_RESPONSE_TO_STRESS	10	-0.740905	-1.75051	0.00490196	0.303856	2060	tags=80%, list=11%, signal=71%	NCK1/HSPA1A/BAG3/NCK2/TMBIM6/JUN/CITED2/DNAJB1
GO_CELLULAR_RESPONSE_TO_MANGANESE_ION	GO_CELLULAR_RESPONSE_TO_MANGANESE_ION	GO_CELLULAR_RESPONSE_TO_MANGANESE_ION	11	-0.740458	-1.80377	0.00959233	0.333723	2628	tags=55%, list=14%, signal=47%	LRRK2/PRKN/SLFN14/EIF2AK3/HSPA5/ATF4
GO_REGULATION_OF_BILE_ACID_BIOSYNTHETIC_PROCESS	GO_REGULATION_OF_BILE_ACID_BIOSYNTHETIC_PROCESS	GO_REGULATION_OF_BILE_ACID_BIOSYNTHETIC_PROCESS	10	-0.730835	-1.72672	0.00735294	0.311553	757	tags=40%, list=4%, signal=38%	FGFR4/NR1D1/FGF19/STARD4
GO_NEGATIVE_REGULATION_OF_ENDOPLASMIC_RETICULUM_UNFOLDED_PROTEIN_RESPONSE	GO_NEGATIVE_REGULATION_OF_ENDOPLASMIC_RETICULUM_UNFOLDED_PROTEIN_RESPONSE	GO_NEGATIVE_REGULATION_OF_ENDOPLASMIC_RETICULUM_UNFOLDED_PROTEIN_RESPONSE	11	-0.72619	-1.76901	0.00959233	0.333723	142	tags=45%, list=1%, signal=45%	NCK2/ATF6B/HSPA5/DNAJB9/PPP1R15A
GO_REGULATION_OF_COENZYME_METABOLIC_PROCESS	GO_REGULATION_OF_COENZYME_METABOLIC_PROCESS	GO_REGULATION_OF_COENZYME_METABOLIC_PROCESS	12	-0.700904	-1.74666	0.0123153	0.351702	2072	tags=50%, list=11%, signal=45%	PDP2/SNCA/PDK4/PDK3/COQ3/GSTZ1
GO_REGULATION_OF_TRANSLATION_IN_RESPONSE_TO_STRESS	GO_REGULATION_OF_TRANSLATION_IN_RESPONSE_TO_STRESS	GO_REGULATION_OF_TRANSLATION_IN_RESPONSE_TO_STRESS	15	-0.70079	-1.84169	0.00255102	0.273844	1764	tags=53%, list=9%, signal=48%	RPS6KA3/EIF2AK3/SESN2/NCK2/DNAJC3/EIF2AK2/ATF4/PPP1R15A
GO_NETRIN_ACTIVATED_SIGNALING_PATHWAY	GO_NETRIN_ACTIVATED_SIGNALING_PATHWAY	GO_NETRIN_ACTIVATED_SIGNALING_PATHWAY	12	-0.699157	-1.74231	0.0123153	0.351702	1765	tags=42%, list=9%, signal=38%	SIAH1/NTN1/UNC5C/UNC5A/SIAH2
GO_NEGATIVE_REGULATION_OF_EXCITATORY_POSTSYNAPTIC_POTENTIAL	GO_NEGATIVE_REGULATION_OF_EXCITATORY_POSTSYNAPTIC_POTENTIAL	GO_NEGATIVE_REGULATION_OF_EXCITATORY_POSTSYNAPTIC_POTENTIAL	11	-0.693374	-1.68907	0.0119904	0.351702	2628	tags=45%, list=14%, signal=39%	LRRK2/MTMR2/CELF4/PTEN/EIF4A3
GO_NEGATIVE_REGULATION_OF_CELLULAR_RESPONSE_TO_DRUG	GO_NEGATIVE_REGULATION_OF_CELLULAR_RESPONSE_TO_DRUG	GO_NEGATIVE_REGULATION_OF_CELLULAR_RESPONSE_TO_DRUG	22	-0.689151	-1.97617	0.002849	0.273844	95	tags=32%, list=0%, signal=32%	RGS4/PDE8A/LRRK2/PALM/NR4A3/DRD3/TRAP1
GO_RESPONSE_TO_MANGANESE_ION	GO_RESPONSE_TO_MANGANESE_ION	GO_RESPONSE_TO_MANGANESE_ION	17	-0.682509	-1.84288	0.00271003	0.273844	3954	tags=65%, list=21%, signal=51%	TSPO/D2HGDH/ARG1/ADAM9/LRRK2/PRKN/SLFN14/EIF2AK3/HSPA5/ATF4/PTGS2
GO_CARBON_NITROGEN_LIGASE_ACTIVITY_WITH_GLUTAMINE_AS_AMIDO_N_DONOR	GO_CARBON_NITROGEN_LIGASE_ACTIVITY_WITH_GLUTAMINE_AS_AMIDO_N_DONOR	GO_CARBON_NITROGEN_LIGASE_ACTIVITY_WITH_GLUTAMINE_AS_AMIDO_N_DONOR	10	-0.680144	-1.60695	0.0269608	0.37805	3409	tags=60%, list=18%, signal=49%	GMPS/PFAS/GATC/CAD/GATB/ASNS
GO_POSITIVE_REGULATION_OF_ENDOPLASMIC_RETICULUM_STRESS_INDUCED_INTRINSIC_APOPTOTIC_SIGNALING_PATHWAY	GO_POSITIVE_REGULATION_OF_ENDOPLASMIC_RETICULUM_STRESS_INDUCED_INTRINSIC_APOPTOTIC_SIGNALING_PATHWAY	GO_POSITIVE_REGULATION_OF_ENDOPLASMIC_RETICULUM_STRESS_INDUCED_INTRINSIC_APOPTOTIC_SIGNALING_PATHWAY	11	-0.678091	-1.65184	0.0143885	0.356699	2925	tags=64%, list=15%, signal=54%	SERINC3/NCK1/SPOP/BCL2L11/NCK2/PTPN2/DDIT3
GO_INTRACILIARY_RETROGRADE_TRANSPORT	GO_INTRACILIARY_RETROGRADE_TRANSPORT	GO_INTRACILIARY_RETROGRADE_TRANSPORT	10	-0.677266	-1.60015	0.0294118	0.394159	972	tags=30%, list=5%, signal=28%	IFT122/DYNC2LI1/TCTEX1D2
GO_SMOOTH_MUSCLE_CELL_CHEMOTAXIS	GO_SMOOTH_MUSCLE_CELL_CHEMOTAXIS	GO_SMOOTH_MUSCLE_CELL_CHEMOTAXIS	10	-0.676376	-1.59805	0.0318627	0.399337	713	tags=60%, list=4%, signal=58%	PDGFRB/LPAR1/PARVA/AIF1/MDK/PDGFD
GO_REGULATION_OF_ADENYLATE_CYCLASE_ACTIVATING_G_PROTEIN_COUPLED_RECEPTOR_SIGNALING_PATHWAY	GO_REGULATION_OF_ADENYLATE_CYCLASE_ACTIVATING_G_PROTEIN_COUPLED_RECEPTOR_SIGNALING_PATHWAY	GO_REGULATION_OF_ADENYLATE_CYCLASE_ACTIVATING_G_PROTEIN_COUPLED_RECEPTOR_SIGNALING_PATHWAY	11	-0.666784	-1.6243	0.0263789	0.37805	120	tags=27%, list=1%, signal=27%	OPRL1/MRAP2/ARRDC3
GO_NEGATIVE_REGULATION_OF_NEURON_PROJECTION_REGENERATION	GO_NEGATIVE_REGULATION_OF_NEURON_PROJECTION_REGENERATION	GO_NEGATIVE_REGULATION_OF_NEURON_PROJECTION_REGENERATION	14	-0.666347	-1.73401	0.0100503	0.333723	1561	tags=50%, list=8%, signal=46%	TNR/PTPRS/RTN4RL1/INPP5F/SPP1/PTEN/KREMEN1
GO_MAP_KINASE_PHOSPHATASE_ACTIVITY	GO_MAP_KINASE_PHOSPHATASE_ACTIVITY	GO_MAP_KINASE_PHOSPHATASE_ACTIVITY	14	-0.663933	-1.72773	0.0100503	0.333723	2156	tags=36%, list=11%, signal=32%	DUSP7/DUSP8/DUSP10/DUSP1/DUSP16
GO_CAMP_RESPONSE_ELEMENT_BINDING	GO_CAMP_RESPONSE_ELEMENT_BINDING	GO_CAMP_RESPONSE_ELEMENT_BINDING	14	-0.662725	-1.72459	0.0100503	0.333723	664	tags=36%, list=3%, signal=35%	JUN/TCF12/ATF2/ATF6B/NR4A3
GO_MAINTENANCE_OF_PROTEIN_LOCALIZATION_IN_ENDOPLASMIC_RETICULUM	GO_MAINTENANCE_OF_PROTEIN_LOCALIZATION_IN_ENDOPLASMIC_RETICULUM	GO_MAINTENANCE_OF_PROTEIN_LOCALIZATION_IN_ENDOPLASMIC_RETICULUM	12	-0.662423	-1.65077	0.0246305	0.375568	1609	tags=33%, list=8%, signal=31%	KDELR3/GPAA1/HSPA5/INSIG1
GO_POSITIVE_REGULATION_OF_ISOTYPE_SWITCHING_TO_IGG_ISOTYPES	GO_POSITIVE_REGULATION_OF_ISOTYPE_SWITCHING_TO_IGG_ISOTYPES	GO_POSITIVE_REGULATION_OF_ISOTYPE_SWITCHING_TO_IGG_ISOTYPES	10	-0.660662	-1.56092	0.0490196	0.421511	2162	tags=50%, list=11%, signal=44%	CD40/ATAD5/TBX21/MSH2/CD28
GO_REGULATION_OF_ER_TO_GOLGI_VESICLE_MEDIATED_TRANSPORT	GO_REGULATION_OF_ER_TO_GOLGI_VESICLE_MEDIATED_TRANSPORT	GO_REGULATION_OF_ER_TO_GOLGI_VESICLE_MEDIATED_TRANSPORT	15	-0.65709	-1.72685	0.0127551	0.352816	2628	tags=53%, list=14%, signal=46%	PREB/LRRK2/SCFD1/GAS1/SAR1A/MAPK15/SORL1/INSIG1
GO_MHC_CLASS_II_PROTEIN_COMPLEX_BINDING	GO_MHC_CLASS_II_PROTEIN_COMPLEX_BINDING	GO_MHC_CLASS_II_PROTEIN_COMPLEX_BINDING	16	-0.6566	-1.7346	0.0135135	0.356699	2340	tags=44%, list=12%, signal=38%	ANXA11/HSP90AA1/HSPA8/ATP1B1/HLA-DRA/HLA-DMB/YWHAE
GO_DIHYDROLIPOYL_DEHYDROGENASE_COMPLEX	GO_DIHYDROLIPOYL_DEHYDROGENASE_COMPLEX	GO_DIHYDROLIPOYL_DEHYDROGENASE_COMPLEX	11	-0.655033	-1.59567	0.0359712	0.41257	1057	tags=36%, list=5%, signal=34%	DBT/BCKDHA/OGDHL/BCKDHB
GO_ER_NUCLEUS_SIGNALING_PATHWAY	GO_ER_NUCLEUS_SIGNALING_PATHWAY	GO_ER_NUCLEUS_SIGNALING_PATHWAY	43	-0.652773	-2.19061	0.00325733	0.273844	425	tags=28%, list=2%, signal=27%	XBP1/ATF6B/HSPA5/PTPN2/ATF4/INSIG1/ASNS/PPP1R15A/ATF3/CXCL8/DDIT3/HERPUD1
GO_TYPE_B_PANCREATIC_CELL_PROLIFERATION	GO_TYPE_B_PANCREATIC_CELL_PROLIFERATION	GO_TYPE_B_PANCREATIC_CELL_PROLIFERATION	21	-0.651915	-1.83042	0.00283286	0.273844	1117	tags=24%, list=6%, signal=22%	BAD/MEN1/NR1D1/NR4A3/NR4A1
GO_DOPAMINE_BIOSYNTHETIC_PROCESS	GO_DOPAMINE_BIOSYNTHETIC_PROCESS	GO_DOPAMINE_BIOSYNTHETIC_PROCESS	11	-0.650844	-1.58547	0.0359712	0.41257	1564	tags=18%, list=8%, signal=17%	SNCA/NR4A2
GO_OLIGOSACCHARIDE_CATABOLIC_PROCESS	GO_OLIGOSACCHARIDE_CATABOLIC_PROCESS	GO_OLIGOSACCHARIDE_CATABOLIC_PROCESS	11	-0.649398	-1.58195	0.0359712	0.41257	4245	tags=45%, list=22%, signal=35%	NEU3/NEU1/NEU2/MAN2C1/CTBS
GO_CENTROMERIC_SISTER_CHROMATID_COHESION	GO_CENTROMERIC_SISTER_CHROMATID_COHESION	GO_CENTROMERIC_SISTER_CHROMATID_COHESION	11	-0.648346	-1.57938	0.0359712	0.41257	1665	tags=55%, list=9%, signal=50%	BOD1/NAA10/BUB1B/CTCF/SGO2/SGO1
GO_TRICARBOXYLIC_ACID_CYCLE_ENZYME_COMPLEX	GO_TRICARBOXYLIC_ACID_CYCLE_ENZYME_COMPLEX	GO_TRICARBOXYLIC_ACID_CYCLE_ENZYME_COMPLEX	14	-0.64693	-1.68349	0.0100503	0.333723	3789	tags=50%, list=20%, signal=40%	SUCLG2/FH/DBT/BCKDHA/SUCLA2/OGDHL/BCKDHB
GO_REGULATION_OF_HEAT_GENERATION	GO_REGULATION_OF_HEAT_GENERATION	GO_REGULATION_OF_HEAT_GENERATION	13	-0.646899	-1.65944	0.0169903	0.356699	1398	tags=31%, list=7%, signal=29%	CNR1/TNFSF11/PTGS2/ARRDC3
GO_WNT_SIGNALOSOME	GO_WNT_SIGNALOSOME	GO_WNT_SIGNALOSOME	12	-0.644064	-1.60502	0.0369458	0.416546	3105	tags=50%, list=16%, signal=42%	LRP6/FZD1/LRRK2/GSK3B/LRP5/DVL1
GO_PREPULSE_INHIBITION	GO_PREPULSE_INHIBITION	GO_PREPULSE_INHIBITION	14	-0.643205	-1.67379	0.0125628	0.352816	911	tags=29%, list=5%, signal=27%	DVL1/PTEN/GRIN1/DRD3
GO_N_GLYCAN_PROCESSING	GO_N_GLYCAN_PROCESSING	GO_N_GLYCAN_PROCESSING	12	-0.64276	-1.60177	0.0369458	0.416546	2717	tags=67%, list=14%, signal=57%	MAN2A2/MAN1C1/GANAB/MAN1A2/PRKCSH/ST8SIA4/MGAT4A/MAN2A1
GO_POSITIVE_REGULATION_OF_CELLULAR_EXTRAVASATION	GO_POSITIVE_REGULATION_OF_CELLULAR_EXTRAVASATION	GO_POSITIVE_REGULATION_OF_CELLULAR_EXTRAVASATION	15	-0.641321	-1.68541	0.0153061	0.356699	2451	tags=33%, list=13%, signal=29%	PLVAP/CCR2/CD99L2/MDK/PDGFD
GO_SHORT_CHAIN_FATTY_ACID_METABOLIC_PROCESS	GO_SHORT_CHAIN_FATTY_ACID_METABOLIC_PROCESS	GO_SHORT_CHAIN_FATTY_ACID_METABOLIC_PROCESS	15	-0.637953	-1.67656	0.0153061	0.356699	4807	tags=60%, list=25%, signal=45%	ALDH5A1/ACSS1/THNSL2/PCK2/ACOT4/PCCA/PCK1/PHYH/ACSS2
GO_POSITIVE_REGULATION_OF_ERAD_PATHWAY	GO_POSITIVE_REGULATION_OF_ERAD_PATHWAY	GO_POSITIVE_REGULATION_OF_ERAD_PATHWAY	15	-0.637925	-1.67648	0.0153061	0.356699	14	tags=27%, list=0%, signal=27%	BAG6/EDEM2/UBQLN1/HERPUD1
GO_L_PHENYLALANINE_METABOLIC_PROCESS	GO_L_PHENYLALANINE_METABOLIC_PROCESS	GO_L_PHENYLALANINE_METABOLIC_PROCESS	11	-0.637043	-1.55185	0.0479616	0.421511	4288	tags=45%, list=22%, signal=35%	IL4I1/PAH/PCBD1/KYAT1/GSTZ1
GO_CELLULAR_ANION_HOMEOSTASIS	GO_CELLULAR_ANION_HOMEOSTASIS	GO_CELLULAR_ANION_HOMEOSTASIS	11	-0.634972	-1.5468	0.0479616	0.421511	1923	tags=45%, list=10%, signal=41%	SLC34A1/ABCC2/ENPP1/SLC12A5/XPR1
GO_RESPONSE_TO_NITROSATIVE_STRESS	GO_RESPONSE_TO_NITROSATIVE_STRESS	GO_RESPONSE_TO_NITROSATIVE_STRESS	11	-0.6343	-1.54517	0.0479616	0.421511	2565	tags=45%, list=13%, signal=39%	DNAJA1/ATM/ATG5/STOX1/DDIT3
GO_NEGATIVE_REGULATION_OF_NERVOUS_SYSTEM_PROCESS	GO_NEGATIVE_REGULATION_OF_NERVOUS_SYSTEM_PROCESS	GO_NEGATIVE_REGULATION_OF_NERVOUS_SYSTEM_PROCESS	25	-0.633342	-1.8724	0.00289855	0.273844	2628	tags=32%, list=14%, signal=28%	LRRK2/MTMR2/EIF2AK3/CELF4/PTEN/CTSC/EIF4A3/TMEM98
GO_G_PROTEIN_COUPLED_RECEPTOR_INTERNALIZATION	GO_G_PROTEIN_COUPLED_RECEPTOR_INTERNALIZATION	GO_G_PROTEIN_COUPLED_RECEPTOR_INTERNALIZATION	16	-0.628084	-1.65927	0.0189189	0.356742	88	tags=25%, list=0%, signal=25%	DNM1/HTR1B/ADM/DRD3
GO_MITOCHONDRIA_ASSOCIATED_ENDOPLASMIC_RETICULUM_MEMBRANE	GO_MITOCHONDRIA_ASSOCIATED_ENDOPLASMIC_RETICULUM_MEMBRANE	GO_MITOCHONDRIA_ASSOCIATED_ENDOPLASMIC_RETICULUM_MEMBRANE	12	-0.627527	-1.56381	0.044335	0.421511	1643	tags=42%, list=9%, signal=38%	ZFYVE1/RAB38/ATG5/PDZD8/CANX
GO_NEGATIVE_REGULATION_OF_RESPONSE_TO_DRUG	GO_NEGATIVE_REGULATION_OF_RESPONSE_TO_DRUG	GO_NEGATIVE_REGULATION_OF_RESPONSE_TO_DRUG	31	-0.627445	-1.93449	0.00309598	0.273844	3037	tags=32%, list=16%, signal=27%	RGS4/PDE8A/LRRK2/OSR1/PALM/SNCA/CNR1/NR4A3/DRD3/TRAP1
GO_LIPID_PHOSPHATASE_ACTIVITY	GO_LIPID_PHOSPHATASE_ACTIVITY	GO_LIPID_PHOSPHATASE_ACTIVITY	13	-0.625701	-1.60506	0.026699	0.37805	2391	tags=38%, list=12%, signal=34%	PLPPR4/EPHX2/PLPP3/PLPP1/PLPP2
GO_DNA_APURINIC_OR_APYRIMIDINIC_SITE_ENDONUCLEASE_ACTIVITY	GO_DNA_APURINIC_OR_APYRIMIDINIC_SITE_ENDONUCLEASE_ACTIVITY	GO_DNA_APURINIC_OR_APYRIMIDINIC_SITE_ENDONUCLEASE_ACTIVITY	12	-0.624538	-1.55636	0.046798	0.421511	577	tags=50%, list=3%, signal=49%	HMGA1/NEIL3/RPS3/POLB/NEIL1/OGG1
GO_NEGATIVE_REGULATION_OF_CELL_FATE_COMMITMENT	GO_NEGATIVE_REGULATION_OF_CELL_FATE_COMMITMENT	GO_NEGATIVE_REGULATION_OF_CELL_FATE_COMMITMENT	12	-0.62406	-1.55517	0.046798	0.421511	3070	tags=42%, list=16%, signal=35%	SPDEF/MESP1/FZD7/TBX21/HES1
GO_PHOSPHATIDATE_PHOSPHATASE_ACTIVITY	GO_PHOSPHATIDATE_PHOSPHATASE_ACTIVITY	GO_PHOSPHATIDATE_PHOSPHATASE_ACTIVITY	13	-0.623287	-1.59887	0.026699	0.37805	2391	tags=31%, list=12%, signal=27%	PLPPR4/PLPP3/PLPP1/PLPP2
GO_ADENOHYPOPHYSIS_DEVELOPMENT	GO_ADENOHYPOPHYSIS_DEVELOPMENT	GO_ADENOHYPOPHYSIS_DEVELOPMENT	12	-0.622388	-1.551	0.0492611	0.421511	10	tags=25%, list=0%, signal=25%	POU1F1/DRD2/HES1
GO_NUCLEOSOMAL_DNA_BINDING	GO_NUCLEOSOMAL_DNA_BINDING	GO_NUCLEOSOMAL_DNA_BINDING	22	-0.619323	-1.77594	0.00569801	0.305317	872	tags=27%, list=5%, signal=26%	HMGN5/HMGN1/HMGN2/SMARCE1/RBBP4/MBD2
GO_ENDOPLASMIC_RETICULUM_CALCIUM_ION_HOMEOSTASIS	GO_ENDOPLASMIC_RETICULUM_CALCIUM_ION_HOMEOSTASIS	GO_ENDOPLASMIC_RETICULUM_CALCIUM_ION_HOMEOSTASIS	23	-0.618559	-1.78866	0.00288184	0.273844	1670	tags=48%, list=9%, signal=44%	KCTD17/SELENOK/PSEN1/BCL2/PML/BAX/CAMK2D/TMBIM6/RAP1GDS1/ITPR1/HERPUD1
GO_POSITIVE_REGULATION_OF_RENAL_SODIUM_EXCRETION	GO_POSITIVE_REGULATION_OF_RENAL_SODIUM_EXCRETION	GO_POSITIVE_REGULATION_OF_RENAL_SODIUM_EXCRETION	14	-0.618316	-1.60902	0.0251256	0.376003	125	tags=29%, list=1%, signal=28%	EDNRB/TAC1/SNX5/DRD3
GO_NEGATIVE_REGULATION_OF_VOLTAGE_GATED_CALCIUM_CHANNEL_ACTIVITY	GO_NEGATIVE_REGULATION_OF_VOLTAGE_GATED_CALCIUM_CHANNEL_ACTIVITY	GO_NEGATIVE_REGULATION_OF_VOLTAGE_GATED_CALCIUM_CHANNEL_ACTIVITY	19	-0.608002	-1.68368	0.0162602	0.356699	4186	tags=42%, list=22%, signal=33%	RRAD/OR13F1/CBARP/OR56A4/OPRL1/GNB5/GEM/DRD3
GO_CARBON_NITROGEN_LYASE_ACTIVITY	GO_CARBON_NITROGEN_LYASE_ACTIVITY	GO_CARBON_NITROGEN_LYASE_ACTIVITY	13	-0.607102	-1.55735	0.0412621	0.419649	2504	tags=38%, list=13%, signal=33%	APMAP/FTCD/HAL/GGCT/CHAC1
GO_NEGATIVE_REGULATION_OF_SYNAPTIC_TRANSMISSION_GLUTAMATERGIC	GO_NEGATIVE_REGULATION_OF_SYNAPTIC_TRANSMISSION_GLUTAMATERGIC	GO_NEGATIVE_REGULATION_OF_SYNAPTIC_TRANSMISSION_GLUTAMATERGIC	14	-0.60221	-1.56711	0.0376884	0.416546	519	tags=64%, list=3%, signal=63%	PLA2G6/OR5T1/ADORA1/DRD2/OR13F1/OR56A4/HTR1B/GRIK2/DRD3
GO_NEGATIVE_REGULATION_OF_PHOSPHATIDYLINOSITOL_3_KINASE_SIGNALING	GO_NEGATIVE_REGULATION_OF_PHOSPHATIDYLINOSITOL_3_KINASE_SIGNALING	GO_NEGATIVE_REGULATION_OF_PHOSPHATIDYLINOSITOL_3_KINASE_SIGNALING	15	-0.601647	-1.58114	0.0306122	0.399183	2071	tags=27%, list=11%, signal=24%	CRYBA1/KLF4/PTEN/STAMBP
GO_PRODUCTION_OF_SMALL_RNA_INVOLVED_IN_GENE_SILENCING_BY_RNA	GO_PRODUCTION_OF_SMALL_RNA_INVOLVED_IN_GENE_SILENCING_BY_RNA	GO_PRODUCTION_OF_SMALL_RNA_INVOLVED_IN_GENE_SILENCING_BY_RNA	47	0.600882	1.78716	0.00140845	0.250229	2200	tags=32%, list=11%, signal=28%	RIPK1/BCDIN3D/SMAD3/ZC3H10/TUT7/PUM2/NCOR1/DICER1/PUM1/EGFR/METTL3/DGCR8/DDX5/TUT4/TERT
GO_INTESTINAL_EPITHELIAL_CELL_DIFFERENTIATION	GO_INTESTINAL_EPITHELIAL_CELL_DIFFERENTIATION	GO_INTESTINAL_EPITHELIAL_CELL_DIFFERENTIATION	20	0.603218	1.49216	0.0442338	0.421511	633	tags=20%, list=3%, signal=19%	CDX2/PRDM1/SAV1/HOXA5
GO_REGULATION_OF_CHROMATIN_BINDING	GO_REGULATION_OF_CHROMATIN_BINDING	GO_REGULATION_OF_CHROMATIN_BINDING	19	0.607537	1.4784	0.0458136	0.421511	1709	tags=26%, list=9%, signal=24%	TDG/WAPL/PARP9/FBH1/KDM1A
GO_REGULATION_OF_TRANSCRIPTION_ELONGATION_FROM_RNA_POLYMERASE_II_PROMOTER	GO_REGULATION_OF_TRANSCRIPTION_ELONGATION_FROM_RNA_POLYMERASE_II_PROMOTER	GO_REGULATION_OF_TRANSCRIPTION_ELONGATION_FROM_RNA_POLYMERASE_II_PROMOTER	29	0.610038	1.64287	0.00907716	0.333723	3701	tags=45%, list=19%, signal=36%	CDK9/CTR9/HNRNPU/EZH2/LEO1/CDK13/BRD4/GTF2F2/WDR43/RECQL5/SUPT16H/EAPP/CDC73
GO_REGULATION_OF_HOMOTYPIC_CELL_CELL_ADHESION	GO_REGULATION_OF_HOMOTYPIC_CELL_CELL_ADHESION	GO_REGULATION_OF_HOMOTYPIC_CELL_CELL_ADHESION	25	0.6147	1.60505	0.0182648	0.356699	1167	tags=20%, list=6%, signal=19%	UBASH3B/PRKCD/CEACAM1/SH2B3/LGALS1
GO_INTRAMOLECULAR_TRANSFERASE_ACTIVITY	GO_INTRAMOLECULAR_TRANSFERASE_ACTIVITY	GO_INTRAMOLECULAR_TRANSFERASE_ACTIVITY	25	0.615186	1.60632	0.0167428	0.356699	752	tags=16%, list=4%, signal=15%	RPUSD2/PUS1/DKC1/PGM2L1
GO_POSITIVE_REGULATION_OF_CELL_SUBSTRATE_JUNCTION_ORGANIZATION	GO_POSITIVE_REGULATION_OF_CELL_SUBSTRATE_JUNCTION_ORGANIZATION	GO_POSITIVE_REGULATION_OF_CELL_SUBSTRATE_JUNCTION_ORGANIZATION	26	0.617157	1.63091	0.0136778	0.356699	3719	tags=50%, list=19%, signal=40%	NRP1/SMAD3/SDC4/MAP4K4/ITGB1BP1/RAC1/S100A10/PPM1F/TEK/TSC1/PTPRJ/MYOC/COL16A1
GO_HISTONE_DEUBIQUITINATION	GO_HISTONE_DEUBIQUITINATION	GO_HISTONE_DEUBIQUITINATION	20	0.619287	1.53191	0.0331754	0.404798	3432	tags=30%, list=18%, signal=25%	USP21/EPOP/USP15/UIMC1/BAP1/USP7
GO_RNA_POLYMERASE_II_GENERAL_TRANSCRIPTION_INITIATION_FACTOR_BINDING	GO_RNA_POLYMERASE_II_GENERAL_TRANSCRIPTION_INITIATION_FACTOR_BINDING	GO_RNA_POLYMERASE_II_GENERAL_TRANSCRIPTION_INITIATION_FACTOR_BINDING	19	0.621172	1.51158	0.0394945	0.419649	1638	tags=32%, list=9%, signal=29%	TBP/ZNHIT6/HNRNPU/GTF2E1/RUVBL1/NOP58
GO_ARF_PROTEIN_SIGNAL_TRANSDUCTION	GO_ARF_PROTEIN_SIGNAL_TRANSDUCTION	GO_ARF_PROTEIN_SIGNAL_TRANSDUCTION	18	0.62219	1.50073	0.0411392	0.419649	4127	tags=50%, list=21%, signal=39%	ARFGAP1/CYTH4/MAP4K4/CYTH2/PSD3/ARFGEF1/IQSEC3/PSD2/FBXO8
GO_HYALURONAN_METABOLIC_PROCESS	GO_HYALURONAN_METABOLIC_PROCESS	GO_HYALURONAN_METABOLIC_PROCESS	34	0.623348	1.73201	0.00735294	0.311553	2885	tags=38%, list=15%, signal=33%	HYAL1/HAS3/HYAL3/ABCC5/CEMIP2/HYAL2/HGF/PDGFB/SLC9A1/IL1B/HMMR/FGF2/PIM1
GO_RNA_METHYLTRANSFERASE_ACTIVITY	GO_RNA_METHYLTRANSFERASE_ACTIVITY	GO_RNA_METHYLTRANSFERASE_ACTIVITY	54	0.624676	1.89439	0.0027933	0.273844	2383	tags=37%, list=12%, signal=33%	BCDIN3D/NOP2/METTL1/MRM3/TRMT10C/NSUN2/LCMT2/DIMT1/TRMT61B/TRMT44/METTL3/TRMT2A/TRMT2B/TRMO/METTL2A/EMG1/MRM1/RAMAC/THUMPD3/TRMT1L
GO_REGULATION_OF_HISTONE_H3_K9_METHYLATION	GO_REGULATION_OF_HISTONE_H3_K9_METHYLATION	GO_REGULATION_OF_HISTONE_H3_K9_METHYLATION	22	0.627105	1.58867	0.015361	0.356699	1709	tags=27%, list=9%, signal=25%	JARID2/ZNF274/BRCA1/DNMT3B/RIF1/KDM1A
GO_NEGATIVE_REGULATION_OF_HISTONE_METHYLATION	GO_NEGATIVE_REGULATION_OF_HISTONE_METHYLATION	GO_NEGATIVE_REGULATION_OF_HISTONE_METHYLATION	17	0.627437	1.50372	0.0489731	0.421511	1709	tags=29%, list=9%, signal=27%	JARID2/PRMT6/BRCA1/DNMT3B/KDM1A
GO_REGULATION_OF_ANTIGEN_PROCESSING_AND_PRESENTATION	GO_REGULATION_OF_ANTIGEN_PROCESSING_AND_PRESENTATION	GO_REGULATION_OF_ANTIGEN_PROCESSING_AND_PRESENTATION	19	0.628586	1.52962	0.0347551	0.410042	2847	tags=32%, list=15%, signal=27%	NOD2/YTHDF1/NOD1/CD68/FCGR2B/HFE
GO_ESTABLISHMENT_OR_MAINTENANCE_OF_CYTOSKELETON_POLARITY	GO_ESTABLISHMENT_OR_MAINTENANCE_OF_CYTOSKELETON_POLARITY	GO_ESTABLISHMENT_OR_MAINTENANCE_OF_CYTOSKELETON_POLARITY	18	0.630214	1.52009	0.0411392	0.419649	4253	tags=39%, list=22%, signal=30%	RHOB/RND3/CAMSAP3/RHOD/RHOBTB1/RHOC/RICTOR
GO_INFLAMMATORY_CELL_APOPTOTIC_PROCESS	GO_INFLAMMATORY_CELL_APOPTOTIC_PROCESS	GO_INFLAMMATORY_CELL_APOPTOTIC_PROCESS	22	0.632083	1.60128	0.015361	0.356699	2843	tags=27%, list=15%, signal=23%	SELENOS/NOD2/ANXA1/CTSL/PIK3CD/IRF7
GO_RESPONSE_TO_HYDROPEROXIDE	GO_RESPONSE_TO_HYDROPEROXIDE	GO_RESPONSE_TO_HYDROPEROXIDE	18	0.632573	1.52577	0.0379747	0.416546	2384	tags=33%, list=12%, signal=29%	TP53INP1/PRKCD/JAK2/STX2/CD38/STX4
GO_RIBOSOMAL_SMALL_SUBUNIT_BIOGENESIS	GO_RIBOSOMAL_SMALL_SUBUNIT_BIOGENESIS	GO_RIBOSOMAL_SMALL_SUBUNIT_BIOGENESIS	64	0.633431	1.95992	0.00139665	0.250229	3283	tags=45%, list=17%, signal=38%	RCL1/RRS1/SURF6/LTV1/NGDN/UTP4/BYSL/PWP2/RIOK2/RPS27L/UTP3/BTRC/TSR3/UTP6/RRP36/DHX37/UTP23/KRI1/BMS1/RPS16/NOL11/EMG1/RPS27/TSR1/DDX52/MRPS11/HELQ/ERAL1/RIOK1
GO_GTP_RHO_BINDING	GO_GTP_RHO_BINDING	GO_GTP_RHO_BINDING	21	0.634349	1.59897	0.0200308	0.362263	2686	tags=43%, list=14%, signal=37%	RTKN/CDC42EP2/PKN3/EXOC1/KCTD10/TRIOBP/TNFAIP1/ROCK2/CDC42EP3
GO_MAMMARY_GLAND_EPITHELIAL_CELL_PROLIFERATION	GO_MAMMARY_GLAND_EPITHELIAL_CELL_PROLIFERATION	GO_MAMMARY_GLAND_EPITHELIAL_CELL_PROLIFERATION	25	0.635119	1.65836	0.0106545	0.340968	2051	tags=40%, list=11%, signal=36%	CCND1/RREB1/KDM5B/HOXA5/RTN4/DEAF1/BTRC/EPHA2/CEBPB/STAT6
GO_UTERUS_DEVELOPMENT	GO_UTERUS_DEVELOPMENT	GO_UTERUS_DEVELOPMENT	22	0.635255	1.60932	0.015361	0.356699	1776	tags=32%, list=9%, signal=29%	WNT7A/KDM5B/SRC/GREB1L/NIPBL/CYP19A1/WNT9B
GO_REGULATION_OF_EXOSOMAL_SECRETION	GO_REGULATION_OF_EXOSOMAL_SECRETION	GO_REGULATION_OF_EXOSOMAL_SECRETION	16	0.638525	1.51677	0.0458861	0.421511	2367	tags=38%, list=12%, signal=33%	SDC4/VPS4B/HGS/PDCD6IP/TSG101/SDC1
GO_REGULATION_OF_PLATELET_ACTIVATION	GO_REGULATION_OF_PLATELET_ACTIVATION	GO_REGULATION_OF_PLATELET_ACTIVATION	31	0.639343	1.75118	0.00589102	0.305317	4576	tags=42%, list=24%, signal=32%	UBASH3B/PRKCD/CEACAM1/SH2B3/PDGFB/F2/FGG/ABAT/SERPINE2/PRKG1/PDGFA/PLEK/C1QTNF1
GO_CORONARY_VASCULATURE_MORPHOGENESIS	GO_CORONARY_VASCULATURE_MORPHOGENESIS	GO_CORONARY_VASCULATURE_MORPHOGENESIS	18	0.640794	1.5456	0.0316456	0.399337	1273	tags=22%, list=7%, signal=21%	NRP1/SPRED1/ARID2/NOTCH1
GO_TRANSCRIPTIONALLY_ACTIVE_CHROMATIN	GO_TRANSCRIPTIONALLY_ACTIVE_CHROMATIN	GO_TRANSCRIPTIONALLY_ACTIVE_CHROMATIN	19	0.640866	1.5595	0.0331754	0.404798	630	tags=21%, list=3%, signal=20%	AFF4/KMT2E/EXOSC4/CTR9
GO_REGULATION_OF_MICROTUBULE_DEPOLYMERIZATION	GO_REGULATION_OF_MICROTUBULE_DEPOLYMERIZATION	GO_REGULATION_OF_MICROTUBULE_DEPOLYMERIZATION	28	0.641809	1.71327	0.00458015	0.303856	1258	tags=29%, list=7%, signal=27%	NAV3/ARHGEF2/MAP6D1/CLASP1/CAMSAP2/CIB1/HDAC6/CAMSAP3
GO_REGULATION_OF_LOW_DENSITY_LIPOPROTEIN_PARTICLE_CLEARANCE	GO_REGULATION_OF_LOW_DENSITY_LIPOPROTEIN_PARTICLE_CLEARANCE	GO_REGULATION_OF_LOW_DENSITY_LIPOPROTEIN_PARTICLE_CLEARANCE	17	0.642631	1.54014	0.0379147	0.416546	1632	tags=24%, list=8%, signal=22%	LDLRAP1/CSK/CNPY2/ANXA2
GO_PEPTIDE_TRANSMEMBRANE_TRANSPORTER_ACTIVITY	GO_PEPTIDE_TRANSMEMBRANE_TRANSPORTER_ACTIVITY	GO_PEPTIDE_TRANSMEMBRANE_TRANSPORTER_ACTIVITY	29	0.643007	1.73166	0.00605144	0.305317	2425	tags=31%, list=13%, signal=27%	TIMM23/SLC15A4/TIMM22/MCL1/DISP1/TOMM40L/ABCB9/TOMM40/TAPBP
GO_TRNA_METHYLATION	GO_TRNA_METHYLATION	GO_TRNA_METHYLATION	33	0.645155	1.7812	0.00296736	0.273844	2383	tags=36%, list=12%, signal=32%	BCDIN3D/METTL1/TRMT10C/NSUN2/LCMT2/TRMT61B/TRMT44/GTPBP3/TRMO/METTL2A/THUMPD3/TRMT1L
GO_NEGATIVE_REGULATION_OF_POSTTRANSCRIPTIONAL_GENE_SILENCING	GO_NEGATIVE_REGULATION_OF_POSTTRANSCRIPTIONAL_GENE_SILENCING	GO_NEGATIVE_REGULATION_OF_POSTTRANSCRIPTIONAL_GENE_SILENCING	15	0.646209	1.50429	0.047541	0.421511	689	tags=20%, list=4%, signal=19%	BCDIN3D/ZC3H10/NCOR1
GO_NEGATIVE_REGULATION_OF_ANOIKIS	GO_NEGATIVE_REGULATION_OF_ANOIKIS	GO_NEGATIVE_REGULATION_OF_ANOIKIS	15	0.647168	1.50653	0.047541	0.421511	2144	tags=47%, list=11%, signal=41%	PTRH2/ITGA5/SRC/CAV1/MCL1/NOTCH1/ITGB1
GO_RRNA_METHYLATION	GO_RRNA_METHYLATION	GO_RRNA_METHYLATION	20	0.648661	1.60458	0.0189573	0.356742	3794	tags=55%, list=20%, signal=44%	NOP2/MRM3/DIMT1/TRMT61B/NSUN5/EMG1/MRM1/FTSJ3/TFB2M/METTL16/TFB1M
GO_POSITIVE_REGULATION_OF_RESPONSE_TO_OXIDATIVE_STRESS	GO_POSITIVE_REGULATION_OF_RESPONSE_TO_OXIDATIVE_STRESS	GO_POSITIVE_REGULATION_OF_RESPONSE_TO_OXIDATIVE_STRESS	16	0.648803	1.54119	0.0411392	0.419649	2053	tags=38%, list=11%, signal=34%	RIPK1/HDAC6/MCL1/ENDOG/ACOX2/FBXW7
GO_COPPER_ION_TRANSPORT	GO_COPPER_ION_TRANSPORT	GO_COPPER_ION_TRANSPORT	17	0.649209	1.5559	0.0315956	0.399337	693	tags=18%, list=4%, signal=17%	ATP7B/SCO2/SCO1
GO_RESPONSE_TO_UV_B	GO_RESPONSE_TO_UV_B	GO_RESPONSE_TO_UV_B	17	0.653266	1.56563	0.0315956	0.399337	637	tags=24%, list=3%, signal=23%	HYAL1/HYAL3/XPC/HYAL2
GO_RRNA_MODIFICATION	GO_RRNA_MODIFICATION	GO_RRNA_MODIFICATION	29	0.654325	1.76214	0.00453858	0.303856	4306	tags=62%, list=22%, signal=48%	RPUSD2/NOP2/MRM3/DKC1/DIMT1/TRMT61B/TSR3/NSUN5/EMG1/MRM1/GAR1/FTSJ3/TFB2M/METTL16/TFB1M/NOP10/RPUSD1/BUD23
GO_CATALYTIC_ACTIVITY_ACTING_ON_A_RRNA	GO_CATALYTIC_ACTIVITY_ACTING_ON_A_RRNA	GO_CATALYTIC_ACTIVITY_ACTING_ON_A_RRNA	17	0.655104	1.57003	0.0315956	0.399337	4663	tags=71%, list=24%, signal=54%	NOP2/MRM3/DIMT1/TRMT61B/EMG1/MRM1/FTSJ3/TFB2M/METTL16/TFB1M/BUD23/NSUN4
GO_SMALL_NUCLEOLAR_RIBONUCLEOPROTEIN_COMPLEX	GO_SMALL_NUCLEOLAR_RIBONUCLEOPROTEIN_COMPLEX	GO_SMALL_NUCLEOLAR_RIBONUCLEOPROTEIN_COMPLEX	24	0.655697	1.69972	0.00759878	0.311553	2775	tags=42%, list=14%, signal=36%	NOLC1/DKC1/MPHOSPH10/NOP56/POP1/NOP58/RPP25/GAR1/SNU13/RRP9
GO_NEGATIVE_REGULATION_OF_EXTRINSIC_APOPTOTIC_SIGNALING_PATHWAY_VIA_DEATH_DOMAIN_RECEPTORS	GO_NEGATIVE_REGULATION_OF_EXTRINSIC_APOPTOTIC_SIGNALING_PATHWAY_VIA_DEATH_DOMAIN_RECEPTORS	GO_NEGATIVE_REGULATION_OF_EXTRINSIC_APOPTOTIC_SIGNALING_PATHWAY_VIA_DEATH_DOMAIN_RECEPTORS	37	0.656803	1.85253	0.00146628	0.250229	2301	tags=38%, list=12%, signal=33%	RIPK1/ARHGEF2/SERPINE1/TRADD/RNF34/BRCA1/HGF/FAIM/HMOX1/FAS/BCL2L1/TNFRSF10B/MIR221/TMBIM1
GO_ESTABLISHMENT_OR_MAINTENANCE_OF_ACTIN_CYTOSKELETON_POLARITY	GO_ESTABLISHMENT_OR_MAINTENANCE_OF_ACTIN_CYTOSKELETON_POLARITY	GO_ESTABLISHMENT_OR_MAINTENANCE_OF_ACTIN_CYTOSKELETON_POLARITY	14	0.657423	1.49895	0.0496689	0.421511	4253	tags=43%, list=22%, signal=33%	RHOB/RND3/RHOD/RHOBTB1/RHOC/RICTOR
GO_POSITIVE_REGULATION_OF_HISTONE_H3_K4_METHYLATION	GO_POSITIVE_REGULATION_OF_HISTONE_H3_K4_METHYLATION	GO_POSITIVE_REGULATION_OF_HISTONE_H3_K4_METHYLATION	17	0.657754	1.57638	0.0300158	0.39712	789	tags=29%, list=4%, signal=28%	KMT2E/CTR9/BRCA1/PRDM9/DNMT3B
GO_LUNG_CELL_DIFFERENTIATION	GO_LUNG_CELL_DIFFERENTIATION	GO_LUNG_CELL_DIFFERENTIATION	23	0.657849	1.68487	0.00763359	0.311553	1183	tags=30%, list=6%, signal=29%	KLF2/AIMP2/SAV1/HOXA5/THRA/GRHL2/SOX9
GO_CARD_DOMAIN_BINDING	GO_CARD_DOMAIN_BINDING	GO_CARD_DOMAIN_BINDING	15	0.658845	1.53371	0.0393443	0.419649	1301	tags=27%, list=7%, signal=25%	CARD10/NOD2/CASP4/NOD1
GO_MICROTUBULE_END	GO_MICROTUBULE_END	GO_MICROTUBULE_END	33	0.659081	1.81965	0.00148368	0.250229	2724	tags=39%, list=14%, signal=34%	NIN/NAV3/ABRAXAS2/CLASP1/CAMSAP2/GAS2L1/CAMSAP3/CLIP1/CDK5RAP2/RNF4/MAPRE1/SLAIN2/ASPM
GO_GENERAL_TRANSCRIPTION_INITIATION_FACTOR_ACTIVITY	GO_GENERAL_TRANSCRIPTION_INITIATION_FACTOR_ACTIVITY	GO_GENERAL_TRANSCRIPTION_INITIATION_FACTOR_ACTIVITY	18	0.661431	1.59538	0.0237342	0.37417	3207	tags=44%, list=17%, signal=37%	TBP/GTF3C2/TAF5/RRN3/GTF2E1/GTF3C1/TAF1/GTF2B
GO_TOLL_LIKE_RECEPTOR_9_SIGNALING_PATHWAY	GO_TOLL_LIKE_RECEPTOR_9_SIGNALING_PATHWAY	GO_TOLL_LIKE_RECEPTOR_9_SIGNALING_PATHWAY	20	0.665524	1.64629	0.014218	0.356699	2288	tags=40%, list=12%, signal=35%	MYD88/TRAF6/GRAMD4/RTN4/TLR8/PIK3C3/UNC93B1/PIK3R4
GO_SNORNA_BINDING	GO_SNORNA_BINDING	GO_SNORNA_BINDING	26	0.667828	1.76481	0.00607903	0.305317	2775	tags=54%, list=14%, signal=46%	IMP3/NOLC1/DKC1/BYSL/NOP56/UTP6/IMP4/NUFIP1/BMS1/NOP58/GAR1/TSR1/SNU13/RRP9
GO_BRANCHING_INVOLVED_IN_SALIVARY_GLAND_MORPHOGENESIS	GO_BRANCHING_INVOLVED_IN_SALIVARY_GLAND_MORPHOGENESIS	GO_BRANCHING_INVOLVED_IN_SALIVARY_GLAND_MORPHOGENESIS	22	0.669915	1.69713	0.00614439	0.305317	832	tags=23%, list=4%, signal=22%	NRP1/BTBD7/PLXNA1/TGM2/HGF
GO_HISTONE_METHYLTRANSFERASE_ACTIVITY_H3_K4_SPECIFIC	GO_HISTONE_METHYLTRANSFERASE_ACTIVITY_H3_K4_SPECIFIC	GO_HISTONE_METHYLTRANSFERASE_ACTIVITY_H3_K4_SPECIFIC	14	0.670728	1.52929	0.0430464	0.421511	4890	tags=71%, list=25%, signal=53%	KMT2C/CXXC1/PRDM9/WDR5/WDR82/RBBP5/KMT2B/SETD1B/ASH2L/KMT2A
GO_NEGATIVE_REGULATION_OF_MYELOID_CELL_APOPTOTIC_PROCESS	GO_NEGATIVE_REGULATION_OF_MYELOID_CELL_APOPTOTIC_PROCESS	GO_NEGATIVE_REGULATION_OF_MYELOID_CELL_APOPTOTIC_PROCESS	16	0.671192	1.59437	0.0237342	0.37417	372	tags=19%, list=2%, signal=18%	MAEA/SELENOS/NOD2
GO_REGULATION_OF_MRNA_POLYADENYLATION	GO_REGULATION_OF_MRNA_POLYADENYLATION	GO_REGULATION_OF_MRNA_POLYADENYLATION	17	0.671545	1.60943	0.0268562	0.37805	2991	tags=53%, list=16%, signal=45%	CDK9/CTR9/VIRMA/CPEB3/CCNT1/ZC3H3/SUPT5H/ZC3H14/NUDT21
GO_SEMAPHORIN_PLEXIN_SIGNALING_PATHWAY_INVOLVED_IN_NEURON_PROJECTION_GUIDANCE	GO_SEMAPHORIN_PLEXIN_SIGNALING_PATHWAY_INVOLVED_IN_NEURON_PROJECTION_GUIDANCE	GO_SEMAPHORIN_PLEXIN_SIGNALING_PATHWAY_INVOLVED_IN_NEURON_PROJECTION_GUIDANCE	13	0.672005	1.49422	0.0474576	0.421511	363	tags=15%, list=2%, signal=15%	NRP1/PLXNA1
GO_SECONDARY_ACTIVE_MONOCARBOXYLATE_TRANSMEMBRANE_TRANSPORTER_ACTIVITY	GO_SECONDARY_ACTIVE_MONOCARBOXYLATE_TRANSMEMBRANE_TRANSPORTER_ACTIVITY	GO_SECONDARY_ACTIVE_MONOCARBOXYLATE_TRANSMEMBRANE_TRANSPORTER_ACTIVITY	13	0.6737	1.49799	0.0474576	0.421511	768	tags=15%, list=4%, signal=15%	SLC10A4/SLC6A8
GO_90S_PRERIBOSOME	GO_90S_PRERIBOSOME	GO_90S_PRERIBOSOME	27	0.673892	1.7852	0.00306748	0.273844	1519	tags=41%, list=8%, signal=38%	IMP3/WDR37/UTP4/MPHOSPH10/PWP2/BTRC/UTP6/IMP4/RRP36/KRI1/BMS1
GO_MATURATION_OF_SSU_RRNA	GO_MATURATION_OF_SSU_RRNA	GO_MATURATION_OF_SSU_RRNA	45	0.674059	1.98276	0.00141243	0.250229	1662	tags=40%, list=9%, signal=37%	RCL1/RRS1/NGDN/UTP4/BYSL/PWP2/RIOK2/UTP3/BTRC/TSR3/UTP6/RRP36/DHX37/UTP23/KRI1/BMS1/RPS16/NOL11
GO_GOLGI_TO_VACUOLE_TRANSPORT	GO_GOLGI_TO_VACUOLE_TRANSPORT	GO_GOLGI_TO_VACUOLE_TRANSPORT	13	0.675677	1.50238	0.0457627	0.421511	2787	tags=38%, list=14%, signal=33%	VPS54/ANKFY1/AP1G1/RBSN/GAK
GO_SNORNA_METABOLIC_PROCESS	GO_SNORNA_METABOLIC_PROCESS	GO_SNORNA_METABOLIC_PROCESS	14	0.678613	1.54727	0.0380795	0.416968	1252	tags=29%, list=7%, signal=27%	NOLC1/DKC1/EXOSC4/EXOSC2
GO_POSITIVE_REGULATION_OF_INTERLEUKIN_6_BIOSYNTHETIC_PROCESS	GO_POSITIVE_REGULATION_OF_INTERLEUKIN_6_BIOSYNTHETIC_PROCESS	GO_POSITIVE_REGULATION_OF_INTERLEUKIN_6_BIOSYNTHETIC_PROCESS	13	0.679292	1.51042	0.0457627	0.421511	2126	tags=38%, list=11%, signal=34%	TRAF6/STAT3/CLEC7A/TIRAP/IL1B
GO_MEMBRANE_RAFT_ASSEMBLY	GO_MEMBRANE_RAFT_ASSEMBLY	GO_MEMBRANE_RAFT_ASSEMBLY	13	0.682347	1.51722	0.040678	0.419649	2271	tags=38%, list=12%, signal=34%	CAV2/CAV1/ANXA2/S100A10/PACSIN2
GO_PROTEIN_LOCALIZATION_TO_NUCLEOLUS	GO_PROTEIN_LOCALIZATION_TO_NUCLEOLUS	GO_PROTEIN_LOCALIZATION_TO_NUCLEOLUS	15	0.683574	1.59127	0.0213115	0.367498	2236	tags=33%, list=12%, signal=29%	RRS1/NOL8/BYSL/TERT/NMD3
GO_CELLULAR_RESPONSE_TO_INCREASED_OXYGEN_LEVELS	GO_CELLULAR_RESPONSE_TO_INCREASED_OXYGEN_LEVELS	GO_CELLULAR_RESPONSE_TO_INCREASED_OXYGEN_LEVELS	13	0.684815	1.5227	0.0338983	0.406721	4227	tags=62%, list=22%, signal=48%	CAV1/DNMT3B/FAS/FOXO1/NOX1/TMEM199/ATG7/ATP6V0A2
GO_POSITIVE_REGULATION_OF_SEQUESTERING_OF_CALCIUM_ION	GO_POSITIVE_REGULATION_OF_SEQUESTERING_OF_CALCIUM_ION	GO_POSITIVE_REGULATION_OF_SEQUESTERING_OF_CALCIUM_ION	13	0.684923	1.52294	0.0338983	0.406721	91	tags=15%, list=0%, signal=15%	CALM1/NTSR1
GO_SMALL_SUBUNIT_PROCESSOME	GO_SMALL_SUBUNIT_PROCESSOME	GO_SMALL_SUBUNIT_PROCESSOME	34	0.685543	1.90483	0.00147059	0.250229	1809	tags=38%, list=9%, signal=35%	IMP3/NGDN/UTP4/MPHOSPH10/PWP2/NOP56/UTP3/BTRC/UTP6/IMP4/UTP23/NOP58/EMG1
GO_BLOOD_VESSEL_ENDOTHELIAL_CELL_DIFFERENTIATION	GO_BLOOD_VESSEL_ENDOTHELIAL_CELL_DIFFERENTIATION	GO_BLOOD_VESSEL_ENDOTHELIAL_CELL_DIFFERENTIATION	11	0.688109	1.48333	0.0495726	0.421511	1293	tags=36%, list=7%, signal=34%	NRP1/HEY1/NOTCH1/DLL1
GO_PROTEIN_KINASE_B_BINDING	GO_PROTEIN_KINASE_B_BINDING	GO_PROTEIN_KINASE_B_BINDING	11	0.688387	1.48393	0.0495726	0.421511	431	tags=18%, list=2%, signal=18%	SRSF5/TRAF6
GO_LIVER_REGENERATION	GO_LIVER_REGENERATION	GO_LIVER_REGENERATION	29	0.688571	1.85436	0.00302572	0.273844	3287	tags=52%, list=17%, signal=43%	CCND1/SRSF5/EZH2/EGFR/PCNA/HMOX1/SULF2/CEBPB/WDR35/PTCH1/AURKA/HFE/IHH/GLI3/CPB2
GO_FLEMMING_BODY	GO_FLEMMING_BODY	GO_FLEMMING_BODY	30	0.689853	1.87262	0.00149254	0.250229	2546	tags=50%, list=13%, signal=43%	VPS4B/BIRC6/CCDC66/CHAMP1/DCDC1/PDCD6IP/EXOC7/EXOC1/EXOC2/KIF23/CAPG/TSG101/CEP55/NUP62/EXOC6
GO_REGULATION_OF_PROTEIN_DEUBIQUITINATION	GO_REGULATION_OF_PROTEIN_DEUBIQUITINATION	GO_REGULATION_OF_PROTEIN_DEUBIQUITINATION	12	0.690595	1.51731	0.0486577	0.421511	1268	tags=25%, list=7%, signal=23%	OTUD4/ITCH/TRIM21
GO_POSITIVE_REGULATION_OF_TRANSCRIPTION_ELONGATION_FROM_RNA_POLYMERASE_II_PROMOTER	GO_POSITIVE_REGULATION_OF_TRANSCRIPTION_ELONGATION_FROM_RNA_POLYMERASE_II_PROMOTER	GO_POSITIVE_REGULATION_OF_TRANSCRIPTION_ELONGATION_FROM_RNA_POLYMERASE_II_PROMOTER	16	0.691974	1.64373	0.0174051	0.356699	3701	tags=56%, list=19%, signal=45%	CDK9/CTR9/LEO1/CDK13/BRD4/GTF2F2/SUPT16H/EAPP/CDC73
GO_PRERIBOSOME	GO_PRERIBOSOME	GO_PRERIBOSOME	69	0.692376	2.16143	0.00138889	0.250229	2775	tags=51%, list=14%, signal=44%	IMP3/RRS1/WDR37/NIP7/LTV1/WDR74/NGDN/UTP4/MPHOSPH10/BYSL/RRP1B/PWP2/RIOK2/NOP56/EIF6/UTP3/RRP15/ZNF622/RRP1/BTRC/UTP6/IMP4/RRP36/UTP23/KRI1/BMS1/NOP58/EMG1/EBNA1BP2/ZNF593/TSR1/MRPL1/SNU13/FTSJ3/RRP9
GO_HISTONE_ARGININE_METHYLATION	GO_HISTONE_ARGININE_METHYLATION	GO_HISTONE_ARGININE_METHYLATION	11	0.693809	1.49562	0.0461538	0.421511	1266	tags=27%, list=7%, signal=25%	PRMT6/PRDM4/PRMT7
GO_MAP_KINASE_KINASE_KINASE_ACTIVITY	GO_MAP_KINASE_KINASE_KINASE_ACTIVITY	GO_MAP_KINASE_KINASE_KINASE_ACTIVITY	23	0.694307	1.77825	0.00305344	0.273844	2781	tags=52%, list=14%, signal=45%	MAP3K4/MAP3K5/RIPK1/MAP3K15/MAP3K9/EGFR/MAP3K1/TAOK2/MAP3K6/MOS/MAP3K13/RAF1
GO_CORPUS_CALLOSUM_DEVELOPMENT	GO_CORPUS_CALLOSUM_DEVELOPMENT	GO_CORPUS_CALLOSUM_DEVELOPMENT	16	0.694597	1.64997	0.0174051	0.356699	88	tags=19%, list=0%, signal=19%	NIN/TSKU/PAFAH1B1
GO_MRNA_MODIFICATION	GO_MRNA_MODIFICATION	GO_MRNA_MODIFICATION	22	0.695163	1.76109	0.00460829	0.303856	1217	tags=27%, list=6%, signal=26%	PUS1/TRMT10C/DKC1/TRMT61B/VIRMA/METTL3
GO_REGULATION_OF_PRODUCTION_OF_SMALL_RNA_INVOLVED_IN_GENE_SILENCING_BY_RNA	GO_REGULATION_OF_PRODUCTION_OF_SMALL_RNA_INVOLVED_IN_GENE_SILENCING_BY_RNA	GO_REGULATION_OF_PRODUCTION_OF_SMALL_RNA_INVOLVED_IN_GENE_SILENCING_BY_RNA	19	0.695255	1.69186	0.00789889	0.320301	2200	tags=37%, list=11%, signal=33%	RIPK1/BCDIN3D/ZC3H10/NCOR1/EGFR/DDX5/TERT
GO_REGULATION_OF_PLATELET_AGGREGATION	GO_REGULATION_OF_PLATELET_AGGREGATION	GO_REGULATION_OF_PLATELET_AGGREGATION	19	0.695836	1.69327	0.00631912	0.305317	947	tags=21%, list=5%, signal=20%	UBASH3B/PRKCD/CEACAM1/SH2B3
GO_NUCLEOTIDE_SUGAR_TRANSMEMBRANE_TRANSPORT	GO_NUCLEOTIDE_SUGAR_TRANSMEMBRANE_TRANSPORT	GO_NUCLEOTIDE_SUGAR_TRANSMEMBRANE_TRANSPORT	12	0.696111	1.52943	0.0486577	0.421511	3596	tags=58%, list=19%, signal=47%	SLC35C2/SLC35C1/SLC35D2/SLC35B4/SLC35E4/SLC35A2/SLC35A4
GO_REGULATION_OF_NUCLEOBASE_CONTAINING_COMPOUND_TRANSPORT	GO_REGULATION_OF_NUCLEOBASE_CONTAINING_COMPOUND_TRANSPORT	GO_REGULATION_OF_NUCLEOBASE_CONTAINING_COMPOUND_TRANSPORT	16	0.69673	1.65503	0.0158228	0.356699	2793	tags=31%, list=15%, signal=27%	RIPK1/IWS1/RIOK2/TPR/NUP153
GO_POSITIVE_REGULATION_OF_CYTOKINE_PRODUCTION_INVOLVED_IN_INFLAMMATORY_RESPONSE	GO_POSITIVE_REGULATION_OF_CYTOKINE_PRODUCTION_INVOLVED_IN_INFLAMMATORY_RESPONSE	GO_POSITIVE_REGULATION_OF_CYTOKINE_PRODUCTION_INVOLVED_IN_INFLAMMATORY_RESPONSE	16	0.697442	1.65672	0.0142405	0.356699	1725	tags=31%, list=9%, signal=28%	MYD88/NOD2/TICAM1/IL17RA/CLEC7A
GO_COPPER_ION_HOMEOSTASIS	GO_COPPER_ION_HOMEOSTASIS	GO_COPPER_ION_HOMEOSTASIS	14	0.698591	1.59282	0.0281457	0.385729	1965	tags=36%, list=10%, signal=32%	ATP7B/SCO2/SCO1/CCDC22/MT2A
GO_NOTCH_SIGNALING_INVOLVED_IN_HEART_DEVELOPMENT	GO_NOTCH_SIGNALING_INVOLVED_IN_HEART_DEVELOPMENT	GO_NOTCH_SIGNALING_INVOLVED_IN_HEART_DEVELOPMENT	11	0.699027	1.50686	0.0444444	0.421511	1273	tags=45%, list=7%, signal=42%	NOTCH2/HEY1/GALNT11/HEYL/NOTCH1
GO_ECTODERMAL_PLACODE_DEVELOPMENT	GO_ECTODERMAL_PLACODE_DEVELOPMENT	GO_ECTODERMAL_PLACODE_DEVELOPMENT	13	0.699074	1.55441	0.0271186	0.37805	2023	tags=31%, list=11%, signal=28%	NRP1/SIX4/FRS2/TBX2
GO_ARYLSULFATASE_ACTIVITY	GO_ARYLSULFATASE_ACTIVITY	GO_ARYLSULFATASE_ACTIVITY	11	0.69909	1.507	0.0444444	0.421511	3219	tags=45%, list=17%, signal=38%	ARSD/ARSB/SULF2/ARSA/ARSG
GO_REGULATION_OF_CD8_POSITIVE_ALPHA_BETA_T_CELL_ACTIVATION	GO_REGULATION_OF_CD8_POSITIVE_ALPHA_BETA_T_CELL_ACTIVATION	GO_REGULATION_OF_CD8_POSITIVE_ALPHA_BETA_T_CELL_ACTIVATION	12	0.700506	1.53908	0.0436242	0.421511	4283	tags=67%, list=22%, signal=52%	RUNX1/IRF1/CD274/XCL1/HFE/CBFB/SH3RF1/NCKAP1L
GO_POSITIVE_REGULATION_OF_RECEPTOR_BIOSYNTHETIC_PROCESS	GO_POSITIVE_REGULATION_OF_RECEPTOR_BIOSYNTHETIC_PROCESS	GO_POSITIVE_REGULATION_OF_RECEPTOR_BIOSYNTHETIC_PROCESS	13	0.701616	1.56006	0.0254237	0.377425	2832	tags=46%, list=15%, signal=39%	HOXA5/CNPY2/HDAC6/JAK2/NR1H3/EDN1
GO_POSITIVE_REGULATION_OF_HISTONE_H3_K9_METHYLATION	GO_POSITIVE_REGULATION_OF_HISTONE_H3_K9_METHYLATION	GO_POSITIVE_REGULATION_OF_HISTONE_H3_K9_METHYLATION	11	0.704081	1.51776	0.0410256	0.419649	3347	tags=45%, list=17%, signal=38%	JARID2/BRCA1/RIF1/DMRTC2/PRDM5
GO_SEMAPHORIN_RECEPTOR_ACTIVITY	GO_SEMAPHORIN_RECEPTOR_ACTIVITY	GO_SEMAPHORIN_RECEPTOR_ACTIVITY	12	0.704215	1.54723	0.0402685	0.419649	363	tags=17%, list=2%, signal=16%	NRP1/PLXNA1
GO_PRERIBOSOME_SMALL_SUBUNIT_PRECURSOR	GO_PRERIBOSOME_SMALL_SUBUNIT_PRECURSOR	GO_PRERIBOSOME_SMALL_SUBUNIT_PRECURSOR	14	0.709605	1.61793	0.0231788	0.373551	4072	tags=79%, list=21%, signal=62%	LTV1/BYSL/RRP1B/RIOK2/RRP1/TSR1/FTSJ3/RIOK1/FAM207A/NOC4L/UTP20
GO_INVADOPODIUM	GO_INVADOPODIUM	GO_INVADOPODIUM	15	0.709894	1.65254	0.0180328	0.356699	3189	tags=60%, list=17%, signal=50%	EZR/PLAUR/MSN/ITGA3/RUFY3/ITGB1/WASHC1/FSCN1/NOX1
GO_SKELETAL_MUSCLE_SATELLITE_CELL_PROLIFERATION	GO_SKELETAL_MUSCLE_SATELLITE_CELL_PROLIFERATION	GO_SKELETAL_MUSCLE_SATELLITE_CELL_PROLIFERATION	13	0.710584	1.58	0.0220339	0.369076	3151	tags=46%, list=16%, signal=39%	PAXBP1/JAK2/STAT3/FGF2/AKIRIN1/PPARD
GO_PSEUDOURIDINE_SYNTHESIS	GO_PSEUDOURIDINE_SYNTHESIS	GO_PSEUDOURIDINE_SYNTHESIS	15	0.710615	1.65422	0.0180328	0.356699	394	tags=20%, list=2%, signal=20%	RPUSD2/PUS1/DKC1
GO_HYALURONAN_CATABOLIC_PROCESS	GO_HYALURONAN_CATABOLIC_PROCESS	GO_HYALURONAN_CATABOLIC_PROCESS	15	0.7116	1.65651	0.0180328	0.356699	2838	tags=47%, list=15%, signal=40%	HYAL1/HYAL3/CEMIP2/HYAL2/SLC9A1/HMMR/FGF2
GO_NEGATIVE_REGULATION_OF_HOMOTYPIC_CELL_CELL_ADHESION	GO_NEGATIVE_REGULATION_OF_HOMOTYPIC_CELL_CELL_ADHESION	GO_NEGATIVE_REGULATION_OF_HOMOTYPIC_CELL_CELL_ADHESION	14	0.712355	1.6242	0.0231788	0.373551	947	tags=29%, list=5%, signal=27%	UBASH3B/PRKCD/CEACAM1/SH2B3
GO_MITOGEN_ACTIVATED_PROTEIN_KINASE_KINASE_KINASE_BINDING	GO_MITOGEN_ACTIVATED_PROTEIN_KINASE_KINASE_KINASE_BINDING	GO_MITOGEN_ACTIVATED_PROTEIN_KINASE_KINASE_KINASE_BINDING	15	0.713243	1.66034	0.0180328	0.356699	1058	tags=33%, list=5%, signal=32%	STK38/MAP2K4/TRAF6/MARVELD3/ROR2
GO_NEGATIVE_REGULATION_OF_PLATELET_ACTIVATION	GO_NEGATIVE_REGULATION_OF_PLATELET_ACTIVATION	GO_NEGATIVE_REGULATION_OF_PLATELET_ACTIVATION	19	0.713256	1.73566	0.00473934	0.303856	4576	tags=63%, list=24%, signal=48%	UBASH3B/PRKCD/CEACAM1/SH2B3/PDGFB/F2/FGG/ABAT/SERPINE2/PRKG1/PDGFA/C1QTNF1
GO_DEATH_DOMAIN_BINDING	GO_DEATH_DOMAIN_BINDING	GO_DEATH_DOMAIN_BINDING	10	0.714436	1.51233	0.0488215	0.421511	1469	tags=40%, list=8%, signal=37%	RIPK1/TRADD/MCL1/BCL2L1
GO_CHONDROITIN_SULFATE_CATABOLIC_PROCESS	GO_CHONDROITIN_SULFATE_CATABOLIC_PROCESS	GO_CHONDROITIN_SULFATE_CATABOLIC_PROCESS	14	0.714982	1.63019	0.0231788	0.373551	1233	tags=36%, list=6%, signal=33%	HYAL1/CSPG4/VCAN/BCAN/ARSB
GO_SEMAPHORIN_RECEPTOR_COMPLEX	GO_SEMAPHORIN_RECEPTOR_COMPLEX	GO_SEMAPHORIN_RECEPTOR_COMPLEX	11	0.71554	1.54246	0.0393162	0.419649	363	tags=18%, list=2%, signal=18%	NRP1/PLXNA1
GO_TRNA_METHYLTRANSFERASE_ACTIVITY	GO_TRNA_METHYLTRANSFERASE_ACTIVITY	GO_TRNA_METHYLTRANSFERASE_ACTIVITY	29	0.716062	1.9284	0.00151286	0.250229	2383	tags=41%, list=12%, signal=36%	BCDIN3D/METTL1/TRMT10C/NSUN2/LCMT2/TRMT61B/TRMT44/TRMT2B/TRMO/METTL2A/THUMPD3/TRMT1L
GO_NEGATIVE_REGULATION_OF_INTERFERON_BETA_PRODUCTION	GO_NEGATIVE_REGULATION_OF_INTERFERON_BETA_PRODUCTION	GO_NEGATIVE_REGULATION_OF_INTERFERON_BETA_PRODUCTION	15	0.71842	1.67239	0.0147541	0.356699	2229	tags=47%, list=12%, signal=41%	NLRX1/PPM1B/SIRPA/CACTIN/TRAIP/TRAF3IP1/RELB
GO_POSITIVE_REGULATION_OF_CHROMATIN_SILENCING	GO_POSITIVE_REGULATION_OF_CHROMATIN_SILENCING	GO_POSITIVE_REGULATION_OF_CHROMATIN_SILENCING	11	0.719885	1.55183	0.0376068	0.416546	2143	tags=36%, list=11%, signal=32%	PPHLN1/MPHOSPH8/SETDB1/MORC2
GO_REGULATION_OF_METHYLATION_DEPENDENT_CHROMATIN_SILENCING	GO_REGULATION_OF_METHYLATION_DEPENDENT_CHROMATIN_SILENCING	GO_REGULATION_OF_METHYLATION_DEPENDENT_CHROMATIN_SILENCING	10	0.720571	1.52531	0.043771	0.421511	2143	tags=40%, list=11%, signal=36%	PPHLN1/MPHOSPH8/SETDB1/MORC2
GO_CELLULAR_COPPER_ION_HOMEOSTASIS	GO_CELLULAR_COPPER_ION_HOMEOSTASIS	GO_CELLULAR_COPPER_ION_HOMEOSTASIS	12	0.722028	1.58637	0.0302013	0.39712	1965	tags=42%, list=10%, signal=37%	ATP7B/SCO2/SCO1/CCDC22/MT2A
GO_UV_PROTECTION	GO_UV_PROTECTION	GO_UV_PROTECTION	12	0.724575	1.59197	0.0234899	0.37417	1299	tags=33%, list=7%, signal=31%	SCARA3/ERCC3/FEN1/MC1R
GO_S100_PROTEIN_BINDING	GO_S100_PROTEIN_BINDING	GO_S100_PROTEIN_BINDING	13	0.724602	1.61117	0.020339	0.364205	1876	tags=38%, list=10%, signal=35%	AHNAK/EZR/ANXA2/S100A6/S100A11
GO_POSITIVE_REGULATION_OF_VACUOLE_ORGANIZATION	GO_POSITIVE_REGULATION_OF_VACUOLE_ORGANIZATION	GO_POSITIVE_REGULATION_OF_VACUOLE_ORGANIZATION	14	0.725838	1.65494	0.0182119	0.356699	3644	tags=64%, list=19%, signal=52%	LRSAM1/RAB3GAP2/ULK1/PIP4K2A/ANXA2/PIP4K2C/KIAA1324/PIP4K2B/RALB
GO_REGULATION_OF_HISTONE_UBIQUITINATION	GO_REGULATION_OF_HISTONE_UBIQUITINATION	GO_REGULATION_OF_HISTONE_UBIQUITINATION	10	0.726342	1.53753	0.0387205	0.419649	1709	tags=40%, list=9%, signal=36%	UBE2N/CDK9/CTR9/KDM1A
GO_RESPONSE_TO_FUNGICIDE	GO_RESPONSE_TO_FUNGICIDE	GO_RESPONSE_TO_FUNGICIDE	10	0.728862	1.54286	0.03367	0.406721	1709	tags=50%, list=9%, signal=46%	KLF2/XRN1/KDM5B/BCL2L1/KDM1A
GO_LAMELLIPODIUM_MORPHOGENESIS	GO_LAMELLIPODIUM_MORPHOGENESIS	GO_LAMELLIPODIUM_MORPHOGENESIS	16	0.72987	1.73375	0.00474684	0.303856	519	tags=25%, list=3%, signal=24%	RREB1/ARHGEF7/KANK1/SRC
GO_MATURATION_OF_SSU_RRNA_FROM_TRICISTRONIC_RRNA_TRANSCRIPT_SSU_RRNA_5_8S_RRNA_LSU_RRNA	GO_MATURATION_OF_SSU_RRNA_FROM_TRICISTRONIC_RRNA_TRANSCRIPT_SSU_RRNA_5_8S_RRNA_LSU_RRNA	GO_MATURATION_OF_SSU_RRNA_FROM_TRICISTRONIC_RRNA_TRANSCRIPT_SSU_RRNA_5_8S_RRNA_LSU_RRNA	33	0.733354	2.02471	0.00148368	0.250229	1578	tags=45%, list=8%, signal=42%	RCL1/RRS1/NGDN/UTP4/BYSL/PWP2/UTP3/BTRC/UTP6/RRP36/DHX37/UTP23/KRI1/BMS1/RPS16
GO_DENDRITIC_CELL_ANTIGEN_PROCESSING_AND_PRESENTATION	GO_DENDRITIC_CELL_ANTIGEN_PROCESSING_AND_PRESENTATION	GO_DENDRITIC_CELL_ANTIGEN_PROCESSING_AND_PRESENTATION	11	0.736296	1.5872	0.0273504	0.38032	2431	tags=36%, list=13%, signal=32%	NOD2/NOD1/CD68/FCGR2B
GO_NEGATIVE_REGULATION_OF_GENE_SILENCING_BY_MIRNA	GO_NEGATIVE_REGULATION_OF_GENE_SILENCING_BY_MIRNA	GO_NEGATIVE_REGULATION_OF_GENE_SILENCING_BY_MIRNA	12	0.736903	1.61905	0.0218121	0.369076	689	tags=25%, list=4%, signal=24%	BCDIN3D/ZC3H10/NCOR1
GO_STAGA_COMPLEX	GO_STAGA_COMPLEX	GO_STAGA_COMPLEX	10	0.737363	1.56086	0.026936	0.37805	533	tags=20%, list=3%, signal=19%	TADA1/TADA2B
GO_ATTACHMENT_OF_MITOTIC_SPINDLE_MICROTUBULES_TO_KINETOCHORE	GO_ATTACHMENT_OF_MITOTIC_SPINDLE_MICROTUBULES_TO_KINETOCHORE	GO_ATTACHMENT_OF_MITOTIC_SPINDLE_MICROTUBULES_TO_KINETOCHORE	12	0.743343	1.6332	0.0201342	0.362263	1997	tags=50%, list=10%, signal=45%	MAD1L1/HNRNPU/CHAMP1/CENPC/SEH1L/CENPE
GO_FATTY_ACID_SYNTHASE_ACTIVITY	GO_FATTY_ACID_SYNTHASE_ACTIVITY	GO_FATTY_ACID_SYNTHASE_ACTIVITY	11	0.744089	1.604	0.0222222	0.369076	1069	tags=36%, list=6%, signal=34%	MCAT/ELOVL3/ELOVL6/FASN
GO_NEGATIVE_REGULATION_OF_PLATELET_AGGREGATION	GO_NEGATIVE_REGULATION_OF_PLATELET_AGGREGATION	GO_NEGATIVE_REGULATION_OF_PLATELET_AGGREGATION	12	0.744862	1.63654	0.0184564	0.356742	947	tags=33%, list=5%, signal=32%	UBASH3B/PRKCD/CEACAM1/SH2B3
GO_TOLL_LIKE_RECEPTOR_BINDING	GO_TOLL_LIKE_RECEPTOR_BINDING	GO_TOLL_LIKE_RECEPTOR_BINDING	11	0.745463	1.60697	0.0222222	0.369076	1912	tags=36%, list=10%, signal=33%	MYD88/TOLLIP/TIRAP/UNC93B1
GO_MRNA_METHYLTRANSFERASE_ACTIVITY	GO_MRNA_METHYLTRANSFERASE_ACTIVITY	GO_MRNA_METHYLTRANSFERASE_ACTIVITY	10	0.747562	1.58245	0.0252525	0.376111	3424	tags=60%, list=18%, signal=49%	TRMT10C/TRMT61B/METTL3/RAMAC/CMTR2/METTL16
GO_POSITIVE_REGULATION_OF_CHOLESTEROL_METABOLIC_PROCESS	GO_POSITIVE_REGULATION_OF_CHOLESTEROL_METABOLIC_PROCESS	GO_POSITIVE_REGULATION_OF_CHOLESTEROL_METABOLIC_PROCESS	10	0.749198	1.58591	0.0252525	0.376111	1667	tags=30%, list=9%, signal=27%	LDLRAP1/SREBF1/PRKAA1
GO_POSITIVE_REGULATION_OF_AUTOPHAGOSOME_ASSEMBLY	GO_POSITIVE_REGULATION_OF_AUTOPHAGOSOME_ASSEMBLY	GO_POSITIVE_REGULATION_OF_AUTOPHAGOSOME_ASSEMBLY	11	0.751008	1.61892	0.0188034	0.356742	3644	tags=73%, list=19%, signal=59%	LRSAM1/RAB3GAP2/ULK1/PIP4K2A/PIP4K2C/KIAA1324/PIP4K2B/RALB
GO_HYALURONAN_BIOSYNTHETIC_PROCESS	GO_HYALURONAN_BIOSYNTHETIC_PROCESS	GO_HYALURONAN_BIOSYNTHETIC_PROCESS	12	0.753553	1.65563	0.0167785	0.356699	2126	tags=42%, list=11%, signal=37%	HYAL1/HAS3/ABCC5/PDGFB/IL1B
GO_GLOMERULAR_EPITHELIAL_CELL_DEVELOPMENT	GO_GLOMERULAR_EPITHELIAL_CELL_DEVELOPMENT	GO_GLOMERULAR_EPITHELIAL_CELL_DEVELOPMENT	11	0.759863	1.63801	0.0188034	0.356742	1193	tags=27%, list=6%, signal=26%	NOTCH2/PODXL/MYO1E
GO_LAMININ_COMPLEX	GO_LAMININ_COMPLEX	GO_LAMININ_COMPLEX	10	0.761793	1.61257	0.023569	0.37417	1494	tags=30%, list=8%, signal=28%	LAMA3/LAMB3/LAMC2
GO_PRERIBOSOME_LARGE_SUBUNIT_PRECURSOR	GO_PRERIBOSOME_LARGE_SUBUNIT_PRECURSOR	GO_PRERIBOSOME_LARGE_SUBUNIT_PRECURSOR	20	0.763813	1.88942	0.00315956	0.273844	3296	tags=70%, list=17%, signal=58%	RRS1/WDR37/NIP7/WDR74/RRP1B/EIF6/RRP15/ZNF622/RRP1/EBNA1BP2/ZNF593/FTSJ3/MRTO4/BOP1
GO_NEGATIVE_REGULATION_OF_FIBRINOLYSIS	GO_NEGATIVE_REGULATION_OF_FIBRINOLYSIS	GO_NEGATIVE_REGULATION_OF_FIBRINOLYSIS	10	0.766581	1.62271	0.0218855	0.369076	3287	tags=50%, list=17%, signal=41%	SERPINF2/SERPINE1/F2/USF1/CPB2
GO_HEXOSAMINIDASE_ACTIVITY	GO_HEXOSAMINIDASE_ACTIVITY	GO_HEXOSAMINIDASE_ACTIVITY	14	0.771231	1.75844	0.00496689	0.303856	1056	tags=36%, list=5%, signal=34%	HYAL1/HYAL3/CEMIP2/HYAL2/OGA
GO_MAINTENANCE_OF_APICAL_BASAL_CELL_POLARITY	GO_MAINTENANCE_OF_APICAL_BASAL_CELL_POLARITY	GO_MAINTENANCE_OF_APICAL_BASAL_CELL_POLARITY	10	0.771503	1.63313	0.016835	0.356699	2057	tags=50%, list=11%, signal=45%	PDCD6IP/WDR1/WNT11/LIN7C/LIN7B
GO_POSITIVE_REGULATION_OF_CELL_CELL_ADHESION_MEDIATED_BY_CADHERIN	GO_POSITIVE_REGULATION_OF_CELL_CELL_ADHESION_MEDIATED_BY_CADHERIN	GO_POSITIVE_REGULATION_OF_CELL_CELL_ADHESION_MEDIATED_BY_CADHERIN	10	0.772655	1.63557	0.016835	0.356699	1215	tags=30%, list=6%, signal=28%	SERPINF2/ADAM19/DENND6A
GO_ENDONUCLEOLYTIC_CLEAVAGE_INVOLVED_IN_RRNA_PROCESSING	GO_ENDONUCLEOLYTIC_CLEAVAGE_INVOLVED_IN_RRNA_PROCESSING	GO_ENDONUCLEOLYTIC_CLEAVAGE_INVOLVED_IN_RRNA_PROCESSING	10	0.777281	1.64536	0.016835	0.356699	1465	tags=40%, list=8%, signal=37%	RCL1/RRS1/UTP23/KRI1
GO_G_PROTEIN_COUPLED_RECEPTOR_SIGNALING_PATHWAY_INVOLVED_IN_HEART_PROCESS	GO_G_PROTEIN_COUPLED_RECEPTOR_SIGNALING_PATHWAY_INVOLVED_IN_HEART_PROCESS	GO_G_PROTEIN_COUPLED_RECEPTOR_SIGNALING_PATHWAY_INVOLVED_IN_HEART_PROCESS	13	0.778436	1.73087	0.00847458	0.329244	861	tags=31%, list=4%, signal=29%	SRC/AKAP13/CAV1/ATP2B4
GO_RIBONUCLEASE_P_COMPLEX	GO_RIBONUCLEASE_P_COMPLEX	GO_RIBONUCLEASE_P_COMPLEX	10	0.778896	1.64878	0.0151515	0.356699	1841	tags=40%, list=10%, signal=36%	TRMT10C/RPP38/POP1/RPP25
GO_HEMIDESMOSOME_ASSEMBLY	GO_HEMIDESMOSOME_ASSEMBLY	GO_HEMIDESMOSOME_ASSEMBLY	11	0.788796	1.70038	0.0102564	0.337509	1494	tags=55%, list=8%, signal=50%	LAMA3/PLEC/LAMB3/COL17A1/ITGB4/LAMC2
GO_POSITIVE_REGULATION_OF_OXIDATIVE_STRESS_INDUCED_CELL_DEATH	GO_POSITIVE_REGULATION_OF_OXIDATIVE_STRESS_INDUCED_CELL_DEATH	GO_POSITIVE_REGULATION_OF_OXIDATIVE_STRESS_INDUCED_CELL_DEATH	12	0.791316	1.7386	0.00671141	0.305317	2053	tags=42%, list=11%, signal=37%	RIPK1/HDAC6/MCL1/ENDOG/FBXW7
GO_RRNA_CONTAINING_RIBONUCLEOPROTEIN_COMPLEX_EXPORT_FROM_NUCLEUS	GO_RRNA_CONTAINING_RIBONUCLEOPROTEIN_COMPLEX_EXPORT_FROM_NUCLEUS	GO_RRNA_CONTAINING_RIBONUCLEOPROTEIN_COMPLEX_EXPORT_FROM_NUCLEUS	14	0.794901	1.81241	0.00331126	0.273844	2422	tags=64%, list=13%, signal=56%	RRS1/LTV1/RIOK2/EIF6/ABCE1/SDAD1/NMD3/ZNF593/TSC1
GO_PSEUDOURIDINE_SYNTHASE_ACTIVITY	GO_PSEUDOURIDINE_SYNTHASE_ACTIVITY	GO_PSEUDOURIDINE_SYNTHASE_ACTIVITY	12	0.805311	1.76935	0.00503356	0.303856	394	tags=25%, list=2%, signal=25%	RPUSD2/PUS1/DKC1
GO_REGULATION_OF_MAMMARY_GLAND_EPITHELIAL_CELL_PROLIFERATION	GO_REGULATION_OF_MAMMARY_GLAND_EPITHELIAL_CELL_PROLIFERATION	GO_REGULATION_OF_MAMMARY_GLAND_EPITHELIAL_CELL_PROLIFERATION	15	0.806471	1.87736	0.00327869	0.273844	717	tags=40%, list=4%, signal=39%	CCND1/RREB1/KDM5B/HOXA5/RTN4/DEAF1
GO_STRUCTURAL_MOLECULE_ACTIVITY_CONFERRING_ELASTICITY	GO_STRUCTURAL_MOLECULE_ACTIVITY_CONFERRING_ELASTICITY	GO_STRUCTURAL_MOLECULE_ACTIVITY_CONFERRING_ELASTICITY	10	0.822201	1.74045	0.00505051	0.303856	109	tags=20%, list=1%, signal=20%	EMILIN2/AHNAK
GO_REGULATION_OF_LAMELLIPODIUM_MORPHOGENESIS	GO_REGULATION_OF_LAMELLIPODIUM_MORPHOGENESIS	GO_REGULATION_OF_LAMELLIPODIUM_MORPHOGENESIS	11	0.833221	1.79614	0.0017094	0.273844	519	tags=36%, list=3%, signal=35%	RREB1/ARHGEF7/KANK1/SRC
Gene Ontologies list sorted for increasing enrichment score values (abs es ≥0.60, P-value <0.05) in the siTRAP1 0.5% O2 vs. siNEG 0.5% O2 experimental condition.

## Sheet: GO_siNEG 05%O2 vs. siNEG 20%O2
Table SIII. Continued.
row.names	ID	Description	setSize	enrichmentScore	NES	P-value	Q-value	rank	leading_edge	core_enrichment
GO_MRNA_METHYLTRANSFERASE_ACTIVITY	GO_MRNA_METHYLTRANSFERASE_ACTIVITY	GO_MRNA_METHYLTRANSFERASE_ACTIVITY	10	-0.844817	-1.66844	0.00169492	0.0810766	2309	tags=70%, list=12%, signal=62%	RAMAC/CMTR2/CMTR1/METTL3/TRMT61A/TRMT61B/TRMT10C
GO_PSEUDOURIDINE_SYNTHASE_ACTIVITY	GO_PSEUDOURIDINE_SYNTHASE_ACTIVITY	GO_PSEUDOURIDINE_SYNTHASE_ACTIVITY	12	-0.836031	-1.71377	0.00169492	0.0810766	1492	tags=67%, list=8%, signal=62%	TRUB1/RPUSD1/TRUB2/RPUSD3/PUS7/DKC1/PUS1/RPUSD2
GO_PSEUDOURIDINE_SYNTHESIS	GO_PSEUDOURIDINE_SYNTHESIS	GO_PSEUDOURIDINE_SYNTHESIS	15	-0.82294	-1.76728	0.00339559	0.0810766	2469	tags=67%, list=13%, signal=58%	TRUB1/NOP10/RPUSD1/TRUB2/RPUSD3/PUS7/GAR1/DKC1/PUS1/RPUSD2
GO_CATALYTIC_ACTIVITY_ACTING_ON_A_RRNA	GO_CATALYTIC_ACTIVITY_ACTING_ON_A_RRNA	GO_CATALYTIC_ACTIVITY_ACTING_ON_A_RRNA	17	-0.815909	-1.8037	0.00168067	0.0810766	1473	tags=47%, list=8%, signal=43%	TFB2M/MRM1/EMG1/TRMT61B/FTSJ3/MRM3/NOP2/DIMT1
GO_RIBONUCLEASE_P_COMPLEX	GO_RIBONUCLEASE_P_COMPLEX	GO_RIBONUCLEASE_P_COMPLEX	10	-0.815581	-1.6107	0.00508475	0.0835886	2989	tags=80%, list=16%, signal=68%	POP7/HSD17B10/RPP25/RPP38/POP5/RPP40/POP1/TRMT10C
GO_DOUBLE_STRAND_BREAK_REPAIR_VIA_BREAK_INDUCED_REPLICATION	GO_DOUBLE_STRAND_BREAK_REPAIR_VIA_BREAK_INDUCED_REPLICATION	GO_DOUBLE_STRAND_BREAK_REPAIR_VIA_BREAK_INDUCED_REPLICATION	11	-0.808081	-1.62232	0.00679117	0.0870899	3352	tags=91%, list=17%, signal=75%	CDC45/MUS81/MCM5/MCM4/GINS4/MCM7/GINS2/MCM3/MCM6/CDC7
GO_SET1C_COMPASS_COMPLEX	GO_SET1C_COMPASS_COMPLEX	GO_SET1C_COMPASS_COMPLEX	10	-0.795059	-1.57017	0.00847458	0.0913109	2841	tags=70%, list=15%, signal=60%	SETD1B/HCFC1/DPY30/RBBP5/CXXC1/ASH2L/WDR5
GO_FMN_BINDING	GO_FMN_BINDING	GO_FMN_BINDING	15	-0.793096	-1.70319	0.00679117	0.0870899	2500	tags=33%, list=13%, signal=29%	PNPO/TYW1B/MTRR/DHODH/DUS2
GO_REGULATION_OF_TRANSCRIPTION_OF_NUCLEOLAR_LARGE_RRNA_BY_RNA_POLYMERASE_I	GO_REGULATION_OF_TRANSCRIPTION_OF_NUCLEOLAR_LARGE_RRNA_BY_RNA_POLYMERASE_I	GO_REGULATION_OF_TRANSCRIPTION_OF_NUCLEOLAR_LARGE_RRNA_BY_RNA_POLYMERASE_I	10	-0.792592	-1.5653	0.00847458	0.0913109	1697	tags=50%, list=9%, signal=46%	DDX11/NCL/MTOR/PWP1/NOL11
GO_TRAPP_COMPLEX	GO_TRAPP_COMPLEX	GO_TRAPP_COMPLEX	12	-0.790917	-1.62129	0.00847458	0.0913109	1764	tags=33%, list=9%, signal=30%	TRAPPC10/TRAPPC3/TRAPPC4/TRAPPC12
GO_SMN_SM_PROTEIN_COMPLEX	GO_SMN_SM_PROTEIN_COMPLEX	GO_SMN_SM_PROTEIN_COMPLEX	13	-0.790365	-1.6225	0.00687285	0.0870899	3580	tags=69%, list=19%, signal=56%	SNRPF/GEMIN2/SNRPG/DDX20/SNRPD1/SNRPB/GEMIN5/GEMIN6/GEMIN4
GO_PROTEASOME_CORE_COMPLEX_BETA_SUBUNIT_COMPLEX	GO_PROTEASOME_CORE_COMPLEX_BETA_SUBUNIT_COMPLEX	GO_PROTEASOME_CORE_COMPLEX_BETA_SUBUNIT_COMPLEX	11	-0.784006	-1.57399	0.0101868	0.0978487	3385	tags=82%, list=18%, signal=67%	PSMB7/PSMB10/PSMB4/PSMB2/PSMB3/PSMB5/PSMB1/PSMB6/PSMB9
GO_DNA_N_GLYCOSYLASE_ACTIVITY	GO_DNA_N_GLYCOSYLASE_ACTIVITY	GO_DNA_N_GLYCOSYLASE_ACTIVITY	12	-0.783488	-1.60606	0.0101695	0.0978487	2715	tags=58%, list=14%, signal=50%	OGG1/NEIL2/NEIL3/PCNA/UNG/NTHL1/TDG
GO_90S_PRERIBOSOME	GO_90S_PRERIBOSOME	GO_90S_PRERIBOSOME	27	-0.782498	-1.91441	0.00161031	0.0810766	3775	tags=81%, list=20%, signal=66%	BOP1/FBXW9/SRFBP1/PES1/NOL6/TBL3/HEATR1/NOC4L/WDR12/PWP2/BTRC/UTP6/MRPL1/BMS1/WDR37/IMP4/MPHOSPH10/UTP4/IMP3/KRI1/RRP7A/RRP36
GO_HISTONE_ARGININE_METHYLATION	GO_HISTONE_ARGININE_METHYLATION	GO_HISTONE_ARGININE_METHYLATION	11	-0.775926	-1.55777	0.0152801	0.120931	970	tags=55%, list=5%, signal=52%	PRMT1/PRMT5/COPRS/PRMT7/PRDM4/PRMT6
GO_COPPER_ION_TRANSPORT	GO_COPPER_ION_TRANSPORT	GO_COPPER_ION_TRANSPORT	17	-0.774883	-1.71301	0.00336134	0.0810766	1161	tags=35%, list=6%, signal=33%	SLC31A2/ATP7B/SLC11A2/SCO1/SCO2/CUTC
GO_RRNA_METHYLATION	GO_RRNA_METHYLATION	GO_RRNA_METHYLATION	20	-0.773854	-1.75868	0.0033389	0.0810766	1473	tags=45%, list=8%, signal=42%	NSUN5/TFB2M/MRM1/EMG1/TRMT61B/FTSJ3/MRM3/NOP2/DIMT1
GO_TRNA_METHYLTRANSFERASE_ACTIVITY	GO_TRNA_METHYLTRANSFERASE_ACTIVITY	GO_TRNA_METHYLTRANSFERASE_ACTIVITY	29	-0.773603	-1.92155	0.00161551	0.0810766	3167	tags=69%, list=16%, signal=58%	TRMT2B/TRMT10B/ALKBH8/METTL6/WDR4/TRMT6/TRMO/THUMPD3/TRMT44/NSUN6/TRDMT1/TRMT1L/METTL2A/TRMT61A/TRMT61B/NSUN2/TRMT10C/METTL1/LCMT2/BCDIN3D
GO_ALDITOL_PHOSPHATE_METABOLIC_PROCESS	GO_ALDITOL_PHOSPHATE_METABOLIC_PROCESS	GO_ALDITOL_PHOSPHATE_METABOLIC_PROCESS	10	-0.771876	-1.52439	0.0169492	0.128355	2173	tags=60%, list=11%, signal=53%	GK/GK5/ACP6/ABHD6/GPD1L/GPAM
GO_ENDONUCLEOLYTIC_CLEAVAGE_INVOLVED_IN_RRNA_PROCESSING	GO_ENDONUCLEOLYTIC_CLEAVAGE_INVOLVED_IN_RRNA_PROCESSING	GO_ENDONUCLEOLYTIC_CLEAVAGE_INVOLVED_IN_RRNA_PROCESSING	10	-0.770545	-1.52176	0.0169492	0.128355	1680	tags=60%, list=9%, signal=55%	BOP1/NOL9/UTP23/KRI1/RRS1/RCL1
GO_SMALL_SUBUNIT_PROCESSOME	GO_SMALL_SUBUNIT_PROCESSOME	GO_SMALL_SUBUNIT_PROCESSOME	34	-0.770142	-1.97023	0.00158228	0.0810766	3300	tags=74%, list=17%, signal=61%	KRR1/DCAF13/NOL6/TBL3/HEATR1/NOC4L/WDR46/UTP11/RRP9/UTP23/PWP2/BTRC/UTP14C/UTP6/SNU13/UTP3/NOP58/EMG1/UTP14A/IMP4/MPHOSPH10/NGDN/UTP4/IMP3/NOP56
GO_RRNA_MODIFICATION	GO_RRNA_MODIFICATION	GO_RRNA_MODIFICATION	29	-0.768256	-1.90827	0.00161551	0.0810766	2400	tags=52%, list=12%, signal=45%	NOP10/NSUN5/RPUSD1/TFB2M/TSR3/MRM1/EMG1/GAR1/TRMT61B/FTSJ3/DKC1/MRM3/NOP2/DIMT1/RPUSD2
GO_N_TERMINAL_PROTEIN_ACETYLTRANSFERASE_COMPLEX	GO_N_TERMINAL_PROTEIN_ACETYLTRANSFERASE_COMPLEX	GO_N_TERMINAL_PROTEIN_ACETYLTRANSFERASE_COMPLEX	10	-0.767332	-1.51541	0.020339	0.141986	3611	tags=60%, list=19%, signal=49%	NAA30/NAA16/NAA15/NAA25/NAA35/NAA20
GO_3_5_DNA_HELICASE_ACTIVITY	GO_3_5_DNA_HELICASE_ACTIVITY	GO_3_5_DNA_HELICASE_ACTIVITY	15	-0.766705	-1.64652	0.0101868	0.0978487	3352	tags=73%, list=17%, signal=61%	CDC45/DHX9/FBH1/MCM5/WRN/GINS4/MCM7/GINS2/MCM6/ERCC3/BLM
GO_NEGATIVE_REGULATION_OF_CALCIUM_ION_TRANSPORT_INTO_CYTOSOL	GO_NEGATIVE_REGULATION_OF_CALCIUM_ION_TRANSPORT_INTO_CYTOSOL	GO_NEGATIVE_REGULATION_OF_CALCIUM_ION_TRANSPORT_INTO_CYTOSOL	15	-0.765446	-1.64381	0.0101868	0.0978487	2958	tags=40%, list=15%, signal=34%	BCL2/CALM2/GSTO1/PKD2/NTSR1/CALM1
GO_DNA_STRAND_ELONGATION_INVOLVED_IN_DNA_REPLICATION	GO_DNA_STRAND_ELONGATION_INVOLVED_IN_DNA_REPLICATION	GO_DNA_STRAND_ELONGATION_INVOLVED_IN_DNA_REPLICATION	17	-0.764183	-1.68935	0.00336134	0.0810766	2662	tags=71%, list=14%, signal=61%	RFC3/DNA2/POLD2/MCM4/LIG3/RFC4/GINS4/MCM7/GINS2/MCM3/PCNA/GINS3
GO_MISMATCHED_DNA_BINDING	GO_MISMATCHED_DNA_BINDING	GO_MISMATCHED_DNA_BINDING	14	-0.763906	-1.60158	0.0101351	0.0978487	2681	tags=50%, list=14%, signal=43%	MSH6/PMS1/PMS2/PCNA/XPC/APTX/TDG
GO_TRNA_SPECIFIC_RIBONUCLEASE_ACTIVITY	GO_TRNA_SPECIFIC_RIBONUCLEASE_ACTIVITY	GO_TRNA_SPECIFIC_RIBONUCLEASE_ACTIVITY	12	-0.763164	-1.5644	0.0152542	0.120893	3161	tags=67%, list=16%, signal=56%	TSEN15/POP7/ELAC2/RPP25/RPP38/POP5/RPP40/POP1
GO_PYRIMIDINE_NUCLEOTIDE_CATABOLIC_PROCESS	GO_PYRIMIDINE_NUCLEOTIDE_CATABOLIC_PROCESS	GO_PYRIMIDINE_NUCLEOTIDE_CATABOLIC_PROCESS	11	-0.762506	-1.53082	0.0203735	0.141986	2715	tags=64%, list=14%, signal=55%	OGG1/NEIL2/NT5C/DCTPP1/UNG/NTHL1/TDG
GO_PROTEASOME_CORE_COMPLEX	GO_PROTEASOME_CORE_COMPLEX	GO_PROTEASOME_CORE_COMPLEX	19	-0.762387	-1.72219	0.00165563	0.0810766	3385	tags=74%, list=18%, signal=61%	PSMB7/PSMB10/PSMB4/PSMB2/PSMA2/PSMB3/PSMF1/PSMA4/PSMB5/PSMB1/PSMA3/PSMB6/PSMB9/PSMA5
GO_NEGATIVE_REGULATION_OF_RYANODINE_SENSITIVE_CALCIUM_RELEASE_CHANNEL_ACTIVITY	GO_NEGATIVE_REGULATION_OF_RYANODINE_SENSITIVE_CALCIUM_RELEASE_CHANNEL_ACTIVITY	GO_NEGATIVE_REGULATION_OF_RYANODINE_SENSITIVE_CALCIUM_RELEASE_CHANNEL_ACTIVITY	10	-0.760824	-1.50256	0.0254237	0.160044	2650	tags=40%, list=14%, signal=35%	CALM2/GSTO1/PKD2/CALM1
GO_TRNA_THREONYLCARBAMOYLADENOSINE_METABOLIC_PROCESS	GO_TRNA_THREONYLCARBAMOYLADENOSINE_METABOLIC_PROCESS	GO_TRNA_THREONYLCARBAMOYLADENOSINE_METABOLIC_PROCESS	15	-0.760433	-1.63305	0.0101868	0.0978487	1131	tags=67%, list=6%, signal=63%	TRMT5/TRIT1/OSGEP/HSD17B10/CDK5RAP1/TRMT61B/TP53RK/OSGEPL1/TRMT10C/PUS1
GO_RNA_POLYMERASE_III_TRANSCRIPTION_FACTOR_COMPLEX	GO_RNA_POLYMERASE_III_TRANSCRIPTION_FACTOR_COMPLEX	GO_RNA_POLYMERASE_III_TRANSCRIPTION_FACTOR_COMPLEX	11	-0.759534	-1.52486	0.0203735	0.141986	3943	tags=64%, list=20%, signal=51%	GTF3C3/GTF3C5/GTF3C1/GTF3C6/BRF1/GTF3C2/TBP
GO_PRERIBOSOME_LARGE_SUBUNIT_PRECURSOR	GO_PRERIBOSOME_LARGE_SUBUNIT_PRECURSOR	GO_PRERIBOSOME_LARGE_SUBUNIT_PRECURSOR	20	-0.758793	-1.72445	0.0033389	0.0810766	3775	tags=90%, list=20%, signal=72%	BOP1/FBXW9/PES1/LAS1L/ZNF593/WDR12/EIF6/RPF1/MRTO4/RRP1/RRP1B/WDR37/WDR74/RRP15/FTSJ3/EBNA1BP2/RRS1/NIP7
GO_REGULATION_OF_TRANSLATIONAL_TERMINATION	GO_REGULATION_OF_TRANSLATIONAL_TERMINATION	GO_REGULATION_OF_TRANSLATIONAL_TERMINATION	10	-0.756888	-1.49479	0.0271186	0.166346	4311	tags=80%, list=22%, signal=62%	EIF5A/GSPT1/GLE1/MTRF1/EIF5A2/JMJD4/ETF1/OGFOD1
GO_MITOCHONDRIAL_RNA_PROCESSING	GO_MITOCHONDRIAL_RNA_PROCESSING	GO_MITOCHONDRIAL_RNA_PROCESSING	15	-0.756721	-1.62508	0.0101868	0.0978487	3052	tags=80%, list=16%, signal=67%	TRMT10B/HSD17B10/PNPT1/TBRG4/FASTKD5/ELAC2/SUPV3L1/CDK5RAP1/TRNT1/TRMT61B/TRMT10C/PUS1
GO_POSITIVE_REGULATION_OF_MITOCHONDRIAL_TRANSLATION	GO_POSITIVE_REGULATION_OF_MITOCHONDRIAL_TRANSLATION	GO_POSITIVE_REGULATION_OF_MITOCHONDRIAL_TRANSLATION	17	-0.754871	-1.66877	0.00336134	0.0810766	2197	tags=59%, list=11%, signal=52%	MPV17L2/C1QBP/TRUB2/RPUSD3/CDK5RAP1/FASTKD3/COA3/UQCC1/FASTKD2/TRMT10C
GO_SPLICEOSOMAL_SNRNP_ASSEMBLY	GO_SPLICEOSOMAL_SNRNP_ASSEMBLY	GO_SPLICEOSOMAL_SNRNP_ASSEMBLY	33	-0.754088	-1.92517	0.00158228	0.0810766	3580	tags=61%, list=19%, signal=49%	SNRPF/GEMIN2/COIL/SNRPG/PRMT5/DDX20/SNRPD1/SRSF10/SNRPC/SNUPN/PRPF19/SNRPB/AAR2/PRPF31/WDR77/GEMIN5/PRMT7/GEMIN6/CD2BP2/GEMIN4
GO_PROTON_TRANSPORTING_ATP_SYNTHASE_COMPLEX_COUPLING_FACTOR_F_O	GO_PROTON_TRANSPORTING_ATP_SYNTHASE_COMPLEX_COUPLING_FACTOR_F_O	GO_PROTON_TRANSPORTING_ATP_SYNTHASE_COMPLEX_COUPLING_FACTOR_F_O	10	-0.753849	-1.48879	0.0322034	0.181253	3455	tags=80%, list=18%, signal=66%	ATP5PB/DMAC2L/ATP5ME/ATP5MC3/ATP5PF/ATP5MF/ATP5MC1/ATP5PD
GO_CARGO_ADAPTOR_ACTIVITY	GO_CARGO_ADAPTOR_ACTIVITY	GO_CARGO_ADAPTOR_ACTIVITY	10	-0.752692	-1.4865	0.0372881	0.194686	2480	tags=50%, list=13%, signal=44%	DAB2/AP2S1/HIP1R/ARRB1/LDLRAP1
GO_RRNA_CONTAINING_RIBONUCLEOPROTEIN_COMPLEX_EXPORT_FROM_NUCLEUS	GO_RRNA_CONTAINING_RIBONUCLEOPROTEIN_COMPLEX_EXPORT_FROM_NUCLEUS	GO_RRNA_CONTAINING_RIBONUCLEOPROTEIN_COMPLEX_EXPORT_FROM_NUCLEUS	14	-0.752557	-1.57779	0.0101351	0.0978487	4045	tags=86%, list=21%, signal=68%	RAN/RPS15/NUP88/NMD3/ZNF593/TSC1/EIF6/XPO1/ABCE1/SDAD1/RRS1/LTV1
GO_POSITIVE_REGULATION_OF_RNA_POLYMERASE_II_TRANSCRIPTIONAL_PREINITIATION_COMPLEX_ASSEMBLY	GO_POSITIVE_REGULATION_OF_RNA_POLYMERASE_II_TRANSCRIPTIONAL_PREINITIATION_COMPLEX_ASSEMBLY	GO_POSITIVE_REGULATION_OF_RNA_POLYMERASE_II_TRANSCRIPTIONAL_PREINITIATION_COMPLEX_ASSEMBLY	10	-0.752342	-1.48581	0.0372881	0.194686	975	tags=40%, list=5%, signal=38%	PSMC4/PSMC5/PSMC3/PSMC2
GO_POSITIVE_REGULATION_OF_SEQUESTERING_OF_CALCIUM_ION	GO_POSITIVE_REGULATION_OF_SEQUESTERING_OF_CALCIUM_ION	GO_POSITIVE_REGULATION_OF_SEQUESTERING_OF_CALCIUM_ION	13	-0.75218	-1.54411	0.0171821	0.128684	2650	tags=38%, list=14%, signal=33%	CALM2/GSTO1/PKD2/NTSR1/CALM1
GO_5S_RRNA_BINDING	GO_5S_RRNA_BINDING	GO_5S_RRNA_BINDING	11	-0.751504	-1.50874	0.0288625	0.173165	933	tags=27%, list=5%, signal=26%	MRPL18/RRS1/TST
GO_REGULATION_OF_HELICASE_ACTIVITY	GO_REGULATION_OF_HELICASE_ACTIVITY	GO_REGULATION_OF_HELICASE_ACTIVITY	11	-0.75002	-1.50576	0.0288625	0.173165	2681	tags=55%, list=14%, signal=47%	MSH6/CHTOP/SIRT1/SSBP1/GTF2H2/IFIT1
GO_GLYCEROL_ETHER_METABOLIC_PROCESS	GO_GLYCEROL_ETHER_METABOLIC_PROCESS	GO_GLYCEROL_ETHER_METABOLIC_PROCESS	10	-0.749098	-1.4794	0.0389831	0.199374	2518	tags=60%, list=13%, signal=52%	TMEM86B/PEX7/GNPAT/TXN/DHRS7B/FAR1
GO_SNORNA_BINDING	GO_SNORNA_BINDING	GO_SNORNA_BINDING	26	-0.748421	-1.82808	0.00158479	0.0810766	2564	tags=65%, list=13%, signal=57%	NUDT16/NOP10/NUDT5/RRP9/DDX21/UTP6/SNU13/BMS1/NOP58/IMP4/GAR1/BYSL/NOLC1/IMP3/DKC1/NOP56/NUFIP1
GO_NADPH_BINDING	GO_NADPH_BINDING	GO_NADPH_BINDING	14	-0.74778	-1.56777	0.0118243	0.105291	3651	tags=64%, list=19%, signal=52%	GRHPR/DECR1/KCNAB1/QDPR/DHFR/LBR/MTRR/TP53I3/DUS2
GO_PROTEIN_IMPORT_INTO_MITOCHONDRIAL_MATRIX	GO_PROTEIN_IMPORT_INTO_MITOCHONDRIAL_MATRIX	GO_PROTEIN_IMPORT_INTO_MITOCHONDRIAL_MATRIX	13	-0.747758	-1.53503	0.0206186	0.142759	1065	tags=38%, list=6%, signal=36%	TIMM44/TOMM40L/TIMM21/TOMM40/TIMM23
GO_SULFUR_AMINO_ACID_CATABOLIC_PROCESS	GO_SULFUR_AMINO_ACID_CATABOLIC_PROCESS	GO_SULFUR_AMINO_ACID_CATABOLIC_PROCESS	12	-0.747717	-1.53273	0.0220339	0.147243	1646	tags=42%, list=9%, signal=38%	CSAD/CTH/MTRR/ADO/TST
GO_PROTOPORPHYRINOGEN_IX_METABOLIC_PROCESS	GO_PROTOPORPHYRINOGEN_IX_METABOLIC_PROCESS	GO_PROTOPORPHYRINOGEN_IX_METABOLIC_PROCESS	10	-0.747489	-1.47623	0.040678	0.204577	4091	tags=80%, list=21%, signal=63%	PPOX/EIF2AK1/FECH/ALAS1/UROD/UROS/CPOX/HMBS
GO_RNA_METHYLTRANSFERASE_ACTIVITY	GO_RNA_METHYLTRANSFERASE_ACTIVITY	GO_RNA_METHYLTRANSFERASE_ACTIVITY	54	-0.7472	-2.06001	0.0015015	0.0810766	3167	tags=59%, list=16%, signal=50%	TRMT2B/TRMT10B/ALKBH8/METTL6/TRMT2A/WDR4/RAMAC/TRMT6/TRMO/CMTR2/THUMPD3/TRMT44/NSUN6/TFB2M/CMTR1/MRM1/TRDMT1/METTL3/EMG1/TRMT1L/METTL2A/TRMT61A/TRMT61B/FTSJ3/NSUN2/TRMT10C/MRM3/NOP2/METTL1/LCMT2/DIMT1/BCDIN3D
GO_PROTEASOMAL_UBIQUITIN_INDEPENDENT_PROTEIN_CATABOLIC_PROCESS	GO_PROTEASOMAL_UBIQUITIN_INDEPENDENT_PROTEIN_CATABOLIC_PROCESS	GO_PROTEASOMAL_UBIQUITIN_INDEPENDENT_PROTEIN_CATABOLIC_PROCESS	21	-0.746964	-1.71883	0.00331675	0.0810766	3385	tags=67%, list=18%, signal=55%	PSMB7/PSMB10/PSMB4/PSMB2/PSMA2/ENC1/PSMB3/PSMA4/PSMB5/PSMB1/PSMA3/PSMB6/PSMB9/PSMA5
GO_POSITIVE_REGULATION_OF_CHOLESTEROL_METABOLIC_PROCESS	GO_POSITIVE_REGULATION_OF_CHOLESTEROL_METABOLIC_PROCESS	GO_POSITIVE_REGULATION_OF_CHOLESTEROL_METABOLIC_PROCESS	10	-0.746633	-1.47453	0.040678	0.204577	1711	tags=40%, list=9%, signal=36%	FGF1/SREBF1/LDLRAP1/PRKAA1
GO_TRNA_METHYLATION	GO_TRNA_METHYLATION	GO_TRNA_METHYLATION	33	-0.745519	-1.9033	0.00158228	0.0810766	3052	tags=64%, list=16%, signal=54%	TRMT10B/HSD17B10/ALKBH8/METTL6/WDR4/TRMT6/TRMO/GTPBP3/THUMPD3/TRMT44/NSUN6/TRDMT1/TRMT1L/METTL2A/TRMT61A/TRMT61B/NSUN2/TRMT10C/METTL1/LCMT2/BCDIN3D
GO_PROTEASOME_REGULATORY_PARTICLE_BASE_SUBCOMPLEX	GO_PROTEASOME_REGULATORY_PARTICLE_BASE_SUBCOMPLEX	GO_PROTEASOME_REGULATORY_PARTICLE_BASE_SUBCOMPLEX	11	-0.744825	-1.49533	0.0322581	0.181253	3099	tags=73%, list=16%, signal=61%	PSMC4/PSMD9/PSMD1/PSMD4/PSMC5/PSMC3/PSMC1/PSMC2
GO_MATURATION_OF_5_8S_RRNA_FROM_TRICISTRONIC_RRNA_TRANSCRIPT_SSU_RRNA_5_8S_RRNA_LSU_RRNA	GO_MATURATION_OF_5_8S_RRNA_FROM_TRICISTRONIC_RRNA_TRANSCRIPT_SSU_RRNA_5_8S_RRNA_LSU_RRNA	GO_MATURATION_OF_5_8S_RRNA_FROM_TRICISTRONIC_RRNA_TRANSCRIPT_SSU_RRNA_5_8S_RRNA_LSU_RRNA	20	-0.743646	-1.69003	0.0033389	0.0810766	3339	tags=70%, list=17%, signal=58%	ERI1/BOP1/ERI3/PES1/NOL9/EXOSC9/WDR12/EXOSC3/EXOSC10/FTSJ3/KRI1/RRS1/EXOSC2/RCL1
GO_NUCLEOLAR_LARGE_RRNA_TRANSCRIPTION_BY_RNA_POLYMERASE_I	GO_NUCLEOLAR_LARGE_RRNA_TRANSCRIPTION_BY_RNA_POLYMERASE_I	GO_NUCLEOLAR_LARGE_RRNA_TRANSCRIPTION_BY_RNA_POLYMERASE_I	13	-0.743607	-1.52651	0.024055	0.156548	1697	tags=46%, list=9%, signal=42%	DDX11/TCOF1/NCL/MTOR/PWP1/NOL11
GO_MATURATION_OF_5_8S_RRNA	GO_MATURATION_OF_5_8S_RRNA	GO_MATURATION_OF_5_8S_RRNA	25	-0.743201	-1.80276	0.00156986	0.0810766	3339	tags=60%, list=17%, signal=50%	ERI3/PES1/LAS1L/NOL9/EXOSC9/WDR12/MPHOSPH6/EXOSC3/EXOSC10/FTSJ3/KRI1/EXOSC4/RRS1/EXOSC2/RCL1
GO_MITOTIC_SPINDLE_MIDZONE	GO_MITOTIC_SPINDLE_MIDZONE	GO_MITOTIC_SPINDLE_MIDZONE	12	-0.742899	-1.52285	0.0288136	0.173165	2245	tags=50%, list=12%, signal=44%	KIF18B/CTTN/CENPE/KIF18A/HNRNPU/RCC2
GO_MATURATION_OF_SSU_RRNA_FROM_TRICISTRONIC_RRNA_TRANSCRIPT_SSU_RRNA_5_8S_RRNA_LSU_RRNA	GO_MATURATION_OF_SSU_RRNA_FROM_TRICISTRONIC_RRNA_TRANSCRIPT_SSU_RRNA_5_8S_RRNA_LSU_RRNA	GO_MATURATION_OF_SSU_RRNA_FROM_TRICISTRONIC_RRNA_TRANSCRIPT_SSU_RRNA_5_8S_RRNA_LSU_RRNA	33	-0.742051	-1.89445	0.00158228	0.0810766	3258	tags=73%, list=17%, signal=61%	GTF2H5/RPS19/DCAF13/RPS16/TBL3/HEATR1/TSR2/WDR46/UTP23/ERCC2/PWP2/BTRC/DHX37/UTP6/BMS1/MRPS11/UTP3/BYSL/NGDN/UTP4/KRI1/RRP36/RRS1/RCL1
GO_LIPID_GLYCOSYLATION	GO_LIPID_GLYCOSYLATION	GO_LIPID_GLYCOSYLATION	11	-0.738818	-1.48327	0.0339559	0.185497	2561	tags=45%, list=13%, signal=39%	GBA/GBA2/ST3GAL2/SLC35C1/B4GALNT1
GO_ENDORIBONUCLEASE_ACTIVITY_PRODUCING_5_PHOSPHOMONOESTERS	GO_ENDORIBONUCLEASE_ACTIVITY_PRODUCING_5_PHOSPHOMONOESTERS	GO_ENDORIBONUCLEASE_ACTIVITY_PRODUCING_5_PHOSPHOMONOESTERS	23	-0.738113	-1.74464	0.00164745	0.0810766	3071	tags=57%, list=16%, signal=48%	DROSHA/POP7/NUDT16/RNASEH1/DBR1/RPP25/DICER1/RPP38/POP5/RPP40/POP1/FEN1/DGCR8
GO_SPLICEOSOMAL_TRI_SNRNP_COMPLEX_ASSEMBLY	GO_SPLICEOSOMAL_TRI_SNRNP_COMPLEX_ASSEMBLY	GO_SPLICEOSOMAL_TRI_SNRNP_COMPLEX_ASSEMBLY	12	-0.737678	-1.51215	0.0305085	0.177024	2938	tags=50%, list=15%, signal=42%	DDX20/SRSF10/PRPF19/AAR2/PRPF31/CD2BP2
GO_SMALL_NUCLEOLAR_RIBONUCLEOPROTEIN_COMPLEX	GO_SMALL_NUCLEOLAR_RIBONUCLEOPROTEIN_COMPLEX	GO_SMALL_NUCLEOLAR_RIBONUCLEOPROTEIN_COMPLEX	24	-0.736692	-1.76381	0.0016	0.0810766	1713	tags=54%, list=9%, signal=49%	NOP10/RRP9/RPP25/SNU13/SNRNP40/NOP58/GAR1/NOLC1/POP5/MPHOSPH10/POP1/DKC1/NOP56
GO_REGULATION_OF_RIBOSOME_BIOGENESIS	GO_REGULATION_OF_RIBOSOME_BIOGENESIS	GO_REGULATION_OF_RIBOSOME_BIOGENESIS	13	-0.736637	-1.5122	0.024055	0.156548	3067	tags=62%, list=16%, signal=52%	WDR43/HEATR1/NUDT16/WDR75/MALSU1/UTP15/RIOK1/DIMT1
GO_MITOCHONDRIAL_TRNA_PROCESSING	GO_MITOCHONDRIAL_TRNA_PROCESSING	GO_MITOCHONDRIAL_TRNA_PROCESSING	11	-0.735783	-1.47717	0.0356537	0.190975	3052	tags=91%, list=16%, signal=77%	TRMT5/TRIT1/TRMT10B/HSD17B10/ELAC2/CDK5RAP1/TRNT1/TRMT61B/TRMT10C/PUS1
GO_PEPTIDYL_ARGININE_METHYLATION	GO_PEPTIDYL_ARGININE_METHYLATION	GO_PEPTIDYL_ARGININE_METHYLATION	15	-0.733913	-1.57609	0.0186757	0.135619	970	tags=67%, list=5%, signal=63%	PRMT2/NDUFAF7/PRMT1/PRMT9/PRMT5/COPRS/PRMT7/PRMT3/PRDM4/PRMT6
GO_KINETOCHORE_ASSEMBLY	GO_KINETOCHORE_ASSEMBLY	GO_KINETOCHORE_ASSEMBLY	15	-0.733841	-1.57594	0.0186757	0.135619	2262	tags=60%, list=12%, signal=53%	CENPK/CENPC/CENPF/CENPT/CENPX/RNF4/MIS12/CENPE/TRAPPC12
GO_MITOCHONDRIAL_DNA_REPLICATION	GO_MITOCHONDRIAL_DNA_REPLICATION	GO_MITOCHONDRIAL_DNA_REPLICATION	12	-0.732047	-1.50061	0.0372881	0.194686	2598	tags=58%, list=14%, signal=50%	PRIMPOL/SSBP1/LIG3/STOML2/DNAJA3/MGME1/TWNK
GO_PHOSPHORYLATION_OF_RNA_POLYMERASE_II_C_TERMINAL_DOMAIN	GO_PHOSPHORYLATION_OF_RNA_POLYMERASE_II_C_TERMINAL_DOMAIN	GO_PHOSPHORYLATION_OF_RNA_POLYMERASE_II_C_TERMINAL_DOMAIN	11	-0.73144	-1.46846	0.040747	0.204577	4094	tags=73%, list=21%, signal=57%	GTF2H3/GTF2H5/CDK12/CCNH/CDK9/GTF2H4/CDK13/GTF2H1
GO_CYTIDINE_TO_URIDINE_EDITING	GO_CYTIDINE_TO_URIDINE_EDITING	GO_CYTIDINE_TO_URIDINE_EDITING	11	-0.731323	-1.46822	0.040747	0.204577	1807	tags=27%, list=9%, signal=25%	APOBEC3F/RBM47/APOBEC3H
GO_CATALYTIC_ACTIVITY_ACTING_ON_A_TRNA	GO_CATALYTIC_ACTIVITY_ACTING_ON_A_TRNA	GO_CATALYTIC_ACTIVITY_ACTING_ON_A_TRNA	87	-0.731234	-2.14853	0.00144092	0.0810766	3167	tags=53%, list=16%, signal=44%	TRMT2B/TSEN15/DUS4L/TRMT10B/POP7/ALKBH8/METTL6/NT5C3A/WDR4/AARS2/TRMT6/TRMO/TYW1B/LARS2/ELAC2/YARS2/FARSA/THUMPD3/TRMT44/NSUN6/RPP25/FARS2/PTRH2/TRDMT1/MTFMT/DUS3L/TRNT1/PTRH1/MRPL58/TRMT1L/METTL2A/TRMT61A/RPP38/POP5/TRMT61B/RPP40/POP1/NSUN2/TRMT10C/METTL1/DUS2/LCMT2/PUS1/MARS2/QTRT2/BCDIN3D
GO_MRNA_MODIFICATION	GO_MRNA_MODIFICATION	GO_MRNA_MODIFICATION	22	-0.73104	-1.70739	0.00328947	0.0810766	2469	tags=55%, list=13%, signal=48%	TRUB1/TRMT6/VIRMA/CMTR2/CMTR1/PUS7/METTL3/TRMT61A/TRMT61B/DKC1/TRMT10C/PUS1
GO_RNA_POLYMERASE_II_GENERAL_TRANSCRIPTION_INITIATION_FACTOR_ACTIVITY	GO_RNA_POLYMERASE_II_GENERAL_TRANSCRIPTION_INITIATION_FACTOR_ACTIVITY	GO_RNA_POLYMERASE_II_GENERAL_TRANSCRIPTION_INITIATION_FACTOR_ACTIVITY	12	-0.730986	-1.49844	0.0389831	0.199374	2170	tags=67%, list=11%, signal=59%	GTF2H3/TAF1/GTF2H4/TAF5/GTF2A2/GTF2E1/GTF2H2/TBP
GO_REGULATION_OF_DNA_DAMAGE_CHECKPOINT	GO_REGULATION_OF_DNA_DAMAGE_CHECKPOINT	GO_REGULATION_OF_DNA_DAMAGE_CHECKPOINT	16	-0.730809	-1.59886	0.0201681	0.141986	2629	tags=56%, list=14%, signal=49%	CHEK2/THOC1/CCAR2/THOC5/RFWD3/CUL4A/RPA2/CRY1/PPP1R10
GO_ATTACHMENT_OF_MITOTIC_SPINDLE_MICROTUBULES_TO_KINETOCHORE	GO_ATTACHMENT_OF_MITOTIC_SPINDLE_MICROTUBULES_TO_KINETOCHORE	GO_ATTACHMENT_OF_MITOTIC_SPINDLE_MICROTUBULES_TO_KINETOCHORE	12	-0.729922	-1.49625	0.0389831	0.199374	3724	tags=67%, list=19%, signal=54%	MAD1L1/NUF2/CENPC/MIS12/CENPE/HNRNPU/SEH1L/CHAMP1
GO_TRANSCRIPTION_INITIATION_FROM_RNA_POLYMERASE_III_PROMOTER	GO_TRANSCRIPTION_INITIATION_FROM_RNA_POLYMERASE_III_PROMOTER	GO_TRANSCRIPTION_INITIATION_FROM_RNA_POLYMERASE_III_PROMOTER	12	-0.729421	-1.49523	0.0389831	0.199374	3943	tags=58%, list=20%, signal=46%	GTF3C3/GTF3C5/GTF3C1/SNAPC5/BRF1/POLR3H/TBP
GO_NEGATIVE_REGULATION_OF_TELOMERE_MAINTENANCE_VIA_TELOMERASE	GO_NEGATIVE_REGULATION_OF_TELOMERE_MAINTENANCE_VIA_TELOMERASE	GO_NEGATIVE_REGULATION_OF_TELOMERE_MAINTENANCE_VIA_TELOMERASE	17	-0.728675	-1.61086	0.010084	0.0978487	3079	tags=71%, list=16%, signal=59%	DCP2/NAT10/PINX1/ACD/HNRNPA1/STN1/TERF2/XRN1/TERF1/HNRNPU/EXOSC10/CTC1
GO_ETHER_METABOLIC_PROCESS	GO_ETHER_METABOLIC_PROCESS	GO_ETHER_METABOLIC_PROCESS	14	-0.727822	-1.52593	0.0219595	0.14704	2518	tags=43%, list=13%, signal=37%	TMEM86B/PEX7/GNPAT/TXN/DHRS7B/FAR1
GO_PRE_MIRNA_PROCESSING	GO_PRE_MIRNA_PROCESSING	GO_PRE_MIRNA_PROCESSING	15	-0.727042	-1.56134	0.0203735	0.141986	3443	tags=53%, list=18%, signal=44%	LIN28B/DROSHA/ADAR/TARBP2/TUT7/TUT4/DICER1/BCDIN3D
GO_MRNA_CLEAVAGE_INVOLVED_IN_MRNA_PROCESSING	GO_MRNA_CLEAVAGE_INVOLVED_IN_MRNA_PROCESSING	GO_MRNA_CLEAVAGE_INVOLVED_IN_MRNA_PROCESSING	13	-0.726377	-1.49114	0.0292096	0.173685	1578	tags=38%, list=8%, signal=35%	NUDT21/CSTF2T/CPSF6/CSTF2/CPSF4
GO_DNA_REPLICATION_INITIATION	GO_DNA_REPLICATION_INITIATION	GO_DNA_REPLICATION_INITIATION	34	-0.72617	-1.85774	0.00158228	0.0810766	2344	tags=53%, list=12%, signal=47%	ORC4/MCM5/TICRR/MCM4/MCM10/CCNE1/MCM7/MCM3/WDR18/CCNE2/ORC2/ORC6/POLA2/MCM6/LRWD1/ORC5/POLE3/POLE2
GO_FANCONI_ANAEMIA_NUCLEAR_COMPLEX	GO_FANCONI_ANAEMIA_NUCLEAR_COMPLEX	GO_FANCONI_ANAEMIA_NUCLEAR_COMPLEX	11	-0.726095	-1.45772	0.0441426	0.215057	3246	tags=64%, list=17%, signal=53%	FANCG/FANCB/CENPX/FANCC/FANCE/FANCL/FAAP100
GO_DNA_UNWINDING_INVOLVED_IN_DNA_REPLICATION	GO_DNA_UNWINDING_INVOLVED_IN_DNA_REPLICATION	GO_DNA_UNWINDING_INVOLVED_IN_DNA_REPLICATION	15	-0.72584	-1.55876	0.0203735	0.141986	2391	tags=60%, list=12%, signal=53%	RPA1/SSBP1/MCM4/WRN/RECQL5/MCM7/MCM6/BLM/TWNK
GO_POSITIVE_REGULATION_OF_CENTROSOME_CYCLE	GO_POSITIVE_REGULATION_OF_CENTROSOME_CYCLE	GO_POSITIVE_REGULATION_OF_CENTROSOME_CYCLE	12	-0.725582	-1.48736	0.040678	0.204577	3698	tags=67%, list=19%, signal=54%	ROCK2/RANBP1/VPS4B/CEP295/POC1A/NUP62/PLK4/NSFL1C
GO_LATE_ENDOSOME_TO_VACUOLE_TRANSPORT	GO_LATE_ENDOSOME_TO_VACUOLE_TRANSPORT	GO_LATE_ENDOSOME_TO_VACUOLE_TRANSPORT	13	-0.724811	-1.48793	0.0309278	0.177044	2097	tags=38%, list=11%, signal=34%	CHMP1A/PIK3R4/VPS25/LEPROTL1/TMEM50B
GO_NUCLEAR_EXOSOME_RNASE_COMPLEX	GO_NUCLEAR_EXOSOME_RNASE_COMPLEX	GO_NUCLEAR_EXOSOME_RNASE_COMPLEX	15	-0.724037	-1.55489	0.0203735	0.141986	2870	tags=47%, list=15%, signal=40%	EXOSC9/MPHOSPH6/EXOSC3/EXOSC10/WDR74/EXOSC4/EXOSC2
GO_DNA_HELICASE_COMPLEX	GO_DNA_HELICASE_COMPLEX	GO_DNA_HELICASE_COMPLEX	15	-0.723203	-1.55309	0.0203735	0.141986	2821	tags=53%, list=15%, signal=46%	INO80C/NFRKB/ACTL6A/ACTR5/UCHL5/MCRS1/RUVBL1/INO80
GO_PRERIBOSOME	GO_PRERIBOSOME	GO_PRERIBOSOME	69	-0.723127	-2.04931	0.00148588	0.0810766	3300	tags=72%, list=17%, signal=60%	KRR1/DCAF13/SRFBP1/PES1/LAS1L/NOL6/TBL3/ZNF593/HEATR1/NOC4L/WDR12/WDR46/EIF6/UTP11/RRP9/UTP23/PWP2/BTRC/RPF1/MRTO4/UTP14C/UTP6/RRP1/SNU13/MRPL1/BMS1/UTP3/RRP1B/NOP58/EMG1/UTP14A/WDR37/IMP4/BYSL/MPHOSPH10/WDR74/NGDN/UTP4/IMP3/RRP15/FTSJ3/KRI1/RRP7A/EBNA1BP2/RRP36/NOP56/RRS1/RIOK1/LTV1/NIP7
GO_ERYTHROCYTE_MATURATION	GO_ERYTHROCYTE_MATURATION	GO_ERYTHROCYTE_MATURATION	14	-0.721878	-1.51347	0.0253378	0.160044	1597	tags=29%, list=8%, signal=26%	HBZ/ERCC2/MAEA/KLF2
GO_INTRINSIC_COMPONENT_OF_PEROXISOMAL_MEMBRANE	GO_INTRINSIC_COMPONENT_OF_PEROXISOMAL_MEMBRANE	GO_INTRINSIC_COMPONENT_OF_PEROXISOMAL_MEMBRANE	14	-0.719545	-1.50857	0.027027	0.16596	3417	tags=50%, list=18%, signal=41%	ABCD1/SLC27A2/PEX16/PEX11A/PEX11B/PEX11G/FAR1
GO_PHOSPHOLIPID_HOMEOSTASIS	GO_PHOSPHOLIPID_HOMEOSTASIS	GO_PHOSPHOLIPID_HOMEOSTASIS	12	-0.719515	-1.47492	0.0440678	0.214875	962	tags=25%, list=5%, signal=24%	ABCA1/TLCD1/GPAM
GO_MITOCHONDRIAL_SMALL_RIBOSOMAL_SUBUNIT	GO_MITOCHONDRIAL_SMALL_RIBOSOMAL_SUBUNIT	GO_MITOCHONDRIAL_SMALL_RIBOSOMAL_SUBUNIT	26	-0.718011	-1.7538	0.00158479	0.0810766	2545	tags=65%, list=13%, signal=57%	MRPS21/MRPS18B/MRPS15/MRPS36/MRPS22/MRPS12/MRPS9/MRPS18C/MRPS28/MRPS10/MRPS14/MRPS18A/MRPS11/MRPS7/MRPS17/MRPS26/MRPS31
GO_REGULATION_OF_MITOCHONDRIAL_GENE_EXPRESSION	GO_REGULATION_OF_MITOCHONDRIAL_GENE_EXPRESSION	GO_REGULATION_OF_MITOCHONDRIAL_GENE_EXPRESSION	27	-0.717707	-1.7559	0.00322061	0.0810766	2197	tags=48%, list=11%, signal=43%	MPV17L2/C1QBP/TRUB2/RPUSD3/CDK5RAP1/MALSU1/TSFM/FASTKD3/COA3/PRKAA1/UQCC1/FASTKD2/TRMT10C
GO_PROTEIN_LOCALIZATION_TO_NUCLEOLUS	GO_PROTEIN_LOCALIZATION_TO_NUCLEOLUS	GO_PROTEIN_LOCALIZATION_TO_NUCLEOLUS	15	-0.716211	-1.53808	0.0254669	0.16014	3050	tags=47%, list=16%, signal=39%	NMD3/PINX1/WRN/MCRS1/BYSL/NOL8/RRS1
GO_GENERAL_TRANSCRIPTION_INITIATION_FACTOR_ACTIVITY	GO_GENERAL_TRANSCRIPTION_INITIATION_FACTOR_ACTIVITY	GO_GENERAL_TRANSCRIPTION_INITIATION_FACTOR_ACTIVITY	18	-0.714337	-1.60285	0.00822368	0.0912215	4094	tags=72%, list=21%, signal=57%	GTF2H3/TAF1/GTF3C3/GTF3C5/GTF3C1/GTF2H4/TAF5/GTF2A2/GTF2E1/GTF2H2/RRN3/GTF3C2/TBP
GO_CONDENSED_NUCLEAR_CHROMOSOME_KINETOCHORE	GO_CONDENSED_NUCLEAR_CHROMOSOME_KINETOCHORE	GO_CONDENSED_NUCLEAR_CHROMOSOME_KINETOCHORE	14	-0.714119	-1.4972	0.027027	0.16596	4102	tags=57%, list=21%, signal=45%	CENPK/BUB1B/NUF2/CENPC/CENPO/MIS12/MIS18BP1/CCNB1
GO_THREONINE_TYPE_PEPTIDASE_ACTIVITY	GO_THREONINE_TYPE_PEPTIDASE_ACTIVITY	GO_THREONINE_TYPE_PEPTIDASE_ACTIVITY	20	-0.713683	-1.62193	0.0066778	0.0870899	3385	tags=65%, list=18%, signal=54%	PSMB7/PSMB10/PSMB4/PSMB2/PSMA2/PSMB3/PSMA4/PSMB5/PSMB1/PSMA3/PSMB6/PSMB9/PSMA5
GO_DEOXYRIBOSE_PHOSPHATE_CATABOLIC_PROCESS	GO_DEOXYRIBOSE_PHOSPHATE_CATABOLIC_PROCESS	GO_DEOXYRIBOSE_PHOSPHATE_CATABOLIC_PROCESS	16	-0.712422	-1.55863	0.0201681	0.141986	2715	tags=50%, list=14%, signal=43%	OGG1/NUDT16/NEIL2/NT5C/DCTPP1/UNG/NTHL1/TDG
GO_DNA_DEMETHYLATION	GO_DNA_DEMETHYLATION	GO_DNA_DEMETHYLATION	24	-0.711853	-1.70434	0.0016	0.0810766	2454	tags=33%, list=13%, signal=29%	ALKBH1/OTUD4/USP9X/APOBEC3F/ALKBH2/APOBEC3H/ALKBH4/TDG
GO_CYTOPLASMIC_EXOSOME_RNASE_COMPLEX	GO_CYTOPLASMIC_EXOSOME_RNASE_COMPLEX	GO_CYTOPLASMIC_EXOSOME_RNASE_COMPLEX	13	-0.710644	-1.45884	0.0429553	0.211755	2894	tags=54%, list=15%, signal=46%	PNPT1/EXOSC9/SUPV3L1/EXOSC3/EXOSC4/DIS3L/EXOSC2
GO_PYRIMIDINE_DEOXYRIBONUCLEOTIDE_METABOLIC_PROCESS	GO_PYRIMIDINE_DEOXYRIBONUCLEOTIDE_METABOLIC_PROCESS	GO_PYRIMIDINE_DEOXYRIBONUCLEOTIDE_METABOLIC_PROCESS	17	-0.709127	-1.56764	0.0168067	0.128355	2715	tags=53%, list=14%, signal=46%	OGG1/DTYMK/NEIL2/NT5C/DCTPP1/UNG/SHMT1/NTHL1/TDG
GO_TRNA_PROCESSING	GO_TRNA_PROCESSING	GO_TRNA_PROCESSING	112	-0.707455	-2.14715	0.00137931	0.0810766	3182	tags=58%, list=17%, signal=49%	ELP1/ELP2/TRMT2B/TSEN15/DUS4L/ADAT2/NAT10/TRMT10B/POP7/HSD17B10/SSB/ALKBH8/METTL6/RTCB/TRUB1/WDR4/AARS2/TRMT6/TRMO/ZBTB8OS/TYW1B/GTPBP3/ELAC2/THUMPD3/TRMT44/KTI12/NSUN6/TRMU/POLR3K/RPP25/CTU2/FARS2/ELP3/PUS7/CDK5RAP1/TRDMT1/MTFMT/DUS3L/CLP1/TRNT1/DDX1/SEPHS2/TRMT1L/METTL2A/TRMT61A/RPP38/POP5/TRMT61B/TP53RK/RPP40/CSTF2/GRSF1/POP1/OSGEPL1/ELP6/ANKRD16/NSUN2/TRMT10C/CPSF4/METTL1/DUS2/LCMT2/PUS1/QTRT…
GO_SINGLE_STRANDED_DNA_HELICASE_ACTIVITY	GO_SINGLE_STRANDED_DNA_HELICASE_ACTIVITY	GO_SINGLE_STRANDED_DNA_HELICASE_ACTIVITY	17	-0.703929	-1.55615	0.0201681	0.141986	5149	tags=94%, list=27%, signal=69%	MCM2/DSCC1/PIF1/RFC3/POLQ/DNA2/HELB/CHTF18/DHX9/CHTF8/MCM5/RFC5/RFC4/RFC2/MCM7/MCM6
GO_MATURATION_OF_LSU_RRNA_FROM_TRICISTRONIC_RRNA_TRANSCRIPT_SSU_RRNA_5_8S_RRNA_LSU_RRNA	GO_MATURATION_OF_LSU_RRNA_FROM_TRICISTRONIC_RRNA_TRANSCRIPT_SSU_RRNA_5_8S_RRNA_LSU_RRNA	GO_MATURATION_OF_LSU_RRNA_FROM_TRICISTRONIC_RRNA_TRANSCRIPT_SSU_RRNA_5_8S_RRNA_LSU_RRNA	13	-0.703732	-1.44465	0.04811	0.226712	3164	tags=69%, list=16%, signal=58%	BOP1/PES1/NOL9/WDR12/RPL7L1/DDX18/GTPBP4/FTSJ3/ZNHIT6
GO_TRNA_MODIFICATION	GO_TRNA_MODIFICATION	GO_TRNA_MODIFICATION	78	-0.703112	-2.02948	0.00144092	0.0810766	3292	tags=58%, list=17%, signal=48%	ELP5/ELP1/ELP2/DUS4L/ADAT2/NAT10/TRMT10B/HSD17B10/SSB/ALKBH8/METTL6/TRUB1/WDR4/AARS2/TRMT6/TRMO/GTPBP3/THUMPD3/TRMT44/KTI12/NSUN6/TRMU/CTU2/ELP3/PUS7/CDK5RAP1/TRDMT1/MTFMT/DUS3L/SEPHS2/TRMT1L/METTL2A/TRMT61A/TRMT61B/OSGEPL1/ELP6/ANKRD16/NSUN2/TRMT10C/METTL1/DUS2/LCMT2/PUS1/QTRT2/BCDIN3D
GO_TELOMERASE_RNA_BINDING	GO_TELOMERASE_RNA_BINDING	GO_TELOMERASE_RNA_BINDING	19	-0.70101	-1.58354	0.00827815	0.0912215	4134	tags=74%, list=21%, signal=58%	WRAP53/SMG5/TEP1/PARN/DCP2/PINX1/NOP10/DHX36/XRN1/SNRPB/HNRNPU/EXOSC10/GAR1/DKC1
GO_TRNA_METABOLIC_PROCESS	GO_TRNA_METABOLIC_PROCESS	GO_TRNA_METABOLIC_PROCESS	145	-0.70033	-2.19099	0.00131752	0.0810766	3182	tags=52%, list=17%, signal=44%	ELP1/ELP2/TRMT2B/TSEN15/DUS4L/ADAT2/NAT10/TRMT10B/POP7/HSD17B10/SSB/SEPSECS/EXOSC9/ALKBH8/METTL6/RTCB/TRUB1/WDR4/AARS2/TRMT6/TRMO/ZBTB8OS/TYW1B/GTPBP3/LARS2/ELAC2/YARS2/FARSA/THUMPD3/TRMT44/KTI12/EXOSC3/EEF1E1/NSUN6/TRMU/POLR3K/RPP25/CTU2/FARS2/ELP3/PUS7/CDK5RAP1/TRDMT1/MTFMT/DUS3L/CLP1/TRNT1/DDX1/SEPHS2/EXOSC10/TRMT1L/METTL2A/TRMT61A/RPP38/POP5/TRMT61B/TP53RK/RPP40/CSTF2/GRSF1/POP1/OSGEPL1/ELP6/…
GO_TRANSCRIPTIONALLY_ACTIVE_CHROMATIN	GO_TRANSCRIPTIONALLY_ACTIVE_CHROMATIN	GO_TRANSCRIPTIONALLY_ACTIVE_CHROMATIN	19	-0.69957	-1.58029	0.0115894	0.10419	2207	tags=42%, list=11%, signal=37%	AFF4/EXOSC3/ICE2/WDR61/CTR9/EXOSC10/PCID2/EXOSC4
GO_PROTEIN_TRANSMEMBRANE_IMPORT_INTO_INTRACELLULAR_ORGANELLE	GO_PROTEIN_TRANSMEMBRANE_IMPORT_INTO_INTRACELLULAR_ORGANELLE	GO_PROTEIN_TRANSMEMBRANE_IMPORT_INTO_INTRACELLULAR_ORGANELLE	27	-0.698625	-1.70921	0.00322061	0.0810766	3166	tags=41%, list=16%, signal=34%	HSPD1/PEX5/TIMM44/PEX7/PEX16/PEX10/TOMM40L/TIMM21/TOMM40/CHCHD4/TIMM23
GO_CLEAVAGE_INVOLVED_IN_RRNA_PROCESSING	GO_CLEAVAGE_INVOLVED_IN_RRNA_PROCESSING	GO_CLEAVAGE_INVOLVED_IN_RRNA_PROCESSING	21	-0.698353	-1.60697	0.00829187	0.0912215	1680	tags=62%, list=9%, signal=57%	ERI1/BOP1/ERI3/NOL9/EXOSC9/UTP23/EXOSC3/EXOSC10/KRI1/RRP36/RRS1/EXOSC2/RCL1
GO_TELOMERE_MAINTENANCE_VIA_SEMI_CONSERVATIVE_REPLICATION	GO_TELOMERE_MAINTENANCE_VIA_SEMI_CONSERVATIVE_REPLICATION	GO_TELOMERE_MAINTENANCE_VIA_SEMI_CONSERVATIVE_REPLICATION	27	-0.6983	-1.70842	0.00322061	0.0810766	2662	tags=59%, list=14%, signal=51%	RFC3/DNA2/RPA1/POLD2/RPA3/RFC5/RFC4/TERF2/RFC2/RPA2/TERF1/POLA2/PCNA/FEN1/POLE3/POLE2
GO_TRNA_WOBBLE_URIDINE_MODIFICATION	GO_TRNA_WOBBLE_URIDINE_MODIFICATION	GO_TRNA_WOBBLE_URIDINE_MODIFICATION	18	-0.697943	-1.56606	0.0164474	0.127195	3292	tags=56%, list=17%, signal=46%	ELP5/ELP1/ELP2/ALKBH8/GTPBP3/KTI12/TRMU/CTU2/ELP3/ELP6
GO_TELOMERASE_RNA_LOCALIZATION	GO_TELOMERASE_RNA_LOCALIZATION	GO_TELOMERASE_RNA_LOCALIZATION	17	-0.697739	-1.54247	0.0218487	0.146516	5253	tags=82%, list=27%, signal=60%	CCT8/RUVBL2/CCT3/NHP2/WRAP53/PARN/DCP2/TCP1/NOP10/CCT7/CCT2/EXOSC10/RUVBL1/DKC1
GO_GOLGI_TO_VACUOLE_TRANSPORT	GO_GOLGI_TO_VACUOLE_TRANSPORT	GO_GOLGI_TO_VACUOLE_TRANSPORT	13	-0.69684	-1.43051	0.0498282	0.230463	2779	tags=62%, list=14%, signal=53%	AP1G1/CCDC91/GOSR2/GAK/AP4M1/RBSN/VPS54/ANKFY1
GO_4_IRON_4_SULFUR_CLUSTER_BINDING	GO_4_IRON_4_SULFUR_CLUSTER_BINDING	GO_4_IRON_4_SULFUR_CLUSTER_BINDING	39	-0.695634	-1.82396	0.00155763	0.0810766	2195	tags=36%, list=11%, signal=32%	TYW1B/CIAO3/ISCU/NDUFS8/ERCC2/REV3L/ELP3/CDK5RAP1/RSAD1/NDUFS2/CIAPIN1/ISCA2/NTHL1/MOCS1
GO_O_METHYLTRANSFERASE_ACTIVITY	GO_O_METHYLTRANSFERASE_ACTIVITY	GO_O_METHYLTRANSFERASE_ACTIVITY	21	-0.695174	-1.59966	0.00995025	0.0976973	2055	tags=43%, list=11%, signal=38%	COQ3/COMT/CMTR2/CMTR1/MRM1/ICMT/FTSJ3/MRM3/BCDIN3D
GO_RIBOSOMAL_LARGE_SUBUNIT_BIOGENESIS	GO_RIBOSOMAL_LARGE_SUBUNIT_BIOGENESIS	GO_RIBOSOMAL_LARGE_SUBUNIT_BIOGENESIS	64	-0.693421	-1.94998	0.00147929	0.0810766	1591	tags=41%, list=8%, signal=37%	RPL26L1/DHX30/RPL6/MRTO4/SNU13/MRPL1/RPL7L1/DDX18/MALSU1/MRPL20/GTPBP4/WDR74/NOP16/FTSJ3/FASTKD2/BRIX1/EBNA1BP2/SURF6/LTO1/SDAD1/DDX28/RRS1/NOP2/ZNHIT6/NIP7/PAK1IP1
GO_MITOCHONDRIAL_RESPIRATORY_CHAIN_COMPLEX_IV_ASSEMBLY	GO_MITOCHONDRIAL_RESPIRATORY_CHAIN_COMPLEX_IV_ASSEMBLY	GO_MITOCHONDRIAL_RESPIRATORY_CHAIN_COMPLEX_IV_ASSEMBLY	17	-0.693235	-1.53251	0.0218487	0.146516	1704	tags=41%, list=9%, signal=38%	COA1/FASTKD3/TIMM21/COA5/COA3/SCO1/SCO2
GO_PROTEIN_LOCALIZATION_TO_KINETOCHORE	GO_PROTEIN_LOCALIZATION_TO_KINETOCHORE	GO_PROTEIN_LOCALIZATION_TO_KINETOCHORE	16	-0.692677	-1.51544	0.0285714	0.172137	1361	tags=62%, list=7%, signal=58%	HASPIN/TTK/CENPQ/MTBP/MIS12/BUB3/SPDL1/CHAMP1/TRAPPC12/RCC2
GO_DNA_REPLICATION_ORIGIN_BINDING	GO_DNA_REPLICATION_ORIGIN_BINDING	GO_DNA_REPLICATION_ORIGIN_BINDING	24	-0.690375	-1.65292	0.0064	0.0870899	3467	tags=62%, list=18%, signal=51%	MCM8/CDC45/DHX9/HSPD1/ORC4/MCM5/MCM4/MCM10/MCM7/GRWD1/MCM3/ORC2/ORC6/MCM6/ORC5
GO_RESPIRATORY_CHAIN_COMPLEX_IV_ASSEMBLY	GO_RESPIRATORY_CHAIN_COMPLEX_IV_ASSEMBLY	GO_RESPIRATORY_CHAIN_COMPLEX_IV_ASSEMBLY	19	-0.689989	-1.55865	0.013245	0.10947	1704	tags=37%, list=9%, signal=34%	COA1/FASTKD3/TIMM21/COA5/COA3/SCO1/SCO2
GO_MAGNESIUM_DEPENDENT_PROTEIN_SERINE_THREONINE_PHOSPHATASE_ACTIVITY	GO_MAGNESIUM_DEPENDENT_PROTEIN_SERINE_THREONINE_PHOSPHATASE_ACTIVITY	GO_MAGNESIUM_DEPENDENT_PROTEIN_SERINE_THREONINE_PHOSPHATASE_ACTIVITY	17	-0.68902	-1.52319	0.0218487	0.146516	3570	tags=53%, list=19%, signal=43%	PPM1J/PPM1H/PDP1/TAB1/ILKAP/PPM1G/PPM1B/PPM1A/PPM1F
GO_AMINO_ACID_ACTIVATION	GO_AMINO_ACID_ACTIVATION	GO_AMINO_ACID_ACTIVATION	27	-0.687131	-1.68109	0.00322061	0.0810766	4465	tags=52%, list=23%, signal=40%	PPA2/GATB/HARS2/FARSB/TARS2/AASDH/AARS2/LARS2/YARS2/FARSA/EEF1E1/FARS2/AIMP2/MARS2
GO_RNA_METHYLATION	GO_RNA_METHYLATION	GO_RNA_METHYLATION	66	-0.686473	-1.93194	0.00149925	0.0810766	3167	tags=56%, list=16%, signal=47%	TRMT2B/TRMT10B/HSD17B10/ALKBH8/METTL6/TRMT2A/WDR4/NSUN5/RAMAC/TRMT6/TRMO/GTPBP3/VIRMA/CMTR2/THUMPD3/TRMT44/NSUN6/TFB2M/CMTR1/MRM1/TRDMT1/METTL3/RBM15B/EMG1/TRMT1L/METTL2A/TRMT61A/TRMT61B/FTSJ3/NSUN2/TRMT10C/MRM3/NOP2/METTL1/LCMT2/DIMT1/BCDIN3D
GO_SNRNA_3_END_PROCESSING	GO_SNRNA_3_END_PROCESSING	GO_SNRNA_3_END_PROCESSING	20	-0.685745	-1.55844	0.0116861	0.104495	1889	tags=45%, list=10%, signal=41%	EXOSC9/INTS12/INTS14/EXOSC3/USB1/TOE1/EXOSC4/INTS5/EXOSC2
GO_TRANSLATIONAL_TERMINATION	GO_TRANSLATIONAL_TERMINATION	GO_TRANSLATIONAL_TERMINATION	98	-0.685595	-2.0408	0.00141643	0.0810766	3945	tags=62%, list=21%, signal=50%	GFM2/MRPL2/MRPS25/MRPS21/MRPL43/MRPS18B/GSPT1/MRPL34/MRPS15/MRPS30/MRPL39/MRPL12/GLE1/APEH/MRPS36/MRPL50/MRPS22/MRPL4/MRPS12/PTCD3/MTRF1/MRPS9/MRPS18C/MRPL21/MRPL32/MRPS28/MRPL47/MRPL36/MRPL40/MRPL3/MRPL24/MRPS10/MRPL41/MRPL27/MRPL22/MRPS23/EIF5A2/JMJD4/MRPS14/MRPL15/AURKAIP1/MRPL1/MRPL52/MRPS18A/MRPL18/MRPL20/MRPS11/MRPL16/MRPS7/MRPS17/MRPL38/ERAL1/ETF1/MRPL58/ABCE1/MRPL35/MRPS26/OGFOD1/N6AMT1/M…
GO_ENDOCYTIC_PATCH	GO_ENDOCYTIC_PATCH	GO_ENDOCYTIC_PATCH	16	-0.685551	-1.49985	0.0302521	0.177009	764	tags=19%, list=4%, signal=18%	HIP1R/GMFB/TIGD5
GO_TERMINATION_OF_RNA_POLYMERASE_II_TRANSCRIPTION	GO_TERMINATION_OF_RNA_POLYMERASE_II_TRANSCRIPTION	GO_TERMINATION_OF_RNA_POLYMERASE_II_TRANSCRIPTION	32	-0.684456	-1.73716	0.00158983	0.0810766	3755	tags=62%, list=20%, signal=50%	NCBP1/MAZ/SNRPF/LSM10/SNRPG/MED18/PAPOLA/CPSF3/SSU72/NUDT21/SLBP/CSTF2T/SNRPB/CLP1/CSTF3/CSTF2/ZNF473/PCF11/TTF2/CPSF4
GO_PROTON_TRANSPORTING_ATP_SYNTHASE_COMPLEX	GO_PROTON_TRANSPORTING_ATP_SYNTHASE_COMPLEX	GO_PROTON_TRANSPORTING_ATP_SYNTHASE_COMPLEX	19	-0.68404	-1.54521	0.0165563	0.12786	3984	tags=63%, list=21%, signal=50%	ATP5F1B/ATP5F1D/ATP5PB/DMAC2L/ATP5ME/ATP5MC3/ATP5PF/ATP5MF/ATP5MC1/ATP5F1A/PPIF/ATP5PD
GO_TRNA_WOBBLE_BASE_MODIFICATION	GO_TRNA_WOBBLE_BASE_MODIFICATION	GO_TRNA_WOBBLE_BASE_MODIFICATION	22	-0.682637	-1.59435	0.00986842	0.0970595	3533	tags=55%, list=18%, signal=45%	ALKBH1/ELP5/ELP1/ELP2/ADAT2/ALKBH8/GTPBP3/KTI12/TRMU/CTU2/ELP3/ELP6
GO_MATURATION_OF_SSU_RRNA	GO_MATURATION_OF_SSU_RRNA	GO_MATURATION_OF_SSU_RRNA	45	-0.682213	-1.83625	0.0015456	0.0810766	3258	tags=64%, list=17%, signal=54%	DCAF13/SRFBP1/RPS16/NAT10/HELQ/TBL3/HEATR1/TSR2/WDR46/UTP23/ERCC2/PWP2/BTRC/TSR3/DHX37/UTP6/BMS1/MRPS11/UTP3/BYSL/NGDN/UTP4/KRI1/DDX52/NOL11/RRP36/RRS1/RIOK1/RCL1
GO_ORGANELLAR_RIBOSOME	GO_ORGANELLAR_RIBOSOME	GO_ORGANELLAR_RIBOSOME	81	-0.681484	-1.9912	0.00141643	0.0810766	3932	tags=58%, list=20%, signal=46%	MRPL2/MRPS21/MRPL43/MRPS18B/NSUN4/MRPL34/MRPS15/MRPS30/MRPL39/MRPL12/MRPS36/MRPL50/MRPS22/MRPL4/MRPS12/MPV17L2/MRPS9/MRPS18C/MRPL21/MRPL32/MRPS28/MRPL47/MRPL36/MRPL40/MRPL3/MRPL24/MRPS10/MRPL41/MRPL27/MRPL22/MRPS14/MRPL15/MRPL52/MALSU1/MRPS18A/MRPL18/MRPL20/MRPS11/MRPL16/MRPS7/MRPS17/MRPL38/MRPL58/MRPL35/MRPS26/MRPL46/MRPS31
GO_CYTOCHROME_COMPLEX_ASSEMBLY	GO_CYTOCHROME_COMPLEX_ASSEMBLY	GO_CYTOCHROME_COMPLEX_ASSEMBLY	28	-0.680339	-1.67744	0.00323625	0.0810766	784	tags=39%, list=4%, signal=38%	UQCR10/COA1/FASTKD3/TIMM21/LYRM7/COA5/COA3/UQCC1/HCCS/SCO1/SCO2
GO_MRNA_CIS_SPLICING_VIA_SPLICEOSOME	GO_MRNA_CIS_SPLICING_VIA_SPLICEOSOME	GO_MRNA_CIS_SPLICING_VIA_SPLICEOSOME	29	-0.679277	-1.68726	0.00161551	0.0810766	2996	tags=41%, list=16%, signal=35%	RBM4/SRSF10/DDX23/SNRPC/SRSF8/SRSF3/SRSF1/SRSF6/SRSF7/RBM4B/SRSF2/SRSF5
GO_NEGATIVE_REGULATION_OF_TELOMERE_MAINTENANCE_VIA_TELOMERE_LENGTHENING	GO_NEGATIVE_REGULATION_OF_TELOMERE_MAINTENANCE_VIA_TELOMERE_LENGTHENING	GO_NEGATIVE_REGULATION_OF_TELOMERE_MAINTENANCE_VIA_TELOMERE_LENGTHENING	21	-0.678689	-1.56172	0.0116086	0.1042	3765	tags=67%, list=20%, signal=54%	SRC/SLX4/DCP2/NAT10/PINX1/ACD/HNRNPA1/STN1/TERF2/XRN1/TERF1/HNRNPU/EXOSC10/CTC1
GO_ATP_SYNTHESIS_COUPLED_PROTON_TRANSPORT	GO_ATP_SYNTHESIS_COUPLED_PROTON_TRANSPORT	GO_ATP_SYNTHESIS_COUPLED_PROTON_TRANSPORT	22	-0.678104	-1.58376	0.0115132	0.103795	5205	tags=82%, list=27%, signal=60%	ATP5F1EP2/ATP5F1C/CYC1/COX5B/ATP5F1B/VPS9D1/ATP5F1D/ATP5PB/DMAC2L/ATP5ME/ATP5MC3/ATP5PF/ATP5MF/DNAJC30/ATP5MC1/ATP5F1A/STOML2/ATP5PD
GO_ESTABLISHMENT_OF_PROTEIN_LOCALIZATION_TO_MITOCHONDRIAL_MEMBRANE	GO_ESTABLISHMENT_OF_PROTEIN_LOCALIZATION_TO_MITOCHONDRIAL_MEMBRANE	GO_ESTABLISHMENT_OF_PROTEIN_LOCALIZATION_TO_MITOCHONDRIAL_MEMBRANE	16	-0.677014	-1.48117	0.0336134	0.184543	3053	tags=56%, list=16%, signal=47%	TOMM22/NDUFA13/OXA1L/HSP90AA1/PDCD5/MAIP1/HSPA4/TIMM10/TIMM22
GO_MITOCHONDRIAL_RNA_METABOLIC_PROCESS	GO_MITOCHONDRIAL_RNA_METABOLIC_PROCESS	GO_MITOCHONDRIAL_RNA_METABOLIC_PROCESS	40	-0.676201	-1.78703	0.00155521	0.0810766	3195	tags=65%, list=17%, signal=54%	CHCHD10/TARS2/MRPL12/TRMT10B/HSD17B10/PNPT1/FASTKD1/AARS2/TBRG4/FASTKD5/ELAC2/YARS2/MTERF3/SUPV3L1/TFB2M/SLIRP/CDK5RAP1/PDE12/TRNT1/TRMT61B/PRKAA1/GRSF1/TEFM/TRMT10C/TWNK/PUS1
GO_KINETOCHORE_ORGANIZATION	GO_KINETOCHORE_ORGANIZATION	GO_KINETOCHORE_ORGANIZATION	19	-0.676131	-1.52734	0.0182119	0.133315	3369	tags=53%, list=18%, signal=43%	CENPK/NUF2/CENPC/CENPF/CENPT/CENPX/RNF4/MIS12/CENPE/TRAPPC12
GO_REGULATION_OF_CELLULAR_AMINO_ACID_METABOLIC_PROCESS	GO_REGULATION_OF_CELLULAR_AMINO_ACID_METABOLIC_PROCESS	GO_REGULATION_OF_CELLULAR_AMINO_ACID_METABOLIC_PROCESS	60	-0.675827	-1.8774	0.00147059	0.0810766	3385	tags=55%, list=18%, signal=45%	PSMB7/PSMB10/NQO1/OAZ1/PSMB4/PSMD7/PSMC4/PSMB2/PSMA2/PARK7/PSMD9/PSMD1/PSMB3/PSMF1/PSMA4/PSMD4/COMT/PSMD12/PSMB5/PSMB1/PSME2/SIRT4/PSMA3/PSMB6/PSMB9/PSMC5/PSMD6/PSMC3/PSMC1/PSMC2/ODC1/PSMA5/PSME3
GO_MITOCHONDRIAL_TRANSLATIONAL_TERMINATION	GO_MITOCHONDRIAL_TRANSLATIONAL_TERMINATION	GO_MITOCHONDRIAL_TRANSLATIONAL_TERMINATION	84	-0.675785	-1.98111	0.00143472	0.0810766	3945	tags=62%, list=21%, signal=49%	GFM2/MRPL2/MRPS25/MRPS21/MRPL43/MRPS18B/MRPL34/MRPS15/MRPS30/MRPL39/MRPL12/MRPS36/MRPL50/MRPS22/MRPL4/MRPS12/PTCD3/MTRF1/MRPS9/MRPS18C/MRPL21/MRPL32/MRPS28/MRPL47/MRPL36/MRPL40/MRPL3/MRPL24/MRPS10/MRPL41/MRPL27/MRPL22/MRPS23/MRPS14/MRPL15/AURKAIP1/MRPL1/MRPL52/MRPS18A/MRPL18/MRPL20/MRPS11/MRPL16/MRPS7/MRPS17/MRPL38/ERAL1/MRPL58/MRPL35/MRPS26/MRPL46/MRPS31
GO_LIGASE_ACTIVITY_FORMING_CARBON_OXYGEN_BONDS	GO_LIGASE_ACTIVITY_FORMING_CARBON_OXYGEN_BONDS	GO_LIGASE_ACTIVITY_FORMING_CARBON_OXYGEN_BONDS	18	-0.67546	-1.51561	0.0246711	0.158244	4253	tags=50%, list=22%, signal=39%	HARS2/FARSB/TARS2/AARS2/LARS2/YARS2/FARSA/FARS2/MARS2
GO_BASE_CONVERSION_OR_SUBSTITUTION_EDITING	GO_BASE_CONVERSION_OR_SUBSTITUTION_EDITING	GO_BASE_CONVERSION_OR_SUBSTITUTION_EDITING	19	-0.674933	-1.52464	0.0182119	0.133315	3135	tags=37%, list=16%, signal=31%	ADAT2/ADAR/NUDT16/APOBEC3F/RBM47/APOBEC3H/METTL3
GO_RNA_5_END_PROCESSING	GO_RNA_5_END_PROCESSING	GO_RNA_5_END_PROCESSING	17	-0.672958	-1.48769	0.0285714	0.172137	2989	tags=59%, list=16%, signal=50%	POP7/HSD17B10/SSB/PNPT1/RPP25/RPP38/POP5/RPP40/POP1/TRMT10C
GO_SNRNA_PROCESSING	GO_SNRNA_PROCESSING	GO_SNRNA_PROCESSING	26	-0.670599	-1.638	0.00316957	0.0810766	3179	tags=50%, list=17%, signal=42%	INTS11/INTS10/EXOSC9/INTS12/INTS14/EXOSC3/USB1/INTS3/TOE1/EXOSC4/INTS9/INTS5/EXOSC2
GO_HISTONE_MRNA_METABOLIC_PROCESS	GO_HISTONE_MRNA_METABOLIC_PROCESS	GO_HISTONE_MRNA_METABOLIC_PROCESS	23	-0.670498	-1.58482	0.0131796	0.10947	3755	tags=65%, list=20%, signal=53%	NCBP1/SNRPF/LSM10/SNRPG/DCP2/SSB/CPSF3/SLBP/XRN1/SNRPB/LSM1/MTPAP/EXOSC10/ZNF473/EXOSC4
GO_MITOCHONDRIAL_TRANSLATION	GO_MITOCHONDRIAL_TRANSLATION	GO_MITOCHONDRIAL_TRANSLATION	128	-0.670151	-2.07332	0.00132802	0.0810766	2545	tags=57%, list=13%, signal=50%	GFM2/MRPL2/RCC1L/MRPS25/MRPS21/MRPL43/MRPS18B/NSUN4/TARS2/MRPL34/ALKBH1/MRPS15/MRPS30/MRPL39/MRPL12/MRPS36/MRPL50/AARS2/MRPS22/MRPL4/MRPS12/MPV17L2/PTCD3/MTRF1/C1QBP/MRPS9/MRPS18C/MRPL21/MRPL32/LARS2/MRPS28/YARS2/MTERF3/MRPL47/MRPL36/MRPL40/MRPL3/MRPL24/MRPS10/MRPL41/MRPL27/TRUB2/MRPL22/GFM1/MRPS23/MRPS14/RPUSD3/CDK5RAP1/MRPL15/AURKAIP1/MRPL1/MRPL52/MALSU1/MRPS18A/MRPL18/MRPL20/MRPS11/TSFM/MRPL16…
GO_PROTEASOME_ACCESSORY_COMPLEX	GO_PROTEASOME_ACCESSORY_COMPLEX	GO_PROTEASOME_ACCESSORY_COMPLEX	23	-0.668654	-1.58046	0.0131796	0.10947	3122	tags=65%, list=16%, signal=55%	ADRM1/PSMD14/PSMD7/PSMC4/PSMD9/PSMD1/PSMD4/PSMD12/PSME2/PSMC5/PSMD6/PSMC3/PSMC1/PSMC2/PSME3
GO_ENDORIBONUCLEASE_COMPLEX	GO_ENDORIBONUCLEASE_COMPLEX	GO_ENDORIBONUCLEASE_COMPLEX	26	-0.667286	-1.6299	0.00316957	0.0810766	3189	tags=58%, list=17%, signal=48%	DHX9/LAS1L/DROSHA/POP7/HSD17B10/TARBP2/RPP25/DICER1/CLP1/RPP38/POP5/RPP40/POP1/DGCR8/TRMT10C
GO_PROTON_TRANSPORTING_TWO_SECTOR_ATPASE_COMPLEX_PROTON_TRANSPORTING_DOMAIN	GO_PROTON_TRANSPORTING_TWO_SECTOR_ATPASE_COMPLEX_PROTON_TRANSPORTING_DOMAIN	GO_PROTON_TRANSPORTING_TWO_SECTOR_ATPASE_COMPLEX_PROTON_TRANSPORTING_DOMAIN	19	-0.667037	-1.5068	0.0264901	0.164604	4096	tags=63%, list=21%, signal=50%	ATP6V0A4/TCIRG1/ATP5PB/DMAC2L/ATP5ME/ATP5MC3/ATP5PF/ATP5MF/ATP5MC1/ATP6V0E2/ATP5PD/ATP6V0A2
GO_NCRNA_PROCESSING	GO_NCRNA_PROCESSING	GO_NCRNA_PROCESSING	336	-0.665964	-2.23529	0.00117371	0.0810766	3300	tags=54%, list=17%, signal=45%	KRR1/ELP5/DCAF13/SRFBP1/ELP1/INTS11/ELP2/TRMT2B/PES1/TSEN15/DUS4L/RPS16/LAS1L/ADAT2/PARN/NOL6/INTS10/DROSHA/WDR43/NAT10/TRMT10B/NOL9/ADAR/POP7/RBFA/HSD17B10/SSB/HELQ/WDR55/EXOSC9/MDN1/ALKBH8/METTL6/TBL3/HEATR1/TARBP2/RTCB/NOC4L/NUDT16/WDR12/TRUB1/DDX54/NOP10/WDR4/NSUN5/NPM3/AARS2/TRMT6/TRMO/ZBTB8OS/TSR2/WDR46/TYW1B/PA2G4/MPHOSPH6/TUT7/GTPBP3/ELAC2/INTS12/UTP11/THUMPD3/RRP9/UTP23/INTS14/ISG20L2/DD…
GO_CHAPERONE_MEDIATED_PROTEIN_COMPLEX_ASSEMBLY	GO_CHAPERONE_MEDIATED_PROTEIN_COMPLEX_ASSEMBLY	GO_CHAPERONE_MEDIATED_PROTEIN_COMPLEX_ASSEMBLY	17	-0.665686	-1.47161	0.0386555	0.199374	3166	tags=53%, list=16%, signal=44%	HDAC6/HSPD1/HSP90AA1/PFDN6/STUB1/CCT2/HSPA4/MKKS/BBS10
GO_RNA_MODIFICATION	GO_RNA_MODIFICATION	GO_RNA_MODIFICATION	141	-0.664804	-2.0718	0.00131926	0.0810766	3182	tags=52%, list=17%, signal=44%	ELP1/ELP2/TRMT2B/DUS4L/ADAT2/PARN/NAT10/TRMT10B/ADAR/HSD17B10/SSB/ALKBH8/METTL6/TRMT2A/NUDT16/TRUB1/NOP10/WDR4/NSUN5/AARS2/RAMAC/TRMT6/TRMO/GTPBP3/VIRMA/APOBEC3F/CMTR2/THUMPD3/TRMT44/KTI12/RPUSD1/NSUN6/TFB2M/TRMU/CMTR1/RBM47/TRUB2/CTU2/APOBEC3H/ELP3/TSR3/RPUSD3/PUS7/CDK5RAP1/MRM1/TRDMT1/MTFMT/DUS3L/METTL3/RBM15B/EMG1/SEPHS2/GAR1/TRMT1L/METTL2A/TRMT61A/TRMT61B/FTSJ3/OSGEPL1/DKC1/ELP6/ANKRD16/NSUN2…
GO_ENDONUCLEASE_COMPLEX	GO_ENDONUCLEASE_COMPLEX	GO_ENDONUCLEASE_COMPLEX	32	-0.66419	-1.68572	0.00317965	0.0810766	3415	tags=59%, list=18%, signal=49%	SLX4/MUS81/DHX9/LAS1L/DROSHA/POP7/HSD17B10/TARBP2/RAD51C/RPP25/EME1/DICER1/CLP1/RPP38/POP5/RPP40/POP1/DGCR8/TRMT10C
GO_MATURATION_OF_LSU_RRNA	GO_MATURATION_OF_LSU_RRNA	GO_MATURATION_OF_LSU_RRNA	20	-0.664039	-1.50911	0.0217028	0.146516	3164	tags=55%, list=16%, signal=46%	PES1/LAS1L/NOL9/WDR12/SNU13/MRPL1/RPL7L1/DDX18/GTPBP4/FTSJ3/ZNHIT6
GO_INO80_TYPE_COMPLEX	GO_INO80_TYPE_COMPLEX	GO_INO80_TYPE_COMPLEX	25	-0.663928	-1.61047	0.00470958	0.0828798	3196	tags=48%, list=17%, signal=40%	ING3/TRRAP/INO80C/NFRKB/ACTL6A/DMAP1/ACTR5/UCHL5/MCRS1/EP400/RUVBL1/INO80
GO_RIBOSOME_BIOGENESIS	GO_RIBOSOME_BIOGENESIS	GO_RIBOSOME_BIOGENESIS	266	-0.661468	-2.20182	0.0011919	0.0810766	3218	tags=53%, list=17%, signal=45%	DDX3X/SRFBP1/PES1/RPS16/LAS1L/NOL6/DROSHA/WDR43/NAT10/NMD3/NOL9/POP7/RBFA/HEATR3/HELQ/WDR55/EXOSC9/MDN1/TBL3/ZNF593/HEATR1/TSC1/NOC4L/NUDT16/WDR12/RPS27L/DDX54/NOP10/NSUN5/NPM3/TSR2/WDR46/EIF6/MPV17L2/PA2G4/MPHOSPH6/XPO1/C1QBP/ZNF658/CUL4A/MTERF3/UTP11/MRPL36/RRP9/UTP23/ISG20L2/DDX51/ERCC2/RPL26L1/PWP2/DHX30/DDX21/EXOSC3/RPL6/RPUSD1/TFB2M/MRPL22/RPP25/BTRC/WDR75/RPF1/MRTO4/TSR3/UTP14C/DHX37/UTP6/…
GO_MITOCHONDRIAL_GENE_EXPRESSION	GO_MITOCHONDRIAL_GENE_EXPRESSION	GO_MITOCHONDRIAL_GENE_EXPRESSION	152	-0.660834	-2.07863	0.00130378	0.0810766	3945	tags=58%, list=21%, signal=46%	GFM2/MRPL2/RCC1L/MRPS25/MRPS21/MRPL43/MRPS18B/CHCHD10/NSUN4/TARS2/MRPL34/ALKBH1/MRPS15/MRPS30/MRPL39/MRPL12/TRMT10B/HSD17B10/PNPT1/MRPS36/MRPL50/AARS2/MRPS22/MRPL4/MRPS12/MPV17L2/PTCD3/MTRF1/C1QBP/MRPS9/MRPS18C/MRPL21/MRPL32/LARS2/TBRG4/MRPS28/FASTKD5/ELAC2/YARS2/MTERF3/SUPV3L1/MRPL47/MRPL36/MRPL40/MRPL3/MRPL24/MRPS10/TFB2M/MRPL41/MRPL27/TRUB2/MRPL22/GFM1/MRPS23/MRPS14/RPUSD3/CDK5RAP1/MRPL15/AURK…
GO_DNA_STRAND_ELONGATION	GO_DNA_STRAND_ELONGATION	GO_DNA_STRAND_ELONGATION	22	-0.658436	-1.53782	0.0213816	0.145762	2662	tags=45%, list=14%, signal=39%	POLD2/MCM4/LIG3/RFC4/GINS4/MCM7/GINS2/MCM3/PCNA/GINS3
GO_NCRNA_3_END_PROCESSING	GO_NCRNA_3_END_PROCESSING	GO_NCRNA_3_END_PROCESSING	36	-0.657982	-1.70354	0.00315457	0.0810766	3339	tags=53%, list=17%, signal=44%	ERI3/PARN/HSD17B10/SSB/EXOSC9/ELAC2/INTS12/INTS14/EXOSC3/USB1/POLR3K/TRNT1/EXOSC10/TOE1/DKC1/EXOSC4/INTS5/TRMT10C/EXOSC2
GO_MITOCHONDRIAL_LARGE_RIBOSOMAL_SUBUNIT	GO_MITOCHONDRIAL_LARGE_RIBOSOMAL_SUBUNIT	GO_MITOCHONDRIAL_LARGE_RIBOSOMAL_SUBUNIT	53	-0.656603	-1.80645	0.0015015	0.0810766	3932	tags=58%, list=20%, signal=47%	MRPL2/MRPL43/NSUN4/MRPL34/MRPS30/MRPL39/MRPL12/MRPL50/MRPL4/MPV17L2/MRPL21/MRPL32/MRPL47/MRPL36/MRPL40/MRPL3/MRPL24/MRPL41/MRPL27/MRPL22/MRPL15/MRPL52/MALSU1/MRPS18A/MRPL18/MRPL20/MRPL16/MRPL38/MRPL58/MRPL35/MRPL46
GO_U2_SNRNP	GO_U2_SNRNP	GO_U2_SNRNP	18	-0.65589	-1.4717	0.0328947	0.182365	3368	tags=44%, list=18%, signal=37%	SNRPG/SNRPD1/SNRPB2/PHF5A/SF3A3/SNRPA1/SF3B5/SNRPB
GO_N_TERMINAL_PROTEIN_AMINO_ACID_MODIFICATION	GO_N_TERMINAL_PROTEIN_AMINO_ACID_MODIFICATION	GO_N_TERMINAL_PROTEIN_AMINO_ACID_MODIFICATION	29	-0.655395	-1.62794	0.00807754	0.0908706	3672	tags=52%, list=19%, signal=42%	NAA40/NAA30/SOX4/NAA16/NTMT1/NMT2/NMT1/NAA15/NAA25/NAA35/PDF/NAA20/PPM1B/PPM1A/MAP6D1
GO_TRANSCRIPTION_PREINITIATION_COMPLEX_ASSEMBLY	GO_TRANSCRIPTION_PREINITIATION_COMPLEX_ASSEMBLY	GO_TRANSCRIPTION_PREINITIATION_COMPLEX_ASSEMBLY	40	-0.653709	-1.72759	0.00155521	0.0810766	3982	tags=45%, list=21%, signal=36%	TAF1/GTF3C3/THRA/GTF3C5/PSMC4/SGF29/HMGB1/UBTF/GTF2A2/RRN3/PSMC5/BRF1/PSMC3/PSMC2/TAF6L/TAF1C/TBP/MED6
GO_BASE_EXCISION_REPAIR	GO_BASE_EXCISION_REPAIR	GO_BASE_EXCISION_REPAIR	39	-0.652988	-1.71214	0.00311526	0.0810766	3263	tags=46%, list=17%, signal=38%	POLQ/DNA2/POLM/RPA1/OGG1/RPA3/NEIL2/USP47/LIG3/NEIL3/WRN/RPA2/PCNA/UNG/FEN1/NTHL1/PRMT6/TDG
GO_DNA_POLYMERASE_ACTIVITY	GO_DNA_POLYMERASE_ACTIVITY	GO_DNA_POLYMERASE_ACTIVITY	30	-0.651907	-1.62863	0.008	0.0906092	3906	tags=43%, list=20%, signal=35%	POLQ/REV1/TEP1/POLM/POLD2/PRIMPOL/TERF2/REV3L/TERF1/POLA2/DKC1/POLE3/POLE2
GO_MITOTIC_METAPHASE_PLATE_CONGRESSION	GO_MITOTIC_METAPHASE_PLATE_CONGRESSION	GO_MITOTIC_METAPHASE_PLATE_CONGRESSION	43	-0.651442	-1.73288	0.00310559	0.0810766	3724	tags=60%, list=19%, signal=49%	MAD1L1/CUL3/CDC23/KIF14/NUF2/CENPC/PINX1/VPS4B/PSRC1/CHMP4A/CHMP1A/KIFC1/CDCA8/PIBF1/RAB11A/MIS12/NUP62/CENPE/KIF18A/HNRNPU/SPDL1/SEH1L/CHMP6/CHAMP1/CCNB1/RRS1
GO_ENDONUCLEASE_ACTIVITY_ACTIVE_WITH_EITHER_RIBO_OR_DEOXYRIBONUCLEIC_ACIDS_AND_PRODUCING_5_PHOSPHOMONOESTERS	GO_ENDONUCLEASE_ACTIVITY_ACTIVE_WITH_EITHER_RIBO_OR_DEOXYRIBONUCLEIC_ACIDS_AND_PRODUCING_5_PHOSPHOMONOESTERS	GO_ENDONUCLEASE_ACTIVITY_ACTIVE_WITH_EITHER_RIBO_OR_DEOXYRIBONUCLEIC_ACIDS_AND_PRODUCING_5_PHOSPHOMONOESTERS	33	-0.650595	-1.66096	0.00316456	0.0810766	3415	tags=48%, list=18%, signal=40%	DNA2/SLX4/DROSHA/POP7/NUDT16/RNASEH1/DBR1/FAN1/RPP25/DICER1/RPP38/POP5/RPP40/POP1/FEN1/DGCR8
GO_DNA_POLYMERASE_COMPLEX	GO_DNA_POLYMERASE_COMPLEX	GO_DNA_POLYMERASE_COMPLEX	21	-0.64864	-1.49258	0.0248756	0.158622	1318	tags=29%, list=7%, signal=27%	POLD2/REV3L/MCM3/POLA2/POLE3/POLE2
GO_ESTABLISHMENT_OF_PROTEIN_LOCALIZATION_TO_CHROMOSOME	GO_ESTABLISHMENT_OF_PROTEIN_LOCALIZATION_TO_CHROMOSOME	GO_ESTABLISHMENT_OF_PROTEIN_LOCALIZATION_TO_CHROMOSOME	23	-0.648168	-1.53204	0.0230643	0.15201	5253	tags=65%, list=27%, signal=47%	CCT8/RUVBL2/CCT3/ATR/BRCA2/WRAP53/SPIDR/TCP1/SGF29/ACD/CCT7/CCT2/TERF1/LRWD1/DKC1
GO_POSITIVE_REGULATION_OF_CILIUM_ASSEMBLY	GO_POSITIVE_REGULATION_OF_CILIUM_ASSEMBLY	GO_POSITIVE_REGULATION_OF_CILIUM_ASSEMBLY	22	-0.647691	-1.51273	0.0263158	0.1644	3686	tags=41%, list=19%, signal=33%	CROCC/CEP135/HTT/CCDC88A/BBS4/TAPT1/ATMIN/ENTR1/WRAP73
GO_CENTROMERE_COMPLEX_ASSEMBLY	GO_CENTROMERE_COMPLEX_ASSEMBLY	GO_CENTROMERE_COMPLEX_ASSEMBLY	37	-0.647523	-1.68435	0.00156986	0.0810766	3565	tags=54%, list=19%, signal=44%	CENPV/CENPP/CENPC/CENPO/CENPM/CENPQ/CENPF/CENPT/CENPX/RNF4/CENPI/HELLS/OIP5/MIS12/CENPE/MIS18BP1/RUVBL1/POLE3/TRAPPC12/NASP
GO_2_IRON_2_SULFUR_CLUSTER_BINDING	GO_2_IRON_2_SULFUR_CLUSTER_BINDING	GO_2_IRON_2_SULFUR_CLUSTER_BINDING	18	-0.647498	-1.45287	0.0460526	0.221179	3790	tags=56%, list=20%, signal=45%	FECH/SDHB/CISD1/UQCRFS1/ISCU/GLRX2/FDX2/CIAPIN1/ISCA2/GLRX5
GO_RIBOSOMAL_SMALL_SUBUNIT_BIOGENESIS	GO_RIBOSOMAL_SMALL_SUBUNIT_BIOGENESIS	GO_RIBOSOMAL_SMALL_SUBUNIT_BIOGENESIS	64	-0.645874	-1.81627	0.00147929	0.0810766	3258	tags=56%, list=17%, signal=47%	DCAF13/SRFBP1/RPS16/NAT10/HELQ/TBL3/HEATR1/RPS27L/TSR2/WDR46/UTP23/ERCC2/PWP2/BTRC/TSR3/DHX37/UTP6/BMS1/MRPS11/UTP3/MRPS7/EMG1/ERAL1/BYSL/NGDN/UTP4/KRI1/DDX52/RRP7A/NOL11/SURF6/RRP36/RRS1/RIOK1/RCL1/LTV1
GO_DNA_SECONDARY_STRUCTURE_BINDING	GO_DNA_SECONDARY_STRUCTURE_BINDING	GO_DNA_SECONDARY_STRUCTURE_BINDING	22	-0.645774	-1.50825	0.0279605	0.169833	3152	tags=41%, list=16%, signal=34%	HMGB3/MSH6/HMGB1/RAD51C/NEIL3/WRN/MEN1/XPC/BLM
GO_DNA_TEMPLATED_TRANSCRIPTION_TERMINATION	GO_DNA_TEMPLATED_TRANSCRIPTION_TERMINATION	GO_DNA_TEMPLATED_TRANSCRIPTION_TERMINATION	65	-0.644773	-1.80696	0.00151286	0.0810766	3874	tags=62%, list=20%, signal=49%	POLR2F/GTF2H5/NCBP1/MAZ/TTF1/SNRPF/LSM10/CCNH/TAF1A/SNRPG/PRMT5/MED18/DHX9/PAPOLA/CPSF3/GTF2H4/POLR2A/UBTF/SSU72/GTF2H1/ERCC2/NUDT21/SLBP/CSTF2T/POLR3K/SNRPB/GTF2H2/ZMPSTE24/CLP1/CSTF3/POLR2L/CSTF2/ZNF473/ERCC3/PCF11/TAF1C/TBP/POLR1C/TTF2/CPSF4
GO_DNA_HELICASE_ACTIVITY	GO_DNA_HELICASE_ACTIVITY	GO_DNA_HELICASE_ACTIVITY	69	-0.644413	-1.82624	0.00148588	0.0810766	4283	tags=64%, list=22%, signal=50%	MCM9/XRCC5/DDX11/RFC3/POLQ/DNA2/CHD7/MCM8/CDC45/HELB/CHD6/DDX3X/CHTF18/DHX9/IGHMBP2/HELQ/CHTF8/FBH1/MCM5/RFC5/GTF2F2/G3BP1/MCM4/SUPV3L1/XRCC6/CHD8/CHD1/RFC4/WRN/ERCC2/DHX36/RECQL5/GINS4/RFC2/MCM7/ERCC6L/GINS2/MCM3/RUVBL1/MCM6/ERCC3/BLM/SMARCAD1/TWNK
GO_RRNA_METABOLIC_PROCESS	GO_RRNA_METABOLIC_PROCESS	GO_RRNA_METABOLIC_PROCESS	202	-0.644112	-2.08822	0.00127551	0.0810766	3339	tags=53%, list=17%, signal=45%	ERI3/KRR1/DCAF13/SRFBP1/PES1/RPS16/LAS1L/NOL6/DROSHA/WDR43/NAT10/NOL9/POP7/RBFA/HELQ/WDR55/EXOSC9/MDN1/TBL3/HEATR1/NOC4L/NUDT16/WDR12/DDX54/NOP10/NSUN5/NPM3/NIFK/TSR2/WDR46/PA2G4/MPHOSPH6/UTP11/RRP9/UTP23/ISG20L2/DDX51/ERCC2/PWP2/DDX21/EXOSC3/RPUSD1/TFB2M/RPP25/XRN1/BTRC/WDR75/RPF1/MRTO4/TSR3/UTP14C/DHX37/UTP6/RRP1/SNU13/MRPL1/RPL7L1/MRM1/DDX18/BMS1/MRPS11/UTP3/WDR18/RRP1B/NOP58/EMG1/UTP14A/IMP4/…
GO_RIBOSOMAL_LARGE_SUBUNIT_ASSEMBLY	GO_RIBOSOMAL_LARGE_SUBUNIT_ASSEMBLY	GO_RIBOSOMAL_LARGE_SUBUNIT_ASSEMBLY	27	-0.643989	-1.57554	0.00966184	0.0970595	1554	tags=33%, list=8%, signal=31%	DHX30/RPL6/MRTO4/MRPL20/FASTKD2/BRIX1/DDX28/RRS1/NOP2
GO_SNRNA_METABOLIC_PROCESS	GO_SNRNA_METABOLIC_PROCESS	GO_SNRNA_METABOLIC_PROCESS	35	-0.643759	-1.65583	0.00475436	0.0828798	3472	tags=49%, list=18%, signal=40%	ZCCHC8/INTS11/INTS10/EXOSC9/NOP10/INTS12/INTS14/EXOSC3/USB1/INTS3/EXOSC10/TOE1/DKC1/EXOSC4/INTS9/INTS5/EXOSC2
GO_HEMATOPOIETIC_STEM_CELL_DIFFERENTIATION	GO_HEMATOPOIETIC_STEM_CELL_DIFFERENTIATION	GO_HEMATOPOIETIC_STEM_CELL_DIFFERENTIATION	78	-0.641259	-1.85095	0.00144092	0.0810766	3398	tags=49%, list=18%, signal=40%	PSMD14/LMO1/EIF2AK2/PSMB7/PSMB10/PSMB4/PSMD7/PSMC4/PSMB2/PSMA2/PSMD9/PSMD1/PSMB3/PSMF1/PSMA4/GATA2/PSMD4/PSMD12/PSMB5/HSPA9/ERCC2/YTHDF2/ITCH/PSMB1/PSME2/PSMA3/PUS7/PSMB6/PSMB9/METTL3/PSMC5/PSMD6/PSMC3/PSMC1/PSMC2/PSMA5/PSME3/N4BP2L2
GO_RIBONUCLEOPROTEIN_COMPLEX_BIOGENESIS	GO_RIBONUCLEOPROTEIN_COMPLEX_BIOGENESIS	GO_RIBONUCLEOPROTEIN_COMPLEX_BIOGENESIS	383	-0.641059	-2.16309	0.0011655	0.0810766	3304	tags=51%, list=17%, signal=43%	CHD7/NUP88/DDX27/GEMIN2/COIL/SNRPG/ERI3/SCAF11/KRR1/PRMT5/DCAF13/DDX3X/SRFBP1/DHX9/PES1/RPS16/LAS1L/NOL6/DROSHA/WDR43/NAT10/HSP90AA1/NMD3/NOL9/ADAR/POP7/RBFA/DDX20/HEATR3/SNRPD1/SRSF10/HELQ/WDR55/EXOSC9/MDN1/TBL3/ZNF593/DDX23/HEATR1/TSC1/TARBP2/NOC4L/NUDT16/WDR12/RPS27L/EIF2S2/DDX54/NOP10/NSUN5/NPM3/RAMAC/DENR/SNRPC/LUC7L3/TSR2/WDR46/EIF6/MPV17L2/PA2G4/MPHOSPH6/XPO1/PTBP2/C1QBP/ZNF658/CUL4A/MTERF…
GO_REPLISOME	GO_REPLISOME	GO_REPLISOME	26	-0.638043	-1.55848	0.0158479	0.123891	3311	tags=50%, list=17%, signal=41%	HELB/RPA1/BCAS2/POLD2/RPA3/STN1/PRPF19/RPA2/MCM3/POLA2/PCNA/PLRG1/PURB
GO_NUCLEAR_REPLICATION_FORK	GO_NUCLEAR_REPLICATION_FORK	GO_NUCLEAR_REPLICATION_FORK	41	-0.63672	-1.68449	0.00311526	0.0810766	3352	tags=49%, list=17%, signal=40%	CDC45/HELB/RPA1/BCAS2/POLD2/RPA3/TIMELESS/STN1/MCM10/PRPF19/GINS4/RPA2/GINS2/MCM3/POLA2/PCNA/PLRG1/TIPIN/PURB/SMARCAD1
GO_NCRNA_METABOLIC_PROCESS	GO_NCRNA_METABOLIC_PROCESS	GO_NCRNA_METABOLIC_PROCESS	405	-0.636709	-2.15749	0.00115207	0.0810766	3182	tags=47%, list=17%, signal=40%	ELP1/INTS11/ELP2/TRMT2B/PES1/TSEN15/DUS4L/RPS16/LAS1L/ADAT2/PARN/NOL6/INTS10/DROSHA/WDR43/NAT10/TRMT10B/NOL9/ADAR/POP7/RBFA/HSD17B10/SSB/PNPT1/SEPSECS/HELQ/WDR55/EXOSC9/MDN1/ALKBH8/METTL6/TBL3/HEATR1/TARBP2/RTCB/NOC4L/NUDT16/WDR12/TRUB1/DDX54/NOP10/WDR4/NSUN5/NPM3/AARS2/TRMT6/NIFK/TRMO/ZBTB8OS/TSR2/WDR46/TYW1B/PA2G4/MPHOSPH6/TUT7/GTPBP3/LARS2/TDRKH/XPO5/ELAC2/YARS2/INTS12/UTP11/FARSA/THUMPD3/RRP9…
GO_RNA_POLYMERASE_II_PREINITIATION_COMPLEX_ASSEMBLY	GO_RNA_POLYMERASE_II_PREINITIATION_COMPLEX_ASSEMBLY	GO_RNA_POLYMERASE_II_PREINITIATION_COMPLEX_ASSEMBLY	25	-0.636647	-1.54429	0.021978	0.14704	3099	tags=48%, list=16%, signal=40%	TAF1/THRA/PSMC4/SGF29/HMGB1/GTF2A2/PSMC5/PSMC3/PSMC2/TAF6L/TBP/MED6
GO_METAL_CLUSTER_BINDING	GO_METAL_CLUSTER_BINDING	GO_METAL_CLUSTER_BINDING	57	-0.635264	-1.75776	0.00297619	0.0810766	2319	tags=42%, list=12%, signal=37%	FECH/DNA2/SDHB/ABAT/CISD1/UQCRFS1/TYW1B/CIAO3/ISCU/NDUFS8/NFS1/ERCC2/GLRX2/FDX2/REV3L/ELP3/CDK5RAP1/RSAD1/NDUFS2/CIAPIN1/ISCA2/GLRX5/NTHL1/MOCS1
GO_POSITIVE_REGULATION_OF_CHROMOSOME_SEGREGATION	GO_POSITIVE_REGULATION_OF_CHROMOSOME_SEGREGATION	GO_POSITIVE_REGULATION_OF_CHROMOSOME_SEGREGATION	26	-0.631097	-1.54151	0.0158479	0.123891	2289	tags=54%, list=12%, signal=48%	RAD18/DDX11/ANAPC5/CUL3/ESPL1/SFPQ/SLF1/ANAPC4/SMC6/HNRNPU/FEN1/SLF2/RCC2/CCNB1
GO_SM_LIKE_PROTEIN_FAMILY_COMPLEX	GO_SM_LIKE_PROTEIN_FAMILY_COMPLEX	GO_SM_LIKE_PROTEIN_FAMILY_COMPLEX	68	-0.630834	-1.78806	0.0014771	0.0810766	3580	tags=40%, list=19%, signal=32%	SNRPF/LSM10/GEMIN2/SNRPG/DDX20/SNRPD1/LSM8/DDX23/ARFGEF1/SNRPB2/SNRPC/LUC7L3/PHF5A/SF3A3/SNRPA1/SF3B5/SNRPB/LSM1/SNU13/PRPF31/GEMIN5/SNRNP40/EFTUD2/GEMIN6/CD2BP2/PRPF4/GEMIN4
GO_SPLICEOSOMAL_TRI_SNRNP_COMPLEX	GO_SPLICEOSOMAL_TRI_SNRNP_COMPLEX	GO_SPLICEOSOMAL_TRI_SNRNP_COMPLEX	29	-0.629798	-1.56436	0.00969305	0.0970595	3580	tags=31%, list=19%, signal=25%	SNRPF/SNRPG/SNRPD1/LSM8/SNRPB/SNU13/PRPF31/EFTUD2/PRPF4
GO_DNA_DEPENDENT_DNA_REPLICATION	GO_DNA_DEPENDENT_DNA_REPLICATION	GO_DNA_DEPENDENT_DNA_REPLICATION	140	-0.629311	-1.95898	0.0013245	0.0810766	2662	tags=44%, list=14%, signal=38%	POLD2/CHEK2/PRIMPOL/THOC1/E2F8/RPA3/CHTF8/RFWD3/SSBP1/FBH1/ORC4/MCM5/TICRR/RFC5/CDK9/CENPX/MCM4/BAZ1A/TIMELESS/LIG3/RFC4/WRN/MCMBP/MCM10/TERF2/STOML2/RECQL5/ZNF830/GINS4/DNAJA3/CCNE1/RFC2/REV3L/EME1/MCM7/ZMPSTE24/RPA2/GINS2/TERF1/GMNN/MCM3/WDR18/CCNE2/ORC2/INO80/ORC6/POLA2/PCNA/ZNF365/MCM6/LRWD1/FEN1/ORC5/GINS3/MGME1/POLE3/CDC7/BLM/TIPIN/POLE2/TWNK
GO_RNA_CAPPING	GO_RNA_CAPPING	GO_RNA_CAPPING	29	-0.62914	-1.56272	0.00969305	0.0970595	4094	tags=66%, list=21%, signal=52%	GTF2H3/POLR2F/GTF2H5/NCBP1/CCNH/NCBP3/RAMAC/GTF2H4/GTF2F2/POLR2A/POLR2G/GTF2H1/CMTR2/ERCC2/CMTR1/GTF2H2/POLR2D/POLR2L/ERCC3
GO_CATALYTIC_ACTIVITY_ACTING_ON_DNA	GO_CATALYTIC_ACTIVITY_ACTING_ON_DNA	GO_CATALYTIC_ACTIVITY_ACTING_ON_DNA	185	-0.629069	-2.02006	0.00129702	0.0810766	3533	tags=45%, list=18%, signal=37%	ALKBH1/REV1/DNMT1/DNMT3A/CHD7/TEP1/MCM8/SLX4/CDC45/HELB/MUS81/POLM/CHD6/DDX3X/CHTF18/DHX9/IGHMBP2/HELQ/OGG1/POLD2/PRIMPOL/NEIL2/CHTF8/FBH1/MCM5/RFC5/GTF2F2/G3BP1/MCM4/TDP2/ERI2/SUPV3L1/XRCC6/CHD8/ALKBH2/CHD1/RAD51C/LIG3/NEIL3/RFC4/WRN/ERCC2/DHX36/TDP1/TOP3B/FAN1/TERF2/RECQL5/GINS4/RFC2/REV3L/EME1/MCM7/DICER1/ERCC6L/GINS2/TERF1/MCM3/NME1/DDX1/RUVBL1/POLA2/PCNA/DCLRE1A/BIVM/UNG/MCM6/ERCC3/DKC1/FEN1…
GO_POSITIVE_REGULATION_OF_ALCOHOL_BIOSYNTHETIC_PROCESS	GO_POSITIVE_REGULATION_OF_ALCOHOL_BIOSYNTHETIC_PROCESS	GO_POSITIVE_REGULATION_OF_ALCOHOL_BIOSYNTHETIC_PROCESS	27	-0.628505	-1.53766	0.0144928	0.116625	3247	tags=41%, list=17%, signal=34%	P2RY1/MIR182/P2RY6/WNT4/FGF1/SNCA/BMP6/SREBF1/GPER1/PRKAA1/NTSR1
GO_CELL_CYCLE_DNA_REPLICATION	GO_CELL_CYCLE_DNA_REPLICATION	GO_CELL_CYCLE_DNA_REPLICATION	63	-0.627162	-1.76775	0.00145773	0.0810766	2662	tags=41%, list=14%, signal=36%	POLD2/CHEK2/E2F8/RPA3/MCM5/RFC5/MCM4/RFC4/TERF2/ZNF830/RFC2/MCM7/ZMPSTE24/RPA2/TERF1/GMNN/MCM3/INO80/POLA2/PCNA/MCM6/FEN1/POLE3/CDC7/TIPIN/POLE2
GO_TRANSCRIPTION_BY_RNA_POLYMERASE_III	GO_TRANSCRIPTION_BY_RNA_POLYMERASE_III	GO_TRANSCRIPTION_BY_RNA_POLYMERASE_III	47	-0.627132	-1.69875	0.00308642	0.0810766	2682	tags=51%, list=14%, signal=44%	GTF3C1/POLR3G/POLR3E/IVNS1ABP/CHD8/ZNF76/SNAPC5/DHX36/MTOR/POLR3C/POLR3K/POLR3GL/ICE2/GTF3C6/BRF1/GTF3C2/POLR2L/BRCA1/SNAPC4/CEBPA/POLR3H/TBP/POLR1C/POLR3B
GO_REGULATION_OF_DNA_DEPENDENT_DNA_REPLICATION	GO_REGULATION_OF_DNA_DEPENDENT_DNA_REPLICATION	GO_REGULATION_OF_DNA_DEPENDENT_DNA_REPLICATION	46	-0.626972	-1.69241	0.00310559	0.0810766	2629	tags=48%, list=14%, signal=41%	CHEK2/E2F8/CHTF8/FBH1/TICRR/RFC5/TIMELESS/LIG3/RFC4/TERF2/STOML2/ZNF830/RFC2/ZMPSTE24/TERF1/GMNN/WDR18/INO80/ZNF365/CDC7/BLM/TIPIN
GO_POSITIVE_REGULATION_OF_DNA_TEMPLATED_TRANSCRIPTION_ELONGATION	GO_POSITIVE_REGULATION_OF_DNA_TEMPLATED_TRANSCRIPTION_ELONGATION	GO_POSITIVE_REGULATION_OF_DNA_TEMPLATED_TRANSCRIPTION_ELONGATION	28	-0.625771	-1.5429	0.0113269	0.10231	2583	tags=57%, list=13%, signal=50%	CDC73/ERCC6/EAPP/SUPT4H1/CDK12/THOC1/LEO1/THOC5/CDK9/GTF2F2/CDK13/SUPT16H/ELL3/WDR61/CCNT2/CTR9
GO_PEPTIDYL_ARGININE_MODIFICATION	GO_PEPTIDYL_ARGININE_MODIFICATION	GO_PEPTIDYL_ARGININE_MODIFICATION	27	-0.625385	-1.53003	0.0193237	0.138804	5300	tags=59%, list=28%, signal=43%	KRTCAP2/CARM1/PADI4/PRMT2/NDUFAF7/PRMT1/PRMT9/ART5/PRMT5/NDUFAF5/PARK7/COPRS/PRMT7/PRMT3/PRDM4/PRMT6
GO_TELOMERIC_DNA_BINDING	GO_TELOMERIC_DNA_BINDING	GO_TELOMERIC_DNA_BINDING	36	-0.625095	-1.6184	0.00788644	0.0904963	3260	tags=47%, list=17%, signal=39%	UPF3A/RPA1/ZBTB48/ACD/HNRNPA1/XRCC6/NCL/WRN/STN1/KDM1A/TERF2/TP53BP1/RPA2/TERF1/HNRNPD/BLM/CTC1
GO_NADH_DEHYDROGENASE_COMPLEX_ASSEMBLY	GO_NADH_DEHYDROGENASE_COMPLEX_ASSEMBLY	GO_NADH_DEHYDROGENASE_COMPLEX_ASSEMBLY	52	-0.623318	-1.71442	0.00301659	0.0810766	4826	tags=60%, list=25%, signal=45%	NDUFA13/NDUFB8/NDUFS7/OXA1L/NDUFAF7/NDUFA3/NDUFB7/NDUFAF8/NDUFB5/NDUFA2/BCS1L/NDUFAF3/NDUFB3/NDUFAF5/NDUFB9/NDUFS3/NDUFS5/TIMMDC1/NDUFS8/COA1/NDUFAF1/NDUFV3/ACAD9/NDUFB6/FOXRED1/NDUFS2/TMEM126B/NDUFAF4/TIMM21/NDUFA6/NDUFA8
GO_GLUCOSAMINE_CONTAINING_COMPOUND_METABOLIC_PROCESS	GO_GLUCOSAMINE_CONTAINING_COMPOUND_METABOLIC_PROCESS	GO_GLUCOSAMINE_CONTAINING_COMPOUND_METABOLIC_PROCESS	21	-0.62249	-1.4324	0.0431177	0.212221	4682	tags=43%, list=24%, signal=32%	GNPDA2/NANP/CHST3/GNE/PGM3/EXTL2/OGA/GNPDA1/NAGK
GO_POSITIVE_REGULATION_OF_PEPTIDYL_LYSINE_ACETYLATION	GO_POSITIVE_REGULATION_OF_PEPTIDYL_LYSINE_ACETYLATION	GO_POSITIVE_REGULATION_OF_PEPTIDYL_LYSINE_ACETYLATION	33	-0.622157	-1.58836	0.00791139	0.0904963	3324	tags=39%, list=17%, signal=33%	SOX4/RPS6KA4/PAXIP1/RPS6KA5/BRD7/KAT2A/TADA2B/TADA2A/GLYR1/BRCA1/ARRB1/PRKAA1/SPHK2
GO_MIRNA_BINDING	GO_MIRNA_BINDING	GO_MIRNA_BINDING	26	-0.621365	-1.51774	0.0253566	0.160044	4084	tags=50%, list=21%, signal=39%	ZC3H7A/HNRNPA2B1/PUM2/RBM4/PNPT1/TARBP2/TUT7/PUM1/HNRNPA1/RBM10/DDX21/TUT4/ZC3H10
GO_DNA_DIRECTED_DNA_POLYMERASE_ACTIVITY	GO_DNA_DIRECTED_DNA_POLYMERASE_ACTIVITY	GO_DNA_DIRECTED_DNA_POLYMERASE_ACTIVITY	23	-0.620956	-1.46772	0.0362438	0.192246	3906	tags=39%, list=20%, signal=31%	POLQ/REV1/POLM/POLD2/PRIMPOL/REV3L/POLA2/POLE3/POLE2
GO_CHROMATIN_REMODELING_AT_CENTROMERE	GO_CHROMATIN_REMODELING_AT_CENTROMERE	GO_CHROMATIN_REMODELING_AT_CENTROMERE	29	-0.620258	-1.54066	0.0113086	0.102305	3565	tags=52%, list=19%, signal=42%	CENPV/CENPP/CENPC/CENPO/CENPM/CENPQ/CENPT/CENPX/CENPI/HELLS/OIP5/MIS18BP1/RUVBL1/POLE3/NASP
GO_TRNA_BINDING	GO_TRNA_BINDING	GO_TRNA_BINDING	44	-0.619053	-1.64893	0.0031348	0.0810766	3075	tags=48%, list=16%, signal=40%	IGHMBP2/TRMT10B/HSD17B10/SSB/SEPSECS/ALKBH8/AARS2/XPO5/YARS2/FARSA/NSUN6/TRMU/CTU2/FARS2/ELP3/TRNT1/TRMT1L/NSUN2/TRMT10C/METTL1/PUS1
GO_REGULATION_OF_NUCLEASE_ACTIVITY	GO_REGULATION_OF_NUCLEASE_ACTIVITY	GO_REGULATION_OF_NUCLEASE_ACTIVITY	21	-0.618163	-1.42245	0.0447761	0.217041	3127	tags=48%, list=16%, signal=40%	AKT1/PRKCD/HMGB1/SIRT1/DFFA/TERF2/TERF1/OASL/PCNA/ABCE1
GO_VITAMIN_BIOSYNTHETIC_PROCESS	GO_VITAMIN_BIOSYNTHETIC_PROCESS	GO_VITAMIN_BIOSYNTHETIC_PROCESS	23	-0.615659	-1.4552	0.0444811	0.216157	2500	tags=30%, list=13%, signal=27%	PNPO/PDXK/CYP27B1/AKR1A1/MMACHC/UBIAD1/CYP2R1
GO_DNA_REPLICATION_INDEPENDENT_NUCLEOSOME_ORGANIZATION	GO_DNA_REPLICATION_INDEPENDENT_NUCLEOSOME_ORGANIZATION	GO_DNA_REPLICATION_INDEPENDENT_NUCLEOSOME_ORGANIZATION	36	-0.614673	-1.59141	0.00788644	0.0904963	3511	tags=50%, list=18%, signal=41%	CENPP/HAT1/CENPC/CENPO/CENPM/CENPQ/CENPT/CENPX/CENPI/ASF1B/OIP5/SUPT16H/UBN1/MIS18BP1/ASF1A/RUVBL1/POLE3/NASP
GO_RNA_3_END_PROCESSING	GO_RNA_3_END_PROCESSING	GO_RNA_3_END_PROCESSING	135	-0.614619	-1.90348	0.00133869	0.0810766	3119	tags=47%, list=16%, signal=40%	PARN/PAPOLG/ZC3H3/PAPOLA/HSD17B10/SSB/PNPT1/EXOSC9/PABPC1L/BARD1/THOC1/LEO1/SRRM1/CHTOP/CPSF3/THOC5/CDK9/TUT7/U2AF1/ELAC2/INTS12/SUPV3L1/VIRMA/SSU72/INTS14/NUDT21/DHX36/EXOSC3/USB1/SLBP/CSTF2T/POLR3K/TUT4/MAGOH/CLP1/MTPAP/TRNT1/POLR2D/CTR9/CSTF3/CPSF6/MAGOHB/EXOSC10/ZC3H14/CSTF2/GRSF1/RPRD2/TOE1/ZNF473/DKC1/PCF11/SRSF3/SRSF1/EXOSC4/SRSF6/DDX39A/SRSF7/INTS5/TRMT10C/CCNB1/CPSF4/EXOSC2/SRSF2/SRSF5
GO_NADH_DEHYDROGENASE_COMPLEX	GO_NADH_DEHYDROGENASE_COMPLEX	GO_NADH_DEHYDROGENASE_COMPLEX	38	-0.614281	-1.60202	0.00784929	0.0904963	1992	tags=53%, list=10%, signal=47%	NDUFA13/NDUFB8/NDUFS7/NDUFA3/NDUFB7/NDUFB5/NDUFA2/NDUFB3/NDUFB9/NDUFS3/NDUFS5/NDUFS8/NDUFAF1/NDUFA4/NDUFV3/NDUFB6/FOXRED1/NDUFS2/NDUFA6/NDUFA8
GO_PROTEIN_LOCALIZATION_TO_CHROMOSOME_CENTROMERIC_REGION	GO_PROTEIN_LOCALIZATION_TO_CHROMOSOME_CENTROMERIC_REGION	GO_PROTEIN_LOCALIZATION_TO_CHROMOSOME_CENTROMERIC_REGION	20	-0.613965	-1.39531	0.048414	0.226712	1361	tags=50%, list=7%, signal=47%	HASPIN/TTK/CENPQ/MTBP/MIS12/BUB3/SPDL1/CHAMP1/TRAPPC12/RCC2
GO_MODIFIED_AMINO_ACID_TRANSPORT	GO_MODIFIED_AMINO_ACID_TRANSPORT	GO_MODIFIED_AMINO_ACID_TRANSPORT	24	-0.612003	-1.46528	0.0432	0.212311	2438	tags=29%, list=13%, signal=26%	SLC6A8/SLC46A1/SLC19A1/SLC9A3R1/SLC22A5/CTNS/SLC5A6
GO_PEPTIDE_TRANSMEMBRANE_TRANSPORTER_ACTIVITY	GO_PEPTIDE_TRANSMEMBRANE_TRANSPORTER_ACTIVITY	GO_PEPTIDE_TRANSMEMBRANE_TRANSPORTER_ACTIVITY	29	-0.611433	-1.51874	0.0177706	0.131931	1065	tags=21%, list=6%, signal=20%	TOMM40L/SLC15A4/TOMM40/DISP1/TIMM22/TIMM23
GO_NUCLEOCYTOPLASMIC_CARRIER_ACTIVITY	GO_NUCLEOCYTOPLASMIC_CARRIER_ACTIVITY	GO_NUCLEOCYTOPLASMIC_CARRIER_ACTIVITY	29	-0.611194	-1.51815	0.0177706	0.131931	3445	tags=48%, list=18%, signal=40%	RANBP6/HIKESHI/KPNA6/KPNA2/TMCO6/XPO1/IPO11/XPO5/CSE1L/NUP214/SNUPN/IPO9/EIF4ENIF1/XPO4
GO_REGULATION_OF_TRANSCRIPTION_BY_RNA_POLYMERASE_I	GO_REGULATION_OF_TRANSCRIPTION_BY_RNA_POLYMERASE_I	GO_REGULATION_OF_TRANSCRIPTION_BY_RNA_POLYMERASE_I	28	-0.610678	-1.50569	0.0210356	0.144374	3067	tags=54%, list=16%, signal=45%	WDR43/HEATR1/RASL11A/UBTF/ERBB2/NCL/MTOR/WDR75/DHX33/ZMPSTE24/POLR2L/PWP1/UTP15/TAF1C/NOL11
GO_REGULATION_OF_ANDROGEN_RECEPTOR_SIGNALING_PATHWAY	GO_REGULATION_OF_ANDROGEN_RECEPTOR_SIGNALING_PATHWAY	GO_REGULATION_OF_ANDROGEN_RECEPTOR_SIGNALING_PATHWAY	25	-0.609401	-1.4782	0.0376766	0.195957	3320	tags=52%, list=17%, signal=43%	FOXH1/ARRB2/SAFB2/PARK7/DAB2/SIRT1/HDAC1/PIAS2/RNF14/PHB/DDX5/TRIM68/HEYL
GO_EXORIBONUCLEASE_COMPLEX	GO_EXORIBONUCLEASE_COMPLEX	GO_EXORIBONUCLEASE_COMPLEX	25	-0.6082	-1.47529	0.0376766	0.195957	3142	tags=48%, list=16%, signal=40%	LAS1L/PNPT1/EXOSC9/MPHOSPH6/SUPV3L1/EXOSC3/ZFC3H1/EXOSC10/WDR74/EXOSC4/DIS3L/EXOSC2
GO_SMALL_NUCLEAR_RIBONUCLEOPROTEIN_COMPLEX	GO_SMALL_NUCLEAR_RIBONUCLEOPROTEIN_COMPLEX	GO_SMALL_NUCLEAR_RIBONUCLEOPROTEIN_COMPLEX	60	-0.607189	-1.68673	0.00294118	0.0810766	3580	tags=37%, list=19%, signal=30%	SNRPF/LSM10/SNRPG/SNRPD1/LSM8/DDX23/ARFGEF1/SNRPB2/SNRPC/LUC7L3/PHF5A/SF3A3/SNRPA1/SF3B5/SNRPB/SNU13/PRPF31/SNRNP40/EFTUD2/CD2BP2/PRPF4/GEMIN4
GO_DAMAGED_DNA_BINDING	GO_DAMAGED_DNA_BINDING	GO_DAMAGED_DNA_BINDING	58	-0.606459	-1.67895	0.00298063	0.0810766	4259	tags=55%, list=22%, signal=43%	RAD18/DDB2/XRCC5/AUNIP/POLQ/PNKP/REV1/FANCG/RPA1/OGG1/MSH6/HMGB1/DDB1/RPA3/NEIL2/XRCC6/NEIL3/WRN/KDM4D/ERCC2/TP53BP1/RPA2/BRCA1/PCNA/DCLRE1A/UNG/ERCC3/FEN1/XPC/APTX/BLM/TDG
GO_MLL1_2_COMPLEX	GO_MLL1_2_COMPLEX	GO_MLL1_2_COMPLEX	26	-0.60629	-1.48092	0.0316957	0.178817	3982	tags=54%, list=21%, signal=43%	TAF1/PELP1/MGA/LAS1L/HCFC1/INO80C/RBBP5/TAF4/CHD8/PRPF31/ASH2L/MCRS1/WDR5/RUVBL1
GO_TRANSFERASE_ACTIVITY_TRANSFERRING_ONE_CARBON_GROUPS	GO_TRANSFERASE_ACTIVITY_TRANSFERRING_ONE_CARBON_GROUPS	GO_TRANSFERASE_ACTIVITY_TRANSFERRING_ONE_CARBON_GROUPS	197	-0.606279	-1.9634	0.00126422	0.0810766	2841	tags=39%, list=15%, signal=34%	SETD1B/ALKBH8/EZH2/METTL21A/MTR/METTL6/METTL23/TRMT2A/NDUFAF5/PRDM16/WDR4/NSUN5/RAMAC/TRMT6/COQ5/TRMO/NSUN5P1/RBBP5/NTMT1/COQ3/SUZ12/COMT/CXXC1/CMTR2/METTL18/GCSH/THUMPD3/ATIC/TRMT44/SETDB1/METTL7B/EEF1AKMT1/NSUN6/TFB2M/METTL25/CMTR1/SMYD4/MRM1/SETD6/TRDMT1/MTFMT/METTL3/ICMT/FAM98A/PRMT7/CIAPIN1/ASH2L/GART/EMG1/WDR5/MEN1/TRMT1L/EED/METTL2A/TRMT61A/TRMT61B/FAM86B1/METTL22/PRMT3/FTSJ3/DNMT3B/EEF2KM…
GO_RNA_HELICASE_ACTIVITY	GO_RNA_HELICASE_ACTIVITY	GO_RNA_HELICASE_ACTIVITY	70	-0.605893	-1.72293	0.00147275	0.0810766	3287	tags=49%, list=17%, signal=40%	DDX27/AQR/DDX3X/DHX9/IGHMBP2/DDX46/DDX20/DDX23/DHX35/DDX54/DDX60/G3BP1/DDX24/SUPV3L1/IFIH1/DDX51/DHX30/DDX21/DHX36/DHX33/DHX37/DHX29/DDX18/DDX1/DDX55/YTHDC2/DDX19A/DDX5/DDX52/DDX31/DDX42/DDX39A/DDX56/DDX28
GO_HELICASE_ACTIVITY	GO_HELICASE_ACTIVITY	GO_HELICASE_ACTIVITY	150	-0.602676	-1.89375	0.00130378	0.0810766	3496	tags=48%, list=18%, signal=40%	CHD7/MCM8/DDX27/CDC45/HELB/AQR/CHD6/DDX3X/CHTF18/DHX9/IGHMBP2/DDX46/DDX20/HELQ/DDX23/DHX35/CHTF8/DDX54/FBH1/DDX60/MCM5/RFC5/GTF2F2/G3BP1/MCM4/DDX24/HELZ2/SUPV3L1/XRCC6/CHD8/CHD1/HLTF/RFC4/WRN/IFIH1/DDX51/ERCC2/DHX30/DDX21/DHX36/RECQL5/HELLS/GINS4/RFC2/MCM7/DHX33/DHX37/DHX29/DICER1/ERCC6L/GINS2/DDX18/MCM3/DDX1/EP400/DDX55/RUVBL1/YTHDC2/DDX19A/MCM6/ERCC3/DDX5/DDX52/DDX31/BLM/DDX42/DDX39A/DDX56/SMAR…
GO_MITOGEN_ACTIVATED_PROTEIN_KINASE_BINDING	GO_MITOGEN_ACTIVATED_PROTEIN_KINASE_BINDING	GO_MITOGEN_ACTIVATED_PROTEIN_KINASE_BINDING	24	0.600812	1.54567	0.0265252	0.164604	1873	tags=42%, list=10%, signal=38%	TNIP1/DUSP1/NBR1/MAPKAPK2/DUSP10/MAPK7/IQGAP1/NFATC1/ABL1/ACE
GO_NEGATIVE_REGULATION_OF_NERVOUS_SYSTEM_PROCESS	GO_NEGATIVE_REGULATION_OF_NERVOUS_SYSTEM_PROCESS	GO_NEGATIVE_REGULATION_OF_NERVOUS_SYSTEM_PROCESS	25	0.601125	1.54298	0.0273973	0.16681	2022	tags=24%, list=11%, signal=22%	EIF4A3/EIF2AK3/CACNB3/KLK8/PTEN/TMEM98
GO_IMMUNOGLOBULIN_SECRETION	GO_IMMUNOGLOBULIN_SECRETION	GO_IMMUNOGLOBULIN_SECRETION	21	0.601908	1.51485	0.047619	0.22606	1768	tags=24%, list=9%, signal=22%	GPI/XBP1/TNFSF13B/HLA-E/IL6
GO_RESPONSE_TO_CADMIUM_ION	GO_RESPONSE_TO_CADMIUM_ION	GO_RESPONSE_TO_CADMIUM_ION	56	0.602469	1.81182	0.00607903	0.0857006	2073	tags=34%, list=11%, signal=30%	JUN/EGFR/SLC30A1/CDKN1B/MT1X/FOS/MT1F/HMOX1/MT2A/MT1A/NPC1/GSN/CDK1/MT1E/ERCC1/MAPK1/MAPK9/AKR1C3/MAPK3
GO_DOPAMINERGIC_NEURON_DIFFERENTIATION	GO_DOPAMINERGIC_NEURON_DIFFERENTIATION	GO_DOPAMINERGIC_NEURON_DIFFERENTIATION	36	0.602749	1.67577	0.0108696	0.101034	1600	tags=17%, list=8%, signal=15%	NR4A2/GSK3B/VEGFA/MANF/CSNK1E/RSPO2
GO_POSITIVE_REGULATION_OF_GRANULOCYTE_CHEMOTAXIS	GO_POSITIVE_REGULATION_OF_GRANULOCYTE_CHEMOTAXIS	GO_POSITIVE_REGULATION_OF_GRANULOCYTE_CHEMOTAXIS	22	0.603363	1.52877	0.0304569	0.177009	1972	tags=23%, list=10%, signal=20%	CXCL8/CAMK1D/RAC2/MDK/S100A14
GO_P38MAPK_CASCADE	GO_P38MAPK_CASCADE	GO_P38MAPK_CASCADE	50	0.603364	1.78639	0.00566572	0.0856426	884	tags=18%, list=5%, signal=17%	GADD45B/DUSP1/GADD45A/VEGFA/ZFP36/PER1/PHLPP1/MAPKAPK2/DUSP10
GO_CARBOHYDRATE_PHOSPHORYLATION	GO_CARBOHYDRATE_PHOSPHORYLATION	GO_CARBOHYDRATE_PHOSPHORYLATION	22	0.603613	1.52941	0.0304569	0.177009	1032	tags=23%, list=5%, signal=22%	PFKFB4/HK2/HK1/PFKFB3/FGGY
GO_REGULATION_OF_INSULIN_LIKE_GROWTH_FACTOR_RECEPTOR_SIGNALING_PATHWAY	GO_REGULATION_OF_INSULIN_LIKE_GROWTH_FACTOR_RECEPTOR_SIGNALING_PATHWAY	GO_REGULATION_OF_INSULIN_LIKE_GROWTH_FACTOR_RECEPTOR_SIGNALING_PATHWAY	24	0.60374	1.55321	0.0265252	0.164604	1014	tags=17%, list=5%, signal=16%	IGFBP6/IGFBP3/IGFBP2/CDH3
GO_GLIAL_CELL_ACTIVATION	GO_GLIAL_CELL_ACTIVATION	GO_GLIAL_CELL_ACTIVATION	53	0.60388	1.78554	0.00595238	0.0857006	1768	tags=21%, list=9%, signal=19%	JUN/NAMPT/EGFR/NR1D1/LDLR/GRN/APP/PSEN1/ITGB2/AIF1/IL6
GO_TUMOR_NECROSIS_FACTOR_BIOSYNTHETIC_PROCESS	GO_TUMOR_NECROSIS_FACTOR_BIOSYNTHETIC_PROCESS	GO_TUMOR_NECROSIS_FACTOR_BIOSYNTHETIC_PROCESS	31	0.605802	1.62713	0.00808625	0.0908706	1052	tags=19%, list=5%, signal=18%	AKAP12/BCL3/ERRFI1/APP/MAPKAPK2/PSEN1
GO_EXPLORATION_BEHAVIOR	GO_EXPLORATION_BEHAVIOR	GO_EXPLORATION_BEHAVIOR	25	0.607199	1.55858	0.0273973	0.16681	933	tags=16%, list=5%, signal=15%	DLG4/GAD1/EIF4A3/PRKCE
GO_POSITIVE_REGULATION_OF_TRANSCRIPTION_FROM_RNA_POLYMERASE_II_PROMOTER_INVOLVED_IN_CELLULAR_RESPONSE_TO_CHEMICAL_STIMULUS	GO_POSITIVE_REGULATION_OF_TRANSCRIPTION_FROM_RNA_POLYMERASE_II_PROMOTER_INVOLVED_IN_CELLULAR_RESPONSE_TO_CHEMICAL_STIMULUS	GO_POSITIVE_REGULATION_OF_TRANSCRIPTION_FROM_RNA_POLYMERASE_II_PROMOTER_INVOLVED_IN_CELLULAR_RESPONSE_TO_CHEMICAL_STIMULUS	21	0.607332	1.5285	0.037594	0.195957	789	tags=24%, list=4%, signal=23%	VEGFA/ATF4/SESN2/XBP1/RBPJ
GO_REGULATION_OF_VIRAL_ENTRY_INTO_HOST_CELL	GO_REGULATION_OF_VIRAL_ENTRY_INTO_HOST_CELL	GO_REGULATION_OF_VIRAL_ENTRY_INTO_HOST_CELL	27	0.60806	1.60518	0.015748	0.123446	1965	tags=30%, list=10%, signal=27%	MID2/NECTIN2/TRIM8/LGALS1/TRIM5/GSN/P4HB/SNX3
GO_REGULATION_OF_PROTEIN_OLIGOMERIZATION	GO_REGULATION_OF_PROTEIN_OLIGOMERIZATION	GO_REGULATION_OF_PROTEIN_OLIGOMERIZATION	26	0.609807	1.58472	0.0161725	0.125474	598	tags=23%, list=3%, signal=22%	RIOK3/PMAIP1/TMC8/SH3GLB1/CLDN7/SORL1
GO_PLATELET_DERIVED_GROWTH_FACTOR_RECEPTOR_SIGNALING_PATHWAY	GO_PLATELET_DERIVED_GROWTH_FACTOR_RECEPTOR_SIGNALING_PATHWAY	GO_PLATELET_DERIVED_GROWTH_FACTOR_RECEPTOR_SIGNALING_PATHWAY	57	0.611759	1.84199	0.00606061	0.0857006	2259	tags=42%, list=12%, signal=37%	PDGFA/TIPARP/CSRNP1/VEGFA/LRIG2/CBL/PTPN2/PDGFRL/NR4A3/CBLB/RAPGEF1/PDGFD/IQGAP1/PTPN12/MYO1E/FER/ABL1/F3/PDGFB/PTEN/PDGFC/PTPN11/IFT20/NDRG4
GO_POSITIVE_REGULATION_OF_MONONUCLEAR_CELL_MIGRATION	GO_POSITIVE_REGULATION_OF_MONONUCLEAR_CELL_MIGRATION	GO_POSITIVE_REGULATION_OF_MONONUCLEAR_CELL_MIGRATION	23	0.614113	1.5854	0.0227848	0.150686	1972	tags=26%, list=10%, signal=23%	SERPINE1/ANO6/PDGFD/LGMN/AIF1/S100A14
GO_PLASMINOGEN_ACTIVATION	GO_PLASMINOGEN_ACTIVATION	GO_PLASMINOGEN_ACTIVATION	23	0.614927	1.5875	0.0227848	0.150686	533	tags=17%, list=3%, signal=17%	SERPINE1/PGK1/ANXA2/F11
GO_REGULATION_OF_HETEROTYPIC_CELL_CELL_ADHESION	GO_REGULATION_OF_HETEROTYPIC_CELL_CELL_ADHESION	GO_REGULATION_OF_HETEROTYPIC_CELL_CELL_ADHESION	24	0.614948	1.58204	0.0212202	0.145218	3662	tags=42%, list=19%, signal=34%	KLF4/MAP2K5/BMP7/MAPK7/MYADM/MBP/SKAP1/FLOT1/CD44/LCK
GO_REGULATION_OF_PROTEIN_AUTOPHOSPHORYLATION	GO_REGULATION_OF_PROTEIN_AUTOPHOSPHORYLATION	GO_REGULATION_OF_PROTEIN_AUTOPHOSPHORYLATION	43	0.615335	1.75637	0.00558659	0.0856426	2171	tags=40%, list=11%, signal=35%	PDGFA/JUN/VEGFA/ERRFI1/PPP2R5C/RASSF2/PPP2R5B/PDGFD/IQGAP1/PDGFB/CAV1/PPP2R5A/PDGFC/ACE/PPP2R5D/TOM1L1/MRE11
GO_THYMIC_T_CELL_SELECTION	GO_THYMIC_T_CELL_SELECTION	GO_THYMIC_T_CELL_SELECTION	20	0.616426	1.52974	0.0471464	0.224669	3990	tags=35%, list=21%, signal=28%	PTPN2/ATG5/GLI3/DOCK2/CD28/ZAP70/AIRE
GO_ADRENERGIC_RECEPTOR_SIGNALING_PATHWAY	GO_ADRENERGIC_RECEPTOR_SIGNALING_PATHWAY	GO_ADRENERGIC_RECEPTOR_SIGNALING_PATHWAY	34	0.616668	1.69722	0.0108108	0.101034	2064	tags=15%, list=11%, signal=13%	ARRDC3/DRD3/AKAP13/ADRA2B/ADRA2A
GO_POSITIVE_REGULATION_OF_LIPID_STORAGE	GO_POSITIVE_REGULATION_OF_LIPID_STORAGE	GO_POSITIVE_REGULATION_OF_LIPID_STORAGE	21	0.617611	1.55437	0.0275689	0.167677	2737	tags=29%, list=14%, signal=25%	HILPDA/SCARB1/SREBF2/FITM1/PLA2G10/MSR1
GO_INACTIVATION_OF_MAPK_ACTIVITY	GO_INACTIVATION_OF_MAPK_ACTIVITY	GO_INACTIVATION_OF_MAPK_ACTIVITY	25	0.61778	1.58573	0.0164384	0.127195	1895	tags=48%, list=10%, signal=43%	DUSP16/DUSP5/DUSP1/DUSP4/DUSP10/DUSP6/DUSP8/CAV1/SPRED2/DUSP9/DUSP3/MBIP
GO_CARBOHYDRATE_TRANSMEMBRANE_TRANSPORTER_ACTIVITY	GO_CARBOHYDRATE_TRANSMEMBRANE_TRANSPORTER_ACTIVITY	GO_CARBOHYDRATE_TRANSMEMBRANE_TRANSPORTER_ACTIVITY	34	0.617993	1.70087	0.0108108	0.101034	934	tags=21%, list=5%, signal=20%	SLC2A3/SLC2A1/SLC45A3/SLC45A1/TMEM144/SLC2A12/PPBP
GO_REGULATION_OF_ENDOPLASMIC_RETICULUM_STRESS_INDUCED_INTRINSIC_APOPTOTIC_SIGNALING_PATHWAY	GO_REGULATION_OF_ENDOPLASMIC_RETICULUM_STRESS_INDUCED_INTRINSIC_APOPTOTIC_SIGNALING_PATHWAY	GO_REGULATION_OF_ENDOPLASMIC_RETICULUM_STRESS_INDUCED_INTRINSIC_APOPTOTIC_SIGNALING_PATHWAY	33	0.620199	1.6914	0.00540541	0.0849754	1174	tags=30%, list=6%, signal=29%	HERPUD1/DDIT3/XBP1/PMAIP1/EIF2AK3/PTPN2/NCK1/BCL2L11/SERINC3/NCK2
GO_REGULATION_OF_MONONUCLEAR_CELL_MIGRATION	GO_REGULATION_OF_MONONUCLEAR_CELL_MIGRATION	GO_REGULATION_OF_MONONUCLEAR_CELL_MIGRATION	39	0.621217	1.75372	0.00833333	0.0913109	3186	tags=36%, list=17%, signal=30%	DUSP1/SERPINE1/ANO6/PDGFD/LGMN/MDK/AIF1/S100A14/MAPK3/LYN/PLCB1/CCR2/CXCL17/RARRES2
GO_REGULATION_OF_COAGULATION	GO_REGULATION_OF_COAGULATION	GO_REGULATION_OF_COAGULATION	80	0.621464	1.97859	0.00328947	0.0810766	2218	tags=29%, list=12%, signal=26%	PDGFA/CD34/VKORC1/PLAUR/SERPINE1/ANO6/ANXA2/TFPI/F11/PROS1/PSEN1/GP1BA/HPSE/F3/PDGFB/CAV1/PRKCA/F11R/CD9/ANXA5/F12/PROCR/LYN
GO_EPIDERMAL_GROWTH_FACTOR_RECEPTOR_BINDING	GO_EPIDERMAL_GROWTH_FACTOR_RECEPTOR_BINDING	GO_EPIDERMAL_GROWTH_FACTOR_RECEPTOR_BINDING	29	0.621513	1.66056	0.00522193	0.0843661	2851	tags=41%, list=15%, signal=35%	HBEGF/TGFA/ITGA5/SOCS5/CBL/YES1/ARF4/FER/FAM83B/GRB2/MS4A1/RNF126
GO_REGULATION_OF_NEUTROPHIL_CHEMOTAXIS	GO_REGULATION_OF_NEUTROPHIL_CHEMOTAXIS	GO_REGULATION_OF_NEUTROPHIL_CHEMOTAXIS	26	0.622649	1.61809	0.0107817	0.101034	1382	tags=19%, list=7%, signal=18%	CXCL8/CAMK1D/RAC2/MPP1/MDK
GO_NEGATIVE_REGULATION_OF_RESPONSE_TO_WOUNDING	GO_NEGATIVE_REGULATION_OF_RESPONSE_TO_WOUNDING	GO_NEGATIVE_REGULATION_OF_RESPONSE_TO_WOUNDING	85	0.623172	2.00072	0.00325733	0.0810766	2024	tags=29%, list=11%, signal=26%	PDGFA/CD34/PLAUR/SERPINE1/CDKN1B/LRIG2/CASK/ANXA2/TFPI/F11/CD109/SMAD3/PROS1/DUSP10/INPP5F/SPP1/KLK8/MDK/GP1BA/PDGFB/PTEN/CD9/ANXA5/KREMEN1/F12
GO_POSITIVE_REGULATION_OF_TUMOR_NECROSIS_FACTOR_BIOSYNTHETIC_PROCESS	GO_POSITIVE_REGULATION_OF_TUMOR_NECROSIS_FACTOR_BIOSYNTHETIC_PROCESS	GO_POSITIVE_REGULATION_OF_TUMOR_NECROSIS_FACTOR_BIOSYNTHETIC_PROCESS	19	0.623324	1.52034	0.0452261	0.218195	1052	tags=21%, list=5%, signal=20%	AKAP12/APP/MAPKAPK2/PSEN1
GO_POSITIVE_REGULATION_OF_BMP_SIGNALING_PATHWAY	GO_POSITIVE_REGULATION_OF_BMP_SIGNALING_PATHWAY	GO_POSITIVE_REGULATION_OF_BMP_SIGNALING_PATHWAY	32	0.623476	1.68947	0.0080429	0.0908706	789	tags=22%, list=4%, signal=21%	HES1/FOXD1/RNF165/PELO/TWSG1/NEO1/RBPJ
GO_CATENIN_COMPLEX	GO_CATENIN_COMPLEX	GO_CATENIN_COMPLEX	26	0.623641	1.62067	0.0107817	0.101034	1844	tags=23%, list=10%, signal=21%	CDH1/JUP/CDH3/SMAD7/CTNNA1/CDH6
GO_HETEROTYPIC_CELL_CELL_ADHESION	GO_HETEROTYPIC_CELL_CELL_ADHESION	GO_HETEROTYPIC_CELL_CELL_ADHESION	59	0.6245	1.90077	0.00600601	0.0857006	1876	tags=31%, list=10%, signal=28%	CD2/CXADR/KLF4/ITGA5/JUP/MAP2K5/DSP/BMP7/ITGB1/MAPK7/PARVA/DSC2/ITGB2/PERP/MYADM/MBP/PKP2/DSG2
GO_CELLULAR_RESPONSE_TO_COPPER_ION	GO_CELLULAR_RESPONSE_TO_COPPER_ION	GO_CELLULAR_RESPONSE_TO_COPPER_ION	24	0.625705	1.60971	0.0159151	0.124079	1450	tags=25%, list=8%, signal=23%	MT1X/APP/MT1F/MT2A/MT1A/MT1E
GO_CYTOPLASMIC_MRNA_PROCESSING_BODY_ASSEMBLY	GO_CYTOPLASMIC_MRNA_PROCESSING_BODY_ASSEMBLY	GO_CYTOPLASMIC_MRNA_PROCESSING_BODY_ASSEMBLY	20	0.626212	1.55403	0.0397022	0.201441	2517	tags=40%, list=13%, signal=35%	NOCT/PATL1/CNOT6L/ATXN2L/CNOT1/DYNC1H1/CNOT7/LIMD1
GO_POSITIVE_REGULATION_OF_SODIUM_ION_TRANSMEMBRANE_TRANSPORT	GO_POSITIVE_REGULATION_OF_SODIUM_ION_TRANSMEMBRANE_TRANSPORT	GO_POSITIVE_REGULATION_OF_SODIUM_ION_TRANSMEMBRANE_TRANSPORT	21	0.626323	1.5763	0.0225564	0.149864	2257	tags=33%, list=12%, signal=29%	GLRX/ATP1B1/ARF1/KIF5B/DNM2/ACTN4/DMD
GO_LEUKOCYTE_ACTIVATION_INVOLVED_IN_INFLAMMATORY_RESPONSE	GO_LEUKOCYTE_ACTIVATION_INVOLVED_IN_INFLAMMATORY_RESPONSE	GO_LEUKOCYTE_ACTIVATION_INVOLVED_IN_INFLAMMATORY_RESPONSE	43	0.627192	1.79022	0.00558659	0.0856426	1768	tags=21%, list=9%, signal=19%	JUN/NAMPT/NR1D1/LDLR/GRN/APP/ITGB2/AIF1/IL6
GO_REGULATION_OF_T_CELL_MEDIATED_CYTOTOXICITY	GO_REGULATION_OF_T_CELL_MEDIATED_CYTOTOXICITY	GO_REGULATION_OF_T_CELL_MEDIATED_CYTOTOXICITY	29	0.627631	1.67691	0.00522193	0.0843661	1814	tags=24%, list=9%, signal=22%	NECTIN2/MICA/HLA-G/MICB/HLA-H/HLA-E/STX7
GO_NEGATIVE_REGULATION_OF_NEUROINFLAMMATORY_RESPONSE	GO_NEGATIVE_REGULATION_OF_NEUROINFLAMMATORY_RESPONSE	GO_NEGATIVE_REGULATION_OF_NEUROINFLAMMATORY_RESPONSE	18	0.627646	1.50695	0.0482234	0.226712	461	tags=17%, list=2%, signal=16%	NR1D1/LDLR/GRN
GO_MEMBRANE_RAFT_ORGANIZATION	GO_MEMBRANE_RAFT_ORGANIZATION	GO_MEMBRANE_RAFT_ORGANIZATION	24	0.628153	1.61601	0.0159151	0.124079	1566	tags=38%, list=8%, signal=34%	CD2/S100A10/ANXA2/NPC1/GSN/PACSIN2/ABCA7/CAV1/MYADM
GO_RESPIRATORY_BURST	GO_RESPIRATORY_BURST	GO_RESPIRATORY_BURST	29	0.628158	1.67831	0.00522193	0.0843661	1642	tags=31%, list=9%, signal=28%	SELENOK/GRN/CAMK1D/PGAM1/RAC2/DUSP10/CD55/NOXO1/CD24
GO_NEUROTRANSMITTER_RECEPTOR_LOCALIZATION_TO_POSTSYNAPTIC_SPECIALIZATION_MEMBRANE	GO_NEUROTRANSMITTER_RECEPTOR_LOCALIZATION_TO_POSTSYNAPTIC_SPECIALIZATION_MEMBRANE	GO_NEUROTRANSMITTER_RECEPTOR_LOCALIZATION_TO_POSTSYNAPTIC_SPECIALIZATION_MEMBRANE	20	0.629437	1.56203	0.0347395	0.188211	2731	tags=35%, list=14%, signal=30%	DLG4/GPC4/GPHN/GPC6/PRKCZ/DAG1/HRAS
GO_LAMININ_BINDING	GO_LAMININ_BINDING	GO_LAMININ_BINDING	26	0.630104	1.63746	0.0107817	0.101034	2463	tags=38%, list=13%, signal=34%	PLEKHA2/LGALS1/ITGA6/ITGB1/ADAM9/LYPD5/RPSA/SSC5D/DAG1/ADGRG6
GO_REGULATION_OF_MICROGLIAL_CELL_ACTIVATION	GO_REGULATION_OF_MICROGLIAL_CELL_ACTIVATION	GO_REGULATION_OF_MICROGLIAL_CELL_ACTIVATION	19	0.633109	1.5442	0.040201	0.203433	1768	tags=21%, list=9%, signal=19%	NR1D1/LDLR/GRN/IL6
GO_M_BAND	GO_M_BAND	GO_M_BAND	22	0.633194	1.60436	0.0203046	0.141986	397	tags=14%, list=2%, signal=13%	FHL2/ALDOA/NBR1
GO_OXIDOREDUCTASE_ACTIVITY_ACTING_ON_SINGLE_DONORS_WITH_INCORPORATION_OF_MOLECULAR_OXYGEN	GO_OXIDOREDUCTASE_ACTIVITY_ACTING_ON_SINGLE_DONORS_WITH_INCORPORATION_OF_MOLECULAR_OXYGEN	GO_OXIDOREDUCTASE_ACTIVITY_ACTING_ON_SINGLE_DONORS_WITH_INCORPORATION_OF_MOLECULAR_OXYGEN	25	0.633542	1.62619	0.0109589	0.101141	1821	tags=20%, list=9%, signal=18%	P4HA1/P4HA2/PTGS2/TMLHE/IDO2
GO_PROTEIN_COMPLEX_INVOLVED_IN_CELL_ADHESION	GO_PROTEIN_COMPLEX_INVOLVED_IN_CELL_ADHESION	GO_PROTEIN_COMPLEX_INVOLVED_IN_CELL_ADHESION	31	0.633746	1.70218	0.00539084	0.0849754	1252	tags=23%, list=7%, signal=21%	ITGB5/ITGA5/ITGB4/ITGA6/ITGB1/NPNT/ITGB2
GO_PHAGOPHORE_ASSEMBLY_SITE	GO_PHAGOPHORE_ASSEMBLY_SITE	GO_PHAGOPHORE_ASSEMBLY_SITE	25	0.634232	1.62796	0.0109589	0.101141	1573	tags=28%, list=8%, signal=26%	WDR45B/NBR1/ATG101/ATG5/ATG9A/ZFYVE1/ATG14
GO_TYPE_B_PANCREATIC_CELL_PROLIFERATION	GO_TYPE_B_PANCREATIC_CELL_PROLIFERATION	GO_TYPE_B_PANCREATIC_CELL_PROLIFERATION	21	0.634363	1.59653	0.0200501	0.141986	1435	tags=33%, list=7%, signal=31%	NR4A1/NR1D1/ERRFI1/IGFBP3/SERPINB1/NR4A3/BAD
GO_POSITIVE_REGULATION_OF_RESPONSE_TO_ENDOPLASMIC_RETICULUM_STRESS	GO_POSITIVE_REGULATION_OF_RESPONSE_TO_ENDOPLASMIC_RETICULUM_STRESS	GO_POSITIVE_REGULATION_OF_RESPONSE_TO_ENDOPLASMIC_RETICULUM_STRESS	38	0.63753	1.79062	0.00547945	0.0852082	1489	tags=34%, list=8%, signal=32%	HERPUD1/DDIT3/PPP1R15A/UBQLN1/XBP1/PMAIP1/PTPN2/NCK1/BAG6/BCL2L11/SERINC3/NCK2/CAV1
GO_CELLULAR_RESPONSE_TO_ZINC_ION	GO_CELLULAR_RESPONSE_TO_ZINC_ION	GO_CELLULAR_RESPONSE_TO_ZINC_ION	20	0.638302	1.58403	0.0248139	0.158459	3164	tags=40%, list=16%, signal=33%	MT1X/MT1F/MT2A/MT1A/MT1E/ATP13A2/MT1M/MT1G
GO_CELLULAR_RESPONSE_TO_AMYLOID_BETA	GO_CELLULAR_RESPONSE_TO_AMYLOID_BETA	GO_CELLULAR_RESPONSE_TO_AMYLOID_BETA	40	0.638326	1.80992	0.00278552	0.0810766	1523	tags=22%, list=8%, signal=21%	GSK3B/NAMPT/BCL2L2/APP/IGF1R/BCL2L11/PSEN1/LGMN/ABCC1
GO_POSITIVE_REGULATION_OF_COAGULATION	GO_POSITIVE_REGULATION_OF_COAGULATION	GO_POSITIVE_REGULATION_OF_COAGULATION	26	0.638795	1.66005	0.0107817	0.101034	2024	tags=27%, list=11%, signal=24%	SERPINE1/ANO6/PSEN1/HPSE/F3/F11R/F12
GO_DESMOSOME	GO_DESMOSOME	GO_DESMOSOME	23	0.639254	1.6503	0.0151899	0.120549	1876	tags=35%, list=10%, signal=31%	JUP/PNN/DSP/DSC2/PPL/PERP/PKP2/DSG2
GO_EXOGENOUS_PROTEIN_BINDING	GO_EXOGENOUS_PROTEIN_BINDING	GO_EXOGENOUS_PROTEIN_BINDING	69	0.640724	2.01171	0.00303951	0.0810766	2414	tags=35%, list=13%, signal=31%	CXADR/EGFR/EPHA2/ITGB5/ITGA5/LDLR/NECTIN2/SCARB1/CXCR4/ITGB1/CD55/NPC1/AXL/CDK1/XPR1/RPSA/CLEC4M/F11R/CR2/CD46/CLDN1/CR1/EFNB2/DAG1
GO_REGULATION_OF_LAMELLIPODIUM_ASSEMBLY	GO_REGULATION_OF_LAMELLIPODIUM_ASSEMBLY	GO_REGULATION_OF_LAMELLIPODIUM_ASSEMBLY	32	0.642139	1.74004	0.00536193	0.0849754	1737	tags=34%, list=9%, signal=31%	EPHA2/WASF2/RAC2/CLRN1/FER/ARPC2/CAPZB/DNM2/BRK1/TWF1/CDC42
GO_REGULATION_OF_SYSTEMIC_ARTERIAL_BLOOD_PRESSURE_BY_RENIN_ANGIOTENSIN	GO_REGULATION_OF_SYSTEMIC_ARTERIAL_BLOOD_PRESSURE_BY_RENIN_ANGIOTENSIN	GO_REGULATION_OF_SYSTEMIC_ARTERIAL_BLOOD_PRESSURE_BY_RENIN_ANGIOTENSIN	23	0.644212	1.6631	0.0126582	0.108495	3243	tags=30%, list=17%, signal=25%	DRD3/PCSK5/ENPEP/ACE/ATP6AP2/GJA5/CTSZ
GO_CELLULAR_RESPONSE_TO_LOW_DENSITY_LIPOPROTEIN_PARTICLE_STIMULUS	GO_CELLULAR_RESPONSE_TO_LOW_DENSITY_LIPOPROTEIN_PARTICLE_STIMULUS	GO_CELLULAR_RESPONSE_TO_LOW_DENSITY_LIPOPROTEIN_PARTICLE_STIMULUS	20	0.644829	1.60023	0.0173697	0.129456	2990	tags=55%, list=16%, signal=46%	LDLR/HMGCS1/SOCS5/ITGB1/SREBF2/NPC1/ITGB2/CD9/MIR302A/PPARG/FGF21
GO_MIDDLE_EAR_MORPHOGENESIS	GO_MIDDLE_EAR_MORPHOGENESIS	GO_MIDDLE_EAR_MORPHOGENESIS	19	0.644865	1.57288	0.0326633	0.181931	34	tags=11%, list=0%, signal=11%	INSIG2/INSIG1
GO_SMOOTH_ENDOPLASMIC_RETICULUM	GO_SMOOTH_ENDOPLASMIC_RETICULUM	GO_SMOOTH_ENDOPLASMIC_RETICULUM	34	0.645703	1.77714	0.00540541	0.0849754	2424	tags=32%, list=13%, signal=28%	HSPA5/DNAJC3/MYO1D/CANX/APP/MYO5A/RPL10/PSEN1/RYR1/CALR/HYOU1
GO_CELL_PROLIFERATION_INVOLVED_IN_HEART_MORPHOGENESIS	GO_CELL_PROLIFERATION_INVOLVED_IN_HEART_MORPHOGENESIS	GO_CELL_PROLIFERATION_INVOLVED_IN_HEART_MORPHOGENESIS	17	0.646008	1.54356	0.039312	0.200306	789	tags=24%, list=4%, signal=23%	HES1/PIM1/SOX9/RBPJ
GO_NEURON_PROJECTION_REGENERATION	GO_NEURON_PROJECTION_REGENERATION	GO_NEURON_PROJECTION_REGENERATION	57	0.647761	1.9504	0.0030303	0.0810766	2451	tags=32%, list=13%, signal=28%	ADM/JUN/LRIG2/KLF4/MAP2K1/GRN/NDEL1/INPP5F/SPP1/STK24/KLK8/PTEN/CTNNA1/PTPRF/KREMEN1/MAPK8IP3/DAG1/LAMB2
GO_INHIBITORY_SYNAPSE	GO_INHIBITORY_SYNAPSE	GO_INHIBITORY_SYNAPSE	17	0.650541	1.55439	0.036855	0.193478	749	tags=12%, list=4%, signal=11%	GAD1/CEP112
GO_MEMBRANE_REPOLARIZATION_DURING_ACTION_POTENTIAL	GO_MEMBRANE_REPOLARIZATION_DURING_ACTION_POTENTIAL	GO_MEMBRANE_REPOLARIZATION_DURING_ACTION_POTENTIAL	28	0.650906	1.7294	0.00520833	0.0843661	2408	tags=32%, list=13%, signal=28%	CACNB3/ATP1B1/ATP1A1/KCNH2/CAV1/FLNA/KCNE5/YWHAE/KCNA5
GO_ZYMOGEN_ACTIVATION	GO_ZYMOGEN_ACTIVATION	GO_ZYMOGEN_ACTIVATION	47	0.652118	1.89902	0.00564972	0.0856426	1490	tags=28%, list=8%, signal=26%	SERPINE1/TBC1D10A/PGK1/ANXA2/F11/ASPH/CYFIP2/LGMN/PRSS12/PERP/BAD/PRSS3/CTSH
GO_NEGATIVE_REGULATION_OF_CYTOSOLIC_CALCIUM_ION_CONCENTRATION	GO_NEGATIVE_REGULATION_OF_CYTOSOLIC_CALCIUM_ION_CONCENTRATION	GO_NEGATIVE_REGULATION_OF_CYTOSOLIC_CALCIUM_ION_CONCENTRATION	17	0.652474	1.55901	0.034398	0.186713	3008	tags=29%, list=16%, signal=25%	DRD3/SMAD3/KCNA5/ATP2B1/GTF2I
GO_ANTIGEN_PROCESSING_AND_PRESENTATION_OF_ENDOGENOUS_PEPTIDE_ANTIGEN	GO_ANTIGEN_PROCESSING_AND_PRESENTATION_OF_ENDOGENOUS_PEPTIDE_ANTIGEN	GO_ANTIGEN_PROCESSING_AND_PRESENTATION_OF_ENDOGENOUS_PEPTIDE_ANTIGEN	16	0.653485	1.54315	0.046683	0.223494	1254	tags=31%, list=7%, signal=29%	MICA/HLA-G/MICB/HLA-H/HLA-E
GO_14_3_3_PROTEIN_BINDING	GO_14_3_3_PROTEIN_BINDING	GO_14_3_3_PROTEIN_BINDING	30	0.659118	1.76701	0.00530504	0.0847876	2140	tags=47%, list=11%, signal=42%	DDIT4/ZFP36/SIK1/IRS2/TBC1D22A/PI4KB/PRKCE/PPP1R12A/BAD/FOXK1/RPTOR/ZFP36L1/RBM7/PRKCZ
GO_CHEMOKINE_BIOSYNTHETIC_PROCESS	GO_CHEMOKINE_BIOSYNTHETIC_PROCESS	GO_CHEMOKINE_BIOSYNTHETIC_PROCESS	15	0.661705	1.52672	0.0484262	0.226712	1768	tags=27%, list=9%, signal=24%	APP/EGR1/HMOX1/IL6
GO_ANTIGEN_PROCESSING_AND_PRESENTATION_OF_ENDOGENOUS_ANTIGEN	GO_ANTIGEN_PROCESSING_AND_PRESENTATION_OF_ENDOGENOUS_ANTIGEN	GO_ANTIGEN_PROCESSING_AND_PRESENTATION_OF_ENDOGENOUS_ANTIGEN	21	0.661891	1.66581	0.0125313	0.108181	1254	tags=29%, list=7%, signal=27%	MICA/ATG5/HLA-G/MICB/HLA-H/HLA-E
GO_POSITIVE_REGULATION_OF_ERAD_PATHWAY	GO_POSITIVE_REGULATION_OF_ERAD_PATHWAY	GO_POSITIVE_REGULATION_OF_ERAD_PATHWAY	15	0.662989	1.52968	0.0484262	0.226712	1489	tags=27%, list=8%, signal=25%	HERPUD1/UBQLN1/BAG6/CAV1
GO_ASTROCYTE_ACTIVATION	GO_ASTROCYTE_ACTIVATION	GO_ASTROCYTE_ACTIVATION	25	0.663037	1.7019	0.00821918	0.0912215	2625	tags=36%, list=14%, signal=31%	EGFR/NR1D1/LDLR/GRN/APP/PSEN1/IL6/BACE2/MAPT
GO_ROUGH_ENDOPLASMIC_RETICULUM_MEMBRANE	GO_ROUGH_ENDOPLASMIC_RETICULUM_MEMBRANE	GO_ROUGH_ENDOPLASMIC_RETICULUM_MEMBRANE	27	0.664337	1.75374	0.00787402	0.0904963	1687	tags=33%, list=9%, signal=30%	PLOD2/PLOD1/DERL2/MACO1/PI4KB/CCDC47/SEC63/ARL6IP1/RPS29
GO_GLUCOSE_6_PHOSPHATE_METABOLIC_PROCESS	GO_GLUCOSE_6_PHOSPHATE_METABOLIC_PROCESS	GO_GLUCOSE_6_PHOSPHATE_METABOLIC_PROCESS	22	0.664878	1.68464	0.00761421	0.0892256	2988	tags=45%, list=16%, signal=38%	GPI/HK2/HK1/PGAM1/NFE2L1/TKT/HK3/PGLS/PGD/G6PD
GO_POSITIVE_REGULATION_OF_MONOCYTE_CHEMOTAXIS	GO_POSITIVE_REGULATION_OF_MONOCYTE_CHEMOTAXIS	GO_POSITIVE_REGULATION_OF_MONOCYTE_CHEMOTAXIS	18	0.665789	1.59852	0.0329949	0.182365	3151	tags=39%, list=16%, signal=33%	SERPINE1/ANO6/LGMN/AIF1/S100A14/CCR2/CXCL17
GO_REGULATION_OF_THE_FORCE_OF_HEART_CONTRACTION	GO_REGULATION_OF_THE_FORCE_OF_HEART_CONTRACTION	GO_REGULATION_OF_THE_FORCE_OF_HEART_CONTRACTION	26	0.666075	1.73094	0.00808625	0.0908706	2608	tags=23%, list=14%, signal=20%	ADM/CAMK2D/ATP1A1/CAV1/MYL2/GAA
GO_POSITIVE_REGULATION_OF_SYNAPTIC_TRANSMISSION_GLUTAMATERGIC	GO_POSITIVE_REGULATION_OF_SYNAPTIC_TRANSMISSION_GLUTAMATERGIC	GO_POSITIVE_REGULATION_OF_SYNAPTIC_TRANSMISSION_GLUTAMATERGIC	24	0.666273	1.71408	0.00795756	0.0906092	3278	tags=33%, list=17%, signal=28%	PTGS2/EGFR/STXBP1/SHANK3/ROR2/NLGN2/CCR2/PTK2B
GO_ATPASE_ACTIVATOR_ACTIVITY	GO_ATPASE_ACTIVATOR_ACTIVITY	GO_ATPASE_ACTIVATOR_ACTIVITY	22	0.666645	1.68912	0.00761421	0.0892256	1127	tags=32%, list=6%, signal=30%	DNAJB2/DNAJB1/TOR1AIP2/RAB3A/DNAJB4/ATP1B1/DNAJC1
GO_CAMP_RESPONSE_ELEMENT_BINDING	GO_CAMP_RESPONSE_ELEMENT_BINDING	GO_CAMP_RESPONSE_ELEMENT_BINDING	14	0.667515	1.51477	0.0487805	0.22763	1498	tags=36%, list=8%, signal=33%	JUN/ATF2/NR4A3/CREB3L2/TCF12
GO_POSITIVE_REGULATION_OF_SODIUM_ION_TRANSMEMBRANE_TRANSPORTER_ACTIVITY	GO_POSITIVE_REGULATION_OF_SODIUM_ION_TRANSMEMBRANE_TRANSPORTER_ACTIVITY	GO_POSITIVE_REGULATION_OF_SODIUM_ION_TRANSMEMBRANE_TRANSPORTER_ACTIVITY	16	0.668723	1.57914	0.031941	0.179999	3024	tags=44%, list=16%, signal=37%	GLRX/ATP1B1/KIF5B/DNM2/ACTN4/DMD/CHP1
GO_ADRENERGIC_RECEPTOR_ACTIVITY	GO_ADRENERGIC_RECEPTOR_ACTIVITY	GO_ADRENERGIC_RECEPTOR_ACTIVITY	19	0.672722	1.64082	0.0150754	0.119971	2064	tags=16%, list=11%, signal=14%	DRD3/ADRA2B/ADRA2A
GO_REGULATION_OF_RESPIRATORY_BURST	GO_REGULATION_OF_RESPIRATORY_BURST	GO_REGULATION_OF_RESPIRATORY_BURST	14	0.674393	1.53038	0.0487805	0.22763	1217	tags=36%, list=6%, signal=33%	GRN/CAMK1D/RAC2/DUSP10/NOXO1
GO_REGULATION_OF_CARDIAC_MUSCLE_CELL_ACTION_POTENTIAL	GO_REGULATION_OF_CARDIAC_MUSCLE_CELL_ACTION_POTENTIAL	GO_REGULATION_OF_CARDIAC_MUSCLE_CELL_ACTION_POTENTIAL	32	0.675042	1.8292	0.00536193	0.0849754	4328	tags=59%, list=22%, signal=46%	CXADR/BIN1/JUP/DSP/CAMK2D/DSC2/HCN4/CAV1/PKP2/DSG2/FLNA/GJA5/CACNA1C/SLMAP/FGF13/RYR2/CTNNA3/ANK2/NOS1AP
GO_FIBRINOLYSIS	GO_FIBRINOLYSIS	GO_FIBRINOLYSIS	26	0.675213	1.75469	0.00539084	0.0849754	2024	tags=27%, list=11%, signal=24%	PLAUR/SERPINE1/ANXA2/F11/PROS1/GP1BA/F12
GO_CARBOHYDRATE_KINASE_ACTIVITY	GO_CARBOHYDRATE_KINASE_ACTIVITY	GO_CARBOHYDRATE_KINASE_ACTIVITY	21	0.675811	1.70085	0.0075188	0.0891975	1032	tags=33%, list=5%, signal=32%	PFKFB4/HK2/PFKP/HK1/PFKFB3/PFKL/FGGY
GO_NEGATIVE_REGULATION_OF_ASTROCYTE_DIFFERENTIATION	GO_NEGATIVE_REGULATION_OF_ASTROCYTE_DIFFERENTIATION	GO_NEGATIVE_REGULATION_OF_ASTROCYTE_DIFFERENTIATION	14	0.676261	1.53462	0.0439024	0.214432	348	tags=14%, list=2%, signal=14%	NR1D1/LDLR
GO_ENDOPLASMIC_RETICULUM_CALCIUM_ION_HOMEOSTASIS	GO_ENDOPLASMIC_RETICULUM_CALCIUM_ION_HOMEOSTASIS	GO_ENDOPLASMIC_RETICULUM_CALCIUM_ION_HOMEOSTASIS	23	0.676445	1.74631	0.0101266	0.0978487	1743	tags=35%, list=9%, signal=32%	HERPUD1/SELENOK/APP/CAMK2D/RAP1GDS1/CCDC47/PSEN1/TGM2
GO_MONOSACCHARIDE_BINDING	GO_MONOSACCHARIDE_BINDING	GO_MONOSACCHARIDE_BINDING	63	0.678007	2.07054	0.00316456	0.0810766	1533	tags=30%, list=8%, signal=28%	SLC2A3/P4HA1/P4HA2/GPI/HK2/EGLN1/PFKP/PLOD2/ALDOA/HK1/PLOD1/P3H2/UGP2/PFKL/MANBA/PAM/GYS1/LMAN1/CLEC4M
GO_NEGATIVE_REGULATION_OF_RECEPTOR_MEDIATED_ENDOCYTOSIS	GO_NEGATIVE_REGULATION_OF_RECEPTOR_MEDIATED_ENDOCYTOSIS	GO_NEGATIVE_REGULATION_OF_RECEPTOR_MEDIATED_ENDOCYTOSIS	25	0.680811	1.74752	0.00547945	0.0852082	1086	tags=20%, list=6%, signal=19%	WDR54/DLG4/PCSK9/SDCBP/UNC119
GO_ANDROGEN_METABOLIC_PROCESS	GO_ANDROGEN_METABOLIC_PROCESS	GO_ANDROGEN_METABOLIC_PROCESS	28	0.681091	1.8096	0.00520833	0.0843661	1266	tags=14%, list=7%, signal=13%	ADM/TIPARP/SCARB1/SPP1
GO_LABYRINTHINE_LAYER_MORPHOGENESIS	GO_LABYRINTHINE_LAYER_MORPHOGENESIS	GO_LABYRINTHINE_LAYER_MORPHOGENESIS	19	0.682736	1.66525	0.0125628	0.108181	2486	tags=53%, list=13%, signal=46%	ADM/SPINT1/BMP7/WNT7B/SOCS3/ZFP36L1/SPINT2/GRB2/DNAJB6/NCOA1
GO_REGULATION_OF_ASTROCYTE_DIFFERENTIATION	GO_REGULATION_OF_ASTROCYTE_DIFFERENTIATION	GO_REGULATION_OF_ASTROCYTE_DIFFERENTIATION	30	0.683057	1.83119	0.00530504	0.0847876	1768	tags=23%, list=9%, signal=21%	HES1/CLCF1/NR1D1/LDLR/BIN1/LIF/IL6
GO_C_C_CHEMOKINE_BINDING	GO_C_C_CHEMOKINE_BINDING	GO_C_C_CHEMOKINE_BINDING	21	0.683164	1.71935	0.0075188	0.0891975	3126	tags=29%, list=16%, signal=24%	ZFP36/CXCR4/CCR4/ACKR4/CCR9/CCR2
GO_PARTURITION	GO_PARTURITION	GO_PARTURITION	13	0.685847	1.54471	0.047619	0.22606	3806	tags=38%, list=20%, signal=31%	MAFF/ARNTL/NRK/KALRN/PTGFR
GO_TRANSFORMING_GROWTH_FACTOR_BETA_PRODUCTION	GO_TRANSFORMING_GROWTH_FACTOR_BETA_PRODUCTION	GO_TRANSFORMING_GROWTH_FACTOR_BETA_PRODUCTION	38	0.685978	1.92669	0.00273973	0.0810766	2070	tags=24%, list=11%, signal=21%	CD34/PTGS2/ATF2/SMAD3/CDH3/LTBP3/CD24/CD46/ATP6AP2
GO_EPITHELIAL_CELL_CELL_ADHESION	GO_EPITHELIAL_CELL_CELL_ADHESION	GO_EPITHELIAL_CELL_CELL_ADHESION	13	0.686462	1.54609	0.0452381	0.218195	1812	tags=31%, list=9%, signal=28%	ITGB5/JUP/VCL/CTNNA1
GO_PHAGOCYTOSIS_RECOGNITION	GO_PHAGOCYTOSIS_RECOGNITION	GO_PHAGOCYTOSIS_RECOGNITION	14	0.688211	1.56174	0.0390244	0.199409	492	tags=14%, list=3%, signal=14%	JMJD6/SCARB1
GO_EPITHELIAL_CELL_FATE_COMMITMENT	GO_EPITHELIAL_CELL_FATE_COMMITMENT	GO_EPITHELIAL_CELL_FATE_COMMITMENT	15	0.688785	1.5892	0.031477	0.178257	2148	tags=40%, list=11%, signal=36%	NR2F2/ESRP1/ACVR1/RBPJ/RARA/NKX2-2
GO_REGULATION_OF_HEART_RATE_BY_CARDIAC_CONDUCTION	GO_REGULATION_OF_HEART_RATE_BY_CARDIAC_CONDUCTION	GO_REGULATION_OF_HEART_RATE_BY_CARDIAC_CONDUCTION	37	0.688819	1.92411	0.00273973	0.0810766	2708	tags=43%, list=14%, signal=37%	BIN1/JUP/DSP/CAMK2D/KCNH2/DSC2/HCN4/CAV1/PKP2/DSG2/KCNE5/SCN2B/YWHAE/KCNA5/SCN5A/GJA5
GO_B_CELL_APOPTOTIC_PROCESS	GO_B_CELL_APOPTOTIC_PROCESS	GO_B_CELL_APOPTOTIC_PROCESS	23	0.689263	1.7794	0.00759494	0.0892256	3652	tags=57%, list=19%, signal=46%	BCL6/IRS2/BCL2L11/CRKL/PTEN/MIF/FNIP1/LYN/PKN1/BAX/BCL10/FOXP1/IL2
GO_INSULIN_LIKE_GROWTH_FACTOR_BINDING	GO_INSULIN_LIKE_GROWTH_FACTOR_BINDING	GO_INSULIN_LIKE_GROWTH_FACTOR_BINDING	23	0.68963	1.78035	0.00759494	0.0892256	814	tags=30%, list=4%, signal=29%	IGFBP6/IGF1R/IGFBP7/IGFBP3/IGFBP2/ITGB4/ITGA6
GO_DETOXIFICATION_OF_INORGANIC_COMPOUND	GO_DETOXIFICATION_OF_INORGANIC_COMPOUND	GO_DETOXIFICATION_OF_INORGANIC_COMPOUND	16	0.690649	1.63092	0.019656	0.139968	1450	tags=38%, list=8%, signal=35%	SLC30A1/MT1X/MT1F/MT2A/MT1A/MT1E
GO_NEGATIVE_REGULATION_OF_GLIAL_CELL_DIFFERENTIATION	GO_NEGATIVE_REGULATION_OF_GLIAL_CELL_DIFFERENTIATION	GO_NEGATIVE_REGULATION_OF_GLIAL_CELL_DIFFERENTIATION	27	0.693009	1.82943	0.00524934	0.0843661	884	tags=19%, list=5%, signal=18%	HES1/DRD3/NR1D1/LDLR/DUSP10
GO_PLATELET_DERIVED_GROWTH_FACTOR_RECEPTOR_BETA_SIGNALING_PATHWAY	GO_PLATELET_DERIVED_GROWTH_FACTOR_RECEPTOR_BETA_SIGNALING_PATHWAY	GO_PLATELET_DERIVED_GROWTH_FACTOR_RECEPTOR_BETA_SIGNALING_PATHWAY	14	0.695343	1.57792	0.0341463	0.185697	1488	tags=43%, list=8%, signal=40%	PDGFA/PTPN2/PDGFRL/PTPN12/ABL1/PDGFB
GO_HEAT_GENERATION	GO_HEAT_GENERATION	GO_HEAT_GENERATION	17	0.695501	1.66182	0.017199	0.128684	92	tags=12%, list=0%, signal=12%	ARRDC3/PTGS2
GO_MITOTIC_CELL_CYCLE_ARREST	GO_MITOTIC_CELL_CYCLE_ARREST	GO_MITOTIC_CELL_CYCLE_ARREST	15	0.695663	1.60507	0.0290557	0.173685	164	tags=20%, list=1%, signal=20%	DUSP1/GADD45A/CDKN1B
GO_SODIUM_INDEPENDENT_ORGANIC_ANION_TRANSMEMBRANE_TRANSPORTER_ACTIVITY	GO_SODIUM_INDEPENDENT_ORGANIC_ANION_TRANSMEMBRANE_TRANSPORTER_ACTIVITY	GO_SODIUM_INDEPENDENT_ORGANIC_ANION_TRANSMEMBRANE_TRANSPORTER_ACTIVITY	14	0.697323	1.58242	0.0341463	0.185697	309	tags=14%, list=2%, signal=14%	SLCO1B3/SLCO4A1
GO_NITRIC_OXIDE_SYNTHASE_BINDING	GO_NITRIC_OXIDE_SYNTHASE_BINDING	GO_NITRIC_OXIDE_SYNTHASE_BINDING	14	0.697744	1.58337	0.0341463	0.185697	2425	tags=43%, list=13%, signal=37%	ACTB/SNTA1/CAV1/DNM2/DMD/SCN5A
GO_REGULATION_OF_MONOCYTE_CHEMOTAXIS	GO_REGULATION_OF_MONOCYTE_CHEMOTAXIS	GO_REGULATION_OF_MONOCYTE_CHEMOTAXIS	22	0.699213	1.77164	0.00507614	0.0835886	3151	tags=41%, list=16%, signal=34%	DUSP1/SERPINE1/ANO6/LGMN/AIF1/S100A14/LYN/CCR2/CXCL17
GO_SODIUM_INDEPENDENT_ORGANIC_ANION_TRANSPORT	GO_SODIUM_INDEPENDENT_ORGANIC_ANION_TRANSPORT	GO_SODIUM_INDEPENDENT_ORGANIC_ANION_TRANSPORT	15	0.699563	1.61407	0.0242131	0.156709	309	tags=13%, list=2%, signal=13%	SLCO1B3/SLCO4A1
GO_GAP_JUNCTION_CHANNEL_ACTIVITY	GO_GAP_JUNCTION_CHANNEL_ACTIVITY	GO_GAP_JUNCTION_CHANNEL_ACTIVITY	16	0.699567	1.65197	0.019656	0.139968	2708	tags=38%, list=14%, signal=32%	GJB3/GJA3/PANX2/GJC2/PANX1/GJA5
GO_ER_NUCLEUS_SIGNALING_PATHWAY	GO_ER_NUCLEUS_SIGNALING_PATHWAY	GO_ER_NUCLEUS_SIGNALING_PATHWAY	43	0.699928	1.99783	0.0027933	0.0810766	1379	tags=44%, list=7%, signal=41%	HERPUD1/DDIT3/ATF3/INSIG2/INSIG1/HSPA5/CXCL8/PPP1R15A/GSK3B/ATF4/XBP1/EIF2AK3/HSP90B1/PTPN2/NCK1/CCDC47/BCL2L11/NCK2/EIF2A
GO_POSITIVE_REGULATION_OF_TRANSCRIPTION_FROM_RNA_POLYMERASE_II_PROMOTER_IN_RESPONSE_TO_STRESS	GO_POSITIVE_REGULATION_OF_TRANSCRIPTION_FROM_RNA_POLYMERASE_II_PROMOTER_IN_RESPONSE_TO_STRESS	GO_POSITIVE_REGULATION_OF_TRANSCRIPTION_FROM_RNA_POLYMERASE_II_PROMOTER_IN_RESPONSE_TO_STRESS	27	0.69996	1.84778	0.00524934	0.0843661	1005	tags=30%, list=5%, signal=28%	DDIT3/ATF3/HSPA5/VEGFA/ATF4/SESN2/RBPJ/MAPK7
GO_CATECHOLAMINE_BINDING	GO_CATECHOLAMINE_BINDING	GO_CATECHOLAMINE_BINDING	19	0.700558	1.70871	0.0100503	0.0978487	2064	tags=21%, list=11%, signal=19%	DRD3/GPR143/ADRA2B/ADRA2A
GO_EMBRYONIC_PLACENTA_MORPHOGENESIS	GO_EMBRYONIC_PLACENTA_MORPHOGENESIS	GO_EMBRYONIC_PLACENTA_MORPHOGENESIS	23	0.700692	1.80891	0.00506329	0.0835886	2486	tags=48%, list=13%, signal=42%	ADM/CDKN1C/SPINT1/BMP7/WNT7B/SOCS3/ZFP36L1/SPINT2/GRB2/DNAJB6/NCOA1
GO_LEUKOCYTE_AGGREGATION	GO_LEUKOCYTE_AGGREGATION	GO_LEUKOCYTE_AGGREGATION	13	0.701017	1.57888	0.0357143	0.190975	1079	tags=31%, list=6%, signal=29%	RAC2/NR4A3/BMP7/SEMA4D
GO_REGULATION_OF_B_CELL_APOPTOTIC_PROCESS	GO_REGULATION_OF_B_CELL_APOPTOTIC_PROCESS	GO_REGULATION_OF_B_CELL_APOPTOTIC_PROCESS	17	0.701708	1.67665	0.014742	0.1183	3652	tags=59%, list=19%, signal=48%	BCL6/IRS2/PTEN/MIF/FNIP1/LYN/BAX/BCL10/FOXP1/IL2
GO_MAGNESIUM_ION_HOMEOSTASIS	GO_MAGNESIUM_ION_HOMEOSTASIS	GO_MAGNESIUM_ION_HOMEOSTASIS	12	0.701979	1.55222	0.038835	0.199374	3769	tags=50%, list=20%, signal=40%	EGFR/SLC41A1/CNNM2/CNNM4/TFAP2B/KCNA1
GO_CARBONATE_DEHYDRATASE_ACTIVITY	GO_CARBONATE_DEHYDRATASE_ACTIVITY	GO_CARBONATE_DEHYDRATASE_ACTIVITY	15	0.702067	1.61984	0.0242131	0.156709	1444	tags=27%, list=8%, signal=25%	CA9/CA12/CA5B/CA13
GO_ADENOHYPOPHYSIS_DEVELOPMENT	GO_ADENOHYPOPHYSIS_DEVELOPMENT	GO_ADENOHYPOPHYSIS_DEVELOPMENT	12	0.702418	1.55319	0.038835	0.199374	13	tags=8%, list=0%, signal=8%	HES1
GO_NEGATIVE_REGULATION_OF_OLIGODENDROCYTE_DIFFERENTIATION	GO_NEGATIVE_REGULATION_OF_OLIGODENDROCYTE_DIFFERENTIATION	GO_NEGATIVE_REGULATION_OF_OLIGODENDROCYTE_DIFFERENTIATION	13	0.704823	1.58745	0.0309524	0.177044	884	tags=23%, list=5%, signal=22%	HES1/DRD3/DUSP10
GO_NAD_METABOLIC_PROCESS	GO_NAD_METABOLIC_PROCESS	GO_NAD_METABOLIC_PROCESS	46	0.705461	2.04372	0.0027933	0.0810766	643	tags=30%, list=3%, signal=29%	ALDOC/GPI/HK2/LDHA/ENO2/PFKP/ALDOA/HK1/GAPDH/PGK1/NT5E/PGAM1/PFKL/TPI1
GO_CELLULAR_RESPONSE_TO_CADMIUM_ION	GO_CELLULAR_RESPONSE_TO_CADMIUM_ION	GO_CELLULAR_RESPONSE_TO_CADMIUM_ION	34	0.705676	1.9422	0.0027027	0.0810766	2073	tags=41%, list=11%, signal=37%	JUN/EGFR/MT1X/FOS/MT1F/HMOX1/MT2A/MT1A/GSN/MT1E/MAPK1/MAPK9/AKR1C3/MAPK3
GO_POSITIVE_REGULATION_OF_METANEPHROS_DEVELOPMENT	GO_POSITIVE_REGULATION_OF_METANEPHROS_DEVELOPMENT	GO_POSITIVE_REGULATION_OF_METANEPHROS_DEVELOPMENT	13	0.706235	1.59063	0.0309524	0.177044	2715	tags=54%, list=14%, signal=46%	PDGFA/EGR1/BASP1/PDGFB/LIF/GDNF/RET
GO_POSITIVE_REGULATION_OF_IMMUNOGLOBULIN_SECRETION	GO_POSITIVE_REGULATION_OF_IMMUNOGLOBULIN_SECRETION	GO_POSITIVE_REGULATION_OF_IMMUNOGLOBULIN_SECRETION	11	0.706719	1.51568	0.0484262	0.226712	1768	tags=36%, list=9%, signal=33%	GPI/XBP1/HLA-E/IL6
GO_PROTEIN_LOCALIZATION_TO_PHAGOPHORE_ASSEMBLY_SITE	GO_PROTEIN_LOCALIZATION_TO_PHAGOPHORE_ASSEMBLY_SITE	GO_PROTEIN_LOCALIZATION_TO_PHAGOPHORE_ASSEMBLY_SITE	12	0.706836	1.56296	0.0364078	0.192297	1146	tags=17%, list=6%, signal=16%	WDR45B/ATG9A
GO_POSITIVE_REGULATION_OF_EXTRINSIC_APOPTOTIC_SIGNALING_PATHWAY_VIA_DEATH_DOMAIN_RECEPTORS	GO_POSITIVE_REGULATION_OF_EXTRINSIC_APOPTOTIC_SIGNALING_PATHWAY_VIA_DEATH_DOMAIN_RECEPTORS	GO_POSITIVE_REGULATION_OF_EXTRINSIC_APOPTOTIC_SIGNALING_PATHWAY_VIA_DEATH_DOMAIN_RECEPTORS	14	0.708271	1.60726	0.0268293	0.165731	1694	tags=50%, list=9%, signal=46%	ATF3/PMAIP1/FAF1/PEA15/PTEN/STK3/SKIL
GO_REGULATION_OF_VENTRICULAR_CARDIAC_MUSCLE_CELL_ACTION_POTENTIAL	GO_REGULATION_OF_VENTRICULAR_CARDIAC_MUSCLE_CELL_ACTION_POTENTIAL	GO_REGULATION_OF_VENTRICULAR_CARDIAC_MUSCLE_CELL_ACTION_POTENTIAL	17	0.710384	1.69738	0.00982801	0.0970595	1876	tags=41%, list=10%, signal=37%	BIN1/JUP/DSP/DSC2/CAV1/PKP2/DSG2
GO_ADHESION_OF_SYMBIONT_TO_HOST	GO_ADHESION_OF_SYMBIONT_TO_HOST	GO_ADHESION_OF_SYMBIONT_TO_HOST	13	0.710939	1.60122	0.0261905	0.163795	1716	tags=31%, list=9%, signal=28%	NECTIN2/SCARB1/CLEC4M/LTF
GO_POSITIVE_REGULATION_OF_T_CELL_MEDIATED_CYTOTOXICITY	GO_POSITIVE_REGULATION_OF_T_CELL_MEDIATED_CYTOTOXICITY	GO_POSITIVE_REGULATION_OF_T_CELL_MEDIATED_CYTOTOXICITY	22	0.711039	1.8016	0.00507614	0.0835886	1814	tags=32%, list=9%, signal=29%	NECTIN2/MICA/HLA-G/MICB/HLA-H/HLA-E/STX7
GO_CYCLIN_DEPENDENT_PROTEIN_SERINE_THREONINE_KINASE_INHIBITOR_ACTIVITY	GO_CYCLIN_DEPENDENT_PROTEIN_SERINE_THREONINE_KINASE_INHIBITOR_ACTIVITY	GO_CYCLIN_DEPENDENT_PROTEIN_SERINE_THREONINE_KINASE_INHIBITOR_ACTIVITY	11	0.712061	1.52714	0.0484262	0.226712	355	tags=27%, list=2%, signal=27%	CDKN1C/CDKN1B/CDKN2D
GO_PROTEIN_HYDROXYLATION	GO_PROTEIN_HYDROXYLATION	GO_PROTEIN_HYDROXYLATION	21	0.714073	1.79714	0.00501253	0.0835886	945	tags=43%, list=5%, signal=41%	P4HA1/P4HA2/EGLN1/PLOD2/PLOD1/P3H2/JMJD6/ASPH/CRTAP
GO_POSITIVE_REGULATION_OF_HORMONE_BIOSYNTHETIC_PROCESS	GO_POSITIVE_REGULATION_OF_HORMONE_BIOSYNTHETIC_PROCESS	GO_POSITIVE_REGULATION_OF_HORMONE_BIOSYNTHETIC_PROCESS	11	0.714792	1.533	0.0435835	0.213409	562	tags=18%, list=3%, signal=18%	ADM/EGR1
GO_REGULATION_OF_ASPARTIC_TYPE_PEPTIDASE_ACTIVITY	GO_REGULATION_OF_ASPARTIC_TYPE_PEPTIDASE_ACTIVITY	GO_REGULATION_OF_ASPARTIC_TYPE_PEPTIDASE_ACTIVITY	11	0.714797	1.53301	0.0435835	0.213409	2788	tags=55%, list=14%, signal=47%	BIN1/GRN/SORL1/EFNA3/LYN/PICALM
GO_LOCOMOTORY_EXPLORATION_BEHAVIOR	GO_LOCOMOTORY_EXPLORATION_BEHAVIOR	GO_LOCOMOTORY_EXPLORATION_BEHAVIOR	12	0.714831	1.58064	0.0291262	0.173685	933	tags=25%, list=5%, signal=24%	DLG4/GAD1/PRKCE
GO_REGULATION_OF_SYNAPTIC_VESICLE_FUSION_TO_PRESYNAPTIC_ACTIVE_ZONE_MEMBRANE	GO_REGULATION_OF_SYNAPTIC_VESICLE_FUSION_TO_PRESYNAPTIC_ACTIVE_ZONE_MEMBRANE	GO_REGULATION_OF_SYNAPTIC_VESICLE_FUSION_TO_PRESYNAPTIC_ACTIVE_ZONE_MEMBRANE	11	0.715991	1.53557	0.0435835	0.213409	1272	tags=36%, list=7%, signal=34%	SYT1/STXBP1/RAB3A/SYT7
GO_NEGATIVE_REGULATION_OF_GLYCOPROTEIN_METABOLIC_PROCESS	GO_NEGATIVE_REGULATION_OF_GLYCOPROTEIN_METABOLIC_PROCESS	GO_NEGATIVE_REGULATION_OF_GLYCOPROTEIN_METABOLIC_PROCESS	17	0.716999	1.71318	0.00737101	0.0886068	3706	tags=47%, list=19%, signal=38%	HBEGF/ITM2C/ABCA7/BACE2/TMEM59/AATF/ITM2B/ACER2
GO_NADH_METABOLIC_PROCESS	GO_NADH_METABOLIC_PROCESS	GO_NADH_METABOLIC_PROCESS	40	0.722352	2.04816	0.00278552	0.0810766	643	tags=30%, list=3%, signal=29%	ALDOC/GPI/HK2/ENO2/PFKP/ALDOA/HK1/GAPDH/PGK1/PGAM1/PFKL/TPI1
GO_T_CELL_TOLERANCE_INDUCTION	GO_T_CELL_TOLERANCE_INDUCTION	GO_T_CELL_TOLERANCE_INDUCTION	11	0.723024	1.55065	0.0387409	0.199374	815	tags=18%, list=4%, signal=17%	PHLPP1/HLA-G
GO_POSITIVE_REGULATION_OF_CHEMOKINE_BIOSYNTHETIC_PROCESS	GO_POSITIVE_REGULATION_OF_CHEMOKINE_BIOSYNTHETIC_PROCESS	GO_POSITIVE_REGULATION_OF_CHEMOKINE_BIOSYNTHETIC_PROCESS	12	0.723149	1.59903	0.0291262	0.173685	576	tags=25%, list=3%, signal=24%	APP/EGR1/HMOX1
GO_POSITIVE_REGULATION_OF_ASTROCYTE_DIFFERENTIATION	GO_POSITIVE_REGULATION_OF_ASTROCYTE_DIFFERENTIATION	GO_POSITIVE_REGULATION_OF_ASTROCYTE_DIFFERENTIATION	13	0.725494	1.634	0.0166667	0.12786	1622	tags=31%, list=8%, signal=28%	HES1/CLCF1/BIN1/LIF
GO_RESPONSE_TO_HISTAMINE	GO_RESPONSE_TO_HISTAMINE	GO_RESPONSE_TO_HISTAMINE	11	0.726229	1.55753	0.0387409	0.199374	2694	tags=27%, list=14%, signal=23%	DRD3/DIAPH1/GABRB3
GO_ER_OVERLOAD_RESPONSE	GO_ER_OVERLOAD_RESPONSE	GO_ER_OVERLOAD_RESPONSE	11	0.726989	1.55916	0.0363196	0.192246	989	tags=55%, list=5%, signal=52%	DDIT3/HSPA5/GSK3B/EIF2AK3/CCDC47/BCL2L11
GO_PEPTIDYL_LYSINE_DIMETHYLATION	GO_PEPTIDYL_LYSINE_DIMETHYLATION	GO_PEPTIDYL_LYSINE_DIMETHYLATION	15	0.727501	1.67853	0.00968523	0.0970595	1850	tags=27%, list=10%, signal=24%	KDM3A/SMYD2/ASH1L/EEF1AKMT2
GO_FIBRONECTIN_BINDING	GO_FIBRONECTIN_BINDING	GO_FIBRONECTIN_BINDING	25	0.728383	1.86963	0.00547945	0.0852082	882	tags=32%, list=5%, signal=31%	IGFBP6/VEGFA/SDC4/PLEKHA2/FBLN1/IGFBP3/HSD17B12/ITGB1
GO_NUCLEOSIDE_MONOPHOSPHATE_PHOSPHORYLATION	GO_NUCLEOSIDE_MONOPHOSPHATE_PHOSPHORYLATION	GO_NUCLEOSIDE_MONOPHOSPHATE_PHOSPHORYLATION	12	0.728641	1.61118	0.026699	0.16518	1537	tags=33%, list=8%, signal=31%	AK2/AK4/CMPK1/AK3
GO_TROPOMYOSIN_BINDING	GO_TROPOMYOSIN_BINDING	GO_TROPOMYOSIN_BINDING	13	0.730158	1.64451	0.0142857	0.115768	977	tags=31%, list=5%, signal=29%	NEBL/TMOD1/TMOD3/CALD1
GO_NEGATIVE_REGULATION_OF_MULTICELLULAR_ORGANISM_GROWTH	GO_NEGATIVE_REGULATION_OF_MULTICELLULAR_ORGANISM_GROWTH	GO_NEGATIVE_REGULATION_OF_MULTICELLULAR_ORGANISM_GROWTH	11	0.731073	1.56792	0.0363196	0.192246	1120	tags=27%, list=6%, signal=26%	STC2/GDF15/LGMN
GO_LOW_DENSITY_LIPOPROTEIN_PARTICLE_RECEPTOR_ACTIVITY	GO_LOW_DENSITY_LIPOPROTEIN_PARTICLE_RECEPTOR_ACTIVITY	GO_LOW_DENSITY_LIPOPROTEIN_PARTICLE_RECEPTOR_ACTIVITY	12	0.733898	1.6228	0.0218447	0.146516	1280	tags=25%, list=7%, signal=23%	LDLR/SORL1/LRP10
GO_NUCLEOSIDE_MONOPHOSPHATE_KINASE_ACTIVITY	GO_NUCLEOSIDE_MONOPHOSPHATE_KINASE_ACTIVITY	GO_NUCLEOSIDE_MONOPHOSPHATE_KINASE_ACTIVITY	20	0.734092	1.82174	0.00744417	0.0888618	896	tags=30%, list=5%, signal=29%	AK2/AK4/CASK/GUK1/MPP1/CMPK1
GO_GLUCOSE_BINDING	GO_GLUCOSE_BINDING	GO_GLUCOSE_BINDING	11	0.73522	1.57681	0.031477	0.178257	2243	tags=64%, list=12%, signal=56%	SLC2A3/HK2/HK1/UGP2/GYS1/HK3/PYGL
GO_REGULATION_OF_NEUROTROPHIN_TRK_RECEPTOR_SIGNALING_PATHWAY	GO_REGULATION_OF_NEUROTROPHIN_TRK_RECEPTOR_SIGNALING_PATHWAY	GO_REGULATION_OF_NEUROTROPHIN_TRK_RECEPTOR_SIGNALING_PATHWAY	12	0.735829	1.62707	0.0218447	0.146516	1754	tags=33%, list=9%, signal=30%	SPRY1/CYFIP2/PPP2R5B/CYFIP1
GO_OLIGOSACCHARIDE_CATABOLIC_PROCESS	GO_OLIGOSACCHARIDE_CATABOLIC_PROCESS	GO_OLIGOSACCHARIDE_CATABOLIC_PROCESS	11	0.736512	1.57958	0.0290557	0.173685	1484	tags=27%, list=8%, signal=25%	NEU1/MANBA/MAN2B1
GO_AMP_METABOLIC_PROCESS	GO_AMP_METABOLIC_PROCESS	GO_AMP_METABOLIC_PROCESS	12	0.736677	1.62895	0.0218447	0.146516	1713	tags=50%, list=9%, signal=46%	AK2/AK4/NT5E/ADK/AK3/PRPS2
GO_REGULATION_OF_TRANSLATION_IN_RESPONSE_TO_STRESS	GO_REGULATION_OF_TRANSLATION_IN_RESPONSE_TO_STRESS	GO_REGULATION_OF_TRANSLATION_IN_RESPONSE_TO_STRESS	15	0.737057	1.70057	0.00968523	0.0970595	1174	tags=47%, list=6%, signal=44%	PPP1R15A/DNAJC3/ATF4/SESN2/EIF2AK3/NCK1/NCK2
GO_NEGATIVE_REGULATION_OF_MESENCHYMAL_CELL_APOPTOTIC_PROCESS	GO_NEGATIVE_REGULATION_OF_MESENCHYMAL_CELL_APOPTOTIC_PROCESS	GO_NEGATIVE_REGULATION_OF_MESENCHYMAL_CELL_APOPTOTIC_PROCESS	10	0.737114	1.5304	0.0339806	0.185497	874	tags=30%, list=5%, signal=29%	SOX9/HNF1B/BMP7
GO_PROTEIN_NITROSYLATION	GO_PROTEIN_NITROSYLATION	GO_PROTEIN_NITROSYLATION	15	0.737354	1.70126	0.00968523	0.0970595	2257	tags=33%, list=12%, signal=29%	GAPDH/OXR1/SNTA1/ACE/DMD
GO_RETINAL_GANGLION_CELL_AXON_GUIDANCE	GO_RETINAL_GANGLION_CELL_AXON_GUIDANCE	GO_RETINAL_GANGLION_CELL_AXON_GUIDANCE	21	0.739759	1.86179	0.00250627	0.0810766	351	tags=14%, list=2%, signal=14%	PTPRM/VEGFA/ISL2
GO_GLUCOSE_CATABOLIC_PROCESS	GO_GLUCOSE_CATABOLIC_PROCESS	GO_GLUCOSE_CATABOLIC_PROCESS	35	0.741018	2.05282	0.00269542	0.0810766	1643	tags=43%, list=9%, signal=39%	ALDOC/GPI/HK2/ENO2/PFKP/ALDOA/HK1/GAPDH/PGK1/PGAM1/PFKL/TPI1/PKM/BAD/FOXK1
GO_PEPTIDYL_TYROSINE_AUTOPHOSPHORYLATION	GO_PEPTIDYL_TYROSINE_AUTOPHOSPHORYLATION	GO_PEPTIDYL_TYROSINE_AUTOPHOSPHORYLATION	34	0.741868	2.04181	0.0027027	0.0810766	2218	tags=44%, list=12%, signal=39%	VEGFA/EGFR/FRK/IGF1R/DDR1/DYRK1A/YES1/IQGAP1/FER/ABL1/CAV1/FGR/ACE/MAPK3/LYN
GO_L_ASCORBIC_ACID_BINDING	GO_L_ASCORBIC_ACID_BINDING	GO_L_ASCORBIC_ACID_BINDING	17	0.742334	1.77372	0.002457	0.0810766	253	tags=35%, list=1%, signal=35%	P4HA1/P4HA2/EGLN1/PLOD2/PLOD1/P3H2
GO_1_PHOSPHATIDYLINOSITOL_BINDING	GO_1_PHOSPHATIDYLINOSITOL_BINDING	GO_1_PHOSPHATIDYLINOSITOL_BINDING	15	0.743087	1.71449	0.00484262	0.0828798	1508	tags=40%, list=8%, signal=37%	EEA1/SYT1/SCARB1/WDFY1/SNX10/ZFYVE1
GO_NEGATIVE_REGULATION_OF_PROTEIN_OLIGOMERIZATION	GO_NEGATIVE_REGULATION_OF_PROTEIN_OLIGOMERIZATION	GO_NEGATIVE_REGULATION_OF_PROTEIN_OLIGOMERIZATION	12	0.743174	1.64331	0.0169903	0.128355	598	tags=33%, list=3%, signal=32%	RIOK3/TMC8/CLDN7/SORL1
GO_POSITIVE_REGULATION_OF_RENAL_SODIUM_EXCRETION	GO_POSITIVE_REGULATION_OF_RENAL_SODIUM_EXCRETION	GO_POSITIVE_REGULATION_OF_RENAL_SODIUM_EXCRETION	14	0.743701	1.68766	0.0097561	0.0970595	21	tags=7%, list=0%, signal=7%	DRD3
GO_NEGATIVE_REGULATION_OF_TRANSCRIPTION_FROM_RNA_POLYMERASE_II_PROMOTER_IN_RESPONSE_TO_STRESS	GO_NEGATIVE_REGULATION_OF_TRANSCRIPTION_FROM_RNA_POLYMERASE_II_PROMOTER_IN_RESPONSE_TO_STRESS	GO_NEGATIVE_REGULATION_OF_TRANSCRIPTION_FROM_RNA_POLYMERASE_II_PROMOTER_IN_RESPONSE_TO_STRESS	10	0.744049	1.54479	0.0339806	0.185497	1831	tags=60%, list=10%, signal=54%	JUN/DNAJB1/CITED2/NCK1/NCK2/BAG3
GO_PLATELET_DERIVED_GROWTH_FACTOR_RECEPTOR_BINDING	GO_PLATELET_DERIVED_GROWTH_FACTOR_RECEPTOR_BINDING	GO_PLATELET_DERIVED_GROWTH_FACTOR_RECEPTOR_BINDING	14	0.748866	1.69938	0.00731707	0.0886068	2218	tags=57%, list=12%, signal=51%	PDGFA/VEGFA/ITGA5/PDGFD/PDGFB/PTEN/PDGFC/LYN
GO_ACTIVATION_OF_CYSTEINE_TYPE_ENDOPEPTIDASE_ACTIVITY	GO_ACTIVATION_OF_CYSTEINE_TYPE_ENDOPEPTIDASE_ACTIVITY	GO_ACTIVATION_OF_CYSTEINE_TYPE_ENDOPEPTIDASE_ACTIVITY	13	0.749706	1.68854	0.00714286	0.0881926	1435	tags=46%, list=7%, signal=43%	TBC1D10A/ASPH/CYFIP2/LGMN/PERP/BAD
GO_REGULATION_OF_HEAT_GENERATION	GO_REGULATION_OF_HEAT_GENERATION	GO_REGULATION_OF_HEAT_GENERATION	13	0.749904	1.68898	0.00714286	0.0881926	92	tags=15%, list=0%, signal=15%	ARRDC3/PTGS2
GO_CD4_POSITIVE_ALPHA_BETA_T_CELL_PROLIFERATION	GO_CD4_POSITIVE_ALPHA_BETA_T_CELL_PROLIFERATION	GO_CD4_POSITIVE_ALPHA_BETA_T_CELL_PROLIFERATION	10	0.750328	1.55783	0.026699	0.16518	1012	tags=30%, list=5%, signal=28%	TWSG1/ARG2/CD55
GO_LOW_DENSITY_LIPOPROTEIN_PARTICLE_BINDING	GO_LOW_DENSITY_LIPOPROTEIN_PARTICLE_BINDING	GO_LOW_DENSITY_LIPOPROTEIN_PARTICLE_BINDING	15	0.750716	1.73209	0.00242131	0.0810766	781	tags=27%, list=4%, signal=26%	LDLR/SCARB1/SORL1/PCSK9
GO_NEGATIVE_REGULATION_OF_VOLTAGE_GATED_CALCIUM_CHANNEL_ACTIVITY	GO_NEGATIVE_REGULATION_OF_VOLTAGE_GATED_CALCIUM_CHANNEL_ACTIVITY	GO_NEGATIVE_REGULATION_OF_VOLTAGE_GATED_CALCIUM_CHANNEL_ACTIVITY	19	0.750812	1.83129	0.00502513	0.0835886	1278	tags=21%, list=7%, signal=20%	DRD3/GEM/CACNB3/RRAD
GO_NEGATIVE_REGULATION_OF_ENDOPLASMIC_RETICULUM_UNFOLDED_PROTEIN_RESPONSE	GO_NEGATIVE_REGULATION_OF_ENDOPLASMIC_RETICULUM_UNFOLDED_PROTEIN_RESPONSE	GO_NEGATIVE_REGULATION_OF_ENDOPLASMIC_RETICULUM_UNFOLDED_PROTEIN_RESPONSE	11	0.753083	1.61512	0.0193705	0.138967	1174	tags=45%, list=6%, signal=43%	HSPA5/PPP1R15A/DNAJB9/NCK1/NCK2
GO_LENS_FIBER_CELL_DIFFERENTIATION	GO_LENS_FIBER_CELL_DIFFERENTIATION	GO_LENS_FIBER_CELL_DIFFERENTIATION	28	0.754749	2.0053	0.00260417	0.0810766	1694	tags=36%, list=9%, signal=33%	CDKN1C/CDKN1B/EPHA2/ABI2/BFSP1/VIM/TMOD1/SMAD3/WNT7B/SKIL
GO_NEGATIVE_REGULATION_OF_MEMBRANE_POTENTIAL	GO_NEGATIVE_REGULATION_OF_MEMBRANE_POTENTIAL	GO_NEGATIVE_REGULATION_OF_MEMBRANE_POTENTIAL	15	0.756122	1.74456	0.00242131	0.0810766	2625	tags=40%, list=14%, signal=35%	BNIP3/BNIP3L/PMAIP1/RNF122/BAX/MAPT
GO_NEUROTRANSMITTER_GATED_ION_CHANNEL_CLUSTERING	GO_NEUROTRANSMITTER_GATED_ION_CHANNEL_CLUSTERING	GO_NEUROTRANSMITTER_GATED_ION_CHANNEL_CLUSTERING	12	0.756533	1.67285	0.00970874	0.0970595	1839	tags=25%, list=10%, signal=23%	DLG4/GPHN/SHANK3
GO_PEPTIDYL_PROLINE_HYDROXYLATION	GO_PEPTIDYL_PROLINE_HYDROXYLATION	GO_PEPTIDYL_PROLINE_HYDROXYLATION	11	0.762126	1.63451	0.0169492	0.128355	1634	tags=55%, list=8%, signal=50%	P4HA1/P4HA2/EGLN1/P3H2/CRTAP/P4HB
GO_NEGATIVE_REGULATION_OF_GLYCOPROTEIN_BIOSYNTHETIC_PROCESS	GO_NEGATIVE_REGULATION_OF_GLYCOPROTEIN_BIOSYNTHETIC_PROCESS	GO_NEGATIVE_REGULATION_OF_GLYCOPROTEIN_BIOSYNTHETIC_PROCESS	14	0.763675	1.73299	0.00243902	0.0810766	3706	tags=57%, list=19%, signal=46%	HBEGF/ITM2C/ABCA7/BACE2/TMEM59/AATF/ITM2B/ACER2
GO_NEGATIVE_REGULATION_OF_RECEPTOR_INTERNALIZATION	GO_NEGATIVE_REGULATION_OF_RECEPTOR_INTERNALIZATION	GO_NEGATIVE_REGULATION_OF_RECEPTOR_INTERNALIZATION	14	0.7642	1.73418	0.00243902	0.0810766	855	tags=21%, list=4%, signal=20%	WDR54/DLG4/SDCBP
GO_CLATHRIN_SCULPTED_VESICLE	GO_CLATHRIN_SCULPTED_VESICLE	GO_CLATHRIN_SCULPTED_VESICLE	12	0.764351	1.69014	0.00728155	0.0886068	528	tags=25%, list=3%, signal=24%	GAD1/SYT1/RAB3A
GO_PLATELET_DERIVED_GROWTH_FACTOR_BINDING	GO_PLATELET_DERIVED_GROWTH_FACTOR_BINDING	GO_PLATELET_DERIVED_GROWTH_FACTOR_BINDING	11	0.766409	1.6437	0.0169492	0.128355	1612	tags=27%, list=8%, signal=25%	PDGFA/PDGFB/COL4A1
GO_AMP_BINDING	GO_AMP_BINDING	GO_AMP_BINDING	13	0.767577	1.72879	0.00238095	0.0810766	2286	tags=46%, list=12%, signal=41%	PFKP/ACSS2/PFKL/PRPS2/PYGL/CYB5R3
GO_ANGIOGENESIS_INVOLVED_IN_WOUND_HEALING	GO_ANGIOGENESIS_INVOLVED_IN_WOUND_HEALING	GO_ANGIOGENESIS_INVOLVED_IN_WOUND_HEALING	22	0.769004	1.94847	0.00253807	0.0810766	2414	tags=45%, list=13%, signal=40%	CD34/SERPINE1/ETS1/XBP1/CXCR4/PRCP/ADIPOR2/HPSE/TNFAIP3/DAG1
GO_POSITIVE_REGULATION_OF_TRANSFORMING_GROWTH_FACTOR_BETA_PRODUCTION	GO_POSITIVE_REGULATION_OF_TRANSFORMING_GROWTH_FACTOR_BETA_PRODUCTION	GO_POSITIVE_REGULATION_OF_TRANSFORMING_GROWTH_FACTOR_BETA_PRODUCTION	20	0.769385	1.90933	0.00248139	0.0810766	2070	tags=30%, list=11%, signal=27%	CD34/PTGS2/ATF2/SMAD3/CD46/ATP6AP2
GO_ANTIGEN_PROCESSING_AND_PRESENTATION_VIA_MHC_CLASS_IB	GO_ANTIGEN_PROCESSING_AND_PRESENTATION_VIA_MHC_CLASS_IB	GO_ANTIGEN_PROCESSING_AND_PRESENTATION_VIA_MHC_CLASS_IB	15	0.769526	1.77549	0.00242131	0.0810766	1827	tags=40%, list=9%, signal=36%	MICA/HLA-G/MICB/HLA-H/HLA-E/AP3D1
GO_DOPAMINE_BINDING	GO_DOPAMINE_BINDING	GO_DOPAMINE_BINDING	12	0.769538	1.70161	0.00485437	0.0828798	1474	tags=17%, list=8%, signal=15%	DRD3/GPR143
GO_REGULATION_OF_NEURON_PROJECTION_REGENERATION	GO_REGULATION_OF_NEURON_PROJECTION_REGENERATION	GO_REGULATION_OF_NEURON_PROJECTION_REGENERATION	31	0.770745	2.07015	0.00269542	0.0810766	2014	tags=39%, list=10%, signal=35%	LRIG2/KLF4/MAP2K1/GRN/NDEL1/INPP5F/SPP1/STK24/KLK8/PTEN/PTPRF/KREMEN1
GO_BUNDLE_OF_HIS_CELL_TO_PURKINJE_MYOCYTE_COMMUNICATION	GO_BUNDLE_OF_HIS_CELL_TO_PURKINJE_MYOCYTE_COMMUNICATION	GO_BUNDLE_OF_HIS_CELL_TO_PURKINJE_MYOCYTE_COMMUNICATION	13	0.772827	1.74061	0.00238095	0.0810766	2708	tags=62%, list=14%, signal=53%	JUP/DSP/DSC2/PKP2/DSG2/KCNA5/SCN5A/GJA5
GO_METANEPHRIC_TUBULE_MORPHOGENESIS	GO_METANEPHRIC_TUBULE_MORPHOGENESIS	GO_METANEPHRIC_TUBULE_MORPHOGENESIS	11	0.774119	1.66024	0.0145278	0.116744	222	tags=18%, list=1%, signal=18%	HES1/SOX9
GO_SMOOTH_MUSCLE_CELL_CHEMOTAXIS	GO_SMOOTH_MUSCLE_CELL_CHEMOTAXIS	GO_SMOOTH_MUSCLE_CELL_CHEMOTAXIS	10	0.774158	1.60731	0.00970874	0.0970595	2460	tags=50%, list=13%, signal=44%	PDGFD/PARVA/MDK/AIF1/CORO1B
GO_GERMINAL_CENTER_FORMATION	GO_GERMINAL_CENTER_FORMATION	GO_GERMINAL_CENTER_FORMATION	14	0.775425	1.75965	0.00243902	0.0810766	2400	tags=43%, list=12%, signal=38%	BCL6/BCL3/TNFSF13B/NFKB2/TNFAIP3/PKN1
GO_CARDIOBLAST_PROLIFERATION	GO_CARDIOBLAST_PROLIFERATION	GO_CARDIOBLAST_PROLIFERATION	10	0.776523	1.61222	0.00970874	0.0970595	93	tags=20%, list=0%, signal=20%	HES1/PIM1
GO_LIPOPROTEIN_PARTICLE_RECEPTOR_ACTIVITY	GO_LIPOPROTEIN_PARTICLE_RECEPTOR_ACTIVITY	GO_LIPOPROTEIN_PARTICLE_RECEPTOR_ACTIVITY	13	0.78019	1.75719	0.00238095	0.0810766	1280	tags=31%, list=7%, signal=29%	LDLR/SCARB1/SORL1/LRP10
GO_DISACCHARIDE_METABOLIC_PROCESS	GO_DISACCHARIDE_METABOLIC_PROCESS	GO_DISACCHARIDE_METABOLIC_PROCESS	11	0.781719	1.67654	0.00968523	0.0970595	917	tags=18%, list=5%, signal=17%	SLC2A1/BRAF
GO_PEPTIDYL_PROLINE_DIOXYGENASE_ACTIVITY	GO_PEPTIDYL_PROLINE_DIOXYGENASE_ACTIVITY	GO_PEPTIDYL_PROLINE_DIOXYGENASE_ACTIVITY	10	0.782032	1.62365	0.00970874	0.0970595	253	tags=40%, list=1%, signal=39%	P4HA1/P4HA2/EGLN1/P3H2
GO_NETRIN_ACTIVATED_SIGNALING_PATHWAY	GO_NETRIN_ACTIVATED_SIGNALING_PATHWAY	GO_NETRIN_ACTIVATED_SIGNALING_PATHWAY	12	0.78251	1.73029	0.00242718	0.0810766	2229	tags=42%, list=12%, signal=37%	SIAH2/SIAH1/TUBB3/NTN1/UNC5A
GO_NEGATIVE_REGULATION_OF_VASCULAR_PERMEABILITY	GO_NEGATIVE_REGULATION_OF_VASCULAR_PERMEABILITY	GO_NEGATIVE_REGULATION_OF_VASCULAR_PERMEABILITY	13	0.782982	1.76348	0.00238095	0.0810766	190	tags=15%, list=1%, signal=15%	ADM/AKAP12
GO_POSITIVE_REGULATION_OF_MITOCHONDRIAL_CALCIUM_ION_CONCENTRATION	GO_POSITIVE_REGULATION_OF_MITOCHONDRIAL_CALCIUM_ION_CONCENTRATION	GO_POSITIVE_REGULATION_OF_MITOCHONDRIAL_CALCIUM_ION_CONCENTRATION	11	0.783003	1.67929	0.00968523	0.0970595	2030	tags=55%, list=11%, signal=49%	BNIP3/RAP1GDS1/MICU1/TGM2/MCU/SLC25A23
GO_DESMOSOME_ORGANIZATION	GO_DESMOSOME_ORGANIZATION	GO_DESMOSOME_ORGANIZATION	10	0.783943	1.62762	0.00970874	0.0970595	1876	tags=60%, list=10%, signal=54%	JUP/DSP/PERP/PRKCA/PKP2/DSG2
GO_ENDOPLASMIC_RETICULUM_CHAPERONE_COMPLEX	GO_ENDOPLASMIC_RETICULUM_CHAPERONE_COMPLEX	GO_ENDOPLASMIC_RETICULUM_CHAPERONE_COMPLEX	10	0.78727	1.63453	0.00970874	0.0970595	2424	tags=60%, list=13%, signal=52%	HSPA5/HSP90B1/PDIA6/P4HB/SDF2L1/HYOU1
GO_POSITIVE_REGULATION_OF_MONOCYTE_DIFFERENTIATION	GO_POSITIVE_REGULATION_OF_MONOCYTE_DIFFERENTIATION	GO_POSITIVE_REGULATION_OF_MONOCYTE_DIFFERENTIATION	10	0.78975	1.63968	0.00970874	0.0970595	2543	tags=40%, list=13%, signal=35%	JUN/CTNNBIP1/ZFP36L1/ACIN1
GO_REGULATION_OF_TRANSCRIPTION_FROM_RNA_POLYMERASE_II_PROMOTER_IN_RESPONSE_TO_OXIDATIVE_STRESS	GO_REGULATION_OF_TRANSCRIPTION_FROM_RNA_POLYMERASE_II_PROMOTER_IN_RESPONSE_TO_OXIDATIVE_STRESS	GO_REGULATION_OF_TRANSCRIPTION_FROM_RNA_POLYMERASE_II_PROMOTER_IN_RESPONSE_TO_OXIDATIVE_STRESS	11	0.791419	1.69734	0.00726392	0.0886068	841	tags=45%, list=4%, signal=43%	EPAS1/ATF4/SESN2/HMOX1/SIN3A
GO_GLYCOLYTIC_PROCESS_THROUGH_FRUCTOSE_6_PHOSPHATE	GO_GLYCOLYTIC_PROCESS_THROUGH_FRUCTOSE_6_PHOSPHATE	GO_GLYCOLYTIC_PROCESS_THROUGH_FRUCTOSE_6_PHOSPHATE	28	0.791788	2.10371	0.00260417	0.0810766	643	tags=43%, list=3%, signal=41%	ALDOC/GPI/HK2/ENO2/PFKP/ALDOA/HK1/GAPDH/PGK1/PGAM1/PFKL/TPI1
GO_REGULATION_OF_TRANSLATIONAL_INITIATION_IN_RESPONSE_TO_STRESS	GO_REGULATION_OF_TRANSLATIONAL_INITIATION_IN_RESPONSE_TO_STRESS	GO_REGULATION_OF_TRANSLATIONAL_INITIATION_IN_RESPONSE_TO_STRESS	11	0.795282	1.70562	0.00484262	0.0828798	1174	tags=55%, list=6%, signal=51%	PPP1R15A/DNAJC3/ATF4/EIF2AK3/NCK1/NCK2
GO_RESPONSE_TO_MANGANESE_ION	GO_RESPONSE_TO_MANGANESE_ION	GO_RESPONSE_TO_MANGANESE_ION	17	0.796194	1.90241	0.002457	0.0810766	895	tags=35%, list=5%, signal=34%	HSPA5/PTGS2/ATF4/APP/EIF2AK3/ADAM9
GO_POST_EMBRYONIC_ANIMAL_ORGAN_DEVELOPMENT	GO_POST_EMBRYONIC_ANIMAL_ORGAN_DEVELOPMENT	GO_POST_EMBRYONIC_ANIMAL_ORGAN_DEVELOPMENT	15	0.797089	1.83908	0.00242131	0.0810766	2754	tags=53%, list=14%, signal=46%	LDHA/VEGFA/KLF4/BCL2L11/MYO1E/ERCC1/BAX/HMGN1
GO_FRUCTOSE_METABOLIC_PROCESS	GO_FRUCTOSE_METABOLIC_PROCESS	GO_FRUCTOSE_METABOLIC_PROCESS	15	0.797457	1.83993	0.00242131	0.0810766	188	tags=27%, list=1%, signal=26%	ALDOC/PFKFB4/ALDOA/PFKFB3
GO_PERK_MEDIATED_UNFOLDED_PROTEIN_RESPONSE	GO_PERK_MEDIATED_UNFOLDED_PROTEIN_RESPONSE	GO_PERK_MEDIATED_UNFOLDED_PROTEIN_RESPONSE	20	0.800098	1.98555	0.00248139	0.0810766	1174	tags=55%, list=6%, signal=52%	HERPUD1/DDIT3/ATF3/HSPA5/CXCL8/PPP1R15A/ATF4/EIF2AK3/PTPN2/NCK1/NCK2
GO_NEGATIVE_REGULATION_OF_NEURON_PROJECTION_REGENERATION	GO_NEGATIVE_REGULATION_OF_NEURON_PROJECTION_REGENERATION	GO_NEGATIVE_REGULATION_OF_NEURON_PROJECTION_REGENERATION	14	0.803113	1.82248	0.00243902	0.0810766	2014	tags=43%, list=10%, signal=38%	LRIG2/INPP5F/SPP1/KLK8/PTEN/KREMEN1
GO_G_PROTEIN_BETA_GAMMA_SUBUNIT_COMPLEX	GO_G_PROTEIN_BETA_GAMMA_SUBUNIT_COMPLEX	GO_G_PROTEIN_BETA_GAMMA_SUBUNIT_COMPLEX	11	0.80369	1.72366	0.00484262	0.0828798	2247	tags=36%, list=12%, signal=32%	GNG8/GNG4/GNG5/GNG11
GO_LENS_FIBER_CELL_DEVELOPMENT	GO_LENS_FIBER_CELL_DEVELOPMENT	GO_LENS_FIBER_CELL_DEVELOPMENT	13	0.804424	1.81177	0.00238095	0.0810766	1689	tags=46%, list=9%, signal=42%	EPHA2/ABI2/BFSP1/VIM/TMOD1/WNT7B
GO_REGULATION_OF_VASCULOGENESIS	GO_REGULATION_OF_VASCULOGENESIS	GO_REGULATION_OF_VASCULOGENESIS	13	0.806837	1.81721	0.00238095	0.0810766	73	tags=15%, list=0%, signal=15%	ADM/CD34
GO_CELLULAR_RESPONSE_TO_MANGANESE_ION	GO_CELLULAR_RESPONSE_TO_MANGANESE_ION	GO_CELLULAR_RESPONSE_TO_MANGANESE_ION	11	0.807268	1.73133	0.00242131	0.0810766	513	tags=36%, list=3%, signal=35%	HSPA5/ATF4/APP/EIF2AK3
GO_HEMIDESMOSOME_ASSEMBLY	GO_HEMIDESMOSOME_ASSEMBLY	GO_HEMIDESMOSOME_ASSEMBLY	11	0.807863	1.73261	0.00242131	0.0810766	2635	tags=64%, list=14%, signal=55%	LAMB3/LAMC2/ITGB4/ITGA6/LAMA3/CD151/KRT14
GO_MITOCHONDRIA_ASSOCIATED_ENDOPLASMIC_RETICULUM_MEMBRANE	GO_MITOCHONDRIA_ASSOCIATED_ENDOPLASMIC_RETICULUM_MEMBRANE	GO_MITOCHONDRIA_ASSOCIATED_ENDOPLASMIC_RETICULUM_MEMBRANE	12	0.818857	1.81066	0.00242718	0.0810766	1573	tags=58%, list=8%, signal=54%	CANX/ATG5/PDZD8/ACSL4/RAB38/ZFYVE1/ATG14
GO_BLEB_ASSEMBLY	GO_BLEB_ASSEMBLY	GO_BLEB_ASSEMBLY	10	0.823221	1.70917	0.00242718	0.0810766	998	tags=50%, list=5%, signal=47%	ANO6/EMP1/ANLN/LPAR3/EMP3
GO_POSITIVE_REGULATION_OF_ENDOPLASMIC_RETICULUM_STRESS_INDUCED_INTRINSIC_APOPTOTIC_SIGNALING_PATHWAY	GO_POSITIVE_REGULATION_OF_ENDOPLASMIC_RETICULUM_STRESS_INDUCED_INTRINSIC_APOPTOTIC_SIGNALING_PATHWAY	GO_POSITIVE_REGULATION_OF_ENDOPLASMIC_RETICULUM_STRESS_INDUCED_INTRINSIC_APOPTOTIC_SIGNALING_PATHWAY	11	0.834354	1.78942	0.00242131	0.0810766	1174	tags=64%, list=6%, signal=60%	DDIT3/PMAIP1/PTPN2/NCK1/BCL2L11/SERINC3/NCK2
GO_VASCULAR_WOUND_HEALING	GO_VASCULAR_WOUND_HEALING	GO_VASCULAR_WOUND_HEALING	13	0.835711	1.88224	0.00238095	0.0810766	1961	tags=54%, list=10%, signal=48%	CD34/SERPINE1/XBP1/CXCR4/ADIPOR2/HPSE/TNFAIP3
GO_DOPAMINE_NEUROTRANSMITTER_RECEPTOR_ACTIVITY	GO_DOPAMINE_NEUROTRANSMITTER_RECEPTOR_ACTIVITY	GO_DOPAMINE_NEUROTRANSMITTER_RECEPTOR_ACTIVITY	10	0.83585	1.73539	0.00242718	0.0810766	21	tags=10%, list=0%, signal=10%	DRD3
GO_FRUCTOSE_1_6_BISPHOSPHATE_METABOLIC_PROCESS	GO_FRUCTOSE_1_6_BISPHOSPHATE_METABOLIC_PROCESS	GO_FRUCTOSE_1_6_BISPHOSPHATE_METABOLIC_PROCESS	10	0.842994	1.75022	0.00242718	0.0810766	620	tags=40%, list=3%, signal=39%	ALDOC/PFKP/ALDOA/PFKL
GO_ANTIGEN_PROCESSING_AND_PRESENTATION_OF_PEPTIDE_ANTIGEN_VIA_MHC_CLASS_IB	GO_ANTIGEN_PROCESSING_AND_PRESENTATION_OF_PEPTIDE_ANTIGEN_VIA_MHC_CLASS_IB	GO_ANTIGEN_PROCESSING_AND_PRESENTATION_OF_PEPTIDE_ANTIGEN_VIA_MHC_CLASS_IB	10	0.844535	1.75342	0.00242718	0.0810766	1254	tags=50%, list=7%, signal=47%	MICA/HLA-G/MICB/HLA-H/HLA-E
GO_MAP_KINASE_PHOSPHATASE_ACTIVITY	GO_MAP_KINASE_PHOSPHATASE_ACTIVITY	GO_MAP_KINASE_PHOSPHATASE_ACTIVITY	14	0.857286	1.94542	0.00243902	0.0810766	1868	tags=64%, list=10%, signal=58%	DUSP16/DUSP5/DUSP1/DUSP4/DUSP10/DUSP6/DUSP8/DUSP9/DUSP3
GO_INSULIN_LIKE_GROWTH_FACTOR_I_BINDING	GO_INSULIN_LIKE_GROWTH_FACTOR_I_BINDING	GO_INSULIN_LIKE_GROWTH_FACTOR_I_BINDING	13	0.859557	1.93595	0.00238095	0.0810766	814	tags=46%, list=4%, signal=44%	IGFBP6/IGF1R/IGFBP3/IGFBP2/ITGB4/ITGA6
GO_FRUCTOSE_6_PHOSPHATE_METABOLIC_PROCESS	GO_FRUCTOSE_6_PHOSPHATE_METABOLIC_PROCESS	GO_FRUCTOSE_6_PHOSPHATE_METABOLIC_PROCESS	12	0.876109	1.93726	0.00242718	0.0810766	792	tags=50%, list=4%, signal=48%	HK2/PFKP/HK1/GFPT1/PFKL/NFE2L1
GO_POSITIVE_REGULATION_OF_TRANSCRIPTION_FROM_RNA_POLYMERASE_II_PROMOTER_IN_RESPONSE_TO_ENDOPLASMIC_RETICULUM_STRESS	GO_POSITIVE_REGULATION_OF_TRANSCRIPTION_FROM_RNA_POLYMERASE_II_PROMOTER_IN_RESPONSE_TO_ENDOPLASMIC_RETICULUM_STRESS	GO_POSITIVE_REGULATION_OF_TRANSCRIPTION_FROM_RNA_POLYMERASE_II_PROMOTER_IN_RESPONSE_TO_ENDOPLASMIC_RETICULUM_STRESS	10	0.895129	1.85847	0.00242718	0.0810766	333	tags=40%, list=2%, signal=39%	DDIT3/ATF3/HSPA5/ATF4
Gene Ontologies list sorted for increasing enrichment score values (abs es ≥ 0.60, P-value <0.05) in the siNEG 0.5% O2 vs. siNEG 20% O2 experimental condition.

## Sheet: GO_siTRAP1 20%O2 vs siNEG 20%O2
Table SIII. Continued.
row.names	ID	Description	setSize	enrichmentScore	NES	P-value	Q-value	rank	leading_edge	core_enrichment
GO_SAGA_COMPLEX	GO_SAGA_COMPLEX	GO_SAGA_COMPLEX	13	-0.78423	-1.96465	0.00421941	0.17931	1498	tags=54%, list=8%, signal=50%	TAF6L/SGF29/TADA3/TAF6/USP22/SUPT20H/TAF12
GO_ATF6_MEDIATED_UNFOLDED_PROTEIN_RESPONSE	GO_ATF6_MEDIATED_UNFOLDED_PROTEIN_RESPONSE	GO_ATF6_MEDIATED_UNFOLDED_PROTEIN_RESPONSE	10	-0.779602	-1.81693	0.0104603	0.240987	426	tags=30%, list=2%, signal=29%	ATF6B/MBTPS1/DDIT3
GO_XENOBIOTIC_CATABOLIC_PROCESS	GO_XENOBIOTIC_CATABOLIC_PROCESS	GO_XENOBIOTIC_CATABOLIC_PROCESS	10	-0.748777	-1.74509	0.0167364	0.305581	2189	tags=60%, list=11%, signal=53%	UGT1A1/GSTM4/CRYZ/GSTO1/PON3/GSTM1
GO_POSITIVE_REGULATION_OF_TRANSCRIPTION_FROM_RNA_POLYMERASE_II_PROMOTER_IN_RESPONSE_TO_ENDOPLASMIC_RETICULUM_STRESS	GO_POSITIVE_REGULATION_OF_TRANSCRIPTION_FROM_RNA_POLYMERASE_II_PROMOTER_IN_RESPONSE_TO_ENDOPLASMIC_RETICULUM_STRESS	GO_POSITIVE_REGULATION_OF_TRANSCRIPTION_FROM_RNA_POLYMERASE_II_PROMOTER_IN_RESPONSE_TO_ENDOPLASMIC_RETICULUM_STRESS	10	-0.745854	-1.73828	0.0167364	0.305581	426	tags=30%, list=2%, signal=29%	ATF6B/ATF4/DDIT3
GO_HAPTOGLOBIN_HEMOGLOBIN_COMPLEX	GO_HAPTOGLOBIN_HEMOGLOBIN_COMPLEX	GO_HAPTOGLOBIN_HEMOGLOBIN_COMPLEX	10	-0.731382	-1.70455	0.0271967	0.350518	670	tags=50%, list=3%, signal=48%	HBG2/HP/HBE1/HBA2/HBZ
GO_MKS_COMPLEX	GO_MKS_COMPLEX	GO_MKS_COMPLEX	10	-0.726548	-1.69328	0.0271967	0.350518	3382	tags=60%, list=18%, signal=49%	TCTN1/TMEM231/CC2D2A/MKS1/TMEM67/B9D1
GO_RELAXATION_OF_CARDIAC_MUSCLE	GO_RELAXATION_OF_CARDIAC_MUSCLE	GO_RELAXATION_OF_CARDIAC_MUSCLE	15	-0.724571	-1.88625	0.00414079	0.177166	1697	tags=80%, list=9%, signal=73%	ATP2A2/CHGA/KCNJ2/SLC8A1/CAMK2D/RGS2/PDE5A/PDE4B/ATP1B1/PDE4D/ATP1A1/P2RX4
GO_PROGRAMMED_CELL_DEATH_IN_RESPONSE_TO_REACTIVE_OXYGEN_SPECIES	GO_PROGRAMMED_CELL_DEATH_IN_RESPONSE_TO_REACTIVE_OXYGEN_SPECIES	GO_PROGRAMMED_CELL_DEATH_IN_RESPONSE_TO_REACTIVE_OXYGEN_SPECIES	10	-0.716137	-1.66902	0.0292887	0.365105	2	tags=30%, list=0%, signal=30%	HGF/PARK7/TRAP1
GO_CHROMOCENTER	GO_CHROMOCENTER	GO_CHROMOCENTER	13	-0.699424	-1.75219	0.0126582	0.268059	2865	tags=54%, list=15%, signal=46%	ESCO2/MBD6/CDCA8/PIWIL2/AURKB/TINF2/SCMH1
GO_PYROPTOSIS	GO_PYROPTOSIS	GO_PYROPTOSIS	10	-0.69869	-1.62836	0.0313808	0.370233	1652	tags=50%, list=9%, signal=46%	AIM2/GSDMD/APIP/GSDME/GSDMC
GO_GTPASE_INHIBITOR_ACTIVITY	GO_GTPASE_INHIBITOR_ACTIVITY	GO_GTPASE_INHIBITOR_ACTIVITY	13	-0.697016	-1.74616	0.0147679	0.289354	1075	tags=38%, list=6%, signal=36%	TNK2/GPS2/PDE6D/ARL2/IQGAP2
GO_CELLULAR_RESPONSE_TO_ARSENIC_CONTAINING_SUBSTANCE	GO_CELLULAR_RESPONSE_TO_ARSENIC_CONTAINING_SUBSTANCE	GO_CELLULAR_RESPONSE_TO_ARSENIC_CONTAINING_SUBSTANCE	17	-0.686831	-1.85015	0.00410678	0.176914	1348	tags=41%, list=7%, signal=38%	GSTO1/GSTO2/MKNK2/DAXX/HSF1/ATF4/HNRNPA1
GO_INTRACILIARY_RETROGRADE_TRANSPORT	GO_INTRACILIARY_RETROGRADE_TRANSPORT	GO_INTRACILIARY_RETROGRADE_TRANSPORT	10	-0.686798	-1.60064	0.0376569	0.389543	2901	tags=80%, list=15%, signal=68%	DYNC2H1/IFT122/WDR19/IFT140/IFT43/TTC21A/TCTEX1D2/ICK
GO_TYROSINE_METABOLIC_PROCESS	GO_TYROSINE_METABOLIC_PROCESS	GO_TYROSINE_METABOLIC_PROCESS	10	-0.682553	-1.59075	0.0460251	0.411184	521	tags=40%, list=3%, signal=39%	HPD/TAT/PAH/GSTZ1
GO_REGULATION_OF_CILIUM_BEAT_FREQUENCY	GO_REGULATION_OF_CILIUM_BEAT_FREQUENCY	GO_REGULATION_OF_CILIUM_BEAT_FREQUENCY	10	-0.678811	-1.58203	0.0481172	0.419388	4755	tags=70%, list=25%, signal=53%	BBS4/BBS2/MKKS/CCSAP/GAS2L2/DNAAF1/ARMC4
GO_DNA_DEAMINATION	GO_DNA_DEAMINATION	GO_DNA_DEAMINATION	12	-0.67513	-1.64033	0.0273109	0.351271	4071	tags=50%, list=21%, signal=39%	APOBEC3H/EXOSC3/CDADC1/APOBEC3G/APOBEC3C/APOBEC3F
GO_GLUTATHIONE_DERIVATIVE_METABOLIC_PROCESS	GO_GLUTATHIONE_DERIVATIVE_METABOLIC_PROCESS	GO_GLUTATHIONE_DERIVATIVE_METABOLIC_PROCESS	20	-0.672916	-1.90305	0.00592885	0.197674	3309	tags=55%, list=17%, signal=46%	ESD/GSTA3/GSTK1/GSTM4/GSTO1/MGST3/GSTO2/AKR1A1/GSTA4/GSTM1/GSTZ1
GO_POSITIVE_REGULATION_OF_CHOLESTEROL_EFFLUX	GO_POSITIVE_REGULATION_OF_CHOLESTEROL_EFFLUX	GO_POSITIVE_REGULATION_OF_CHOLESTEROL_EFFLUX	15	-0.672551	-1.75083	0.010352	0.239369	2172	tags=33%, list=11%, signal=30%	ABCG1/GPS2/PLTP/NR1H3/NFKBIA
GO_NEGATIVE_REGULATION_OF_SINGLE_STRANDED_VIRAL_RNA_REPLICATION_VIA_DOUBLE_STRANDED_DNA_INTERMEDIATE	GO_NEGATIVE_REGULATION_OF_SINGLE_STRANDED_VIRAL_RNA_REPLICATION_VIA_DOUBLE_STRANDED_DNA_INTERMEDIATE	GO_NEGATIVE_REGULATION_OF_SINGLE_STRANDED_VIRAL_RNA_REPLICATION_VIA_DOUBLE_STRANDED_DNA_INTERMEDIATE	13	-0.666507	-1.66973	0.021097	0.329637	1631	tags=46%, list=8%, signal=42%	APOBEC3H/INPP5K/SETDB1/APOBEC3G/APOBEC3C/APOBEC3F
GO_ANNEALING_ACTIVITY	GO_ANNEALING_ACTIVITY	GO_ANNEALING_ACTIVITY	11	-0.665399	-1.58049	0.0382979	0.390482	1822	tags=45%, list=9%, signal=41%	EIF4B/BLM/RECQL4/RECQL/FXR1
GO_PROTEASOME_CORE_COMPLEX_BETA_SUBUNIT_COMPLEX	GO_PROTEASOME_CORE_COMPLEX_BETA_SUBUNIT_COMPLEX	GO_PROTEASOME_CORE_COMPLEX_BETA_SUBUNIT_COMPLEX	11	-0.664906	-1.57932	0.0382979	0.390482	4306	tags=64%, list=22%, signal=49%	PSMB5/PSMB3/PSMB2/PSMB4/PSMB11/PSMB8/PSMB9
GO_MITOTIC_SPINDLE_MIDZONE	GO_MITOTIC_SPINDLE_MIDZONE	GO_MITOTIC_SPINDLE_MIDZONE	12	-0.664303	-1.61402	0.0294118	0.365105	2985	tags=50%, list=16%, signal=42%	KIF18A/KIF18B/AURKB/CTTN/EML1/RCC2
GO_HEMOGLOBIN_COMPLEX	GO_HEMOGLOBIN_COMPLEX	GO_HEMOGLOBIN_COMPLEX	11	-0.662819	-1.57436	0.0382979	0.390482	670	tags=27%, list=3%, signal=26%	HBE1/HBA2/HBZ
GO_CYTIDINE_TO_URIDINE_EDITING	GO_CYTIDINE_TO_URIDINE_EDITING	GO_CYTIDINE_TO_URIDINE_EDITING	11	-0.659418	-1.56628	0.0425532	0.404286	1076	tags=55%, list=6%, signal=52%	APOBEC2/A1CF/APOBEC3H/APOBEC3G/APOBEC3C/APOBEC3F
GO_BARBED_END_ACTIN_FILAMENT_CAPPING	GO_BARBED_END_ACTIN_FILAMENT_CAPPING	GO_BARBED_END_ACTIN_FILAMENT_CAPPING	18	-0.652394	-1.7778	0.00616016	0.197674	1391	tags=28%, list=7%, signal=26%	WASHC2C/CARMIL1/GSN/CARMIL2/ADD1
GO_MRNA_TRANSCRIPTION_BY_RNA_POLYMERASE_II	GO_MRNA_TRANSCRIPTION_BY_RNA_POLYMERASE_II	GO_MRNA_TRANSCRIPTION_BY_RNA_POLYMERASE_II	17	-0.649115	-1.74856	0.00821355	0.221712	396	tags=29%, list=2%, signal=29%	ATF4/SUPT6H/STAT3/SREBF1/DDIT3
GO_PEPTIDE_DISULFIDE_OXIDOREDUCTASE_ACTIVITY	GO_PEPTIDE_DISULFIDE_OXIDOREDUCTASE_ACTIVITY	GO_PEPTIDE_DISULFIDE_OXIDOREDUCTASE_ACTIVITY	12	-0.644856	-1.56677	0.0357143	0.38568	1348	tags=50%, list=7%, signal=47%	PDIA4/PDIA6/GSTO1/GSTO2/PDIA5/GLRX
GO_ACTIVATION_OF_MAPKKK_ACTIVITY	GO_ACTIVATION_OF_MAPKKK_ACTIVITY	GO_ACTIVATION_OF_MAPKKK_ACTIVITY	12	-0.643179	-1.5627	0.0357143	0.38568	657	tags=42%, list=3%, signal=40%	DAB2IP/TNF/TAB1/TRAF7/MAP4K1
GO_NEGATIVE_REGULATION_OF_GLYCOLYTIC_PROCESS	GO_NEGATIVE_REGULATION_OF_GLYCOLYTIC_PROCESS	GO_NEGATIVE_REGULATION_OF_GLYCOLYTIC_PROCESS	13	-0.640293	-1.60406	0.0232068	0.338455	702	tags=31%, list=4%, signal=30%	PPARA/FBP1/STAT3/PFKFB1
GO_OXYGEN_CARRIER_ACTIVITY	GO_OXYGEN_CARRIER_ACTIVITY	GO_OXYGEN_CARRIER_ACTIVITY	13	-0.639079	-1.60101	0.0253165	0.344759	3082	tags=46%, list=16%, signal=39%	CYGB/IPCEF1/MB/HBE1/HBA2/HBZ
GO_INTRACILIARY_TRANSPORT_PARTICLE_B	GO_INTRACILIARY_TRANSPORT_PARTICLE_B	GO_INTRACILIARY_TRANSPORT_PARTICLE_B	18	-0.635057	-1.73055	0.00821355	0.221712	1243	tags=33%, list=6%, signal=31%	IFT88/IFT46/IFT81/TRAF3IP1/IFT172/IFT27
GO_RIBOSOMAL_LARGE_SUBUNIT_ASSEMBLY	GO_RIBOSOMAL_LARGE_SUBUNIT_ASSEMBLY	GO_RIBOSOMAL_LARGE_SUBUNIT_ASSEMBLY	27	-0.632416	-1.93636	0.00394477	0.176914	1591	tags=37%, list=8%, signal=34%	RPL24/RPL6/MRPL11/RPL23A/RPL12/RPL5/RPL10/RPLP0/RPL3/NOP53
GO_POSITIVE_REGULATION_OF_ACROSOME_REACTION	GO_POSITIVE_REGULATION_OF_ACROSOME_REACTION	GO_POSITIVE_REGULATION_OF_ACROSOME_REACTION	12	-0.62783	-1.52541	0.0420168	0.402228	1373	tags=25%, list=7%, signal=23%	CACNA1H/ZP3/POMZP3
GO_ADENOHYPOPHYSIS_DEVELOPMENT	GO_ADENOHYPOPHYSIS_DEVELOPMENT	GO_ADENOHYPOPHYSIS_DEVELOPMENT	12	-0.626247	-1.52156	0.0441176	0.408446	5234	tags=58%, list=27%, signal=42%	HES1/GHRHR/SOX2/WNT4/PITX2/DRD2/GSX1
GO_TELOMERE_LOCALIZATION	GO_TELOMERE_LOCALIZATION	GO_TELOMERE_LOCALIZATION	13	-0.625355	-1.56663	0.0295359	0.365105	5177	tags=69%, list=27%, signal=51%	TERB1/TERF1/TERB2/ATM/MEI1/NUP98/CCDC155/SPO11/RAD21L1
GO_BRANCHING_INVOLVED_IN_LABYRINTHINE_LAYER_MORPHOGENESIS	GO_BRANCHING_INVOLVED_IN_LABYRINTHINE_LAYER_MORPHOGENESIS	GO_BRANCHING_INVOLVED_IN_LABYRINTHINE_LAYER_MORPHOGENESIS	12	-0.623762	-1.51552	0.0483193	0.419388	2951	tags=42%, list=15%, signal=35%	SPINT2/IL10/SOCS3/SPINT1/GRHL2
GO_LOCOMOTOR_RHYTHM	GO_LOCOMOTOR_RHYTHM	GO_LOCOMOTOR_RHYTHM	15	-0.620646	-1.6157	0.0310559	0.369378	875	tags=27%, list=5%, signal=25%	NMS/MTA1/EGR1/ID2
GO_REGULATION_OF_IMMUNOGLOBULIN_SECRETION	GO_REGULATION_OF_IMMUNOGLOBULIN_SECRETION	GO_REGULATION_OF_IMMUNOGLOBULIN_SECRETION	18	-0.619317	-1.68766	0.0102669	0.238279	4426	tags=50%, list=23%, signal=39%	TRAF2/TRAF6/CD40LG/TNF/GPI/HLA-E/CD40/TMBIM6/TNFSF4
GO_NEGATIVE_REGULATION_OF_INFLAMMATORY_RESPONSE_TO_ANTIGENIC_STIMULUS	GO_NEGATIVE_REGULATION_OF_INFLAMMATORY_RESPONSE_TO_ANTIGENIC_STIMULUS	GO_NEGATIVE_REGULATION_OF_INFLAMMATORY_RESPONSE_TO_ANTIGENIC_STIMULUS	13	-0.617704	-1.54747	0.0400844	0.396399	3955	tags=54%, list=21%, signal=43%	SELENOS/NLRP6/GPX1/IL10/GPR17/PSMB4/PSMA1
GO_OXYGEN_TRANSPORT	GO_OXYGEN_TRANSPORT	GO_OXYGEN_TRANSPORT	14	-0.615495	-1.57079	0.0354167	0.38568	3082	tags=43%, list=16%, signal=36%	CYGB/IPCEF1/MB/HBE1/HBA2/HBZ
GO_MRNA_TRANSCRIPTION	GO_MRNA_TRANSCRIPTION	GO_MRNA_TRANSCRIPTION	21	-0.61412	-1.77383	0.00976562	0.238095	903	tags=29%, list=5%, signal=27%	HSF1/ATF4/SUPT6H/STAT3/SREBF1/DDIT3
GO_GLUTATHIONE_TRANSFERASE_ACTIVITY	GO_GLUTATHIONE_TRANSFERASE_ACTIVITY	GO_GLUTATHIONE_TRANSFERASE_ACTIVITY	23	-0.614081	-1.82881	0.00793651	0.221712	3305	tags=39%, list=17%, signal=32%	GSTA3/GSTK1/GSTM4/GSTO1/MGST3/GSTO2/GSTA4/GSTM1/GSTZ1
GO_SAGA_TYPE_COMPLEX	GO_SAGA_TYPE_COMPLEX	GO_SAGA_TYPE_COMPLEX	25	-0.613039	-1.85111	0.00795229	0.221712	1498	tags=36%, list=8%, signal=33%	TAF6L/TADA2A/SGF29/TADA3/TAF6/USP22/TAF7/SUPT20H/TAF12
GO_REGULATION_OF_CILIUM_MOVEMENT	GO_REGULATION_OF_CILIUM_MOVEMENT	GO_REGULATION_OF_CILIUM_MOVEMENT	14	-0.611628	-1.56092	0.0375	0.389533	4755	tags=64%, list=25%, signal=48%	BBS4/TTLL6/BBS2/MKKS/CCSAP/GAS2L2/DNAAF1/ARMC4/CFAP298
GO_AMINE_CATABOLIC_PROCESS	GO_AMINE_CATABOLIC_PROCESS	GO_AMINE_CATABOLIC_PROCESS	22	-0.611232	-1.78372	0.00806452	0.221712	3823	tags=45%, list=20%, signal=36%	SMOX/HAAO/SARDH/SAT2/ALDH7A1/AFMID/ATP2B4/TDO2/SAT1/PAOX
GO_SPERM_PRINCIPAL_PIECE	GO_SPERM_PRINCIPAL_PIECE	GO_SPERM_PRINCIPAL_PIECE	22	-0.610506	-1.78161	0.0100806	0.238095	1445	tags=32%, list=8%, signal=29%	SLC9B2/ATP2B4/SPA17/ENKUR/IFT81/IFT172/IFT27
GO_GLYCOSIDE_METABOLIC_PROCESS	GO_GLYCOSIDE_METABOLIC_PROCESS	GO_GLYCOSIDE_METABOLIC_PROCESS	19	-0.610107	-1.68207	0.0144928	0.285742	2513	tags=42%, list=13%, signal=37%	AKR1C3/AKR7A2/SLC34A1/GBA/GLA/AKR1A1/NAGA/AKR1C2
GO_CYCLIC_NUCLEOTIDE_CATABOLIC_PROCESS	GO_CYCLIC_NUCLEOTIDE_CATABOLIC_PROCESS	GO_CYCLIC_NUCLEOTIDE_CATABOLIC_PROCESS	14	-0.609979	-1.55671	0.0395833	0.395694	1432	tags=36%, list=7%, signal=33%	PDE5A/PDE9A/PDE7B/PDE4B/PDE4D
GO_REGULATION_OF_SULFUR_METABOLIC_PROCESS	GO_REGULATION_OF_SULFUR_METABOLIC_PROCESS	GO_REGULATION_OF_SULFUR_METABOLIC_PROCESS	15	-0.609902	-1.58773	0.0372671	0.389533	2826	tags=40%, list=15%, signal=34%	PDP2/PDK3/COMT/SNCA/PDK4/GSTZ1
GO_POSITIVE_REGULATION_OF_INTERLEUKIN_13_PRODUCTION	GO_POSITIVE_REGULATION_OF_INTERLEUKIN_13_PRODUCTION	GO_POSITIVE_REGULATION_OF_INTERLEUKIN_13_PRODUCTION	15	-0.60984	-1.58757	0.0372671	0.389533	2642	tags=47%, list=14%, signal=40%	HLA-E/IL17RA/NLRP3/PAEP/PRKCZ/RARA/TNFSF4
GO_ESTABLISHMENT_OR_MAINTENANCE_OF_TRANSMEMBRANE_ELECTROCHEMICAL_GRADIENT	GO_ESTABLISHMENT_OR_MAINTENANCE_OF_TRANSMEMBRANE_ELECTROCHEMICAL_GRADIENT	GO_ESTABLISHMENT_OR_MAINTENANCE_OF_TRANSMEMBRANE_ELECTROCHEMICAL_GRADIENT	14	-0.609496	-1.55548	0.0395833	0.395694	2096	tags=36%, list=11%, signal=32%	ATP12A/BAX/ATP1B1/ATP1A1/ATP4B
GO_MESENCHYMAL_TO_EPITHELIAL_TRANSITION_INVOLVED_IN_METANEPHROS_MORPHOGENESIS	GO_MESENCHYMAL_TO_EPITHELIAL_TRANSITION_INVOLVED_IN_METANEPHROS_MORPHOGENESIS	GO_MESENCHYMAL_TO_EPITHELIAL_TRANSITION_INVOLVED_IN_METANEPHROS_MORPHOGENESIS	13	-0.607336	-1.52149	0.0464135	0.41335	4383	tags=69%, list=23%, signal=53%	LIF/WNT9B/GREM1/PAX2/SMO/SIX2/PAX8/STAT1/BMP4
GO_REGULATION_OF_POSTSYNAPTIC_DENSITY_ORGANIZATION	GO_REGULATION_OF_POSTSYNAPTIC_DENSITY_ORGANIZATION	GO_REGULATION_OF_POSTSYNAPTIC_DENSITY_ORGANIZATION	15	-0.606854	-1.5798	0.0372671	0.389533	1680	tags=40%, list=9%, signal=37%	NRXN1/CRIPT/GRID2/PTPRS/ZMYND8/CBLN1
GO_HISTONE_H3_K9_DEMETHYLATION	GO_HISTONE_H3_K9_DEMETHYLATION	GO_HISTONE_H3_K9_DEMETHYLATION	14	-0.606548	-1.54795	0.0395833	0.395694	1860	tags=36%, list=10%, signal=32%	HR/HSF4/PHF2/KDM4B/KDM7A
GO_INFLAMMASOME_COMPLEX	GO_INFLAMMASOME_COMPLEX	GO_INFLAMMASOME_COMPLEX	13	-0.603886	-1.51285	0.0485232	0.419388	5001	tags=62%, list=26%, signal=46%	CASP5/AIM2/NLRP6/DHX33/NLRP3/GSDMD/PYCARD/CASP4
GO_POSITIVE_REGULATION_OF_CYTOPLASMIC_TRANSPORT	GO_POSITIVE_REGULATION_OF_CYTOPLASMIC_TRANSPORT	GO_POSITIVE_REGULATION_OF_CYTOPLASMIC_TRANSPORT	13	-0.603384	-1.51159	0.0485232	0.419388	3535	tags=46%, list=18%, signal=38%	MAP2/SORL1/TRIM46/MTMR2/PTPN23/DAB2
GO_REGULATION_OF_GLOMERULUS_DEVELOPMENT	GO_REGULATION_OF_GLOMERULUS_DEVELOPMENT	GO_REGULATION_OF_GLOMERULUS_DEVELOPMENT	13	-0.60265	-1.50975	0.0485232	0.419388	1341	tags=31%, list=7%, signal=29%	PAX2/PDGFB/BMP4/EGR1
GO_POSITIVE_REGULATION_OF_T_CELL_CYTOKINE_PRODUCTION	GO_POSITIVE_REGULATION_OF_T_CELL_CYTOKINE_PRODUCTION	GO_POSITIVE_REGULATION_OF_T_CELL_CYTOKINE_PRODUCTION	17	-0.601639	-1.62067	0.0184805	0.307313	2403	tags=35%, list=12%, signal=31%	RSAD2/NLRP3/PRKCZ/IL18R1/IL1R1/TNFSF4
GO_POSITIVE_REGULATION_OF_BLOOD_VESSEL_ENDOTHELIAL_CELL_PROLIFERATION_INVOLVED_IN_SPROUTING_ANGIOGENESIS	GO_POSITIVE_REGULATION_OF_BLOOD_VESSEL_ENDOTHELIAL_CELL_PROLIFERATION_INVOLVED_IN_SPROUTING_ANGIOGENESIS	GO_POSITIVE_REGULATION_OF_BLOOD_VESSEL_ENDOTHELIAL_CELL_PROLIFERATION_INVOLVED_IN_SPROUTING_ANGIOGENESIS	19	-0.601055	-1.65712	0.0144928	0.285742	3243	tags=37%, list=17%, signal=31%	FGFBP1/MIR503/MIR23A/MIR10B/PPP1R16B/AGTR1/GATA2
GO_MRNA_CLEAVAGE_INVOLVED_IN_MRNA_PROCESSING	GO_MRNA_CLEAVAGE_INVOLVED_IN_MRNA_PROCESSING	GO_MRNA_CLEAVAGE_INVOLVED_IN_MRNA_PROCESSING	13	-0.600863	-1.50528	0.0485232	0.419388	5119	tags=54%, list=27%, signal=40%	CSTF2T/CPSF4/NUDT21/CSTF2/CPSF1/ERN1/NCBP2
GO_CHONDROITIN_SULFATE_PROTEOGLYCAN_BIOSYNTHETIC_PROCESS	GO_CHONDROITIN_SULFATE_PROTEOGLYCAN_BIOSYNTHETIC_PROCESS	GO_CHONDROITIN_SULFATE_PROTEOGLYCAN_BIOSYNTHETIC_PROCESS	26	0.600538	1.83777	0.0059761	0.197674	2421	tags=35%, list=13%, signal=30%	VCAN/XYLT1/XYLT2/BGN/CSPG5/CHST11/CSPG4/CSGALNACT2/DSE
GO_MODULATION_BY_VIRUS_OF_HOST_MORPHOLOGY_OR_PHYSIOLOGY	GO_MODULATION_BY_VIRUS_OF_HOST_MORPHOLOGY_OR_PHYSIOLOGY	GO_MODULATION_BY_VIRUS_OF_HOST_MORPHOLOGY_OR_PHYSIOLOGY	28	0.600795	1.86465	0.00806452	0.221712	707	tags=21%, list=4%, signal=21%	SMAD3/CLEC4M/HIPK2/BAD/KPNA4/BCL2L1
GO_ESTABLISHMENT_OR_MAINTENANCE_OF_ACTIN_CYTOSKELETON_POLARITY	GO_ESTABLISHMENT_OR_MAINTENANCE_OF_ACTIN_CYTOSKELETON_POLARITY	GO_ESTABLISHMENT_OR_MAINTENANCE_OF_ACTIN_CYTOSKELETON_POLARITY	14	0.601464	1.55664	0.045977	0.411184	1367	tags=43%, list=7%, signal=40%	RND3/RHOD/RHOB/RHOBTB1/RHOC/RICTOR
GO_NEGATIVE_REGULATION_OF_HOMOTYPIC_CELL_CELL_ADHESION	GO_NEGATIVE_REGULATION_OF_HOMOTYPIC_CELL_CELL_ADHESION	GO_NEGATIVE_REGULATION_OF_HOMOTYPIC_CELL_CELL_ADHESION	14	0.602657	1.55973	0.045977	0.411184	4695	tags=50%, list=24%, signal=38%	CEACAM1/SERPINE2/SH2B3/UBASH3B/PRKG1/CD9/ZNF703
GO_REGULATION_OF_RESPIRATORY_GASEOUS_EXCHANGE	GO_REGULATION_OF_RESPIRATORY_GASEOUS_EXCHANGE	GO_REGULATION_OF_RESPIRATORY_GASEOUS_EXCHANGE	21	0.602689	1.72056	0.0163265	0.302906	1663	tags=29%, list=9%, signal=26%	PBX3/ADORA1/PHOX2A/NTSR1/NLGN2/GRIN1
GO_REGULATION_OF_TRANSCRIPTION_INVOLVED_IN_G1_S_TRANSITION_OF_MITOTIC_CELL_CYCLE	GO_REGULATION_OF_TRANSCRIPTION_INVOLVED_IN_G1_S_TRANSITION_OF_MITOTIC_CELL_CYCLE	GO_REGULATION_OF_TRANSCRIPTION_INVOLVED_IN_G1_S_TRANSITION_OF_MITOTIC_CELL_CYCLE	26	0.603355	1.84639	0.0059761	0.197674	1523	tags=35%, list=8%, signal=32%	CCNE1/KLF11/E2F7/TFDP1/E2F4/CDC6/FBXO5/PCNA/HINFP
GO_DETECTION_OF_TEMPERATURE_STIMULUS_INVOLVED_IN_SENSORY_PERCEPTION	GO_DETECTION_OF_TEMPERATURE_STIMULUS_INVOLVED_IN_SENSORY_PERCEPTION	GO_DETECTION_OF_TEMPERATURE_STIMULUS_INVOLVED_IN_SENSORY_PERCEPTION	15	0.603878	1.57993	0.0346821	0.38336	1491	tags=33%, list=8%, signal=31%	ANO1/LXN/ADORA1/TRPV1/NTSR1
GO_CHONDROITIN_SULFATE_PROTEOGLYCAN_METABOLIC_PROCESS	GO_CHONDROITIN_SULFATE_PROTEOGLYCAN_METABOLIC_PROCESS	GO_CHONDROITIN_SULFATE_PROTEOGLYCAN_METABOLIC_PROCESS	39	0.605135	1.98721	0.00196078	0.125903	2421	tags=33%, list=13%, signal=29%	VCAN/XYLT1/HYAL1/IDS/XYLT2/BGN/CSPG5/EGFLAM/CHST11/CSPG4/IMPAD1/CSGALNACT2/DSE
GO_NEGATIVE_REGULATION_OF_KERATINOCYTE_PROLIFERATION	GO_NEGATIVE_REGULATION_OF_KERATINOCYTE_PROLIFERATION	GO_NEGATIVE_REGULATION_OF_KERATINOCYTE_PROLIFERATION	15	0.606279	1.58622	0.0308285	0.367922	860	tags=27%, list=4%, signal=25%	EFNB2/CD109/MED1/SNAI2
GO_MACROPHAGE_CYTOKINE_PRODUCTION	GO_MACROPHAGE_CYTOKINE_PRODUCTION	GO_MACROPHAGE_CYTOKINE_PRODUCTION	14	0.606384	1.56937	0.0421456	0.402456	94	tags=14%, list=0%, signal=14%	GAS6/TGFB3
GO_CONNEXIN_COMPLEX	GO_CONNEXIN_COMPLEX	GO_CONNEXIN_COMPLEX	16	0.607448	1.6138	0.023301	0.338455	517	tags=19%, list=3%, signal=18%	GJB3/GJB1/GJB4
GO_ZINC_ION_HOMEOSTASIS	GO_ZINC_ION_HOMEOSTASIS	GO_ZINC_ION_HOMEOSTASIS	36	0.608338	1.95744	0.00196464	0.125903	2143	tags=33%, list=11%, signal=30%	SLC30A3/SLC39A8/ATP7B/AP3D1/MT2A/MT1A/SLC30A5/SLC30A7/TMC8/SLC39A4/SLC39A6/MT1E
GO_INOSITOL_PHOSPHATE_PHOSPHATASE_ACTIVITY	GO_INOSITOL_PHOSPHATE_PHOSPHATASE_ACTIVITY	GO_INOSITOL_PHOSPHATE_PHOSPHATASE_ACTIVITY	14	0.608906	1.5759	0.0402299	0.396705	1971	tags=43%, list=10%, signal=38%	INPP1/PTEN/OCRL/IMPAD1/INPP5D/INPP5A
GO_NEGATIVE_REGULATION_OF_BIOMINERALIZATION	GO_NEGATIVE_REGULATION_OF_BIOMINERALIZATION	GO_NEGATIVE_REGULATION_OF_BIOMINERALIZATION	27	0.614357	1.88314	0.00606061	0.197674	2274	tags=33%, list=12%, signal=29%	GAS6/HEY1/HIF1A/SOX9/RFLNB/NOS3/ROCK1/ECM1/FGF23
GO_PSEUDOPODIUM	GO_PSEUDOPODIUM	GO_PSEUDOPODIUM	17	0.614806	1.65406	0.0174757	0.305581	2159	tags=35%, list=11%, signal=31%	ACTN4/MAPK1/CAPN2/ARRB1/F2RL1/ACTN2
GO_POSITIVE_REGULATION_OF_EXTRINSIC_APOPTOTIC_SIGNALING_PATHWAY_VIA_DEATH_DOMAIN_RECEPTORS	GO_POSITIVE_REGULATION_OF_EXTRINSIC_APOPTOTIC_SIGNALING_PATHWAY_VIA_DEATH_DOMAIN_RECEPTORS	GO_POSITIVE_REGULATION_OF_EXTRINSIC_APOPTOTIC_SIGNALING_PATHWAY_VIA_DEATH_DOMAIN_RECEPTORS	14	0.616137	1.59461	0.0344828	0.382502	2788	tags=50%, list=14%, signal=43%	PMAIP1/PTEN/PEA15/STK3/SKIL/ATF3/FAF1
GO_CALYX_OF_HELD	GO_CALYX_OF_HELD	GO_CALYX_OF_HELD	24	0.617634	1.84105	0.00604839	0.197674	3658	tags=46%, list=19%, signal=37%	ACTB/ACTG1/NCS1/ADORA1/KCNA1/ITSN1/PRKCB/UNC13B/KCNK2/UNC13A/KCNA2
GO_MACROMOLECULE_TRANSMEMBRANE_TRANSPORTER_ACTIVITY	GO_MACROMOLECULE_TRANSMEMBRANE_TRANSPORTER_ACTIVITY	GO_MACROMOLECULE_TRANSMEMBRANE_TRANSPORTER_ACTIVITY	20	0.617701	1.73727	0.0120968	0.258076	4112	tags=50%, list=21%, signal=39%	TOMM40/SEC61A1/TIMM17A/SEC61G/TOMM70/TIMM17B/BLOC1S3/TIMM22/AZGP1/TIMM23
GO_EXTRACELLULAR_MATRIX_ASSEMBLY	GO_EXTRACELLULAR_MATRIX_ASSEMBLY	GO_EXTRACELLULAR_MATRIX_ASSEMBLY	37	0.618055	1.99547	0.00198413	0.125903	708	tags=19%, list=4%, signal=18%	HAS3/SMAD3/GAS6/QSOX1/LAMB3/SOX9/PLOD3
GO_GAP_JUNCTION_CHANNEL_ACTIVITY	GO_GAP_JUNCTION_CHANNEL_ACTIVITY	GO_GAP_JUNCTION_CHANNEL_ACTIVITY	16	0.620308	1.64796	0.0174757	0.305581	517	tags=19%, list=3%, signal=18%	GJB3/GJB1/GJB4
GO_PEPTIDYL_THREONINE_DEPHOSPHORYLATION	GO_PEPTIDYL_THREONINE_DEPHOSPHORYLATION	GO_PEPTIDYL_THREONINE_DEPHOSPHORYLATION	15	0.620953	1.62461	0.0250482	0.344759	2175	tags=40%, list=11%, signal=36%	PPM1A/PPM1E/DUSP4/PPM1B/PPP2CA/PPM1D
GO_EYELID_DEVELOPMENT_IN_CAMERA_TYPE_EYE	GO_EYELID_DEVELOPMENT_IN_CAMERA_TYPE_EYE	GO_EYELID_DEVELOPMENT_IN_CAMERA_TYPE_EYE	12	0.624012	1.5373	0.0418251	0.402228	1186	tags=25%, list=6%, signal=23%	JUN/EGFR/HDAC2
GO_CELL_MIGRATION_IN_HINDBRAIN	GO_CELL_MIGRATION_IN_HINDBRAIN	GO_CELL_MIGRATION_IN_HINDBRAIN	14	0.626043	1.62025	0.0249042	0.344759	1687	tags=21%, list=9%, signal=20%	ITGB1/PLXNA2/POU4F1
GO_WIDE_PORE_CHANNEL_ACTIVITY	GO_WIDE_PORE_CHANNEL_ACTIVITY	GO_WIDE_PORE_CHANNEL_ACTIVITY	22	0.627102	1.83346	0.00592885	0.197674	517	tags=18%, list=3%, signal=18%	GJB3/TOMM40/GJB1/GJB4
GO_ADENYLATE_CYCLASE_BINDING	GO_ADENYLATE_CYCLASE_BINDING	GO_ADENYLATE_CYCLASE_BINDING	12	0.627441	1.54575	0.0380228	0.390482	4536	tags=67%, list=24%, signal=51%	CALM1/CALM3/AKAP12/CAP1/ADCY2/AKAP5/ADRB2/ADCY5
GO_POSITIVE_REGULATION_OF_DNA_DAMAGE_RESPONSE_SIGNAL_TRANSDUCTION_BY_P53_CLASS_MEDIATOR	GO_POSITIVE_REGULATION_OF_DNA_DAMAGE_RESPONSE_SIGNAL_TRANSDUCTION_BY_P53_CLASS_MEDIATOR	GO_POSITIVE_REGULATION_OF_DNA_DAMAGE_RESPONSE_SIGNAL_TRANSDUCTION_BY_P53_CLASS_MEDIATOR	14	0.628697	1.62712	0.0229885	0.337029	2873	tags=43%, list=15%, signal=36%	PMAIP1/SPRED3/RPL26/EEF1E1/PLA2R1/SPRED2
GO_RENAL_SYSTEM_PROCESS_INVOLVED_IN_REGULATION_OF_BLOOD_VOLUME	GO_RENAL_SYSTEM_PROCESS_INVOLVED_IN_REGULATION_OF_BLOOD_VOLUME	GO_RENAL_SYSTEM_PROCESS_INVOLVED_IN_REGULATION_OF_BLOOD_VOLUME	14	0.629352	1.62882	0.0229885	0.337029	1867	tags=29%, list=10%, signal=26%	GAS6/EMP2/ADORA1/F2RL1
GO_RETINAL_METABOLIC_PROCESS	GO_RETINAL_METABOLIC_PROCESS	GO_RETINAL_METABOLIC_PROCESS	13	0.632311	1.60011	0.0284091	0.358073	3178	tags=46%, list=17%, signal=39%	ALDH1A3/RDH11/CYP1B1/SDR16C5/RDH10/RDH13
GO_NEGATIVE_REGULATION_OF_PLATELET_AGGREGATION	GO_NEGATIVE_REGULATION_OF_PLATELET_AGGREGATION	GO_NEGATIVE_REGULATION_OF_PLATELET_AGGREGATION	12	0.632742	1.55881	0.0342205	0.382502	3078	tags=42%, list=16%, signal=35%	CEACAM1/SERPINE2/SH2B3/UBASH3B/PRKG1
GO_MUCUS_SECRETION	GO_MUCUS_SECRETION	GO_MUCUS_SECRETION	11	0.633457	1.53729	0.0432331	0.405236	3008	tags=45%, list=16%, signal=38%	ADORA1/SYTL2/P2RY2/AGR2/PRKCE
GO_EPITHELIAL_TO_MESENCHYMAL_TRANSITION_INVOLVED_IN_ENDOCARDIAL_CUSHION_FORMATION	GO_EPITHELIAL_TO_MESENCHYMAL_TRANSITION_INVOLVED_IN_ENDOCARDIAL_CUSHION_FORMATION	GO_EPITHELIAL_TO_MESENCHYMAL_TRANSITION_INVOLVED_IN_ENDOCARDIAL_CUSHION_FORMATION	16	0.634078	1.68454	0.0135922	0.279863	4328	tags=44%, list=22%, signal=34%	SNAI2/SMAD4/TGFBR2/MSX2/TGFBR1/NOTCH1/ACVR1
GO_POSITIVE_REGULATION_OF_SYNAPTIC_VESICLE_EXOCYTOSIS	GO_POSITIVE_REGULATION_OF_SYNAPTIC_VESICLE_EXOCYTOSIS	GO_POSITIVE_REGULATION_OF_SYNAPTIC_VESICLE_EXOCYTOSIS	11	0.634321	1.53939	0.0432331	0.405236	3832	tags=45%, list=20%, signal=36%	SYT7/SYT1/SYT9/UNC13B/CACNB2
GO_REGULATION_OF_RESPIRATORY_SYSTEM_PROCESS	GO_REGULATION_OF_RESPIRATORY_SYSTEM_PROCESS	GO_REGULATION_OF_RESPIRATORY_SYSTEM_PROCESS	14	0.634475	1.64207	0.0210728	0.329637	1601	tags=21%, list=8%, signal=20%	PBX3/ADORA1/NLGN2
GO_REGULATION_OF_ENDOCYTIC_RECYCLING	GO_REGULATION_OF_ENDOCYTIC_RECYCLING	GO_REGULATION_OF_ENDOCYTIC_RECYCLING	10	0.63569	1.48908	0.0477099	0.418508	2159	tags=40%, list=11%, signal=36%	NDRG4/ARHGAP1/BVES/ACTN2
GO_LEYDIG_CELL_DIFFERENTIATION	GO_LEYDIG_CELL_DIFFERENTIATION	GO_LEYDIG_CELL_DIFFERENTIATION	11	0.641237	1.55617	0.037594	0.389533	2967	tags=45%, list=15%, signal=38%	CCND1/DHH/SGPL1/TMF1/NR0B1
GO_REGULATION_OF_PERK_MEDIATED_UNFOLDED_PROTEIN_RESPONSE	GO_REGULATION_OF_PERK_MEDIATED_UNFOLDED_PROTEIN_RESPONSE	GO_REGULATION_OF_PERK_MEDIATED_UNFOLDED_PROTEIN_RESPONSE	10	0.641804	1.50341	0.0438931	0.407776	697	tags=30%, list=4%, signal=29%	PTPN1/TMEM33/NCK1
GO_CARDIOBLAST_DIFFERENTIATION	GO_CARDIOBLAST_DIFFERENTIATION	GO_CARDIOBLAST_DIFFERENTIATION	18	0.643803	1.76413	0.00582524	0.197674	667	tags=22%, list=3%, signal=21%	WNT3A/NRG1/PRICKLE1/TBXT
GO_RESPONSE_TO_VITAMIN_E	GO_RESPONSE_TO_VITAMIN_E	GO_RESPONSE_TO_VITAMIN_E	10	0.643861	1.50822	0.0438931	0.407776	1230	tags=30%, list=6%, signal=28%	CCND1/HMGCS1/LEP
GO_CELLULAR_LIPID_BIOSYNTHETIC_PROCESS	GO_CELLULAR_LIPID_BIOSYNTHETIC_PROCESS	GO_CELLULAR_LIPID_BIOSYNTHETIC_PROCESS	10	0.644739	1.51028	0.0438931	0.407776	4519	tags=60%, list=23%, signal=46%	CYP26C1/CYP26B1/FDFT1/FASN/CYP26A1/AGPS
GO_POSITIVE_REGULATION_OF_PROTEIN_EXPORT_FROM_NUCLEUS	GO_POSITIVE_REGULATION_OF_PROTEIN_EXPORT_FROM_NUCLEUS	GO_POSITIVE_REGULATION_OF_PROTEIN_EXPORT_FROM_NUCLEUS	19	0.64597	1.8024	0.00578035	0.197674	495	tags=32%, list=3%, signal=31%	GAS6/PPM1A/MDM2/BAG3/CTDSPL2/RIOK2
GO_NEUROTRANSMITTER_GATED_ION_CHANNEL_CLUSTERING	GO_NEUROTRANSMITTER_GATED_ION_CHANNEL_CLUSTERING	GO_NEUROTRANSMITTER_GATED_ION_CHANNEL_CLUSTERING	12	0.646921	1.59374	0.0304183	0.365105	202	tags=17%, list=1%, signal=17%	SHANK3/GPHN
GO_NETRIN_ACTIVATED_SIGNALING_PATHWAY	GO_NETRIN_ACTIVATED_SIGNALING_PATHWAY	GO_NETRIN_ACTIVATED_SIGNALING_PATHWAY	12	0.646927	1.59375	0.0304183	0.365105	4172	tags=58%, list=22%, signal=46%	TUBB3/SIAH1/UNC5A/PTK2/DCC/UNC5B/SIAH2
GO_REGULATION_OF_HEPATOCYTE_PROLIFERATION	GO_REGULATION_OF_HEPATOCYTE_PROLIFERATION	GO_REGULATION_OF_HEPATOCYTE_PROLIFERATION	13	0.647043	1.63739	0.0227273	0.33476	1250	tags=38%, list=6%, signal=36%	CEACAM1/SULF2/WNT3A/MED1/TNFAIP3
GO_REGULATION_OF_PROTEIN_LOCALIZATION_TO_CHROMOSOME_TELOMERIC_REGION	GO_REGULATION_OF_PROTEIN_LOCALIZATION_TO_CHROMOSOME_TELOMERIC_REGION	GO_REGULATION_OF_PROTEIN_LOCALIZATION_TO_CHROMOSOME_TELOMERIC_REGION	11	0.647143	1.5705	0.0357143	0.38568	3157	tags=45%, list=16%, signal=38%	CCT5/CCT3/CCT8/GNL3/CCT2
GO_MYOSIN_HEAVY_CHAIN_BINDING	GO_MYOSIN_HEAVY_CHAIN_BINDING	GO_MYOSIN_HEAVY_CHAIN_BINDING	13	0.647361	1.6382	0.0208333	0.329223	3270	tags=46%, list=17%, signal=38%	AXL/MYL3/MYL12B/NKD2/CORO1A/MYL2
GO_FIBRONECTIN_BINDING	GO_FIBRONECTIN_BINDING	GO_FIBRONECTIN_BINDING	25	0.649159	1.95606	0.00200401	0.125903	1932	tags=32%, list=10%, signal=29%	ITGB1/IGFBP6/ITGA3/SDC4/ITGA4/CTSL/LPA/FSTL3
GO_POSITIVE_REGULATION_OF_AUTOPHAGOSOME_ASSEMBLY	GO_POSITIVE_REGULATION_OF_AUTOPHAGOSOME_ASSEMBLY	GO_POSITIVE_REGULATION_OF_AUTOPHAGOSOME_ASSEMBLY	11	0.650024	1.5775	0.0319549	0.373401	3176	tags=36%, list=17%, signal=30%	PIP4K2A/KIAA1324/SH3GLB1/BECN1
GO_CELL_CELL_ADHESION_MEDIATED_BY_INTEGRIN	GO_CELL_CELL_ADHESION_MEDIATED_BY_INTEGRIN	GO_CELL_CELL_ADHESION_MEDIATED_BY_INTEGRIN	16	0.651396	1.73055	0.00776699	0.221712	2163	tags=38%, list=11%, signal=33%	ITGB1/ADAM9/ITGA4/PODXL/SWAP70/ITGA5
GO_STRUCTURAL_CONSTITUENT_OF_POSTSYNAPSE	GO_STRUCTURAL_CONSTITUENT_OF_POSTSYNAPSE	GO_STRUCTURAL_CONSTITUENT_OF_POSTSYNAPSE	13	0.652129	1.65026	0.0170455	0.305581	474	tags=23%, list=2%, signal=23%	ACTB/ACTG1/POTEKP
GO_ADENYLATE_CYCLASE_ACTIVATING_DOPAMINE_RECEPTOR_SIGNALING_PATHWAY	GO_ADENYLATE_CYCLASE_ACTIVATING_DOPAMINE_RECEPTOR_SIGNALING_PATHWAY	GO_ADENYLATE_CYCLASE_ACTIVATING_DOPAMINE_RECEPTOR_SIGNALING_PATHWAY	11	0.654905	1.58934	0.0300752	0.365105	5647	tags=64%, list=29%, signal=45%	GNAL/DRD5/DRD3/GNAS/OPRM1/ADCY5/GNB1
GO_REGULATION_OF_VASCULOGENESIS	GO_REGULATION_OF_VASCULOGENESIS	GO_REGULATION_OF_VASCULOGENESIS	13	0.6554	1.65854	0.0132576	0.278873	1578	tags=31%, list=8%, signal=28%	CEACAM1/EMP2/HEY1/RAP1A
GO_CELLULAR_RESPONSE_TO_LOW_DENSITY_LIPOPROTEIN_PARTICLE_STIMULUS	GO_CELLULAR_RESPONSE_TO_LOW_DENSITY_LIPOPROTEIN_PARTICLE_STIMULUS	GO_CELLULAR_RESPONSE_TO_LOW_DENSITY_LIPOPROTEIN_PARTICLE_STIMULUS	20	0.655681	1.84409	0.00403226	0.176914	4123	tags=60%, list=21%, signal=47%	HMGCS1/ITGB1/LDLR/CD81/PPARG/FGF21/MIR302A/ITGB2/MIR758/SOCS5/SREBF2/CD9
GO_HYALURONAN_BIOSYNTHETIC_PROCESS	GO_HYALURONAN_BIOSYNTHETIC_PROCESS	GO_HYALURONAN_BIOSYNTHETIC_PROCESS	12	0.656555	1.61747	0.026616	0.345156	113	tags=17%, list=1%, signal=17%	HAS3/HYAL1
GO_REGULATION_OF_CELLULAR_RESPONSE_TO_OSMOTIC_STRESS	GO_REGULATION_OF_CELLULAR_RESPONSE_TO_OSMOTIC_STRESS	GO_REGULATION_OF_CELLULAR_RESPONSE_TO_OSMOTIC_STRESS	10	0.657971	1.54128	0.0305344	0.365105	2430	tags=40%, list=13%, signal=35%	BAD/YBX3/SLC25A23/LETM1
GO_NEGATIVE_REGULATION_OF_LONG_TERM_SYNAPTIC_POTENTIATION	GO_NEGATIVE_REGULATION_OF_LONG_TERM_SYNAPTIC_POTENTIATION	GO_NEGATIVE_REGULATION_OF_LONG_TERM_SYNAPTIC_POTENTIATION	12	0.66061	1.62746	0.0247148	0.344283	4311	tags=67%, list=22%, signal=52%	PRNP/ADORA1/APP/AGER/EPHA4/ABL1/PTN/CX3CR1
GO_BLOOD_VESSEL_ENDOTHELIAL_CELL_DIFFERENTIATION	GO_BLOOD_VESSEL_ENDOTHELIAL_CELL_DIFFERENTIATION	GO_BLOOD_VESSEL_ENDOTHELIAL_CELL_DIFFERENTIATION	11	0.661492	1.60533	0.0244361	0.342284	1020	tags=27%, list=5%, signal=26%	HEY1/NRP1/CCM2
GO_TERPENOID_BIOSYNTHETIC_PROCESS	GO_TERPENOID_BIOSYNTHETIC_PROCESS	GO_TERPENOID_BIOSYNTHETIC_PROCESS	16	0.662693	1.76057	0.0038835	0.176914	1433	tags=31%, list=7%, signal=29%	HMGCS1/ALDH1A3/RBP1/HMGCS2/LSS
GO_MEMBRANE_RAFT_ASSEMBLY	GO_MEMBRANE_RAFT_ASSEMBLY	GO_MEMBRANE_RAFT_ASSEMBLY	13	0.664515	1.68161	0.0113636	0.258076	1025	tags=38%, list=5%, signal=36%	S100A10/EMP2/CAV2/CAV1/ANXA2
GO_CHONDROITIN_SULFATE_BIOSYNTHETIC_PROCESS	GO_CHONDROITIN_SULFATE_BIOSYNTHETIC_PROCESS	GO_CHONDROITIN_SULFATE_BIOSYNTHETIC_PROCESS	22	0.665676	1.94624	0.00197628	0.125903	3049	tags=45%, list=16%, signal=38%	VCAN/XYLT1/XYLT2/BGN/CSPG5/CHST11/CSPG4/CSGALNACT2/DSE/SLC35D1
GO_CARDIAC_MUSCLE_CELL_MYOBLAST_DIFFERENTIATION	GO_CARDIAC_MUSCLE_CELL_MYOBLAST_DIFFERENTIATION	GO_CARDIAC_MUSCLE_CELL_MYOBLAST_DIFFERENTIATION	10	0.667491	1.56358	0.0209924	0.329637	667	tags=30%, list=3%, signal=29%	NRG1/PRICKLE1/TBXT
GO_RESPONSE_TO_LAMINAR_FLUID_SHEAR_STRESS	GO_RESPONSE_TO_LAMINAR_FLUID_SHEAR_STRESS	GO_RESPONSE_TO_LAMINAR_FLUID_SHEAR_STRESS	14	0.667611	1.72783	0.00574713	0.197674	1717	tags=43%, list=9%, signal=39%	TGFB3/ADAM9/ETS1/ASS1/KLF2/SMAD7
GO_BLEB_ASSEMBLY	GO_BLEB_ASSEMBLY	GO_BLEB_ASSEMBLY	10	0.668477	1.56589	0.0209924	0.329637	2338	tags=50%, list=12%, signal=44%	EMP1/EMP2/ROCK1/ANLN/PMP22
GO_REGULATION_OF_RESPIRATORY_GASEOUS_EXCHANGE_BY_NERVOUS_SYSTEM_PROCESS	GO_REGULATION_OF_RESPIRATORY_GASEOUS_EXCHANGE_BY_NERVOUS_SYSTEM_PROCESS	GO_REGULATION_OF_RESPIRATORY_GASEOUS_EXCHANGE_BY_NERVOUS_SYSTEM_PROCESS	12	0.668489	1.64687	0.0190114	0.314662	1601	tags=25%, list=8%, signal=23%	PBX3/ADORA1/NLGN2
GO_PROTEIN_COMPLEX_INVOLVED_IN_CELL_ADHESION	GO_PROTEIN_COMPLEX_INVOLVED_IN_CELL_ADHESION	GO_PROTEIN_COMPLEX_INVOLVED_IN_CELL_ADHESION	31	0.670652	2.12976	0.00194175	0.125903	2163	tags=29%, list=11%, signal=26%	ITGB5/ITGB1/ITGA3/ITGA6/ITGA4/ITGB8/ITGA9/CD80/ITGA5
GO_ACTIVATION_OF_CYSTEINE_TYPE_ENDOPEPTIDASE_ACTIVITY	GO_ACTIVATION_OF_CYSTEINE_TYPE_ENDOPEPTIDASE_ACTIVITY	GO_ACTIVATION_OF_CYSTEINE_TYPE_ENDOPEPTIDASE_ACTIVITY	13	0.679045	1.71838	0.00757576	0.221712	1134	tags=31%, list=6%, signal=29%	CYFIP2/BAD/PERP/TBC1D10A
GO_NEGATIVE_REGULATION_OF_CALCINEURIN_MEDIATED_SIGNALING	GO_NEGATIVE_REGULATION_OF_CALCINEURIN_MEDIATED_SIGNALING	GO_NEGATIVE_REGULATION_OF_CALCINEURIN_MEDIATED_SIGNALING	15	0.68123	1.78231	0.00192678	0.125903	811	tags=20%, list=4%, signal=19%	FHL2/PRNP/DYRK2
GO_REGULATION_OF_DEFENSE_RESPONSE_TO_BACTERIUM	GO_REGULATION_OF_DEFENSE_RESPONSE_TO_BACTERIUM	GO_REGULATION_OF_DEFENSE_RESPONSE_TO_BACTERIUM	17	0.685611	1.84455	0.00194175	0.125903	4009	tags=53%, list=21%, signal=42%	KLK5/KLK7/SIRT2/GRN/SPINK5/F2RL1/FOXP1/UNC13B/CXCL6
GO_HOST_CELL_CYTOPLASM	GO_HOST_CELL_CYTOPLASM	GO_HOST_CELL_CYTOPLASM	11	0.690817	1.67649	0.0131579	0.277705	5167	tags=82%, list=27%, signal=60%	GBP6/SCO1/MUC7/GBP7/RAB29/LMAN1/BICD1/PF4/GBP4
GO_PROTOPORPHYRINOGEN_IX_METABOLIC_PROCESS	GO_PROTOPORPHYRINOGEN_IX_METABOLIC_PROCESS	GO_PROTOPORPHYRINOGEN_IX_METABOLIC_PROCESS	10	0.692073	1.62116	0.0171756	0.305581	1816	tags=40%, list=9%, signal=36%	IREB2/ALAS2/ALAS1/FECH
GO_RENAL_FILTRATION	GO_RENAL_FILTRATION	GO_RENAL_FILTRATION	19	0.692858	1.93323	0.00192678	0.125903	2491	tags=42%, list=13%, signal=37%	GAS6/SULF2/EMP2/ITGA3/ADORA1/MYO1E/F2RL1/TBC1D8B
GO_LAMININ_COMPLEX	GO_LAMININ_COMPLEX	GO_LAMININ_COMPLEX	10	0.694165	1.62606	0.0152672	0.298207	405	tags=30%, list=2%, signal=29%	LAMA3/LAMC2/LAMB3
GO_REGULATION_OF_GLOMERULAR_FILTRATION	GO_REGULATION_OF_GLOMERULAR_FILTRATION	GO_REGULATION_OF_GLOMERULAR_FILTRATION	10	0.696712	1.63203	0.0133588	0.279863	1867	tags=40%, list=10%, signal=36%	GAS6/EMP2/ADORA1/F2RL1
GO_CD4_POSITIVE_ALPHA_BETA_T_CELL_PROLIFERATION	GO_CD4_POSITIVE_ALPHA_BETA_T_CELL_PROLIFERATION	GO_CD4_POSITIVE_ALPHA_BETA_T_CELL_PROLIFERATION	10	0.704186	1.64953	0.0114504	0.258076	2575	tags=50%, list=13%, signal=43%	TWSG1/TGFBR2/CD81/LGALS9C/LGALS9B
GO_MACROMOLECULE_DEPALMITOYLATION	GO_MACROMOLECULE_DEPALMITOYLATION	GO_MACROMOLECULE_DEPALMITOYLATION	10	0.709569	1.66214	0.00954198	0.238095	3684	tags=80%, list=19%, signal=65%	LYPLA1/ABHD17A/ABHD13/ABHD17B/PPT2/LYPLAL1/LYPLA2/ABHD12
GO_PALMITOYL_PROTEIN_HYDROLASE_ACTIVITY	GO_PALMITOYL_PROTEIN_HYDROLASE_ACTIVITY	GO_PALMITOYL_PROTEIN_HYDROLASE_ACTIVITY	10	0.709569	1.66214	0.00954198	0.238095	3684	tags=80%, list=19%, signal=65%	LYPLA1/ABHD17A/ABHD13/ABHD17B/PPT2/LYPLAL1/LYPLA2/ABHD12
GO_CELLULAR_COPPER_ION_HOMEOSTASIS	GO_CELLULAR_COPPER_ION_HOMEOSTASIS	GO_CELLULAR_COPPER_ION_HOMEOSTASIS	12	0.724536	1.78495	0.00380228	0.176914	2793	tags=58%, list=15%, signal=50%	PRNP/ATP7B/MT2A/ATOX1/SCO1/APP/ARF1
GO_CHONDROITIN_SULFATE_CATABOLIC_PROCESS	GO_CHONDROITIN_SULFATE_CATABOLIC_PROCESS	GO_CHONDROITIN_SULFATE_CATABOLIC_PROCESS	14	0.725323	1.8772	0.00191571	0.125903	1676	tags=43%, list=9%, signal=39%	VCAN/HYAL1/IDS/BGN/CSPG5/CSPG4
GO_SEQUESTERING_OF_METAL_ION	GO_SEQUESTERING_OF_METAL_ION	GO_SEQUESTERING_OF_METAL_ION	14	0.726176	1.8794	0.00191571	0.125903	695	tags=29%, list=4%, signal=28%	SLC30A3/AP3D1/FTH1/SLC30A7
GO_AMP_METABOLIC_PROCESS	GO_AMP_METABOLIC_PROCESS	GO_AMP_METABOLIC_PROCESS	12	0.729803	1.79792	0.00380228	0.176914	1392	tags=33%, list=7%, signal=31%	NT5E/AK4/ADK/AK3
GO_CASPASE_BINDING	GO_CASPASE_BINDING	GO_CASPASE_BINDING	10	0.738304	1.72945	0.00381679	0.176914	1038	tags=30%, list=5%, signal=28%	MAGEA3/RIOK3/CARD16
GO_POSITIVE_REGULATION_OF_HISTONE_H3_K9_METHYLATION	GO_POSITIVE_REGULATION_OF_HISTONE_H3_K9_METHYLATION	GO_POSITIVE_REGULATION_OF_HISTONE_H3_K9_METHYLATION	11	0.74737	1.81374	0.0037594	0.176914	1372	tags=36%, list=7%, signal=34%	RIF1/DMRTC2/MYB/BRCA1
GO_OXIDOREDUCTASE_ACTIVITY_ACTING_ON_A_SULFUR_GROUP_OF_DONORS_NAD_P_AS_ACCEPTOR	GO_OXIDOREDUCTASE_ACTIVITY_ACTING_ON_A_SULFUR_GROUP_OF_DONORS_NAD_P_AS_ACCEPTOR	GO_OXIDOREDUCTASE_ACTIVITY_ACTING_ON_A_SULFUR_GROUP_OF_DONORS_NAD_P_AS_ACCEPTOR	11	0.750384	1.82105	0.0037594	0.176914	2316	tags=36%, list=12%, signal=32%	SELENOT/NXN/TXNRD1/PRDX3
GO_REGULATION_OF_GONADOTROPIN_SECRETION	GO_REGULATION_OF_GONADOTROPIN_SECRETION	GO_REGULATION_OF_GONADOTROPIN_SECRETION	10	0.819539	1.91974	0.0019084	0.125903	2462	tags=70%, list=13%, signal=61%	FOXL2/TACR2/LEP/SMAD4/NPVF/CRH/KISS1
GO_GONADOTROPIN_SECRETION	GO_GONADOTROPIN_SECRETION	GO_GONADOTROPIN_SECRETION	13	0.822298	2.08089	0.00189394	0.125903	2462	tags=69%, list=13%, signal=60%	FOXD1/FOXL2/TACR2/LEP/SMAD4/NPVF/TMF1/CRH/KISS1
GO_HEMIDESMOSOME_ASSEMBLY	GO_HEMIDESMOSOME_ASSEMBLY	GO_HEMIDESMOSOME_ASSEMBLY	11	0.866278	2.10231	0.0018797	0.125903	549	tags=64%, list=3%, signal=62%	COL17A1/LAMA3/LAMC2/LAMB3/CD151/PLEC/ITGA6
Gene Ontologies list sorted for increasing enrichment score values (abs es ≥0.60, P-value <0.05) in the siTRAP1 0.5% O2 vs. siNEG 20% O2 experimental condition.

## Sheet: P_siTRAP1 05%O2 vs. siNEG 05%O2
Table SIII. Continued.
row.names	ID	Description	setSize	enrichmentScore	NES	P-value	Q-value	rank	leading_edge	core_enrichment
FUNG_IL2_SIGNALING_1	FUNG_IL2_SIGNALING_1	FUNG_IL2_SIGNALING_1	10	0.811679	1.70532	0.00350263	0.0939221	676	tags=40%, list=4%, signal=39%	MAT2A/NOLC1/DKC1/NOP56
REACTOME_TYPE_I_HEMIDESMOSOME_ASSEMBLY	REACTOME_TYPE_I_HEMIDESMOSOME_ASSEMBLY	REACTOME_TYPE_I_HEMIDESMOSOME_ASSEMBLY	11	0.788796	1.69097	0.0103986	0.148994	1494	tags=55%, list=8%, signal=50%	LAMA3/PLEC/LAMB3/COL17A1/ITGB4/LAMC2
BREUHAHN_GROWTH_FACTOR_SIGNALING_IN_LIVER_CANCER	BREUHAHN_GROWTH_FACTOR_SIGNALING_IN_LIVER_CANCER	BREUHAHN_GROWTH_FACTOR_SIGNALING_IN_LIVER_CANCER	13	0.78034	1.73679	0.00338983	0.0920935	1195	tags=38%, list=6%, signal=36%	AXIN1/TGFA/HGF/DACT1/EGFR
SUZUKI_AMPLIFIED_IN_ORAL_CANCER	SUZUKI_AMPLIFIED_IN_ORAL_CANCER	SUZUKI_AMPLIFIED_IN_ORAL_CANCER	16	0.775486	1.80764	0.00335008	0.0916164	2733	tags=44%, list=14%, signal=38%	CCND1/MMP7/EGFR/SUPT5H/CCND2/YAP1/GAS6
REACTOME_CS_DS_DEGRADATION	REACTOME_CS_DS_DEGRADATION	REACTOME_CS_DS_DEGRADATION	14	0.770503	1.73428	0.00335008	0.0916164	1233	tags=43%, list=6%, signal=40%	HYAL1/CSPG4/HYAL3/VCAN/BCAN/ARSB
PID_INTEGRIN4_PATHWAY	PID_INTEGRIN4_PATHWAY	PID_INTEGRIN4_PATHWAY	10	0.770016	1.61779	0.0192644	0.198384	1494	tags=40%, list=8%, signal=37%	LAMA3/LAMB3/ITGB4/LAMC2
SARTIPY_NORMAL_AT_INSULIN_RESISTANCE_UP	SARTIPY_NORMAL_AT_INSULIN_RESISTANCE_UP	SARTIPY_NORMAL_AT_INSULIN_RESISTANCE_UP	26	0.760817	1.98297	0.00158479	0.0798089	1638	tags=42%, list=9%, signal=39%	AK4/PHLDA1/SYNJ2/TUBB6/SLC25A28/BYSL/SRXN1/NOP56/FOSL1/HMOX1/NOP58
REACTOME_HYALURONAN_METABOLISM	REACTOME_HYALURONAN_METABOLISM	REACTOME_HYALURONAN_METABOLISM	16	0.760366	1.7724	0.00335008	0.0916164	637	tags=31%, list=3%, signal=30%	HYAL1/HAS3/HYAL3/ABCC5/HYAL2
REACTOME_DISSOLUTION_OF_FIBRIN_CLOT	REACTOME_DISSOLUTION_OF_FIBRIN_CLOT	REACTOME_DISSOLUTION_OF_FIBRIN_CLOT	13	0.740549	1.64823	0.0101695	0.147868	1791	tags=46%, list=9%, signal=42%	SERPINF2/SERPINE1/PLAUR/PLAU/ANXA2/S100A10
REACTOME_HYALURONAN_UPTAKE_AND_DEGRADATION	REACTOME_HYALURONAN_UPTAKE_AND_DEGRADATION	REACTOME_HYALURONAN_UPTAKE_AND_DEGRADATION	12	0.740237	1.61147	0.0240964	0.212867	2390	tags=42%, list=12%, signal=37%	HYAL1/HYAL3/HYAL2/SLC9A1/HMMR
FARMER_BREAST_CANCER_CLUSTER_6	FARMER_BREAST_CANCER_CLUSTER_6	FARMER_BREAST_CANCER_CLUSTER_6	14	0.739872	1.66533	0.00837521	0.139117	354	tags=21%, list=2%, signal=21%	MLPH/RHOB/REEP5
GARGALOVIC_RESPONSE_TO_OXIDIZED_PHOSPHOLIPIDS_MAGENTA_DN	GARGALOVIC_RESPONSE_TO_OXIDIZED_PHOSPHOLIPIDS_MAGENTA_DN	GARGALOVIC_RESPONSE_TO_OXIDIZED_PHOSPHOLIPIDS_MAGENTA_DN	11	0.736169	1.57815	0.0277296	0.221987	2129	tags=45%, list=11%, signal=40%	IMP3/AGGF1/KBTBD6/GPAM/ELMSAN1
SANCHEZ_MDM2_TARGETS	SANCHEZ_MDM2_TARGETS	SANCHEZ_MDM2_TARGETS	12	0.735604	1.60138	0.0240964	0.212867	2558	tags=33%, list=13%, signal=29%	CCND1/IGFBP6/CDKN1A/FCGRT
YAMANAKA_GLIOBLASTOMA_SURVIVAL_UP	YAMANAKA_GLIOBLASTOMA_SURVIVAL_UP	YAMANAKA_GLIOBLASTOMA_SURVIVAL_UP	11	0.73541	1.57653	0.0277296	0.221987	466	tags=27%, list=2%, signal=27%	EMILIN2/SLC2A3/ITGA5
REACTOME_CASPASE_ACTIVATION_VIA_DEATH_RECEPTORS_IN_THE_PRESENCE_OF_LIGAND	REACTOME_CASPASE_ACTIVATION_VIA_DEATH_RECEPTORS_IN_THE_PRESENCE_OF_LIGAND	REACTOME_CASPASE_ACTIVATION_VIA_DEATH_RECEPTORS_IN_THE_PRESENCE_OF_LIGAND	12	0.731959	1.59345	0.0240964	0.212867	1908	tags=42%, list=10%, signal=38%	RIPK1/TRADD/TICAM1/FAS/TNFRSF10B
SASAKI_TARGETS_OF_TP73_AND_TP63	SASAKI_TARGETS_OF_TP73_AND_TP63	SASAKI_TARGETS_OF_TP73_AND_TP63	10	0.728825	1.53125	0.0315236	0.231219	2144	tags=50%, list=11%, signal=44%	IL4R/MT1X/JAG2/MT2A/ITGB1
HEIDENBLAD_AMPLICON_12P11_12_DN	HEIDENBLAD_AMPLICON_12P11_12_DN	HEIDENBLAD_AMPLICON_12P11_12_DN	20	0.724326	1.79576	0.00485437	0.109541	1118	tags=25%, list=6%, signal=24%	C1orf116/ZBED4/TRAPPC2B/INO80/CDK13
SA_REG_CASCADE_OF_CYCLIN_EXPR	SA_REG_CASCADE_OF_CYCLIN_EXPR	SA_REG_CASCADE_OF_CYCLIN_EXPR	13	0.722641	1.60837	0.020339	0.201841	392	tags=23%, list=2%, signal=23%	CCND1/CCNE1/CCNE2
BIOCARTA_RELA_PATHWAY	BIOCARTA_RELA_PATHWAY	BIOCARTA_RELA_PATHWAY	12	0.718615	1.5644	0.0275387	0.221677	431	tags=25%, list=2%, signal=24%	RIPK1/TRADD/TRAF6
KYNG_ENVIRONMENTAL_STRESS_RESPONSE_NOT_BY_UV_IN_WS	KYNG_ENVIRONMENTAL_STRESS_RESPONSE_NOT_BY_UV_IN_WS	KYNG_ENVIRONMENTAL_STRESS_RESPONSE_NOT_BY_UV_IN_WS	12	0.712609	1.55132	0.0309811	0.229946	1548	tags=42%, list=8%, signal=38%	RHOB/ARPC1B/HGF/ZNF507/TAF1C
VERRECCHIA_RESPONSE_TO_TGFB1_C1	VERRECCHIA_RESPONSE_TO_TGFB1_C1	VERRECCHIA_RESPONSE_TO_TGFB1_C1	18	0.710217	1.69892	0.00662252	0.126945	1453	tags=39%, list=8%, signal=36%	RHOB/SERPINE1/NOTCH2/VCAN/ITGA3/IGFBP3/LRRC17
MATZUK_EARLY_ANTRAL_FOLLICLE	MATZUK_EARLY_ANTRAL_FOLLICLE	MATZUK_EARLY_ANTRAL_FOLLICLE	13	0.709848	1.57989	0.020339	0.201841	4013	tags=46%, list=21%, signal=37%	SRC/NR2C2/UBE3A/CCND2/TAF4B/FSHR
REACTOME_ACTIVATION_OF_AMPK_DOWNSTREAM_OF_NMDARS	REACTOME_ACTIVATION_OF_AMPK_DOWNSTREAM_OF_NMDARS	REACTOME_ACTIVATION_OF_AMPK_DOWNSTREAM_OF_NMDARS	27	0.709435	1.86188	0.00158479	0.0798089	2646	tags=56%, list=14%, signal=48%	CALM1/TUBB6/PRKAG2/TUBA3D/PRKAB2/TUBA1A/TUBA1C/TUBB4B/TUBA4A/PRKAA1/PRKAB1/TUBB8/TUBA1B/TUBB2A/CAMKK2
REACTOME_TNFR1_INDUCED_PROAPOPTOTIC_SIGNALING	REACTOME_TNFR1_INDUCED_PROAPOPTOTIC_SIGNALING	REACTOME_TNFR1_INDUCED_PROAPOPTOTIC_SIGNALING	12	0.708933	1.54332	0.0344234	0.242164	412	tags=25%, list=2%, signal=24%	USP21/RIPK1/TRADD
REACTOME_ANCHORING_FIBRIL_FORMATION	REACTOME_ANCHORING_FIBRIL_FORMATION	REACTOME_ANCHORING_FIBRIL_FORMATION	14	0.704676	1.58611	0.0201005	0.201841	2981	tags=50%, list=15%, signal=42%	LAMA3/COL4A5/LAMB3/LAMC2/BMP1/COL7A1/COL1A1
LE_SKI_TARGETS_UP	LE_SKI_TARGETS_UP	LE_SKI_TARGETS_UP	17	0.703535	1.66175	0.00996678	0.145949	1213	tags=24%, list=6%, signal=22%	NRP1/NRG1/ITGB4/KRT19
MALIK_REPRESSED_BY_ESTROGEN	MALIK_REPRESSED_BY_ESTROGEN	MALIK_REPRESSED_BY_ESTROGEN	13	0.699105	1.55599	0.0254237	0.214775	762	tags=31%, list=4%, signal=30%	BIK/CERK/MXD4/CDH3
OZANNE_AP1_TARGETS_UP	OZANNE_AP1_TARGETS_UP	OZANNE_AP1_TARGETS_UP	13	0.697887	1.55327	0.0271186	0.21958	2051	tags=54%, list=11%, signal=48%	EZR/ARPC1B/EGFR/CTSL/CAPG/KLHL41/STAT6
MAINA_VHL_TARGETS_DN	MAINA_VHL_TARGETS_DN	MAINA_VHL_TARGETS_DN	13	0.69782	1.55312	0.0288136	0.221987	1306	tags=31%, list=7%, signal=29%	CCND1/F3/SLC16A3/GAL3ST1
SCHAVOLT_TARGETS_OF_TP53_AND_TP63	SCHAVOLT_TARGETS_OF_TP53_AND_TP63	SCHAVOLT_TARGETS_OF_TP53_AND_TP63	15	0.694591	1.60595	0.0232172	0.212518	2679	tags=60%, list=14%, signal=52%	TP53I3/PODXL/SFN/VCAN/PCNA/EPHA2/FAS/CDKN1A/CASP1
BONOME_OVARIAN_CANCER_POOR_SURVIVAL_DN	BONOME_OVARIAN_CANCER_POOR_SURVIVAL_DN	BONOME_OVARIAN_CANCER_POOR_SURVIVAL_DN	18	0.684032	1.63628	0.0115894	0.157948	3401	tags=50%, list=18%, signal=41%	TWNK/HDHD3/MTAP/HNRNPU/ASPSCR1/LPAR2/ACOT7/BOP1/SS18
LEI_HOXC8_TARGETS_UP	LEI_HOXC8_TARGETS_UP	LEI_HOXC8_TARGETS_UP	13	0.679993	1.51345	0.040678	0.262057	946	tags=23%, list=5%, signal=22%	HES2/SLC16A3/PMP22
MULLIGAN_NTF3_SIGNALING_VIA_INSR_AND_IGF1R_UP	MULLIGAN_NTF3_SIGNALING_VIA_INSR_AND_IGF1R_UP	MULLIGAN_NTF3_SIGNALING_VIA_INSR_AND_IGF1R_UP	21	0.679673	1.6949	0.00816993	0.137144	3588	tags=48%, list=19%, signal=39%	RCL1/SRSF2/SRXN1/NOP56/HSPA4/EBNA1BP2/GNL3/USP10/MRPL20/ARL4C
BIOCARTA_ARAP_PATHWAY	BIOCARTA_ARAP_PATHWAY	BIOCARTA_ARAP_PATHWAY	17	0.678742	1.60319	0.0249169	0.214362	2795	tags=41%, list=15%, signal=35%	ASAP2/ARFGAP1/CYTH4/CYTH2/CLTB/ARFGAP3/ARFGEF1
REACTOME_METHYLATION	REACTOME_METHYLATION	REACTOME_METHYLATION	12	0.673849	1.46694	0.0499139	0.289584	450	tags=17%, list=2%, signal=16%	MAT2A/N6AMT1
REACTOME_SIGNALING_BY_ACTIVIN	REACTOME_SIGNALING_BY_ACTIVIN	REACTOME_SIGNALING_BY_ACTIVIN	12	0.673767	1.46676	0.0499139	0.289584	3179	tags=42%, list=17%, signal=35%	SMAD3/FSTL3/FOXH1/ACVR2B/ACVR1B
DELACROIX_RAR_TARGETS_DN	DELACROIX_RAR_TARGETS_DN	DELACROIX_RAR_TARGETS_DN	22	0.673707	1.69939	0.00653595	0.126945	1463	tags=27%, list=8%, signal=25%	CCND1/NRP1/EMP1/ECHDC3/TPM2/FSTL1
KEGG_SELENOAMINO_ACID_METABOLISM	KEGG_SELENOAMINO_ACID_METABOLISM	KEGG_SELENOAMINO_ACID_METABOLISM	20	0.666373	1.65208	0.00809061	0.136367	1144	tags=25%, list=6%, signal=24%	MAT2A/MARS2/LCMT2/SEPHS2/GGT1
STANELLE_E2F1_TARGETS	STANELLE_E2F1_TARGETS	STANELLE_E2F1_TARGETS	26	0.665175	1.73369	0.00158479	0.0798089	1203	tags=31%, list=6%, signal=29%	CCND1/MAP3K5/SERPINF2/CCNE1/CCNE2/GRAMD4/FGFR3/BID
BIOCARTA_CARM_ER_PATHWAY	BIOCARTA_CARM_ER_PATHWAY	BIOCARTA_CARM_ER_PATHWAY	25	0.663545	1.70575	0.00324675	0.0915038	1525	tags=24%, list=8%, signal=22%	CCND1/NRIP1/TBP/BRCA1/HDAC6/SRA1
INAMURA_LUNG_CANCER_SCC_DN	INAMURA_LUNG_CANCER_SCC_DN	INAMURA_LUNG_CANCER_SCC_DN	13	0.663533	1.47681	0.0491525	0.288726	2405	tags=38%, list=13%, signal=34%	CAV1/MCL1/SSC4D/NR2F2/ADARB1
VERRECCHIA_RESPONSE_TO_TGFB1_C5	VERRECCHIA_RESPONSE_TO_TGFB1_C5	VERRECCHIA_RESPONSE_TO_TGFB1_C5	20	0.658774	1.63324	0.012945	0.1632	4680	tags=65%, list=24%, signal=49%	ARHGAP1/ITGA5/DVL3/EPHA2/DDR1/NME4/MMP11/SMO/RHOD/ILK/ITGA4/CTNNA1/TNFRSF1A
DACOSTA_UV_RESPONSE_VIA_ERCC3_XPCS_UP	DACOSTA_UV_RESPONSE_VIA_ERCC3_XPCS_UP	DACOSTA_UV_RESPONSE_VIA_ERCC3_XPCS_UP	21	0.657893	1.64058	0.00980392	0.144589	1370	tags=33%, list=7%, signal=31%	RPUSD2/CCNT2/MED6/ADO/IRF1/TRIM21/FRAT2
BROWNE_HCMV_INFECTION_8HR_DN	BROWNE_HCMV_INFECTION_8HR_DN	BROWNE_HCMV_INFECTION_8HR_DN	42	0.655209	1.89301	0.0014881	0.0786042	3195	tags=43%, list=17%, signal=36%	NAV3/SMAD3/XPC/MRPS31/PLEKHO2/ZNF7/SACS/TFCP2/PLAU/PLIN2/ITGA3/FEM1B/MYC/ANKMY2/CDC42EP3/PIM1/MAGEA10/VDR
LI_ADIPOGENESIS_BY_ACTIVATED_PPARG	LI_ADIPOGENESIS_BY_ACTIVATED_PPARG	LI_ADIPOGENESIS_BY_ACTIVATED_PPARG	17	0.651179	1.53809	0.0332226	0.236058	2094	tags=35%, list=11%, signal=31%	CEBPA/NR1H2/PC/FASN/CFD/NR1H3
REACTOME_INTEGRIN_SIGNALING	REACTOME_INTEGRIN_SIGNALING	REACTOME_INTEGRIN_SIGNALING	27	0.65106	1.70867	0.00316957	0.0913769	3059	tags=41%, list=16%, signal=34%	CSK/SRC/PTPN1/SOS1/BCAR1/RAP1B/RASGRP2/SHC1/PDPK1/CRK/FGG
REACTOME_POST_CHAPERONIN_TUBULIN_FOLDING_PATHWAY	REACTOME_POST_CHAPERONIN_TUBULIN_FOLDING_PATHWAY	REACTOME_POST_CHAPERONIN_TUBULIN_FOLDING_PATHWAY	22	0.649993	1.63957	0.0114379	0.156919	2502	tags=45%, list=13%, signal=40%	TUBB6/TBCC/TUBA3D/TUBA1A/TUBA1C/TUBB4B/TUBA4A/TBCD/TUBA1B/TUBB2A
NAKAMURA_METASTASIS_MODEL_UP	NAKAMURA_METASTASIS_MODEL_UP	NAKAMURA_METASTASIS_MODEL_UP	41	0.649906	1.86717	0.00149701	0.0786042	2502	tags=41%, list=13%, signal=36%	TUBB6/GJB3/SLC16A3/MALL/COL17A1/FRMD8/HS3ST1/AKAP13/TOLLIP/FOSL1/CMTM3/GGA2/DDX24/LAPTM5/HOXB7/STX4/TUBB2A
REACTOME_REGULATION_OF_RUNX1_EXPRESSION_AND_ACTIVITY	REACTOME_REGULATION_OF_RUNX1_EXPRESSION_AND_ACTIVITY	REACTOME_REGULATION_OF_RUNX1_EXPRESSION_AND_ACTIVITY	17	0.646641	1.52737	0.0332226	0.236058	2574	tags=41%, list=13%, signal=36%	CCND1/SRC/RUNX1/CDK6/TNRC6A/CCND2/TNRC6B
BIOCARTA_NFKB_PATHWAY	BIOCARTA_NFKB_PATHWAY	BIOCARTA_NFKB_PATHWAY	18	0.640351	1.53179	0.0264901	0.217334	1218	tags=28%, list=6%, signal=26%	RIPK1/MYD88/TRADD/TRAF6/MAP3K1
CROMER_METASTASIS_DN	CROMER_METASTASIS_DN	CROMER_METASTASIS_DN	77	0.639238	2.04522	0.00137741	0.0786042	1908	tags=38%, list=10%, signal=34%	SERPINB5/NOP2/PLEC/GJB3/SDC4/BAIAP2/CEBPZ/MALL/CAV2/COL17A1/TTLL12/VDAC3/DTX2/PFKP/FLAD1/CAV1/CUL1/ITGB4/KLK10/TICAM1/RAB31/FLNB/ITGA3/TUBA4A/UBE3C/DDB2/BMP1/S100A11/TNFRSF10B
REACTOME_TRANSPORT_OF_CONNEXONS_TO_THE_PLASMA_MEMBRANE	REACTOME_TRANSPORT_OF_CONNEXONS_TO_THE_PLASMA_MEMBRANE	REACTOME_TRANSPORT_OF_CONNEXONS_TO_THE_PLASMA_MEMBRANE	19	0.63893	1.54256	0.0296053	0.225331	2502	tags=47%, list=13%, signal=41%	TUBB6/TUBA3D/TUBA1A/TUBA1C/TUBB4B/TUBA4A/TUBB8/TUBA1B/TUBB2A
REACTOME_DISEASES_ASSOCIATED_WITH_GLYCOSYLATION_PRECURSOR_BIOSYNTHESIS	REACTOME_DISEASES_ASSOCIATED_WITH_GLYCOSYLATION_PRECURSOR_BIOSYNTHESIS	REACTOME_DISEASES_ASSOCIATED_WITH_GLYCOSYLATION_PRECURSOR_BIOSYNTHESIS	18	0.638085	1.52637	0.0264901	0.217334	1751	tags=33%, list=9%, signal=30%	DOLK/GALT/DHDDS/GALE/SRD5A3/NUS1
REACTOME_RRNA_MODIFICATION_IN_THE_NUCLEUS_AND_CYTOSOL	REACTOME_RRNA_MODIFICATION_IN_THE_NUCLEUS_AND_CYTOSOL	REACTOME_RRNA_MODIFICATION_IN_THE_NUCLEUS_AND_CYTOSOL	57	0.630687	1.91743	0.00143678	0.0786042	2775	tags=46%, list=14%, signal=39%	IMP3/RCL1/NOP2/DKC1/UTP4/MPHOSPH10/DIMT1/PWP2/NOP56/UTP3/TSR3/UTP6/IMP4/RRP36/DHX37/UTP15/BMS1/NOP58/NOL11/EMG1/GAR1/WDR75/DDX52/WDR43/SNU13/RRP9
YANG_BREAST_CANCER_ESR1_BULK_DN	YANG_BREAST_CANCER_ESR1_BULK_DN	YANG_BREAST_CANCER_ESR1_BULK_DN	21	0.62841	1.56706	0.0179739	0.190883	2724	tags=48%, list=14%, signal=41%	PFKP/PLAUR/GTPBP4/PLIN2/SIRPA/TTK/CEBPB/KCNK5/MAP3K13/ASPM
PID_ECADHERIN_KERATINOCYTE_PATHWAY	PID_ECADHERIN_KERATINOCYTE_PATHWAY	PID_ECADHERIN_KERATINOCYTE_PATHWAY	19	0.627805	1.5157	0.03125	0.229946	3316	tags=42%, list=17%, signal=35%	SRC/EGFR/RAC1/PLCG1/JUP/PIK3R1/CDH1/AJUBA
GARGALOVIC_RESPONSE_TO_OXIDIZED_PHOSPHOLIPIDS_RED_DN	GARGALOVIC_RESPONSE_TO_OXIDIZED_PHOSPHOLIPIDS_RED_DN	GARGALOVIC_RESPONSE_TO_OXIDIZED_PHOSPHOLIPIDS_RED_DN	25	0.627311	1.61261	0.012987	0.1632	6304	tags=72%, list=33%, signal=48%	SUOX/ZNF436/ZKSCAN4/NR5A2/SESN1/INKA1/SPTLC2/VGLL4/RHOBTB1/TXNIP/RALA/RAB11A/CLEC14A/HLX/CEP68/MLYCD/MAFB/FRY
SMID_BREAST_CANCER_LUMINAL_A_DN	SMID_BREAST_CANCER_LUMINAL_A_DN	SMID_BREAST_CANCER_LUMINAL_A_DN	18	0.624664	1.49427	0.0347682	0.24376	941	tags=22%, list=5%, signal=21%	TTLL4/CCNE1/DKC1/CDCA8
OLSSON_E2F3_TARGETS_UP	OLSSON_E2F3_TARGETS_UP	OLSSON_E2F3_TARGETS_UP	23	0.62388	1.58947	0.012966	0.1632	2898	tags=43%, list=15%, signal=37%	FAM102A/NSFL1C/LAMA4/CA12/TMPRSS4/ELF3/C1orf198/NECTIN1/SERPINH1/DAG1
SIMBULAN_UV_RESPONSE_IMMORTALIZED_DN	SIMBULAN_UV_RESPONSE_IMMORTALIZED_DN	SIMBULAN_UV_RESPONSE_IMMORTALIZED_DN	28	0.620656	1.63852	0.00796178	0.136367	1700	tags=25%, list=9%, signal=23%	CCND1/LAMA3/EMP1/PLEC/CDH3/EGFR/MYC
REACTOME_MET_ACTIVATES_PTK2_SIGNALING	REACTOME_MET_ACTIVATES_PTK2_SIGNALING	REACTOME_MET_ACTIVATES_PTK2_SIGNALING	28	0.618553	1.63297	0.00955414	0.144519	2981	tags=36%, list=15%, signal=30%	LAMA3/LAMB3/SRC/HGF/LAMA4/ITGA3/LAMC2/ITGB1/COL11A1/COL1A1
BIOCARTA_CELLCYCLE_PATHWAY	BIOCARTA_CELLCYCLE_PATHWAY	BIOCARTA_CELLCYCLE_PATHWAY	23	0.618339	1.57535	0.0145867	0.169751	2227	tags=39%, list=12%, signal=35%	CCND1/CCNE1/CDKN2B/CDK6/RBL1/CCNB1/CDC25A/CCND2/CDKN1A
PID_A6B1_A6B4_INTEGRIN_PATHWAY	PID_A6B1_A6B4_INTEGRIN_PATHWAY	PID_A6B1_A6B4_INTEGRIN_PATHWAY	44	0.618023	1.80308	0.0014771	0.0786042	3786	tags=50%, list=20%, signal=40%	LAMA3/RPS6KB1/LAMB3/COL17A1/SFN/ITGB4/LAMA4/PMP22/EGFR/HRAS/YWHAH/LAMC2/RAC1/SHC1/YWHAZ/ITGB1/PIK3R1/CDH1/MST1R/RXRA/LAMA5/YWHAG
SAGIV_CD24_TARGETS_UP	SAGIV_CD24_TARGETS_UP	SAGIV_CD24_TARGETS_UP	21	0.616002	1.53612	0.0228758	0.212281	2795	tags=48%, list=15%, signal=41%	FRYL/CAV1/TRIM8/USP34/MCAM/KLHL22/EDEM3/PHIP/ASPM/ARFGEF1
LU_TUMOR_ANGIOGENESIS_UP	LU_TUMOR_ANGIOGENESIS_UP	LU_TUMOR_ANGIOGENESIS_UP	25	0.615921	1.58333	0.012987	0.1632	2832	tags=48%, list=15%, signal=41%	CCNE1/TYMP/E2F3/JAG2/HEY1/VCAN/EZH2/NOTCH1/MMP9/CCND2/VAV2/EDN1
REACTOME_RHO_GTPASES_ACTIVATE_NADPH_OXIDASES	REACTOME_RHO_GTPASES_ACTIVATE_NADPH_OXIDASES	REACTOME_RHO_GTPASES_ACTIVATE_NADPH_OXIDASES	23	0.615683	1.56859	0.0145867	0.169751	5354	tags=61%, list=28%, signal=44%	PRKCD/PIK3C3/RAC1/NCF1/PIK3R4/NCF4/MAPK14/NOX1/PRKCB/MAPK3/RAC2/CYBA/S100A8/PRKCZ
GAZDA_DIAMOND_BLACKFAN_ANEMIA_ERYTHROID_UP	GAZDA_DIAMOND_BLACKFAN_ANEMIA_ERYTHROID_UP	GAZDA_DIAMOND_BLACKFAN_ANEMIA_ERYTHROID_UP	26	0.613867	1.59996	0.0142631	0.168765	1908	tags=38%, list=10%, signal=35%	PRKX/SEPHS2/UTP6/SOS1/NUFIP1/FAS/LIMK2/DDB2/SESN1/TNFRSF10B
BRACHAT_RESPONSE_TO_CAMPTOTHECIN_UP	BRACHAT_RESPONSE_TO_CAMPTOTHECIN_UP	BRACHAT_RESPONSE_TO_CAMPTOTHECIN_UP	23	0.611503	1.55793	0.0145867	0.169751	4186	tags=57%, list=22%, signal=44%	TP53INP1/TOB1/BTG2/ULK1/CSRNP2/TRAFD1/CDKN1A/EI24/TXNIP/ZFP36L1/GRB10/LRRC2/C9orf116
REACTOME_VEGFR2_MEDIATED_CELL_PROLIFERATION	REACTOME_VEGFR2_MEDIATED_CELL_PROLIFERATION	REACTOME_VEGFR2_MEDIATED_CELL_PROLIFERATION	19	0.610324	1.4735	0.0378289	0.254886	1978	tags=42%, list=10%, signal=38%	CALM1/PRKCD/SRC/KRAS/RASA1/HRAS/PLCG1/PDPK1
OHM_METHYLATED_IN_ADULT_CANCERS	OHM_METHYLATED_IN_ADULT_CANCERS	OHM_METHYLATED_IN_ADULT_CANCERS	25	0.610147	1.56848	0.0162338	0.180986	723	tags=16%, list=4%, signal=15%	CCND1/RBP1/CDKN2B/BRCA1
VERNELL_RETINOBLASTOMA_PATHWAY_DN	VERNELL_RETINOBLASTOMA_PATHWAY_DN	VERNELL_RETINOBLASTOMA_PATHWAY_DN	19	0.609572	1.47168	0.0394737	0.25915	495	tags=21%, list=3%, signal=21%	CCND1/CPA4/SERPINE1/PPFIBP1
RICKMAN_TUMOR_DIFFERENTIATED_WELL_VS_MODERATELY_DN	RICKMAN_TUMOR_DIFFERENTIATED_WELL_VS_MODERATELY_DN	RICKMAN_TUMOR_DIFFERENTIATED_WELL_VS_MODERATELY_DN	103	0.60929	2.0355	0.00131234	0.0786042	2707	tags=40%, list=14%, signal=34%	ARRDC4/OXSR1/TUBB6/CARD10/CDC42EP2/AGPAT4/PKNOX1/NRG1/PLEK2/DNAJB5/LUZP1/DEPDC7/ETS2/SH2D5/CDCP1/SFN/CAV1/FAM83B/KLK10/KLK5/KLC1/RAB31/IFFO2/KCTD5/TUBA4A/DUSP14/USP15/PERP/LRFN4/ARPC5L/NIPA2/NEDD4/MAP4/CDKN1A/MAPK6/IPPK/RPS6KB2/EHD4/SQOR/GOLGA7B/PPP2R2C
DANG_MYC_TARGETS_DN	DANG_MYC_TARGETS_DN	DANG_MYC_TARGETS_DN	28	0.607202	1.60301	0.0127389	0.1632	2144	tags=36%, list=11%, signal=32%	SERPINE1/CEBPA/CDKN2B/PTPN1/ARPC4/PDGFB/MSN/HMOX1/MYC/ITGB1
BIOCARTA_ERK_PATHWAY	BIOCARTA_ERK_PATHWAY	BIOCARTA_ERK_PATHWAY	26	0.607174	1.58252	0.0158479	0.17832	3331	tags=46%, list=17%, signal=38%	PTPRR/SOS1/EGFR/HRAS/MKNK2/STAT3/MYC/SHC1/ITGB1/RAF1/PPP2CA/MKNK1
LUI_THYROID_CANCER_PAX8_PPARG_UP	LUI_THYROID_CANCER_PAX8_PPARG_UP	LUI_THYROID_CANCER_PAX8_PPARG_UP	40	0.607102	1.73825	0.00150376	0.0786042	3381	tags=45%, list=18%, signal=37%	CCND1/ARHGAP1/CLASP1/SECISBP2L/EPOR/RUBCN/TPM2/GABBR2/EVPL/LASP1/TNFRSF10B/DDR1/USP6/SERPINA1/ZC3H14/FSCN1/APLP2/IL1R1
FIGUEROA_AML_METHYLATION_CLUSTER_1_DN	FIGUEROA_AML_METHYLATION_CLUSTER_1_DN	FIGUEROA_AML_METHYLATION_CLUSTER_1_DN	39	0.606508	1.72527	0.00149701	0.0786042	3151	tags=33%, list=16%, signal=28%	AHNAK/AHNAK2/LHFPL2/PRF1/PCNA/CD68/SLC25A42/TSC1/NQO2/MTMR11/CDC123/RUFY1/PPARD
GUENTHER_GROWTH_SPHERICAL_VS_ADHERENT_DN	GUENTHER_GROWTH_SPHERICAL_VS_ADHERENT_DN	GUENTHER_GROWTH_SPHERICAL_VS_ADHERENT_DN	24	0.603915	1.55402	0.0178282	0.190235	942	tags=25%, list=5%, signal=24%	NRP1/PRKCD/CAV1/PLAUR/CD59/MVP
SIMBULAN_PARP1_TARGETS_UP	SIMBULAN_PARP1_TARGETS_UP	SIMBULAN_PARP1_TARGETS_UP	27	0.602235	1.58054	0.0158479	0.17832	3102	tags=41%, list=16%, signal=34%	CCND1/COL4A5/TIMP2/CAV1/TINAGL1/IGFBP6/S100A6/CCND2/CDKN1A/CTTN/ANXA3
KEGG_DORSO_VENTRAL_AXIS_FORMATION	KEGG_DORSO_VENTRAL_AXIS_FORMATION	KEGG_DORSO_VENTRAL_AXIS_FORMATION	23	0.601899	1.53347	0.0226904	0.212281	1273	tags=30%, list=7%, signal=28%	NOTCH2/ETS2/KRAS/ETS1/SOS1/EGFR/NOTCH1
OUYANG_PROSTATE_CANCER_PROGRESSION_UP	OUYANG_PROSTATE_CANCER_PROGRESSION_UP	OUYANG_PROSTATE_CANCER_PROGRESSION_UP	19	-0.600175	-1.59993	0.0228426	0.212281	1474	tags=37%, list=8%, signal=34%	CDC42/JAK1/JUN/AVPI1/STAT1/DUSP16/FOS
REACTOME_RAF_INDEPENDENT_MAPK1_3_ACTIVATION	REACTOME_RAF_INDEPENDENT_MAPK1_3_ACTIVATION	REACTOME_RAF_INDEPENDENT_MAPK1_3_ACTIVATION	23	-0.602645	-1.66913	0.012987	0.1632	2263	tags=35%, list=12%, signal=31%	IL6ST/DUSP7/DUSP8/JAK1/CDK1/DUSP10/DUSP1/DUSP16
CHIANG_LIVER_CANCER_SUBCLASS_INTERFERON_UP	CHIANG_LIVER_CANCER_SUBCLASS_INTERFERON_UP	CHIANG_LIVER_CANCER_SUBCLASS_INTERFERON_UP	24	-0.608516	-1.69288	0.012987	0.1632	3875	tags=46%, list=20%, signal=37%	IFI27/TDO2/NNMT/GPR65/SLC12A2/SLC38A4/MOXD1/ISG15/IFI6/GOT1/STAT1
REACTOME_NOREPINEPHRINE_NEUROTRANSMITTER_RELEASE_CYCLE	REACTOME_NOREPINEPHRINE_NEUROTRANSMITTER_RELEASE_CYCLE	REACTOME_NOREPINEPHRINE_NEUROTRANSMITTER_RELEASE_CYCLE	18	-0.608545	-1.60427	0.0301508	0.226376	753	tags=17%, list=4%, signal=16%	MAOA/PPFIA1/RAB3A
FERRARI_RESPONSE_TO_FENRETINIDE_UP	FERRARI_RESPONSE_TO_FENRETINIDE_UP	FERRARI_RESPONSE_TO_FENRETINIDE_UP	20	-0.609522	-1.64821	0.0182292	0.191544	24	tags=25%, list=0%, signal=25%	SELE/PTGS2/ATF3/DDIT3/HERPUD1
EINAV_INTERFERON_SIGNATURE_IN_CANCER	EINAV_INTERFERON_SIGNATURE_IN_CANCER	EINAV_INTERFERON_SIGNATURE_IN_CANCER	27	-0.60957	-1.74895	0.00808625	0.136367	1163	tags=30%, list=6%, signal=28%	OAS2/EIF2AK2/TGIF1/ISG15/IFI6/UBE2L6/SP110/STAT1
SCHMIDT_POR_TARGETS_IN_LIMB_BUD_UP	SCHMIDT_POR_TARGETS_IN_LIMB_BUD_UP	SCHMIDT_POR_TARGETS_IN_LIMB_BUD_UP	25	-0.610519	-1.72609	0.00777202	0.136367	1575	tags=32%, list=8%, signal=29%	CYP26A1/SC5D/FDFT1/SQLE/SREBF2/STARD4/INSIG1/MSMO1
AMIT_EGF_RESPONSE_40_HELA	AMIT_EGF_RESPONSE_40_HELA	AMIT_EGF_RESPONSE_40_HELA	41	-0.620241	-1.98231	0.00299401	0.0902459	916	tags=34%, list=5%, signal=33%	UBE4B/JUNB/JUN/ID1/ZFP36/IER3/DUSP1/MBNL2/CBX4/PPP1R15A/PTGS2/ATF3/HES1/NR4A1
DAZARD_UV_RESPONSE_CLUSTER_G4	DAZARD_UV_RESPONSE_CLUSTER_G4	DAZARD_UV_RESPONSE_CLUSTER_G4	17	-0.630435	-1.64205	0.025	0.21463	1186	tags=35%, list=6%, signal=33%	PFN1/XBP1/ZFP36/DUSP1/CDKN1C/GADD45B
KEGG_STEROID_BIOSYNTHESIS	KEGG_STEROID_BIOSYNTHESIS	KEGG_STEROID_BIOSYNTHESIS	14	-0.634588	-1.5565	0.0444444	0.27352	3010	tags=57%, list=16%, signal=48%	EBP/NSDHL/CYP51A1/LIPA/SC5D/FDFT1/SQLE/MSMO1
AMIT_DELAYED_EARLY_GENES	AMIT_DELAYED_EARLY_GENES	AMIT_DELAYED_EARLY_GENES	18	-0.636177	-1.67712	0.0150754	0.172926	1443	tags=39%, list=8%, signal=36%	KLF10/JUNB/ID1/ZFP36/MAFF/ATF3/HES1
REACTOME_FOXO_MEDIATED_TRANSCRIPTION_OF_CELL_DEATH_GENES	REACTOME_FOXO_MEDIATED_TRANSCRIPTION_OF_CELL_DEATH_GENES	REACTOME_FOXO_MEDIATED_TRANSCRIPTION_OF_CELL_DEATH_GENES	15	-0.64134	-1.60817	0.037594	0.254719	2397	tags=40%, list=12%, signal=35%	BCL2L11/NFYA/BCL6/FOXO4/CITED2/DDIT3
BROWNE_HCMV_INFECTION_2HR_UP	BROWNE_HCMV_INFECTION_2HR_UP	BROWNE_HCMV_INFECTION_2HR_UP	35	-0.642939	-1.98066	0.00289017	0.0884066	95	tags=37%, list=0%, signal=37%	SNED1/EGR1/RARRES2/MAP3K8/CHRDL1/NFKBIA/ECPAS/NR4A3/NR4A2/ATF3/CXCL8/FOS/NR4A1
REACTOME_REGULATION_OF_TP53_ACTIVITY_THROUGH_METHYLATION	REACTOME_REGULATION_OF_TP53_ACTIVITY_THROUGH_METHYLATION	REACTOME_REGULATION_OF_TP53_ACTIVITY_THROUGH_METHYLATION	17	-0.648994	-1.69039	0.015	0.172926	2291	tags=41%, list=12%, signal=36%	ATM/RPS27A/KMT5A/MDM2/SMYD2/UBC/JMY
ABE_VEGFA_TARGETS_2HR	ABE_VEGFA_TARGETS_2HR	ABE_VEGFA_TARGETS_2HR	32	-0.649441	-1.96954	0.00555556	0.119584	1303	tags=31%, list=7%, signal=29%	AURKC/XPO7/BPI/PLPP3/EIF1/HBEGF/PTGS2/RAPGEF1/HERPUD1/NR4A1
UZONYI_RESPONSE_TO_LEUKOTRIENE_AND_THROMBIN	UZONYI_RESPONSE_TO_LEUKOTRIENE_AND_THROMBIN	UZONYI_RESPONSE_TO_LEUKOTRIENE_AND_THROMBIN	35	-0.651145	-2.00594	0.00289017	0.0884066	832	tags=40%, list=4%, signal=38%	KLF4/PDK4/CITED2/ZFP36/DUSP1/SIK1/HBEGF/NR4A3/NR4A2/GEM/PTGS2/ATF3/CXCL8/NR4A1
TIAN_BHLHA15_TARGETS	TIAN_BHLHA15_TARGETS	TIAN_BHLHA15_TARGETS	14	-0.652967	-1.60158	0.037037	0.253638	313	tags=21%, list=2%, signal=21%	MAP2K5/SERPINI1/ARRDC3
BIOCARTA_IL17_PATHWAY	BIOCARTA_IL17_PATHWAY	BIOCARTA_IL17_PATHWAY	15	-0.653821	-1.63947	0.0325815	0.234807	158	tags=27%, list=1%, signal=26%	CD3G/IL3/CD34/CXCL8
BIOCARTA_INFLAM_PATHWAY	BIOCARTA_INFLAM_PATHWAY	BIOCARTA_INFLAM_PATHWAY	27	-0.654679	-1.87838	0.00269542	0.088118	842	tags=19%, list=4%, signal=18%	HLA-DRA/HLA-DRB4/IL3/IL15/CXCL8
BIOCARTA_CYTOKINE_PATHWAY	BIOCARTA_CYTOKINE_PATHWAY	BIOCARTA_CYTOKINE_PATHWAY	18	-0.656235	-1.73	0.00251256	0.088118	158	tags=22%, list=1%, signal=22%	IL5/IL3/IL15/CXCL8
STEIN_ESTROGEN_RESPONSE_NOT_VIA_ESRRA	STEIN_ESTROGEN_RESPONSE_NOT_VIA_ESRRA	STEIN_ESTROGEN_RESPONSE_NOT_VIA_ESRRA	18	-0.656336	-1.73026	0.00251256	0.088118	185	tags=17%, list=1%, signal=17%	TPBG/SIAH2/TIPARP
DORN_ADENOVIRUS_INFECTION_48HR_UP	DORN_ADENOVIRUS_INFECTION_48HR_UP	DORN_ADENOVIRUS_INFECTION_48HR_UP	12	-0.657082	-1.55647	0.0475059	0.283714	1238	tags=33%, list=6%, signal=31%	BACE2/FUBP3/ATF4/TSC22D3
GROSS_HYPOXIA_VIA_ELK3_ONLY_UP	GROSS_HYPOXIA_VIA_ELK3_ONLY_UP	GROSS_HYPOXIA_VIA_ELK3_ONLY_UP	31	-0.658436	-1.95952	0.00277778	0.0884066	1431	tags=32%, list=7%, signal=30%	EGLN1/DHRS9/AKAP12/PDLIM5/GADD45A/ATF4/ADM/NFIL3/PPP1R15A/HERPUD1
CHANG_POU5F1_TARGETS_UP	CHANG_POU5F1_TARGETS_UP	CHANG_POU5F1_TARGETS_UP	14	-0.662915	-1.62598	0.0296296	0.225331	4460	tags=57%, list=23%, signal=44%	SMARCA4/SLIT3/KAT2B/FN1/COL5A1/ABI1/MMP13/ATAD2
PACHER_TARGETS_OF_IGF1_AND_IGF2_UP	PACHER_TARGETS_OF_IGF1_AND_IGF2_UP	PACHER_TARGETS_OF_IGF1_AND_IGF2_UP	34	-0.663112	-2.02615	0.00287356	0.0884066	1986	tags=38%, list=10%, signal=34%	MID1/SDF2L1/SESN2/IFRD1/SLC3A2/DCLK1/GDF15/GADD45A/DNAJB9/PHGDH/ASNS/DDIT3/HERPUD1
REACTOME_PERK_REGULATES_GENE_EXPRESSION	REACTOME_PERK_REGULATES_GENE_EXPRESSION	REACTOME_PERK_REGULATES_GENE_EXPRESSION	29	-0.664114	-1.93939	0.00271003	0.088118	139	tags=38%, list=1%, signal=38%	EIF2S2/EXOSC9/EIF2AK3/NFYA/HSPA5/ATF4/ASNS/ATF3/CXCL8/DDIT3/HERPUD1
PID_TCR_CALCIUM_PATHWAY	PID_TCR_CALCIUM_PATHWAY	PID_TCR_CALCIUM_PATHWAY	28	-0.664132	-1.9291	0.0026738	0.088118	820	tags=21%, list=4%, signal=21%	JUNB/JUN/NFATC1/IL3/PTGS2/FOS
NAGASHIMA_EGF_SIGNALING_UP	NAGASHIMA_EGF_SIGNALING_UP	NAGASHIMA_EGF_SIGNALING_UP	53	-0.666325	-2.2521	0.00320513	0.0913769	862	tags=38%, list=4%, signal=36%	NAP1L1/JUNB/JUN/ID1/ZFP36/IER3/DUSP1/SIK1/HBEGF/MAFF/NR4A3/TIPARP/FOSB/DNAJB1/NR4A2/GEM/ATF3/FOS/HES1/NR4A1
CHO_NR4A1_TARGETS	CHO_NR4A1_TARGETS	CHO_NR4A1_TARGETS	30	-0.671166	-1.98276	0.00277778	0.0884066	117	tags=30%, list=1%, signal=30%	HOXD10/SLC3A2/ATF4/INSIG1/ASNS/PPP1R15A/ATF3/DDIT3/HERPUD1
BIOCARTA_PRION_PATHWAY	BIOCARTA_PRION_PATHWAY	BIOCARTA_PRION_PATHWAY	11	-0.67346	-1.56746	0.0447059	0.273905	1670	tags=27%, list=9%, signal=25%	BCL2/HSPA5/DNAJB1
REACTOME_ATF4_ACTIVATES_GENES_IN_RESPONSE_TO_ENDOPLASMIC_RETICULUM_STRESS	REACTOME_ATF4_ACTIVATES_GENES_IN_RESPONSE_TO_ENDOPLASMIC_RETICULUM_STRESS	REACTOME_ATF4_ACTIVATES_GENES_IN_RESPONSE_TO_ENDOPLASMIC_RETICULUM_STRESS	25	-0.677808	-1.91634	0.00259067	0.088118	117	tags=24%, list=1%, signal=24%	ATF4/ASNS/ATF3/CXCL8/DDIT3/HERPUD1
PLASARI_TGFB1_TARGETS_1HR_UP	PLASARI_TGFB1_TARGETS_1HR_UP	PLASARI_TGFB1_TARGETS_1HR_UP	33	-0.682738	-2.08756	0.00280899	0.0884066	820	tags=42%, list=4%, signal=41%	RASL11B/EGR2/SNAI1/KLF10/JUNB/ID1/IER3/HBEGF/GADD45B/ID2/CSRNP1/PTGS2/HES1/NR4A1
BIOCARTA_BLYMPHOCYTE_PATHWAY	BIOCARTA_BLYMPHOCYTE_PATHWAY	BIOCARTA_BLYMPHOCYTE_PATHWAY	13	-0.687578	-1.65684	0.0242718	0.212867	2645	tags=46%, list=14%, signal=40%	CR1/CD40/ITGB2/HLA-DRA/HLA-DRB4/CR2
WANG_NEOPLASTIC_TRANSFORMATION_BY_CCND1_MYC	WANG_NEOPLASTIC_TRANSFORMATION_BY_CCND1_MYC	WANG_NEOPLASTIC_TRANSFORMATION_BY_CCND1_MYC	19	-0.689502	-1.83805	0.00253807	0.088118	615	tags=32%, list=3%, signal=31%	ARHGAP24/ARHGAP6/TRIB3/TSPAN7/ATF3/DDIT3
HEDVAT_ELF4_TARGETS_UP	HEDVAT_ELF4_TARGETS_UP	HEDVAT_ELF4_TARGETS_UP	12	-0.6951	-1.64653	0.0261283	0.217103	1035	tags=33%, list=5%, signal=32%	CA2/TAF7/ABCB1/CXCL8
BIOCARTA_DREAM_PATHWAY	BIOCARTA_DREAM_PATHWAY	BIOCARTA_DREAM_PATHWAY	13	-0.697621	-1.68103	0.0218447	0.210273	664	tags=31%, list=3%, signal=30%	JUN/PRKAR2A/PRKACB/FOS
KRIGE_AMINO_ACID_DEPRIVATION	KRIGE_AMINO_ACID_DEPRIVATION	KRIGE_AMINO_ACID_DEPRIVATION	24	-0.698158	-1.94226	0.0025974	0.088118	508	tags=42%, list=3%, signal=41%	CCNG2/GADD45A/TRIB3/CHAC1/ASNS/PSAT1/PPP1R15A/ATF3/CXCL8/DDIT3
SESTO_RESPONSE_TO_UV_C3	SESTO_RESPONSE_TO_UV_C3	SESTO_RESPONSE_TO_UV_C3	17	-0.698302	-1.81881	0.0025	0.088118	530	tags=47%, list=3%, signal=46%	BRD2/IER3/DUSP1/HBEGF/HSPA1B/PTGS2/ATF3/CXCL8
WEST_ADRENOCORTICAL_TUMOR_MARKERS_DN	WEST_ADRENOCORTICAL_TUMOR_MARKERS_DN	WEST_ADRENOCORTICAL_TUMOR_MARKERS_DN	18	-0.706221	-1.86177	0.00251256	0.088118	2831	tags=33%, list=15%, signal=28%	RARRES2/LSP1/GAS1/FBLN1/FOSB/NR4A2
REACTOME_DISEASES_OF_DNA_REPAIR	REACTOME_DISEASES_OF_DNA_REPAIR	REACTOME_DISEASES_OF_DNA_REPAIR	10	-0.707889	-1.62066	0.025522	0.214775	1197	tags=60%, list=6%, signal=56%	NEIL3/PMS2/MUTYH/MSH2/NEIL1/OGG1
AMIT_EGF_RESPONSE_40_MCF10A	AMIT_EGF_RESPONSE_40_MCF10A	AMIT_EGF_RESPONSE_40_MCF10A	15	-0.708643	-1.77693	0.00250627	0.088118	664	tags=33%, list=3%, signal=32%	JUN/ZFP36/NDUFB6/ADM/FOS
BIOCARTA_RHODOPSIN_PATHWAY	BIOCARTA_RHODOPSIN_PATHWAY	BIOCARTA_RHODOPSIN_PATHWAY	10	-0.713908	-1.63444	0.0208817	0.203989	2287	tags=40%, list=12%, signal=35%	SLC25A18/RCVRN/SLC25A22/PDE6A
MARIADASON_RESPONSE_TO_CURCUMIN_SULINDAC_5	MARIADASON_RESPONSE_TO_CURCUMIN_SULINDAC_5	MARIADASON_RESPONSE_TO_CURCUMIN_SULINDAC_5	20	-0.715299	-1.93424	0.00260417	0.088118	1496	tags=35%, list=8%, signal=32%	ADK/BTF3/XPOT/XBP1/ME1/ATF4/CKS1B
DAZARD_UV_RESPONSE_CLUSTER_G2	DAZARD_UV_RESPONSE_CLUSTER_G2	DAZARD_UV_RESPONSE_CLUSTER_G2	24	-0.720877	-2.00546	0.0025974	0.088118	973	tags=38%, list=5%, signal=36%	BAMBI/JUNB/CITED2/GADD45A/CLDN4/IER3/ATF4/ATF3/CXCL8
REACTOME_ATF6_ATF6_ALPHA_ACTIVATES_CHAPERONES	REACTOME_ATF6_ATF6_ALPHA_ACTIVATES_CHAPERONES	REACTOME_ATF6_ATF6_ALPHA_ACTIVATES_CHAPERONES	11	-0.724326	-1.68585	0.0141176	0.167919	425	tags=45%, list=2%, signal=44%	NFYA/XBP1/HSPA5/ATF4/DDIT3
SUH_COEXPRESSED_WITH_ID1_AND_ID2_UP	SUH_COEXPRESSED_WITH_ID1_AND_ID2_UP	SUH_COEXPRESSED_WITH_ID1_AND_ID2_UP	18	-0.727368	-1.91752	0.00251256	0.088118	1522	tags=50%, list=8%, signal=46%	SKIL/MYO1F/ID1/UNC5A/GABARAPL1/GADD45B/ID2/DNAJB1/DDIT3
VANDESLUIS_COMMD1_TARGETS_GROUP_4_DN	VANDESLUIS_COMMD1_TARGETS_GROUP_4_DN	VANDESLUIS_COMMD1_TARGETS_GROUP_4_DN	16	-0.731637	-1.88692	0.00246914	0.088118	950	tags=31%, list=5%, signal=30%	LHX9/OXCT1/UNC5A/HOXD11/TMEM98
BIOCARTA_EOSINOPHILS_PATHWAY	BIOCARTA_EOSINOPHILS_PATHWAY	BIOCARTA_EOSINOPHILS_PATHWAY	11	-0.732423	-1.7047	0.0117647	0.159285	2551	tags=36%, list=13%, signal=32%	IL5/HLA-DRA/HLA-DRB4/IL3
YIH_RESPONSE_TO_ARSENITE_C2	YIH_RESPONSE_TO_ARSENITE_C2	YIH_RESPONSE_TO_ARSENITE_C2	13	-0.7345	-1.7699	0.0121359	0.162711	2598	tags=46%, list=14%, signal=40%	PPP1CB/CAST/SP3/GADD45A/TCF12/ATF2
IIZUKA_LIVER_CANCER_PROGRESSION_G1_G2_UP	IIZUKA_LIVER_CANCER_PROGRESSION_G1_G2_UP	IIZUKA_LIVER_CANCER_PROGRESSION_G1_G2_UP	12	-0.735363	-1.7419	0.0118765	0.159751	1163	tags=50%, list=6%, signal=47%	OAS2/PDLIM5/PSME1/GABARAPL1/UBE2L6/STAT1
GESERICK_TERT_TARGETS_DN	GESERICK_TERT_TARGETS_DN	GESERICK_TERT_TARGETS_DN	21	-0.740196	-2.02306	0.0025641	0.088118	832	tags=57%, list=4%, signal=55%	KLF10/KLF4/JUNB/ZFP36/KLF9/IER3/HBEGF/SIAH2/GADD45B/FOSB/NFIL3/NR4A1
PEDERSEN_METASTASIS_BY_ERBB2_ISOFORM_5	PEDERSEN_METASTASIS_BY_ERBB2_ISOFORM_5	PEDERSEN_METASTASIS_BY_ERBB2_ISOFORM_5	10	-0.743793	-1.70286	0.00928074	0.143538	35	tags=40%, list=0%, signal=40%	PTGER4/NR4A2/FOS/NR4A1
TIAN_TNF_SIGNALING_NOT_VIA_NFKB	TIAN_TNF_SIGNALING_NOT_VIA_NFKB	TIAN_TNF_SIGNALING_NOT_VIA_NFKB	22	-0.744119	-2.05657	0.0025641	0.088118	1443	tags=41%, list=8%, signal=38%	KLF10/JUNB/JUN/IER3/INSIG1/TIPARP/FOSB/PPP1R15A/NR4A1
GRAHAM_CML_QUIESCENT_VS_NORMAL_DIVIDING_DN	GRAHAM_CML_QUIESCENT_VS_NORMAL_DIVIDING_DN	GRAHAM_CML_QUIESCENT_VS_NORMAL_DIVIDING_DN	11	-0.759586	-1.76792	0.00941176	0.144519	738	tags=45%, list=4%, signal=44%	SPINK2/HLA-DRB4/AIF1/SORL1/C3orf14
REACTOME_ACTIVATION_OF_THE_AP_1_FAMILY_OF_TRANSCRIPTION_FACTORS	REACTOME_ACTIVATION_OF_THE_AP_1_FAMILY_OF_TRANSCRIPTION_FACTORS	REACTOME_ACTIVATION_OF_THE_AP_1_FAMILY_OF_TRANSCRIPTION_FACTORS	10	-0.761632	-1.7437	0.00928074	0.143538	664	tags=40%, list=3%, signal=39%	JUN/MAPK9/ATF2/FOS
BARRIER_CANCER_RELAPSE_TUMOR_SAMPLE_UP	BARRIER_CANCER_RELAPSE_TUMOR_SAMPLE_UP	BARRIER_CANCER_RELAPSE_TUMOR_SAMPLE_UP	13	-0.763638	-1.84012	0.00485437	0.109541	1931	tags=46%, list=10%, signal=42%	MED21/DCTN3/CKS1B/HSPA13/DNAJB9/CXCL8
PHESSE_TARGETS_OF_APC_AND_MBD2_DN	PHESSE_TARGETS_OF_APC_AND_MBD2_DN	PHESSE_TARGETS_OF_APC_AND_MBD2_DN	10	-0.764634	-1.75057	0.00696056	0.129475	378	tags=30%, list=2%, signal=29%	MBD2/DTNA/ATP10A
YAO_TEMPORAL_RESPONSE_TO_PROGESTERONE_CLUSTER_3	YAO_TEMPORAL_RESPONSE_TO_PROGESTERONE_CLUSTER_3	YAO_TEMPORAL_RESPONSE_TO_PROGESTERONE_CLUSTER_3	12	-0.785335	-1.86027	0.00475059	0.108642	2329	tags=42%, list=12%, signal=37%	RABGAP1L/NFKBIA/CA2/PTEN/GADD45A
NOJIMA_SFRP2_TARGETS_UP	NOJIMA_SFRP2_TARGETS_UP	NOJIMA_SFRP2_TARGETS_UP	27	-0.790111	-2.26695	0.00269542	0.088118	789	tags=44%, list=4%, signal=43%	DEDD2/JUN/CLK1/GADD45A/TNFRSF10D/TRIB3/HSPA5/BTG1/NR4A3/GADD45B/HSPA1B/PPP1R15A
AMIT_SERUM_RESPONSE_40_MCF10A	AMIT_SERUM_RESPONSE_40_MCF10A	AMIT_SERUM_RESPONSE_40_MCF10A	27	-0.798125	-2.28994	0.00269542	0.088118	737	tags=44%, list=4%, signal=43%	NAMPT/JUN/CITED2/CLIC4/ZFP36/DUSP1/ADM/FOSB/NR4A2/ATF3/FOS/NR4A1
DAZARD_UV_RESPONSE_CLUSTER_G28	DAZARD_UV_RESPONSE_CLUSTER_G28	DAZARD_UV_RESPONSE_CLUSTER_G28	15	-0.838686	-2.10302	0.00250627	0.088118	640	tags=47%, list=3%, signal=45%	CITED2/GADD45A/IER3/GADD45B/PTGS2/ATF3/CXCL8
REACTOME_RESPONSE_OF_EIF2AK1_HRI_TO_HEME_DEFICIENCY	REACTOME_RESPONSE_OF_EIF2AK1_HRI_TO_HEME_DEFICIENCY	REACTOME_RESPONSE_OF_EIF2AK1_HRI_TO_HEME_DEFICIENCY	14	-0.854693	-2.09637	0.00246914	0.088118	250	tags=50%, list=1%, signal=49%	TRIB3/ATF4/CHAC1/ASNS/PPP1R15A/ATF3/DDIT3
Pathways list sorted for increasing enrichment score values (abs es ≥0.60, P-value <0.05) in the siTRAP1 0.5% O2 vs. siNEG 0.5% O2 experimental condition.

## Sheet: P_siNEG 05%O2 vs. siNEG 20%O2
Table SIII. Continued.
row.names	ID	Description	setSize	enrichmentScore	NES	P-value	/Q-value	rank	leading_edge	core_enrichment
FUNG_IL2_SIGNALING_1	FUNG_IL2_SIGNALING_1	FUNG_IL2_SIGNALING_1	10	-0.853539	-1.66699	0.00343643	0.0246978	638	tags=50%, list=3%, signal=48%	NOLC1/NOP16/DKC1/NOP56/MAT2A
ROETH_TERT_TARGETS_UP	ROETH_TERT_TARGETS_UP	ROETH_TERT_TARGETS_UP	12	-0.820321	-1.67595	0.00167504	0.0246978	2240	tags=42%, list=12%, signal=37%	SLC12A8/MX1/OASL/NRIP1/IFIT1
FARMER_BREAST_CANCER_CLUSTER_6	FARMER_BREAST_CANCER_CLUSTER_6	FARMER_BREAST_CANCER_CLUSTER_6	14	-0.818659	-1.74143	0.00165837	0.0246978	1396	tags=43%, list=7%, signal=40%	RBM47/KIAA0232/GPD1L/REEP5/RHOB/MLPH
MULLIGAN_NTF3_SIGNALING_VIA_INSR_AND_IGF1R_UP	MULLIGAN_NTF3_SIGNALING_VIA_INSR_AND_IGF1R_UP	MULLIGAN_NTF3_SIGNALING_VIA_INSR_AND_IGF1R_UP	21	-0.803079	-1.85682	0.00157729	0.0246978	2259	tags=62%, list=12%, signal=55%	TMEM97/USP10/DDX21/SRXN1/GNL3/GMPPB/WDR77/HSPA4/MRPL20/EBNA1BP2/NOP56/RCL1/SRSF2
REACTOME_UNWINDING_OF_DNA	REACTOME_UNWINDING_OF_DNA	REACTOME_UNWINDING_OF_DNA	12	-0.798139	-1.63063	0.00502513	0.0270037	3467	tags=83%, list=18%, signal=68%	MCM8/CDC45/MCM5/MCM4/GINS4/MCM7/GINS2/MCM3/MCM6/GINS3
RICKMAN_TUMOR_DIFFERENTIATED_MODERATELY_VS_POORLY_DN	RICKMAN_TUMOR_DIFFERENTIATED_MODERATELY_VS_POORLY_DN	RICKMAN_TUMOR_DIFFERENTIATED_MODERATELY_VS_POORLY_DN	15	-0.792825	-1.71102	0.00325733	0.0246978	2262	tags=53%, list=12%, signal=47%	CENPF/LUC7L3/CSPP1/IPO9/MCM3/TMEM70/SRSF3/SRSF1
GARGALOVIC_RESPONSE_TO_OXIDIZED_PHOSPHOLIPIDS_MAGENTA_DN	GARGALOVIC_RESPONSE_TO_OXIDIZED_PHOSPHOLIPIDS_MAGENTA_DN	GARGALOVIC_RESPONSE_TO_OXIDIZED_PHOSPHOLIPIDS_MAGENTA_DN	11	-0.785522	-1.56261	0.00686106	0.0306676	3445	tags=82%, list=18%, signal=67%	RANBP6/RSBN1L/DIDO1/DBR1/IRAK1BP1/IMP3/KBTBD6/GPAM/AGGF1
ELVIDGE_HYPOXIA_BY_DMOG_DN	ELVIDGE_HYPOXIA_BY_DMOG_DN	ELVIDGE_HYPOXIA_BY_DMOG_DN	55	-0.775901	-2.14122	0.00149254	0.0246978	2005	tags=49%, list=10%, signal=44%	ADORA1/SLC29A1/TOR3A/ACOT7/SPAG1/NUP98/POLR3K/RPP25/TIGAR/ZMPSTE24/WDR77/HSPA4/PYCR3/ATP6V0A2/ODC1/RPP40/SLC35C1/SRSF1/PSME3/RIOX1/CEBPA/SLC5A6/CTPS1/URB2/CALM1/PUS1/DOLK
KALMA_E2F1_TARGETS	KALMA_E2F1_TARGETS	KALMA_E2F1_TARGETS	11	-0.773226	-1.53816	0.00857633	0.0328017	1688	tags=55%, list=9%, signal=50%	RFC4/RPA2/POLA2/PCNA/MCM6/FEN1
SEMBA_FHIT_TARGETS_DN	SEMBA_FHIT_TARGETS_DN	SEMBA_FHIT_TARGETS_DN	10	-0.771285	-1.50635	0.0154639	0.0514788	2553	tags=60%, list=13%, signal=52%	DTYMK/CENPF/ECT2/PLK4/ASPM/ZNF252P
CAFFAREL_RESPONSE_TO_THC_8HR_3_DN	CAFFAREL_RESPONSE_TO_THC_8HR_3_DN	CAFFAREL_RESPONSE_TO_THC_8HR_3_DN	10	-0.759611	-1.48355	0.0206186	0.0627569	2498	tags=60%, list=13%, signal=52%	PSMD1/PRPS1/RANGAP1/ACTR1A/POLA2/EIF3B
REACTOME_TETRAHYDROBIOPTERIN_BH4_SYNTHESIS_RECYCLING_SALVAGE_AND_REGULATION	REACTOME_TETRAHYDROBIOPTERIN_BH4_SYNTHESIS_RECYCLING_SALVAGE_AND_REGULATION	REACTOME_TETRAHYDROBIOPTERIN_BH4_SYNTHESIS_RECYCLING_SALVAGE_AND_REGULATION	10	-0.754193	-1.47297	0.0206186	0.0627569	3127	tags=50%, list=16%, signal=42%	AKT1/HSP90AA1/DHFR/SPR/CALM1
BIOCARTA_AHSP_PATHWAY	BIOCARTA_AHSP_PATHWAY	BIOCARTA_AHSP_PATHWAY	10	-0.754098	-1.47278	0.0206186	0.0627569	3790	tags=60%, list=20%, signal=48%	FECH/ALAS1/UROD/UROS/CPOX/HMBS
REACTOME_RETINOID_CYCLE_DISEASE_EVENTS	REACTOME_RETINOID_CYCLE_DISEASE_EVENTS	REACTOME_RETINOID_CYCLE_DISEASE_EVENTS	12	-0.751436	-1.53522	0.0184255	0.0585994	1656	tags=25%, list=9%, signal=23%	RLBP1/LRAT/NAPEPLD
XU_RESPONSE_TO_TRETINOIN_AND_NSC682994_DN	XU_RESPONSE_TO_TRETINOIN_AND_NSC682994_DN	XU_RESPONSE_TO_TRETINOIN_AND_NSC682994_DN	14	-0.750803	-1.59709	0.00497512	0.0270037	1844	tags=57%, list=10%, signal=52%	GRB10/MYC/CSE1L/DDX18/PPM1G/ABCE1/EIF3B/NAE1
SCHLESINGER_METHYLATED_IN_COLON_CANCER	SCHLESINGER_METHYLATED_IN_COLON_CANCER	SCHLESINGER_METHYLATED_IN_COLON_CANCER	10	-0.750795	-1.46633	0.0206186	0.0627569	1324	tags=20%, list=7%, signal=19%	DKK1/CDX2
REACTOME_RRNA_MODIFICATION_IN_THE_NUCLEUS_AND_CYTOSOL	REACTOME_RRNA_MODIFICATION_IN_THE_NUCLEUS_AND_CYTOSOL	REACTOME_RRNA_MODIFICATION_IN_THE_NUCLEUS_AND_CYTOSOL	57	-0.747896	-2.07893	0.00147929	0.0246978	3300	tags=68%, list=17%, signal=57%	KRR1/DCAF13/NOL6/WDR43/NAT10/TBL3/HEATR1/NOC4L/NOP10/WDR46/UTP11/RRP9/PWP2/WDR75/TSR3/UTP14C/DHX37/UTP6/SNU13/BMS1/UTP3/NOP58/EMG1/UTP14A/IMP4/GAR1/UTP15/MPHOSPH10/UTP4/IMP3/DKC1/DDX52/RRP7A/NOL11/RRP36/NOP56/NOP2/RCL1/DIMT1
REACTOME_SLBP_DEPENDENT_PROCESSING_OF_REPLICATION_DEPENDENT_HISTONE_PRE_MRNAS	REACTOME_SLBP_DEPENDENT_PROCESSING_OF_REPLICATION_DEPENDENT_HISTONE_PRE_MRNAS	REACTOME_SLBP_DEPENDENT_PROCESSING_OF_REPLICATION_DEPENDENT_HISTONE_PRE_MRNAS	10	-0.747418	-1.45973	0.0223368	0.0662356	3755	tags=70%, list=20%, signal=56%	NCBP1/SNRPF/LSM10/SNRPG/SLBP/SNRPB/ZNF473
ELVIDGE_HIF1A_TARGETS_UP	ELVIDGE_HIF1A_TARGETS_UP	ELVIDGE_HIF1A_TARGETS_UP	59	-0.746197	-2.08608	0.00147059	0.0246978	2432	tags=54%, list=13%, signal=48%	STX3/MRPS12/LARS2/FASTKD5/SLC29A1/TOR3A/HSPH1/SLC35B1/SPAG1/POLR3K/GLYR1/RPP25/ABCF2/HHEX/WDR77/SLC7A6/HSPA4/RAB35/ATP6V0A2/RPP40/RRP15/SLC35C1/PSME3/SEC23IP/RIOX1/SLC5A6/CTPS1/TMEM33/URB2/RRS1/PSEN2/DOLK
REACTOME_MITOCHONDRIAL_IRON_SULFUR_CLUSTER_BIOGENESIS	REACTOME_MITOCHONDRIAL_IRON_SULFUR_CLUSTER_BIOGENESIS	REACTOME_MITOCHONDRIAL_IRON_SULFUR_CLUSTER_BIOGENESIS	11	-0.745057	-1.48212	0.0222985	0.0661808	1862	tags=55%, list=10%, signal=49%	ISCU/NFS1/FDX2/ISCA2/GLRX5/SLC25A28
REACTOME_ACTIVATION_OF_THE_PRE_REPLICATIVE_COMPLEX	REACTOME_ACTIVATION_OF_THE_PRE_REPLICATIVE_COMPLEX	REACTOME_ACTIVATION_OF_THE_PRE_REPLICATIVE_COMPLEX	32	-0.744206	-1.86095	0.00156986	0.0246978	2512	tags=62%, list=13%, signal=54%	MCM8/CDC45/RPA1/RPA3/ORC4/MCM5/MCM4/MCM10/MCM7/RPA2/GMNN/MCM3/ORC2/ORC6/POLA2/MCM6/ORC5/POLE3/CDC7/POLE2
REACTOME_ASPARTATE_AND_ASPARAGINE_METABOLISM	REACTOME_ASPARTATE_AND_ASPARAGINE_METABOLISM	REACTOME_ASPARTATE_AND_ASPARAGINE_METABOLISM	10	-0.740442	-1.44611	0.0292096	0.0802051	4496	tags=60%, list=23%, signal=46%	SLC25A12/GOT1/GOT2/ASPG/ASNS/SLC25A13
BIOCARTA_SM_PATHWAY	BIOCARTA_SM_PATHWAY	BIOCARTA_SM_PATHWAY	13	-0.737876	-1.53232	0.0201342	0.0618984	4050	tags=77%, list=21%, signal=61%	SNRNP70/SNRPF/SNRPG/SNRPD1/SNRPB2/SNRPC/U2AF1/SNRPA1/SNRPB/SRSF2
ELVIDGE_HIF1A_AND_HIF2A_TARGETS_UP	ELVIDGE_HIF1A_AND_HIF2A_TARGETS_UP	ELVIDGE_HIF1A_AND_HIF2A_TARGETS_UP	34	-0.734764	-1.86529	0.0015456	0.0246978	1815	tags=74%, list=9%, signal=67%	AUNIP/GYG1/SRM/SOCS2/RRP12/CCDC86/CCND3/STX3/SLC29A1/TOR3A/HSPH1/SLC35B1/SPAG1/POLR3K/RPP25/ABCF2/WDR77/HSPA4/ATP6V0A2/RPP40/FLAD1/SLC35C1/RIOX1/SLC5A6/RRS1
REACTOME_SODIUM_CALCIUM_EXCHANGERS	REACTOME_SODIUM_CALCIUM_EXCHANGERS	REACTOME_SODIUM_CALCIUM_EXCHANGERS	11	-0.730262	-1.45269	0.0274443	0.0768749	608	tags=27%, list=3%, signal=26%	SLC8A2/SLC8B1/CALM1
REACTOME_CDC6_ASSOCIATION_WITH_THE_ORC_ORIGIN_COMPLEX	REACTOME_CDC6_ASSOCIATION_WITH_THE_ORC_ORIGIN_COMPLEX	REACTOME_CDC6_ASSOCIATION_WITH_THE_ORC_ORIGIN_COMPLEX	11	-0.727866	-1.44792	0.0291595	0.0801334	956	tags=64%, list=5%, signal=61%	MCM8/ORC4/E2F3/ORC2/ORC6/E2F2/ORC5
REACTOME_HEME_BIOSYNTHESIS	REACTOME_HEME_BIOSYNTHESIS	REACTOME_HEME_BIOSYNTHESIS	12	-0.72625	-1.48376	0.0268007	0.0757714	4091	tags=58%, list=21%, signal=46%	PPOX/FECH/ALAS1/UROD/UROS/CPOX/HMBS
GRASEMANN_RETINOBLASTOMA_WITH_6P_AMPLIFICATION	GRASEMANN_RETINOBLASTOMA_WITH_6P_AMPLIFICATION	GRASEMANN_RETINOBLASTOMA_WITH_6P_AMPLIFICATION	14	-0.726134	-1.54462	0.013267	0.0458095	1967	tags=50%, list=10%, signal=45%	TMX1/RAN/TDP2/ABCF1/E2F3/PRR3/POLR1C
REACTOME_METHYLATION	REACTOME_METHYLATION	REACTOME_METHYLATION	12	-0.725825	-1.48289	0.0268007	0.0757714	2808	tags=58%, list=15%, signal=50%	MTR/GSTO1/COMT/MTRR/MAT2B/N6AMT1/MAT2A
BIOCARTA_NPC_PATHWAY	BIOCARTA_NPC_PATHWAY	BIOCARTA_NPC_PATHWAY	11	-0.722738	-1.43772	0.0360206	0.0919502	2863	tags=64%, list=15%, signal=54%	RAN/KPNA2/RANGAP1/NUP214/RANBP2/NUP62/RCC1
KEGG_BASE_EXCISION_REPAIR	KEGG_BASE_EXCISION_REPAIR	KEGG_BASE_EXCISION_REPAIR	30	-0.717589	-1.76429	0.0015949	0.0246978	2715	tags=47%, list=14%, signal=40%	OGG1/POLD2/HMGB1/NEIL2/LIG3/NEIL3/PARP4/PCNA/UNG/FEN1/NTHL1/POLE3/POLE2/TDG
IIZUKA_LIVER_CANCER_PROGRESSION_L1_G1_DN	IIZUKA_LIVER_CANCER_PROGRESSION_L1_G1_DN	IIZUKA_LIVER_CANCER_PROGRESSION_L1_G1_DN	10	-0.717209	-1.40074	0.0498282	0.114035	3483	tags=60%, list=18%, signal=49%	ILF2/ATP6V1E1/TBCE/GOLGA3/CAMKK2/SNRPB
REACTOME_ACTIVATION_OF_ATR_IN_RESPONSE_TO_REPLICATION_STRESS	REACTOME_ACTIVATION_OF_ATR_IN_RESPONSE_TO_REPLICATION_STRESS	REACTOME_ACTIVATION_OF_ATR_IN_RESPONSE_TO_REPLICATION_STRESS	37	-0.716967	-1.83631	0.0015528	0.0246978	2512	tags=62%, list=13%, signal=54%	MCM8/CDC45/RPA1/RPA3/CDC25C/ORC4/MCM5/RFC5/RAD17/MCM4/RFC4/CDC25A/MCM10/RFC2/MCM7/RPA2/MCM3/ORC2/ORC6/MCM6/ORC5/CDC7/ATRIP
MANALO_HYPOXIA_DN	MANALO_HYPOXIA_DN	MANALO_HYPOXIA_DN	267	-0.715843	-2.35251	0.00122549	0.0246978	3121	tags=60%, list=16%, signal=51%	VWA8/C17orf80/NAT10/DLAT/POP7/FUS/HEATR3/SNRPD1/SLC25A10/CISD1/RANBP1/DDX23/HEATR1/SAR1B/POLD2/BARD1/DHX35/POLR3G/WDR12/TUBB4B/PRPS1/WDR4/MCM5/RBM28/MRPS12/RFC5/AKAP1/GK/PA2G4/NUP85/C1QBP/LBHD1/DHFR/MCM4/PDCD2/MTERF3/CSE1L/MRPL40/C20orf27/PUM3/TOR3A/ASF1B/GCSH/PPIF/UCHL5/RRP9/ATIC/GNPDA1/SLC19A1/PWP2/GLRX2/SNAPC5/SACS/DDX21/POMT2/SNRPA1/MCM10/PFAS/EEF1E1/NUP43/PRC1/NUP98/POLR3K/CCNE1/OIP5/RFC2/AB…
REACTOME_REMOVAL_OF_THE_FLAP_INTERMEDIATE_FROM_THE_C_STRAND	REACTOME_REMOVAL_OF_THE_FLAP_INTERMEDIATE_FROM_THE_C_STRAND	REACTOME_REMOVAL_OF_THE_FLAP_INTERMEDIATE_FROM_THE_C_STRAND	11	-0.713521	-1.41939	0.0428816	0.103904	3788	tags=73%, list=20%, signal=58%	DNA2/RPA1/POLD2/RPA3/WRN/RPA2/PCNA/FEN1
BONOME_OVARIAN_CANCER_POOR_SURVIVAL_DN	BONOME_OVARIAN_CANCER_POOR_SURVIVAL_DN	BONOME_OVARIAN_CANCER_POOR_SURVIVAL_DN	18	-0.713106	-1.59437	0.00958466	0.0354797	3019	tags=50%, list=16%, signal=42%	SS18/ASPSCR1/ACOT7/LPAR2/MTAP/HNRNPU/PAOX/HDHD3/TWNK
KEGG_AMINOACYL_TRNA_BIOSYNTHESIS	KEGG_AMINOACYL_TRNA_BIOSYNTHESIS	KEGG_AMINOACYL_TRNA_BIOSYNTHESIS	19	-0.712441	-1.61947	0.00473934	0.0268953	4253	tags=58%, list=22%, signal=45%	HARS2/FARSB/TARS2/SEPSECS/AARS2/LARS2/YARS2/FARSA/FARS2/MTFMT/MARS2
REACTOME_PROCESSIVE_SYNTHESIS_ON_THE_C_STRAND_OF_THE_TELOMERE	REACTOME_PROCESSIVE_SYNTHESIS_ON_THE_C_STRAND_OF_THE_TELOMERE	REACTOME_PROCESSIVE_SYNTHESIS_ON_THE_C_STRAND_OF_THE_TELOMERE	13	-0.711209	-1.47694	0.0318792	0.0854548	3788	tags=69%, list=20%, signal=56%	DNA2/RPA1/POLD2/RPA3/WRN/RPA2/PCNA/FEN1/BLM
REACTOME_TRNA_AMINOACYLATION	REACTOME_TRNA_AMINOACYLATION	REACTOME_TRNA_AMINOACYLATION	22	-0.710926	-1.65797	0.00319489	0.0246978	2311	tags=55%, list=12%, signal=48%	PPA2/HARS2/FARSB/TARS2/AARS2/LARS2/YARS2/FARSA/EEF1E1/FARS2/AIMP2/MARS2
REACTOME_DNA_STRAND_ELONGATION	REACTOME_DNA_STRAND_ELONGATION	REACTOME_DNA_STRAND_ELONGATION	32	-0.70997	-1.77534	0.00156986	0.0246978	3929	tags=69%, list=20%, signal=55%	RFC3/DNA2/MCM8/CDC45/RPA1/POLD2/RPA3/MCM5/RFC5/MCM4/RFC4/GINS4/RFC2/MCM7/RPA2/GINS2/MCM3/POLA2/PCNA/MCM6/FEN1/GINS3
KEGG_PROTEASOME	KEGG_PROTEASOME	KEGG_PROTEASOME	43	-0.706743	-1.88356	0.00150602	0.0246978	3385	tags=63%, list=18%, signal=52%	PSMB7/PSMB10/PSMB4/PSMD7/PSMC4/PSMB2/PSMA2/PSMD1/PSMB3/PSMF1/PSMA4/PSMD4/PSMD12/PSMB5/POMP/PSMB1/PSME2/PSMA3/PSMB6/PSMB9/PSMC5/PSMD6/PSMC3/PSMC1/PSMC2/PSMA5/PSME3
KEGG_DNA_REPLICATION	KEGG_DNA_REPLICATION	KEGG_DNA_REPLICATION	36	-0.703783	-1.80246	0.00153846	0.0246978	2662	tags=50%, list=14%, signal=43%	POLD2/RPA3/SSBP1/RNASEH1/MCM5/RFC5/MCM4/RFC4/RFC2/MCM7/RPA2/MCM3/POLA2/PCNA/MCM6/FEN1/POLE3/POLE2
EGUCHI_CELL_CYCLE_RB1_TARGETS	EGUCHI_CELL_CYCLE_RB1_TARGETS	EGUCHI_CELL_CYCLE_RB1_TARGETS	22	-0.702033	-1.63723	0.00319489	0.0246978	2386	tags=59%, list=12%, signal=52%	CDC25C/MCM5/MCM4/ECT2/CDCA8/MCM7/CENPE/KIF18A/KIF11/MCM3/CCNE2/MCM6/FEN1
ELVIDGE_HYPOXIA_DN	ELVIDGE_HYPOXIA_DN	ELVIDGE_HYPOXIA_DN	137	-0.701875	-2.1785	0.0013369	0.0246978	2317	tags=47%, list=12%, signal=41%	ASPSCR1/RNASEH1/RANGAP1/MRPS12/POLR3E/PRPF4B/LARS2/ADORA1/FASTKD5/GAS2L1/SLC29A1/TOR3A/PPIF/ACOT7/HSPH1/CDC20/RNF14/SLC35B1/EEF1E1/SPAG1/NUP98/POLR3K/GLYR1/RPP25/ABCF2/HHEX/DHX29/TIGAR/ZMPSTE24/WDR77/GPS1/SLC7A6/SNRNP40/HSPA4/PYCR3/RAB35/ETF1/LARP4/ATP6V0A2/ODC1/NCLN/RRP15/FLAD1/ELMO2/SLC35C1/SRSF1/PSME3/EXOSC4/C2CD2/SEC23IP/RIOX1/CEBPA/BRMS1/SLC5A6/CTPS1/TMEM50B/TMEM33/URB2/TIMM23/CALM1/PSEN2/PU…
REACTOME_PCNA_DEPENDENT_LONG_PATCH_BASE_EXCISION_REPAIR	REACTOME_PCNA_DEPENDENT_LONG_PATCH_BASE_EXCISION_REPAIR	REACTOME_PCNA_DEPENDENT_LONG_PATCH_BASE_EXCISION_REPAIR	21	-0.701119	-1.62107	0.00315457	0.0246978	2662	tags=52%, list=14%, signal=45%	RPA1/POLD2/RPA3/RFC5/RFC4/RFC2/RPA2/PCNA/FEN1/POLE3/POLE2
REACTOME_TELOMERE_C_STRAND_LAGGING_STRAND_SYNTHESIS	REACTOME_TELOMERE_C_STRAND_LAGGING_STRAND_SYNTHESIS	REACTOME_TELOMERE_C_STRAND_LAGGING_STRAND_SYNTHESIS	27	-0.698268	-1.68975	0.00160256	0.0246978	3228	tags=67%, list=17%, signal=56%	RFC3/DNA2/RPA1/CHTF18/POLD2/RPA3/CHTF8/RFC5/RFC4/WRN/STN1/RFC2/RPA2/POLA2/PCNA/FEN1/BLM/CTC1
REACTOME_BASE_EXCISION_REPAIR_AP_SITE_FORMATION	REACTOME_BASE_EXCISION_REPAIR_AP_SITE_FORMATION	REACTOME_BASE_EXCISION_REPAIR_AP_SITE_FORMATION	15	-0.696407	-1.50294	0.02443	0.0709925	2715	tags=60%, list=14%, signal=52%	OGG1/NEIL2/ACD/NEIL3/TERF2/TERF1/UNG/NTHL1/TDG
REACTOME_FORMATION_OF_ATP_BY_CHEMIOSMOTIC_COUPLING	REACTOME_FORMATION_OF_ATP_BY_CHEMIOSMOTIC_COUPLING	REACTOME_FORMATION_OF_ATP_BY_CHEMIOSMOTIC_COUPLING	16	-0.695244	-1.51045	0.0199336	0.0614562	3984	tags=69%, list=21%, signal=55%	ATP5F1B/ATP5F1D/ATP5PB/DMAC2L/ATP5ME/ATP5MC3/ATP5PF/ATP5MF/ATP5MC1/ATP5F1A/ATP5PD
REACTOME_DNA_REPLICATION_PRE_INITIATION	REACTOME_DNA_REPLICATION_PRE_INITIATION	REACTOME_DNA_REPLICATION_PRE_INITIATION	82	-0.693233	-2.03397	0.00141844	0.0246978	3467	tags=61%, list=18%, signal=50%	MCM8/PSMB7/CDC45/PSMB10/RPA1/PSMB4/PSMD7/PSMC4/PSMB2/PSMA2/PSMD9/RPA3/PSMD1/PSMB3/PSMF1/ORC4/PSMA4/MCM5/PSMD4/MCM4/PSMD12/PSMB5/MCM10/PSMB1/PSME2/MCM7/PSMA3/RPA2/GMNN/PSMB6/PSMB9/PSMC5/E2F3/MCM3/PSMD6/PSMC3/PSMC1/ORC2/ORC6/POLA2/PSMC2/E2F2/MCM6/PSMA5/PSME3/ORC5/POLE3/CDC7/UBB/POLE2
REACTOME_RESOLUTION_OF_ABASIC_SITES_AP_SITES	REACTOME_RESOLUTION_OF_ABASIC_SITES_AP_SITES	REACTOME_RESOLUTION_OF_ABASIC_SITES_AP_SITES	35	-0.691846	-1.75965	0.00156495	0.0246978	2715	tags=49%, list=14%, signal=42%	OGG1/POLD2/RPA3/NEIL2/RFC5/LIG3/RFC4/RFC2/ADPRHL2/RPA2/PCNA/UNG/FEN1/NTHL1/POLE3/POLE2/TDG
REACTOME_DEGRADATION_OF_CYSTEINE_AND_HOMOCYSTEINE	REACTOME_DEGRADATION_OF_CYSTEINE_AND_HOMOCYSTEINE	REACTOME_DEGRADATION_OF_CYSTEINE_AND_HOMOCYSTEINE	14	-0.691649	-1.47126	0.0315091	0.0849131	3520	tags=50%, list=18%, signal=41%	CSAD/GOT2/SLC25A10/CTH/ADO/TST/SUOX
REACTOME_METABOLISM_OF_COFACTORS	REACTOME_METABOLISM_OF_COFACTORS	REACTOME_METABOLISM_OF_COFACTORS	19	-0.686429	-1.56034	0.0157978	0.0521122	3127	tags=53%, list=16%, signal=44%	AKT1/HSP90AA1/COQ5/DHFR/COQ3/SPR/COQ9/COQ7/PDSS1/CALM1
REACTOME_MITOCHONDRIAL_TRANSLATION	REACTOME_MITOCHONDRIAL_TRANSLATION	REACTOME_MITOCHONDRIAL_TRANSLATION	89	-0.679132	-1.99811	0.0014245	0.0246978	2545	tags=61%, list=13%, signal=53%	GFM2/MRPL2/MRPS25/MRPS21/MRPL43/MRPS18B/MRPL34/MRPS15/MRPS30/MRPL39/MRPL12/MRPS36/MRPL50/MRPS22/MRPL4/MRPS12/PTCD3/MRPS9/MRPS18C/MRPL21/MRPL32/MRPS28/MRPL47/MRPL36/MRPL40/MRPL3/MRPL24/MRPS10/MRPL41/MRPL27/MRPL22/GFM1/MRPS23/MRPS14/MRPL15/AURKAIP1/MRPL1/MRPL52/MTFMT/MRPS18A/MRPL18/MRPL20/MRPS11/TSFM/MRPL16/MRPS7/MRPS17/MRPL38/ERAL1/MRPL58/MRPL35/MRPS26/MRPL46/MRPS31
REACTOME_ASSEMBLY_OF_THE_PRE_REPLICATIVE_COMPLEX	REACTOME_ASSEMBLY_OF_THE_PRE_REPLICATIVE_COMPLEX	REACTOME_ASSEMBLY_OF_THE_PRE_REPLICATIVE_COMPLEX	65	-0.678971	-1.91862	0.00147493	0.0246978	3467	tags=63%, list=18%, signal=52%	MCM8/PSMB7/PSMB10/PSMB4/PSMD7/PSMC4/PSMB2/PSMA2/PSMD9/PSMD1/PSMB3/PSMF1/ORC4/PSMA4/MCM5/PSMD4/MCM4/PSMD12/PSMB5/PSMB1/PSME2/MCM7/PSMA3/GMNN/PSMB6/PSMB9/PSMC5/E2F3/MCM3/PSMD6/PSMC3/PSMC1/ORC2/ORC6/PSMC2/E2F2/MCM6/PSMA5/PSME3/ORC5/UBB
REACTOME_MITOCHONDRIAL_TRNA_AMINOACYLATION	REACTOME_MITOCHONDRIAL_TRNA_AMINOACYLATION	REACTOME_MITOCHONDRIAL_TRNA_AMINOACYLATION	16	-0.677786	-1.47252	0.0282392	0.0783784	4465	tags=50%, list=23%, signal=38%	PPA2/HARS2/TARS2/AARS2/LARS2/YARS2/FARS2/MARS2
REACTOME_TRNA_MODIFICATION_IN_THE_NUCLEUS_AND_CYTOSOL	REACTOME_TRNA_MODIFICATION_IN_THE_NUCLEUS_AND_CYTOSOL	REACTOME_TRNA_MODIFICATION_IN_THE_NUCLEUS_AND_CYTOSOL	38	-0.677078	-1.746	0.00155039	0.0246978	2384	tags=39%, list=12%, signal=35%	WDR4/TRMT6/TRMT44/NSUN6/CTU2/PUS7/TRDMT1/TRMT61A/TP53RK/NSUN2/METTL1/DUS2/LCMT2/PUS1/QTRT2
REACTOME_ORC1_REMOVAL_FROM_CHROMATIN	REACTOME_ORC1_REMOVAL_FROM_CHROMATIN	REACTOME_ORC1_REMOVAL_FROM_CHROMATIN	68	-0.67693	-1.92237	0.00146843	0.0246978	3467	tags=62%, list=18%, signal=51%	MCM8/PSMB7/PSMB10/CCNA2/PSMB4/PSMD7/PSMC4/PSMB2/PSMA2/PSMD9/PSMD1/PSMB3/PSMF1/ORC4/PSMA4/MCM5/PSMD4/MCM4/PSMD12/PSMB5/SKP1/PSMB1/PSME2/MCM7/PSMA3/PSMB6/PSMB9/PSMC5/MCM3/PSMD6/CUL1/PSMC3/PSMC1/ORC2/ORC6/PSMC2/SKP2/MCM6/PSMA5/PSME3/ORC5/UBB
REACTOME_CROSS_PRESENTATION_OF_SOLUBLE_EXOGENOUS_ANTIGENS_ENDOSOMES	REACTOME_CROSS_PRESENTATION_OF_SOLUBLE_EXOGENOUS_ANTIGENS_ENDOSOMES	REACTOME_CROSS_PRESENTATION_OF_SOLUBLE_EXOGENOUS_ANTIGENS_ENDOSOMES	48	-0.674574	-1.82378	0.00149477	0.0246978	3385	tags=56%, list=18%, signal=46%	PSMB7/PSMB10/PSMB4/PSMD7/PSMC4/PSMB2/PSMA2/PSMD9/PSMD1/PSMB3/PSMF1/PSMA4/PSMD4/PSMD12/PSMB5/PSMB1/PSME2/PSMA3/PSMB6/PSMB9/PSMC5/PSMD6/PSMC3/PSMC1/PSMC2/PSMA5/PSME3
REACTOME_PROCESSING_OF_CAPPED_INTRONLESS_PRE_MRNA	REACTOME_PROCESSING_OF_CAPPED_INTRONLESS_PRE_MRNA	REACTOME_PROCESSING_OF_CAPPED_INTRONLESS_PRE_MRNA	25	-0.673909	-1.60748	0.00476948	0.0268953	3755	tags=64%, list=20%, signal=52%	NCBP1/SNRPF/LSM10/SNRPG/PAPOLA/CPSF3/NUDT21/SLBP/CSTF2T/SNRPB/CLP1/CSTF3/CSTF2/ZNF473/PCF11/CPSF4
REACTOME_BASE_EXCISION_REPAIR	REACTOME_BASE_EXCISION_REPAIR	REACTOME_BASE_EXCISION_REPAIR	42	-0.672993	-1.78389	0.00151286	0.0246978	2715	tags=50%, list=14%, signal=43%	OGG1/POLD2/RPA3/NEIL2/RFC5/ACD/LIG3/NEIL3/RFC4/TERF2/RFC2/ADPRHL2/RPA2/TERF1/PCNA/UNG/FEN1/NTHL1/POLE3/POLE2/TDG
GROSS_HYPOXIA_VIA_HIF1A_UP	GROSS_HYPOXIA_VIA_HIF1A_UP	GROSS_HYPOXIA_VIA_HIF1A_UP	68	-0.672265	-1.90912	0.00146843	0.0246978	2265	tags=43%, list=12%, signal=38%	TARDBP/USP46/PSMB5/CACYBP/CTH/SLC19A1/SIX4/TRIM21/DDX21/GTF2E1/LZTR1/HACD3/GART/NOP58/NSL1/TNRC6A/PLXNA1/SRSF1/ACSL5/PPRC1/MGAT2/SRSF7/CTPS1/RCC2/NOP56/NOP2/RCL1/MAT2A/SRSF5
ABRAMSON_INTERACT_WITH_AIRE	ABRAMSON_INTERACT_WITH_AIRE	ABRAMSON_INTERACT_WITH_AIRE	39	-0.67192	-1.738	0.00156986	0.0246978	2819	tags=54%, list=15%, signal=46%	GCN1/MSH6/MCM5/XPO1/C1QBP/POLR2A/NUP93/SNRPB/RANBP2/SUPT16H/GEMIN5/MYBBP1A/EFTUD2/PCNA/MCM6/SRSF3/DDX5/SRSF1/NASP/NOP56/SRSF2
REACTOME_RESOLUTION_OF_AP_SITES_VIA_THE_MULTIPLE_NUCLEOTIDE_PATCH_REPLACEMENT_PATHWAY	REACTOME_RESOLUTION_OF_AP_SITES_VIA_THE_MULTIPLE_NUCLEOTIDE_PATCH_REPLACEMENT_PATHWAY	REACTOME_RESOLUTION_OF_AP_SITES_VIA_THE_MULTIPLE_NUCLEOTIDE_PATCH_REPLACEMENT_PATHWAY	24	-0.670447	-1.5844	0.00477707	0.0268953	2662	tags=50%, list=14%, signal=43%	RPA1/POLD2/RPA3/RFC5/RFC4/RFC2/ADPRHL2/RPA2/PCNA/FEN1/POLE3/POLE2
BURTON_ADIPOGENESIS_PEAK_AT_16HR	BURTON_ADIPOGENESIS_PEAK_AT_16HR	BURTON_ADIPOGENESIS_PEAK_AT_16HR	40	-0.66762	-1.73845	0.00155763	0.0246978	2681	tags=50%, list=14%, signal=43%	MSH6/PRPS1/MCM5/FAM111A/MCM4/ABCF1/ASF1B/DDX21/HELLS/ABCF2/MCM7/GRWD1/NAP1L4/MRPL18/MCM3/PGP/POLA2/MCM6/CHAF1B/FEN1
GARGALOVIC_RESPONSE_TO_OXIDIZED_PHOSPHOLIPIDS_RED_DN	GARGALOVIC_RESPONSE_TO_OXIDIZED_PHOSPHOLIPIDS_RED_DN	GARGALOVIC_RESPONSE_TO_OXIDIZED_PHOSPHOLIPIDS_RED_DN	25	-0.666935	-1.59084	0.00476948	0.0268953	1825	tags=48%, list=9%, signal=44%	HLX/SESN1/SPTLC2/INKA1/MLYCD/ZNF436/RAB11A/NR5A2/RALA/ZKSCAN4/CEP68/SUOX
REACTOME_PROCESSIVE_SYNTHESIS_ON_THE_LAGGING_STRAND	REACTOME_PROCESSIVE_SYNTHESIS_ON_THE_LAGGING_STRAND	REACTOME_PROCESSIVE_SYNTHESIS_ON_THE_LAGGING_STRAND	15	-0.666531	-1.43846	0.0472313	0.110436	3788	tags=53%, list=20%, signal=43%	DNA2/RPA1/POLD2/RPA3/RPA2/POLA2/PCNA/FEN1
REACTOME_RNA_POLYMERASE_III_TRANSCRIPTION_INITIATION_FROM_TYPE_1_PROMOTER	REACTOME_RNA_POLYMERASE_III_TRANSCRIPTION_INITIATION_FROM_TYPE_1_PROMOTER	REACTOME_RNA_POLYMERASE_III_TRANSCRIPTION_INITIATION_FROM_TYPE_1_PROMOTER	25	-0.665495	-1.58741	0.00476948	0.0268953	3349	tags=72%, list=17%, signal=60%	GTF3C3/POLR2F/GTF3C5/POLR3A/GTF3C1/POLR3G/POLR3E/POLR3C/POLR3K/POLR3GL/GTF3C6/BRF1/GTF3C2/POLR2L/POLR3H/TBP/POLR1C/POLR3B
REACTOME_SULFUR_AMINO_ACID_METABOLISM	REACTOME_SULFUR_AMINO_ACID_METABOLISM	REACTOME_SULFUR_AMINO_ACID_METABOLISM	24	-0.665241	-1.5721	0.00477707	0.0268953	3520	tags=46%, list=18%, signal=37%	CSAD/GOT1/GOT2/SLC25A10/MTR/CTH/MTAP/MTRR/ADO/TST/SUOX
BIOCARTA_MCM_PATHWAY	BIOCARTA_MCM_PATHWAY	BIOCARTA_MCM_PATHWAY	17	-0.664975	-1.45923	0.0330579	0.0874631	2344	tags=65%, list=12%, signal=57%	ORC4/MCM5/MCM4/KITLG/CCNE1/MCM7/MCM3/ORC2/ORC6/MCM6/ORC5
REACTOME_DNA_REPLICATION	REACTOME_DNA_REPLICATION	REACTOME_DNA_REPLICATION	124	-0.664904	-2.03939	0.00134953	0.0246978	3788	tags=59%, list=20%, signal=48%	DNA2/ANAPC5/PSMD14/ANAPC2/CDC23/MCM8/PSMB7/CDC45/PSMB10/RPA1/CCNA2/PSMB4/PSMD7/PSMC4/PSMB2/PSMA2/POLD2/PSMD9/RPA3/PSMD1/PSMB3/PSMF1/ORC4/PSMA4/MCM5/PSMD4/RFC5/MCM4/PSMD12/PSMB5/RFC4/SKP1/MCM10/GINS4/CCNE1/RFC2/PSMB1/ANAPC4/PSME2/MCM7/PSMA3/RPA2/GINS2/GMNN/PSMB6/PSMB9/PSMC5/E2F3/ANAPC7/MCM3/PSMD6/CUL1/PSMC3/PSMC1/CCNE2/ORC2/ORC6/POLA2/PCNA/PSMC2/SKP2/E2F2/MCM6/FEN1/PSMA5/PSME3/ORC5/GINS3/CDC16/POL…
KEGG_SELENOAMINO_ACID_METABOLISM	KEGG_SELENOAMINO_ACID_METABOLISM	KEGG_SELENOAMINO_ACID_METABOLISM	20	-0.663615	-1.51377	0.0142405	0.048141	1646	tags=30%, list=9%, signal=27%	CTH/MAT2B/SEPHS2/LCMT2/MARS2/MAT2A
REACTOME_MICRORNA_MIRNA_BIOGENESIS	REACTOME_MICRORNA_MIRNA_BIOGENESIS	REACTOME_MICRORNA_MIRNA_BIOGENESIS	23	-0.663549	-1.55902	0.00636943	0.0295788	3071	tags=52%, list=16%, signal=44%	RAN/POLR2F/DROSHA/TARBP2/POLR2A/POLR2G/XPO5/DICER1/POLR2D/POLR2L/DGCR8/BCDIN3D
REACTOME_NEGATIVE_REGULATION_OF_NOTCH4_SIGNALING	REACTOME_NEGATIVE_REGULATION_OF_NOTCH4_SIGNALING	REACTOME_NEGATIVE_REGULATION_OF_NOTCH4_SIGNALING	51	-0.663369	-1.81317	0.00147493	0.0246978	3385	tags=63%, list=18%, signal=52%	PSMB7/PSMB10/PSMB4/AKT1/PSMD7/PSMC4/PSMB2/PSMA2/PSMD9/PSMD1/PSMB3/PSMF1/TACC3/PSMA4/PSMD4/PSMD12/PSMB5/SKP1/PSMB1/PSME2/PSMA3/PSMB6/PSMB9/PSMC5/PSMD6/CUL1/PSMC3/PSMC1/PSMC2/PSMA5/PSME3/UBB
BIOCARTA_GCR_PATHWAY	BIOCARTA_GCR_PATHWAY	BIOCARTA_GCR_PATHWAY	16	-0.660939	-1.43592	0.0431894	0.104175	3127	tags=38%, list=16%, signal=31%	AKT1/HSP90AA1/CALM2/PIK3R1/ANXA1/CALM1
REACTOME_MRNA_SPLICING_MINOR_PATHWAY	REACTOME_MRNA_SPLICING_MINOR_PATHWAY	REACTOME_MRNA_SPLICING_MINOR_PATHWAY	46	-0.658559	-1.77351	0.00147493	0.0246978	3874	tags=57%, list=20%, signal=45%	POLR2F/RNPC3/NCBP1/SNRPF/SNRPG/PDCD7/SNRPD1/SF3B4/DDX23/SNRNP35/GTF2F2/POLR2A/POLR2G/SF3B5/SNRNP25/SNRPB/SNU13/SNRNP40/POLR2D/POLR2L/EFTUD2/SRSF1/SRSF6/DDX42/SRSF7/SRSF2
NIKOLSKY_BREAST_CANCER_5P15_AMPLICON	NIKOLSKY_BREAST_CANCER_5P15_AMPLICON	NIKOLSKY_BREAST_CANCER_5P15_AMPLICON	24	-0.656218	-1.55077	0.00796178	0.0317868	1895	tags=29%, list=10%, signal=26%	NKD2/MRPL36/PDCD6/CLPTM1L/IRX4/TRIP13/BRD9
REACTOME_EXTENSION_OF_TELOMERES	REACTOME_EXTENSION_OF_TELOMERES	REACTOME_EXTENSION_OF_TELOMERES	43	-0.655824	-1.74785	0.00150602	0.0246978	2662	tags=53%, list=14%, signal=46%	RPA1/CHTF18/POLD2/RPA3/CHTF8/NOP10/RFC5/ACD/RFC4/WRN/STN1/TERF2/RFC2/RPA2/TERF1/GAR1/RUVBL1/POLA2/PCNA/DKC1/FEN1/BLM/CTC1
REACTOME_TELOMERE_MAINTENANCE	REACTOME_TELOMERE_MAINTENANCE	REACTOME_TELOMERE_MAINTENANCE	43	-0.655824	-1.74785	0.00150602	0.0246978	2662	tags=53%, list=14%, signal=46%	RPA1/CHTF18/POLD2/RPA3/CHTF8/NOP10/RFC5/ACD/RFC4/WRN/STN1/TERF2/RFC2/RPA2/TERF1/GAR1/RUVBL1/POLA2/PCNA/DKC1/FEN1/BLM/CTC1
REACTOME_LAGGING_STRAND_SYNTHESIS	REACTOME_LAGGING_STRAND_SYNTHESIS	REACTOME_LAGGING_STRAND_SYNTHESIS	20	-0.655405	-1.49504	0.0237342	0.0697598	3929	tags=60%, list=20%, signal=48%	RFC3/DNA2/RPA1/POLD2/RPA3/RFC5/RFC4/RFC2/RPA2/POLA2/PCNA/FEN1
WEST_ADRENOCORTICAL_CARCINOMA_VS_ADENOMA_UP	WEST_ADRENOCORTICAL_CARCINOMA_VS_ADENOMA_UP	WEST_ADRENOCORTICAL_CARCINOMA_VS_ADENOMA_UP	19	-0.651515	-1.48097	0.0331754	0.087687	1541	tags=37%, list=8%, signal=34%	AUNIP/NUP88/TRAIP/HOXB13/FAT1/SLC35C1/DDX56
REACTOME_HOMOLOGOUS_DNA_PAIRING_AND_STRAND_EXCHANGE	REACTOME_HOMOLOGOUS_DNA_PAIRING_AND_STRAND_EXCHANGE	REACTOME_HOMOLOGOUS_DNA_PAIRING_AND_STRAND_EXCHANGE	39	-0.6462	-1.67147	0.00156986	0.0246978	3929	tags=54%, list=20%, signal=43%	RFC3/TOP3A/DNA2/RAD51AP1/RPA1/BARD1/RMI1/RPA3/RFC5/RMI2/RAD17/RAD51C/RFC4/WRN/RFC2/RPA2/BRCA1/PALB2/BLM/RHNO1/ATRIP
HESS_TARGETS_OF_HOXA9_AND_MEIS1_UP	HESS_TARGETS_OF_HOXA9_AND_MEIS1_UP	HESS_TARGETS_OF_HOXA9_AND_MEIS1_UP	63	-0.644665	-1.81455	0.00146199	0.0246978	2828	tags=43%, list=15%, signal=37%	PINX1/TRMT2A/CLDN15/DTYMK/PHGDH/C1QBP/NEDD4/UHRF1/NCL/ASNS/SNRPA1/MCM3AP/DNAJA3/MCM7/TRIP13/MRPL15/TP53BP1/MCM3/BID/NOP58/RUVBL1/NOLC1/ODC1/CEBPA/CTPS1/RRS1/TST
KEGG_BASAL_TRANSCRIPTION_FACTORS	KEGG_BASAL_TRANSCRIPTION_FACTORS	KEGG_BASAL_TRANSCRIPTION_FACTORS	30	-0.644549	-1.58471	0.00478469	0.0268953	2663	tags=37%, list=14%, signal=32%	TAF4B/GTF2H4/GTF2F2/TAF5/TAF4/GTF2H1/GTF2A2/GTF2E1/GTF2H2/TAF6L/TBP
SMID_BREAST_CANCER_LUMINAL_A_DN	SMID_BREAST_CANCER_LUMINAL_A_DN	SMID_BREAST_CANCER_LUMINAL_A_DN	18	-0.643167	-1.438	0.0463259	0.1087	1581	tags=33%, list=8%, signal=31%	CDC45/CDC20/CDCA8/CCNE1/TTLL4/DKC1
REACTOME_SWITCHING_OF_ORIGINS_TO_A_POST_REPLICATIVE_STATE	REACTOME_SWITCHING_OF_ORIGINS_TO_A_POST_REPLICATIVE_STATE	REACTOME_SWITCHING_OF_ORIGINS_TO_A_POST_REPLICATIVE_STATE	87	-0.641213	-1.88983	0.00141243	0.0246978	3785	tags=59%, list=20%, signal=47%	ANAPC5/PSMD14/ANAPC2/CDC23/MCM8/PSMB7/PSMB10/CCNA2/PSMB4/PSMD7/PSMC4/PSMB2/PSMA2/PSMD9/PSMD1/PSMB3/PSMF1/ORC4/PSMA4/MCM5/PSMD4/MCM4/PSMD12/PSMB5/SKP1/CCNE1/PSMB1/ANAPC4/PSME2/MCM7/PSMA3/PSMB6/PSMB9/PSMC5/ANAPC7/MCM3/PSMD6/CUL1/PSMC3/PSMC1/CCNE2/ORC2/ORC6/PSMC2/SKP2/MCM6/PSMA5/PSME3/ORC5/CDC16/UBB
REACTOME_DEGRADATION_OF_GLI1_BY_THE_PROTEASOME	REACTOME_DEGRADATION_OF_GLI1_BY_THE_PROTEASOME	REACTOME_DEGRADATION_OF_GLI1_BY_THE_PROTEASOME	58	-0.639537	-1.78212	0.00147275	0.0246978	3385	tags=57%, list=18%, signal=47%	PSMB7/PSMB10/PRKACB/PSMB4/PSMD7/PSMC4/PSMB2/PSMA2/PSMD9/PSMD1/PSMB3/PSMF1/PSMA4/PSMD4/PSMD12/PSMB5/SKP1/ITCH/BTRC/PSMB1/PSME2/PSMA3/PSMB6/PSMB9/PSMC5/PSMD6/CUL1/PSMC3/PSMC1/PSMC2/PSMA5/PSME3/UBB
REACTOME_POSTMITOTIC_NUCLEAR_PORE_COMPLEX_NPC_REFORMATION	REACTOME_POSTMITOTIC_NUCLEAR_PORE_COMPLEX_NPC_REFORMATION	REACTOME_POSTMITOTIC_NUCLEAR_PORE_COMPLEX_NPC_REFORMATION	26	-0.639106	-1.53173	0.00482315	0.0270037	2247	tags=46%, list=12%, signal=41%	RANGAP1/NUP85/NUP93/NUP43/NUP98/NUP62/RCC1/SEH1L/NUP35/NUP54/NUP37/AHCTF1
REACTOME_TRNA_PROCESSING	REACTOME_TRNA_PROCESSING	REACTOME_TRNA_PROCESSING	98	-0.634694	-1.8897	0.00139082	0.0246978	3161	tags=50%, list=16%, signal=42%	TSEN15/ADAT2/POP7/HSD17B10/NUP107/ALKBH8/RTCB/WDR4/TRMT6/ZBTB8OS/NUP85/GTPBP3/ELAC2/NUP93/TRMT44/NUP214/NSUN6/NUP43/NUP98/TRMU/RPP25/CTU2/RANBP2/NUP62/PUS7/TRDMT1/CLP1/TRNT1/DDX1/SEH1L/NUP35/TRMT61A/RPP38/POP5/TRMT61B/TP53RK/NUP54/NUP37/RPP40/CSTF2/POP1/NSUN2/TRMT10C/CPSF4/METTL1/DUS2/LCMT2/PUS1/QTRT2
GARGALOVIC_RESPONSE_TO_OXIDIZED_PHOSPHOLIPIDS_TURQUOISE_DN	GARGALOVIC_RESPONSE_TO_OXIDIZED_PHOSPHOLIPIDS_TURQUOISE_DN	GARGALOVIC_RESPONSE_TO_OXIDIZED_PHOSPHOLIPIDS_TURQUOISE_DN	51	-0.634038	-1.733	0.00147493	0.0246978	2695	tags=49%, list=14%, signal=42%	NXF1/BARD1/E2F8/MKI67/TACC3/FAM111A/PPP1R35/ZNF174/NEIL3/KIFC1/CDC20/AURKA/CCDC51/ELOVL6/TIMM8A/PRMT7/SKP2/GEMIN6/OSGEPL1/PAGR1/POLR3B/CBX2/DDX28/RRS1/EXOSC2
SONG_TARGETS_OF_IE86_CMV_PROTEIN	SONG_TARGETS_OF_IE86_CMV_PROTEIN	SONG_TARGETS_OF_IE86_CMV_PROTEIN	51	-0.633693	-1.73206	0.00147493	0.0246978	2818	tags=45%, list=15%, signal=39%	EZH2/DDX23/BARD1/CASP3/MCM5/PTTG1/DHFR/SLC29A1/RAD51C/NUP214/CCNE1/RFC2/MCM7/KIF11/MCM3/ZWINT/PCNA/DNAJC9/UNG/MCM6/FLAD1/BLM/NASP
REACTOME_AUF1_HNRNP_D0_BINDS_AND_DESTABILIZES_MRNA	REACTOME_AUF1_HNRNP_D0_BINDS_AND_DESTABILIZES_MRNA	REACTOME_AUF1_HNRNP_D0_BINDS_AND_DESTABILIZES_MRNA	53	-0.632968	-1.73418	0.0015015	0.0246978	3385	tags=57%, list=18%, signal=47%	PSMB7/PSMB10/PSMB4/PSMD7/PSMC4/PSMB2/PSMA2/PSMD9/PSMD1/PSMB3/PSMF1/PSMA4/PSMD4/PSMD12/PSMB5/EIF4G1/PSMB1/PSME2/PSMA3/HNRNPD/PSMB6/PSMB9/PSMC5/PSMD6/PSMC3/PSMC1/PSMC2/PSMA5/PSME3/UBB
BENPORATH_ES_2	BENPORATH_ES_2	BENPORATH_ES_2	38	-0.632458	-1.63093	0.00465116	0.0266381	3517	tags=45%, list=18%, signal=37%	DNMT3A/DBNDD1/GPR19/RBM4/GOLGA7/CHEK2/DTYMK/RRP9/CDC25A/PWP2/MCM10/HELLS/ERCC6L/ORC2/EPHA1/TXLNG/SLC5A6
DACOSTA_UV_RESPONSE_VIA_ERCC3_XPCS_UP	DACOSTA_UV_RESPONSE_VIA_ERCC3_XPCS_UP	DACOSTA_UV_RESPONSE_VIA_ERCC3_XPCS_UP	21	-0.632	-1.46126	0.0378549	0.095249	1646	tags=48%, list=9%, signal=44%	CASP3/CTH/TRIM21/TERF2/FRAT2/IRF1/CCNT2/ADO/MED6/RPUSD2
YANG_BREAST_CANCER_ESR1_BULK_UP	YANG_BREAST_CANCER_ESR1_BULK_UP	YANG_BREAST_CANCER_ESR1_BULK_UP	26	-0.63189	-1.51443	0.0096463	0.0355895	3268	tags=35%, list=17%, signal=29%	LILRB1/BLVRA/PTP4A2/MYO5C/SKP1/RETREG1/INPP5J/REEP5/AGGF1
REACTOME_DECTIN_1_MEDIATED_NONCANONICAL_NF_KB_SIGNALING	REACTOME_DECTIN_1_MEDIATED_NONCANONICAL_NF_KB_SIGNALING	REACTOME_DECTIN_1_MEDIATED_NONCANONICAL_NF_KB_SIGNALING	59	-0.628458	-1.75693	0.00147059	0.0246978	3385	tags=54%, list=18%, signal=45%	PSMB7/PSMB10/PSMB4/PSMD7/PSMC4/PSMB2/PSMA2/PSMD9/PSMD1/PSMB3/PSMF1/PSMA4/PSMD4/PSMD12/PSMB5/SKP1/UBA3/BTRC/PSMB1/PSME2/PSMA3/PSMB6/PSMB9/PSMC5/PSMD6/CUL1/PSMC3/PSMC1/PSMC2/PSMA5/PSME3/UBB
REACTOME_SCF_SKP2_MEDIATED_DEGRADATION_OF_P27_P21	REACTOME_SCF_SKP2_MEDIATED_DEGRADATION_OF_P27_P21	REACTOME_SCF_SKP2_MEDIATED_DEGRADATION_OF_P27_P21	57	-0.627121	-1.74321	0.00147929	0.0246978	3385	tags=63%, list=18%, signal=52%	PSMB7/PSMB10/CDK4/CCNA2/PSMB4/PSMD7/PSMC4/PSMB2/PSMA2/PSMD9/PSMD1/PSMB3/PSMF1/PSMA4/PSMD4/PSMD12/PSMB5/SKP1/CCNE1/PSMB1/PSME2/PSMA3/PSMB6/PSMB9/PSMC5/PSMD6/CUL1/PSMC3/PSMC1/CCND1/CCNE2/PSMC2/SKP2/PSMA5/PSME3/UBB
SCIAN_CELL_CYCLE_TARGETS_OF_TP53_AND_TP73_DN	SCIAN_CELL_CYCLE_TARGETS_OF_TP53_AND_TP73_DN	SCIAN_CELL_CYCLE_TARGETS_OF_TP53_AND_TP73_DN	20	-0.62665	-1.42945	0.0443038	0.106192	3599	tags=60%, list=19%, signal=49%	RAN/CDC25B/CCNA2/DTYMK/CDC25C/MYC/CDC20/MCM7/AURKA/KIF23/MCM6/CCNB1
REACTOME_GAP_FILLING_DNA_REPAIR_SYNTHESIS_AND_LIGATION_IN_GG_NER	REACTOME_GAP_FILLING_DNA_REPAIR_SYNTHESIS_AND_LIGATION_IN_GG_NER	REACTOME_GAP_FILLING_DNA_REPAIR_SYNTHESIS_AND_LIGATION_IN_GG_NER	24	-0.625611	-1.47844	0.022293	0.0661808	2662	tags=50%, list=14%, signal=43%	RPA1/POLD2/RPA3/RFC5/LIG3/RFC4/RFC2/RPA2/PCNA/POLE3/UBB/POLE2
KAUFFMANN_MELANOMA_RELAPSE_UP	KAUFFMANN_MELANOMA_RELAPSE_UP	KAUFFMANN_MELANOMA_RELAPSE_UP	57	-0.624957	-1.7372	0.00147929	0.0246978	3507	tags=56%, list=18%, signal=46%	CCNH/RAD51AP1/CDC45/FANCG/OGG1/MSH6/CHEK2/RPA3/ORC4/CENPF/RFC5/PTTG1/RAD17/MCM4/NEIL3/RFC4/TDP1/RFC2/EME1/GTF2H2/MCM7/CHAF1A/GINS2/TERF1/GMNN/MCM3/BRCA1/ORC6/PCNA/DCLRE1A/MCM6/BLM
REACTOME_RMTS_METHYLATE_HISTONE_ARGININES	REACTOME_RMTS_METHYLATE_HISTONE_ARGININES	REACTOME_RMTS_METHYLATE_HISTONE_ARGININES	30	-0.623872	-1.53387	0.00956938	0.0354624	4354	tags=63%, list=23%, signal=49%	SMARCD2/SMARCC2/SMARCD3/PRMT1/SMARCA2/JAK2/DNMT3A/PRMT5/CDK4/ACTL6A/ARID2/WDR77/COPRS/PRMT7/WDR5/CCND1/SMARCD1/PRMT3/PRMT6
GARY_CD5_TARGETS_DN	GARY_CD5_TARGETS_DN	GARY_CD5_TARGETS_DN	396	-0.623387	-2.11072	0.00115075	0.0246978	2040	tags=41%, list=11%, signal=37%	MRPL32/IPO11/LARS2/CHORDC1/OGA/CUL4A/PSMB5/FRMD8/SSU72/GTF2H1/EIF1AX/PPIL1/MRPL36/CENPI/PUM3/RABEPK/UHRF1/FARSA/UCHL5/IFI35/RRP9/CDC25A/PPWD1/HSPH1/KLC1/ADSL/API5/SAP18/CSTF2T/OIP5/RFC2/GFM1/ABCF2/SRSF8/MRPS23/RPF1/UBAP2L/FOXO1/PAN2/DCTPP1/ATP6V1C1/GTF2H2/XPO4/DHX29/TM2D2/USP15/CDK5RAP1/EIF5/MRPL15/LANCL2/MRPL1/WDR77/ERCC6L/HNRNPD/SERBP1/GMNN/DDX18/FAM98A/PSMC5/ANAPC7/HSPA4/MRPL20/MRPS11/UTP3/TSF…
CAFFAREL_RESPONSE_TO_THC_DN	CAFFAREL_RESPONSE_TO_THC_DN	CAFFAREL_RESPONSE_TO_THC_DN	30	-0.620865	-1.52648	0.00956938	0.0354624	3609	tags=57%, list=19%, signal=46%	SPIDR/GIPC1/SESN1/CCNA2/RBM4/TUBB/TUBA1A/DHFR/UHRF1/PPIF/HSPH1/HSPA2/UBAC1/MCM3/ZWINT/MCM6/SRSF3
GROSS_HYPOXIA_VIA_ELK3_AND_HIF1A_DN	GROSS_HYPOXIA_VIA_ELK3_AND_HIF1A_DN	GROSS_HYPOXIA_VIA_ELK3_AND_HIF1A_DN	95	-0.620236	-1.84372	0.00140449	0.0246978	2882	tags=43%, list=15%, signal=37%	SRSF10/TEX30/KPNA2/DIDO1/LGALS3BP/FAS/CASP3/GATA2/TARDBP/USP46/ETS2/CACYBP/CDC25A/IL1R1/TRIM21/NRARP/PRPF19/LZTR1/CAMKK2/HACD3/SIGMAR1/PYCR2/ELOVL6/SAC3D1/GART/NSL1/SEPHS2/CCND1/SLC9A3R1/TNRC6A/BMP4/PLXNA1/SRSF1/ZMAT3/MGAT2/SRSF7/RCC2/CCNB1/SRSF2/MAT2A/SRSF5
MOREAUX_B_LYMPHOCYTE_MATURATION_BY_TACI_DN	MOREAUX_B_LYMPHOCYTE_MATURATION_BY_TACI_DN	MOREAUX_B_LYMPHOCYTE_MATURATION_BY_TACI_DN	74	-0.620125	-1.78995	0.00142857	0.0246978	2818	tags=43%, list=15%, signal=37%	EZH2/BARD1/GPR89B/SSBP1/KLF13/MRPS12/CHMP4A/G3BP1/C1QBP/THYN1/CEP295/NUDT5/TDP2/NMT1/CCT2/RPL26L1/PTPMT1/AASDHPPT/MALSU1/EDRF1/DDX1/ASF1A/EFTUD2/EMC4/CYP2R1/UTP4/DKC1/TEFM/EBNA1BP2/NASP/C1orf131/AIMP2
MOSERLE_IFNA_RESPONSE	MOSERLE_IFNA_RESPONSE	MOSERLE_IFNA_RESPONSE	25	-0.620005	-1.4789	0.0238474	0.0698826	2879	tags=32%, list=15%, signal=27%	USP18/DDX60/IFIH1/MX1/OASL/IFIT2/STAT1/IFIT1
REACTOME_G2_M_CHECKPOINTS	REACTOME_G2_M_CHECKPOINTS	REACTOME_G2_M_CHECKPOINTS	127	-0.619101	-1.90471	0.00135135	0.0246978	3467	tags=51%, list=18%, signal=42%	MCM8/PSMB7/CDC45/PSMB10/RPA1/PSMB4/PSMD7/PSMC4/PSMB2/YWHAB/PSMA2/BARD1/CHEK2/RMI1/PSMD9/RPA3/PSMD1/PSMB3/PSMF1/CDC25C/ORC4/PSMA4/MCM5/PSMD4/RFC5/RMI2/RAD17/MCM4/PSMD12/PSMB5/RFC4/CDC25A/WRN/MCM10/RFC2/PSMB1/HERC2/PSME2/MCM7/PSMA3/TP53BP1/RPA2/PSMB6/PSMB9/PSMC5/MCM3/PSMD6/YWHAH/PSMC3/PSMC1/BRCA1/ORC2/ORC6/PSMC2/UBE2N/MCM6/PSMA5/PSME3/ORC5/CDC7/BLM/UBB/RHNO1/CCNB1/ATRIP
REACTOME_THE_ROLE_OF_GTSE1_IN_G2_M_PROGRESSION_AFTER_G2_CHECKPOINT	REACTOME_THE_ROLE_OF_GTSE1_IN_G2_M_PROGRESSION_AFTER_G2_CHECKPOINT	REACTOME_THE_ROLE_OF_GTSE1_IN_G2_M_PROGRESSION_AFTER_G2_CHECKPOINT	73	-0.616494	-1.77004	0.00144928	0.0246978	3385	tags=52%, list=18%, signal=43%	PSMB7/PSMB10/TUBA1C/FKBPL/PSMB4/PSMD7/PSMC4/HSP90AA1/PSMB2/PSMA2/TUBA1B/PSMD9/TUBB4B/PSMD1/PSMB3/PSMF1/TUBB4A/PSMA4/TUBA1A/PSMD4/PSMD12/PSMB5/PSMB1/PSME2/PSMA3/TUBB6/MAPRE1/PSMB6/PSMB9/PSMC5/PSMD6/PSMC3/PSMC1/PSMC2/PSMA5/PSME3/UBB/CCNB1
REACTOME_APC_C_CDH1_MEDIATED_DEGRADATION_OF_CDC20_AND_OTHER_APC_C_CDH1_TARGETED_PROTEINS_IN_LATE_MITOSIS_EARLY_G1	REACTOME_APC_C_CDH1_MEDIATED_DEGRADATION_OF_CDC20_AND_OTHER_APC_C_CDH1_TARGETED_PROTEINS_IN_LATE_MITOSIS_EARLY_G1	REACTOME_APC_C_CDH1_MEDIATED_DEGRADATION_OF_CDC20_AND_OTHER_APC_C_CDH1_TARGETED_PROTEINS_IN_LATE_MITOSIS_EARLY_G1	70	-0.615659	-1.75277	0.00147275	0.0246978	3785	tags=56%, list=20%, signal=45%	ANAPC5/PSMD14/ANAPC2/CDC23/PSMB7/PSMB10/PSMB4/PSMD7/PSMC4/PSMB2/PSMA2/PSMD9/PSMD1/PSMB3/PSMF1/PSMA4/PSMD4/PTTG1/PSMD12/PSMB5/CDC20/PSMB1/ANAPC4/PSME2/PSMA3/AURKA/PSMB6/PSMB9/PSMC5/ANAPC7/PSMD6/PSMC3/PSMC1/PSMC2/SKP2/PSMA5/PSME3/CDC16/UBB
GARGALOVIC_RESPONSE_TO_OXIDIZED_PHOSPHOLIPIDS_GREEN_DN	GARGALOVIC_RESPONSE_TO_OXIDIZED_PHOSPHOLIPIDS_GREEN_DN	GARGALOVIC_RESPONSE_TO_OXIDIZED_PHOSPHOLIPIDS_GREEN_DN	21	-0.614065	-1.4198	0.0425868	0.103689	2700	tags=38%, list=14%, signal=33%	ASTE1/PSRC1/THUMPD3/RPP25/B4GALT5/CLUAP1/DUS2/TMEM177
REACTOME_DEGRADATION_OF_DVL	REACTOME_DEGRADATION_OF_DVL	REACTOME_DEGRADATION_OF_DVL	55	-0.613699	-1.6936	0.00149254	0.0246978	3736	tags=58%, list=19%, signal=47%	PSMD14/CUL3/KLHL12/PSMB7/PSMB10/PSMB4/PSMD7/PSMC4/PSMB2/PSMA2/PSMD9/PSMD1/PSMB3/PSMF1/PSMA4/PSMD4/DVL3/PSMD12/PSMB5/PSMB1/PSME2/PSMA3/PSMB6/PSMB9/PSMC5/PSMD6/PSMC3/PSMC1/PSMC2/PSMA5/PSME3/UBB
REACTOME_DEGRADATION_OF_AXIN	REACTOME_DEGRADATION_OF_AXIN	REACTOME_DEGRADATION_OF_AXIN	53	-0.610483	-1.67258	0.003003	0.0246978	3385	tags=55%, list=18%, signal=45%	PSMB7/PSMB10/PSMB4/PSMD7/PSMC4/PSMB2/PSMA2/PSMD9/PSMD1/PSMB3/PSMF1/PSMA4/PSMD4/AXIN2/PSMD12/PSMB5/PSMB1/PSME2/PSMA3/PSMB6/PSMB9/PSMC5/PSMD6/PSMC3/PSMC1/PSMC2/PSMA5/PSME3/UBB
REACTOME_ASYMMETRIC_LOCALIZATION_OF_PCP_PROTEINS	REACTOME_ASYMMETRIC_LOCALIZATION_OF_PCP_PROTEINS	REACTOME_ASYMMETRIC_LOCALIZATION_OF_PCP_PROTEINS	62	-0.609619	-1.71187	0.00146628	0.0246978	3485	tags=50%, list=18%, signal=41%	FZD7/PSMB7/PSMB10/PSMB4/PSMD7/PSMC4/PSMB2/PSMA2/PSMD9/PSMD1/PSMB3/PSMF1/PSMA4/PSMD4/PSMD12/PSMB5/SCRIB/PSMB1/PSME2/PSMA3/PSMB6/PSMB9/PSMC5/PSMD6/PSMC3/PSMC1/PSMC2/FZD4/PSMA5/PSME3/UBB
REACTOME_COMPLEX_I_BIOGENESIS	REACTOME_COMPLEX_I_BIOGENESIS	REACTOME_COMPLEX_I_BIOGENESIS	45	-0.609136	-1.63669	0.00148368	0.0246978	4826	tags=56%, list=25%, signal=42%	NDUFA13/NDUFB8/NDUFS7/NDUFAF7/NDUFA3/NDUFB7/NDUFB5/NDUFA2/NDUFAF3/NDUFB3/NDUFAF5/NDUFB9/NDUFS3/NDUFS5/TIMMDC1/NDUFS8/NDUFAF1/NDUFV3/ACAD9/NDUFB6/NDUFS2/TMEM126B/NDUFAF4/NDUFA6/NDUFA8
REACTOME_STABILIZATION_OF_P53	REACTOME_STABILIZATION_OF_P53	REACTOME_STABILIZATION_OF_P53	53	-0.608791	-1.66794	0.003003	0.0246978	3385	tags=55%, list=18%, signal=45%	PSMB7/PSMB10/PSMB4/PSMD7/PSMC4/PSMB2/PSMA2/CHEK2/PSMD9/PSMD1/PSMB3/PSMF1/PSMA4/PSMD4/PSMD12/PSMB5/PSMB1/PSME2/PSMA3/PSMB6/PSMB9/PSMC5/PSMD6/PSMC3/PSMC1/PSMC2/PSMA5/PSME3/UBB
VANTVEER_BREAST_CANCER_BRCA1_UP	VANTVEER_BREAST_CANCER_BRCA1_UP	VANTVEER_BREAST_CANCER_BRCA1_UP	39	-0.608709	-1.57449	0.00784929	0.0317868	3479	tags=54%, list=18%, signal=44%	PACSIN3/LILRB1/DNTTIP2/ATAD3A/WDR43/TRIP6/OGG1/SLC30A7/DENND1B/MYC/PUM3/UCHL5/KDM2B/RRP1/SERBP1/GLMN/RRP1B/REXO2/SLC11A2/DCAF4/GLIPR2
REACTOME_CHROMOSOME_MAINTENANCE	REACTOME_CHROMOSOME_MAINTENANCE	REACTOME_CHROMOSOME_MAINTENANCE	67	-0.607109	-1.7259	0.00145138	0.0246978	3264	tags=48%, list=17%, signal=40%	CENPC/RPA1/CHTF18/CENPO/POLD2/RPA3/CHTF8/NOP10/CENPM/CENPQ/RFC5/CENPT/ACD/CENPX/CENPI/RFC4/WRN/STN1/TERF2/OIP5/RFC2/RPA2/TERF1/MIS18BP1/GAR1/RUVBL1/POLA2/PCNA/DKC1/FEN1/BLM/CTC1
REACTOME_REGULATION_OF_RUNX3_EXPRESSION_AND_ACTIVITY	REACTOME_REGULATION_OF_RUNX3_EXPRESSION_AND_ACTIVITY	REACTOME_REGULATION_OF_RUNX3_EXPRESSION_AND_ACTIVITY	52	-0.60658	-1.65765	0.00297177	0.0246978	3765	tags=58%, list=20%, signal=47%	SRC/PSMD14/PSMB7/PSMB10/PSMB4/PSMD7/PSMC4/PSMB2/PSMA2/PSMD9/PSMD1/PSMB3/PSMF1/PSMA4/PSMD4/PSMD12/PSMB5/PSMB1/PSME2/PSMA3/PSMB6/PSMB9/PSMC5/PSMD6/PSMC3/PSMC1/PSMC2/PSMA5/PSME3/UBB
REACTOME_THE_CANONICAL_RETINOID_CYCLE_IN_RODS_TWILIGHT_VISION	REACTOME_THE_CANONICAL_RETINOID_CYCLE_IN_RODS_TWILIGHT_VISION	REACTOME_THE_CANONICAL_RETINOID_CYCLE_IN_RODS_TWILIGHT_VISION	22	-0.603771	-1.40807	0.0447284	0.106561	1656	tags=18%, list=9%, signal=17%	LRAT/CYP4V2/RDH10/NAPEPLD
REACTOME_HDR_THROUGH_HOMOLOGOUS_RECOMBINATION_HRR	REACTOME_HDR_THROUGH_HOMOLOGOUS_RECOMBINATION_HRR	REACTOME_HDR_THROUGH_HOMOLOGOUS_RECOMBINATION_HRR	60	-0.603461	-1.69008	0.00146199	0.0246978	3929	tags=50%, list=20%, signal=40%	RFC3/TOP3A/DNA2/SPIDR/SLX4/RAD51AP1/MUS81/RPA1/POLD2/BARD1/RMI1/RPA3/RFC5/RMI2/RAD17/RAD51C/RFC4/WRN/RFC2/EME1/RPA2/BRCA1/PCNA/PALB2/POLE3/BLM/UBB/RHNO1/ATRIP/POLE2
REACTOME_HIV_TRANSCRIPTION_INITIATION	REACTOME_HIV_TRANSCRIPTION_INITIATION	REACTOME_HIV_TRANSCRIPTION_INITIATION	40	-0.602296	-1.56835	0.00778816	0.0317868	4094	tags=55%, list=21%, signal=43%	GTF2H3/TAF1/POLR2F/GTF2H5/CCNH/TAF15/TAF4B/GTF2H4/GTF2F2/TAF5/POLR2A/POLR2G/TAF4/GTF2H1/ERCC2/GTF2A2/GTF2E1/GTF2H2/POLR2D/POLR2L/ERCC3/TBP
REACTOME_HDR_THROUGH_SINGLE_STRAND_ANNEALING_SSA	REACTOME_HDR_THROUGH_SINGLE_STRAND_ANNEALING_SSA	REACTOME_HDR_THROUGH_SINGLE_STRAND_ANNEALING_SSA	34	-0.600682	-1.5249	0.0108192	0.0387108	3929	tags=53%, list=20%, signal=42%	RFC3/TOP3A/DNA2/RPA1/BARD1/RMI1/RPA3/RFC5/RMI2/RAD17/RFC4/WRN/RFC2/RPA2/BRCA1/BLM/RHNO1/ATRIP
SUNG_METASTASIS_STROMA_UP	SUNG_METASTASIS_STROMA_UP	SUNG_METASTASIS_STROMA_UP	104	0.600046	1.98851	0.00367647	0.0246978	1997	tags=37%, list=10%, signal=33%	P4HA1/BNIP3L/JMY/PLOD2/PTGS2/JUNB/CRABP2/PLOD1/SDC4/SEC24D/SCD/KCNK1/HMGCS1/CNN3/SOCS5/CTDSP2/PINK1/PROS1/FHL1/CD55/COL12A1/PDIA5/CD276/VCAN/TRIO/DUSP6/MAP3K8/TKT/PLK2/CLIP2/MAPK1/CDH6/ASS1/PSD3/EIF1AY/ETV5/CD46/CALR
REACTOME_G_BETA_GAMMA_SIGNALLING_THROUGH_PI3KGAMMA	REACTOME_G_BETA_GAMMA_SIGNALLING_THROUGH_PI3KGAMMA	REACTOME_G_BETA_GAMMA_SIGNALLING_THROUGH_PI3KGAMMA	24	0.600435	1.54486	0.0240642	0.0700514	2379	tags=25%, list=12%, signal=22%	GNG8/GNG4/GNG5/GNB2/GNG11/PDPK1
STEARMAN_LUNG_CANCER_EARLY_VS_LATE_DN	STEARMAN_LUNG_CANCER_EARLY_VS_LATE_DN	STEARMAN_LUNG_CANCER_EARLY_VS_LATE_DN	58	0.60078	1.85038	0.00309598	0.0246978	2129	tags=34%, list=11%, signal=31%	SMAP2/SCD/CD68/WFDC21P/LCN2/SAT1/TCEAL9/BASP1/PDIA4/BCL2L11/SND1/IQGAP1/PIGT/CTSD/SPP1/ADAM15/SOCS3/COTL1/CAVIN1/SH3RF1
CASORELLI_ACUTE_PROMYELOCYTIC_LEUKEMIA_UP	CASORELLI_ACUTE_PROMYELOCYTIC_LEUKEMIA_UP	CASORELLI_ACUTE_PROMYELOCYTIC_LEUKEMIA_UP	147	0.601137	2.08777	0.00416667	0.0251268	1276	tags=27%, list=7%, signal=25%	NFIL3/TSC22D3/JUN/BTG1/NR4A2/FOSB/GLRX/DUSP1/HBEGF/ZFP36/AP1S2/MAP1LC3B/PER1/STK17B/SIK1/IRS2/FOS/SAP30/JAG1/NFYA/KLF6/HELZ/CITED2/MT1F/TPBG/RBMS1/IGFBP7/ZNF185/SORL1/FNDC3B/XIST/ATP1B1/CBLB/SND1/KRT18/AGTPBP1/CEBPD/CSGALNACT2/MXRA7
YAO_TEMPORAL_RESPONSE_TO_PROGESTERONE_CLUSTER_1	YAO_TEMPORAL_RESPONSE_TO_PROGESTERONE_CLUSTER_1	YAO_TEMPORAL_RESPONSE_TO_PROGESTERONE_CLUSTER_1	64	0.60201	1.86675	0.003125	0.0246978	1552	tags=33%, list=8%, signal=30%	DDIT3/NDRG1/BHLHE40/GADD45B/DUSP1/NR4A1/BCL6/IRS2/KLF9/FOXO3/CITED2/IGF1R/SAT1/IGFBP3/KRT7/XIST/BCL2L11/LEPR/MAP3K8/ZRSR2/TGFBI
NADLER_OBESITY_UP	NADLER_OBESITY_UP	NADLER_OBESITY_UP	57	0.60244	1.85306	0.00306748	0.0246978	1942	tags=28%, list=10%, signal=25%	DUSP1/MT1X/PLIN2/CD68/GRN/TPD52/BASP1/FXYD5/LGMN/PSAP/PEA15/CTSD/TLN1/IFI27/MIF/FLNA
WILLERT_WNT_SIGNALING	WILLERT_WNT_SIGNALING	WILLERT_WNT_SIGNALING	20	0.602873	1.48573	0.0459459	0.108188	1187	tags=30%, list=6%, signal=28%	SLC2A1/ING1/CITED2/CSTF1/VCAN/TLE1
CUI_GLUCOSE_DEPRIVATION	CUI_GLUCOSE_DEPRIVATION	CUI_GLUCOSE_DEPRIVATION	54	0.603454	1.84347	0.00302115	0.0246978	2304	tags=39%, list=12%, signal=34%	DDIT4/GADD45A/PIGA/ELF3/DNAJC3/CANX/GFPT1/ANLN/TXNRD1/EIF2AK3/NEU1/PDIA4/PDIA6/TGIF1/CDK1/KDELR2/ARNTL/CALR/PRKCZ/OCLN/SLC3A2
REACTOME_COLLAGEN_FORMATION	REACTOME_COLLAGEN_FORMATION	REACTOME_COLLAGEN_FORMATION	88	0.603926	1.99907	0.003367	0.0246978	2732	tags=31%, list=14%, signal=26%	P4HA1/P4HA2/LAMB3/PLOD2/COL13A1/PLOD1/PCOLCE2/P3H2/LAMC2/BMP1/ITGB4/ITGA6/LAMA3/CRTAP/COL12A1/COL6A2/SERPINH1/COL4A1/P4HB/PCOLCE/COL19A1/COL18A1/CD151/MMP20/PXDN/ADAMTS2/COL11A2
LE_EGR2_TARGETS_DN	LE_EGR2_TARGETS_DN	LE_EGR2_TARGETS_DN	97	0.604545	2.01192	0.00352113	0.0246978	2184	tags=33%, list=11%, signal=29%	NDRG1/SLC2A1/MSMO1/NR4A2/TIPARP/TGFA/MT1X/SCD/ERRFI1/NACC2/KCNK1/FDFT1/MYO1D/HMGCS1/FADS1/LIMCH1/RAP1GDS1/CD55/PIM3/PEA15/CYP51A1/FTH1/AK3/RNF13/TKT/THRSP/MBP/CD9/SLC25A1/UGT8/GFRA1/ME1
DAVICIONI_PAX_FOXO1_SIGNATURE_IN_ARMS_DN	DAVICIONI_PAX_FOXO1_SIGNATURE_IN_ARMS_DN	DAVICIONI_PAX_FOXO1_SIGNATURE_IN_ARMS_DN	20	0.604791	1.49045	0.0459459	0.108188	1638	tags=25%, list=9%, signal=23%	DUSP4/SPRY4/IGFBP3/NAP1L1/PLK2
HELLER_SILENCED_BY_METHYLATION_DN	HELLER_SILENCED_BY_METHYLATION_DN	HELLER_SILENCED_BY_METHYLATION_DN	93	0.605169	2.01449	0.0033557	0.0246978	997	tags=22%, list=5%, signal=20%	DDIT4/DDIT3/ATF3/MAFF/PPP1R15A/DNAJB9/GDF15/CLK1/DNAJB1/SEC24D/HSPA13/CHAC1/TRIB3/OSGIN1/ATF4/HSP90B1/HMOX1/DNAJB4/HBG1/UFM1
BERENJENO_TRANSFORMED_BY_RHOA_FOREVER_DN	BERENJENO_TRANSFORMED_BY_RHOA_FOREVER_DN	BERENJENO_TRANSFORMED_BY_RHOA_FOREVER_DN	27	0.605969	1.6252	0.010582	0.0382804	2081	tags=41%, list=11%, signal=36%	PTGS2/HBEGF/PLAUR/IER3/EPHA2/AKAP12/AMOT/NPNT/FLNB/TOM1L1/MGP
KEGG_ADHERENS_JUNCTION	KEGG_ADHERENS_JUNCTION	KEGG_ADHERENS_JUNCTION	72	0.606005	1.9255	0.0031746	0.0246978	2427	tags=36%, list=13%, signal=32%	CDH1/PTPRM/EGFR/CSNK2A2/PARD3/NECTIN2/WASF2/ACTB/IGF1R/RAC2/TCF7L1/ACTG1/SMAD3/RAC3/YES1/IQGAP1/FER/MAPK1/VCL/CDC42/CTNNA1/PTPRF/MAPK3/ACTN4/CSNK2A1/MAP3K7
SASAI_RESISTANCE_TO_NEOPLASTIC_TRANSFROMATION	SASAI_RESISTANCE_TO_NEOPLASTIC_TRANSFROMATION	SASAI_RESISTANCE_TO_NEOPLASTIC_TRANSFROMATION	47	0.606121	1.81126	0.00298507	0.0246978	1251	tags=23%, list=7%, signal=22%	GJB3/PLOD2/QSOX1/JUNB/RGS10/APP/DDR1/CACNB3/ATP1B1/TGFB1I1/CEBPD
MISSIAGLIA_REGULATED_BY_METHYLATION_UP	MISSIAGLIA_REGULATED_BY_METHYLATION_UP	MISSIAGLIA_REGULATED_BY_METHYLATION_UP	113	0.606542	2.05928	0.0037037	0.0246978	1355	tags=31%, list=7%, signal=29%	ATF3/P4HA2/DUSP5/PTGS2/DNAJB2/DUSP1/GADD45A/PLAUR/SERPINE1/YPEL5/MAP1LC3B/SDC4/UBE2H/KDM2A/ISG20/GRN/ISG15/LCN2/SAT1/NEU1/SPINT1/IGFBP3/PRSS8/RAB9A/ATP1B1/CD55/GSN/TMEM159/PSEN1/LGMN/PSAP/ARF4/DUSP6/HLA-E/PERP
PAL_PRMT5_TARGETS_DN	PAL_PRMT5_TARGETS_DN	PAL_PRMT5_TARGETS_DN	27	0.608212	1.63122	0.010582	0.0382804	2321	tags=33%, list=12%, signal=29%	SERPINE1/CANX/LCN2/HLA-A/PDIA6/TOB1/HLA-B/KLF10/CNR1
VERRECCHIA_RESPONSE_TO_TGFB1_C2	VERRECCHIA_RESPONSE_TO_TGFB1_C2	VERRECCHIA_RESPONSE_TO_TGFB1_C2	21	0.608425	1.52038	0.048913	0.112789	5366	tags=52%, list=28%, signal=38%	JUP/ITGB2/DVL1/CDH6/CYTH2/RHOC/RHOG/FN1/PCDHGC3/COL6A1/MMP3
HOFMANN_MYELODYSPLASTIC_SYNDROM_LOW_RISK_UP	HOFMANN_MYELODYSPLASTIC_SYNDROM_LOW_RISK_UP	HOFMANN_MYELODYSPLASTIC_SYNDROM_LOW_RISK_UP	20	0.608491	1.49957	0.0432432	0.104175	1660	tags=20%, list=9%, signal=18%	ATF3/IL1RAP/TOB2/DNM2
HALMOS_CEBPA_TARGETS_DN	HALMOS_CEBPA_TARGETS_DN	HALMOS_CEBPA_TARGETS_DN	39	0.608601	1.76083	0.00273973	0.0246978	1773	tags=36%, list=9%, signal=33%	HES1/TSC22D3/STC2/GADD45A/ELF3/CLDN4/GRB7/BCAR3/DUSP10/TOB1/TRIO/SMAD7/RBPMS/CHKA
REACTOME_CELLULAR_HEXOSE_TRANSPORT	REACTOME_CELLULAR_HEXOSE_TRANSPORT	REACTOME_CELLULAR_HEXOSE_TRANSPORT	20	0.60898	1.50078	0.0432432	0.104175	1587	tags=25%, list=8%, signal=23%	SLC2A3/SLC2A1/SLC45A3/SLC2A12/SLC2A4
BROCKE_APOPTOSIS_REVERSED_BY_IL6	BROCKE_APOPTOSIS_REVERSED_BY_IL6	BROCKE_APOPTOSIS_REVERSED_BY_IL6	140	0.609273	2.12047	0.00396825	0.0251198	1966	tags=34%, list=10%, signal=31%	SLC2A3/BHLHE40/MSMO1/MAFF/JUN/DUSP5/GADD45B/DNAJB9/PIM1/NAMPT/GADD45A/HBEGF/ZFP36/JUNB/ELL2/AP1S2/MT1X/STK17B/SIK1/BCL6/HSPA13/BCL3/TMED7/LDLR/TMF1/FOXO3/CXCR4/SBNO2/PIM2/ADIPOR2/PTPRG/MAPKAPK2/ARFGAP3/BCL2L11/ZBTB11/SPP1/TGIF1/MAP3K8/RNF13/IER2/MARCKS/TWF1/DUSP3/MCL1/SOCS3/PTPN11/GNA13/IRF4
SHI_SPARC_TARGETS_UP	SHI_SPARC_TARGETS_UP	SHI_SPARC_TARGETS_UP	24	0.609317	1.56771	0.0240642	0.0700514	2555	tags=33%, list=13%, signal=29%	DDIT3/GADD45B/PPP1R15A/ARHGAP23/MDM2/ARHGEF5/MRRF/SEMA3C
MARTORIATI_MDM4_TARGETS_NEUROEPITHELIUM_UP	MARTORIATI_MDM4_TARGETS_NEUROEPITHELIUM_UP	MARTORIATI_MDM4_TARGETS_NEUROEPITHELIUM_UP	163	0.609631	2.15042	0.00404858	0.0251198	1714	tags=29%, list=9%, signal=27%	ANKRD37/DDIT4/ADM/BNIP3/SLC2A3/P4HA1/SLC2A1/BHLHE40/ARRDC3/GPI/HK2/LDHA/EGLN1/PFKP/DUSP5/FAM162A/AK4/ALDOA/VEGFA/MT1X/PGK1/S100A10/P3H2/PTPN14/SESN2/PMAIP1/FOXO3/PFKL/TPI1/BLOC1S2/SLC19A2/PROS1/RNF169/NR6A1/SLC16A3/CALD1/EXOC4/DEF6/VCAN/PGM1/RPL36/PERP/MAP3K20/MT1E/CCNG1/PLK2/PTK7/EIF2S3
BIOCARTA_INTEGRIN_PATHWAY	BIOCARTA_INTEGRIN_PATHWAY	BIOCARTA_INTEGRIN_PATHWAY	34	0.610064	1.69852	0.0112676	0.0398116	2182	tags=38%, list=11%, signal=34%	JUN/MAP2K1/PPP1R12B/ITGB1/RAPGEF1/ZYX/CRKL/TLN1/CAV1/MAPK1/VCL/MAPK3/GRB2
GERHOLD_ADIPOGENESIS_UP	GERHOLD_ADIPOGENESIS_UP	GERHOLD_ADIPOGENESIS_UP	45	0.610098	1.78816	0.00304878	0.0246978	1883	tags=27%, list=10%, signal=24%	DDIT3/LDHA/GADD45A/VEGFA/PLIN2/SCD/MNT/BCKDHA/ACADVL/PC/ANAPC1/MCL1
BOYAULT_LIVER_CANCER_SUBCLASS_G1_DN	BOYAULT_LIVER_CANCER_SUBCLASS_G1_DN	BOYAULT_LIVER_CANCER_SUBCLASS_G1_DN	39	0.610548	1.76646	0.00273973	0.0246978	1818	tags=28%, list=9%, signal=26%	GBE1/AK2/GLRX/MBNL2/VKORC1/GADD45A/KLF9/SLC39A8/ABHD2/PRSS53/ACYP2
VANHARANTA_UTERINE_FIBROID_DN	VANHARANTA_UTERINE_FIBROID_DN	VANHARANTA_UTERINE_FIBROID_DN	60	0.610679	1.8774	0.00314465	0.0246978	1574	tags=28%, list=8%, signal=26%	NDRG1/ATF3/MAFF/NR4A2/GADD45B/NAMPT/CXADR/KLF4/BCL6/TFPI/CITED2/PDLIM1/EGR1/LEPR/HIVEP2/SMAD7/IER2
PID_DELTA_NP63_PATHWAY	PID_DELTA_NP63_PATHWAY	PID_DELTA_NP63_PATHWAY	46	0.610936	1.797	0.00308642	0.0246978	2635	tags=39%, list=14%, signal=34%	HES1/GSK3B/FOSL2/HBP1/TCF7L1/IGFBP3/SEC14L2/RAB38/CEBPD/RRAD/AXL/PERP/TOP2A/PPP2R5A/MDM2/MRE11/TBXT/KRT14
COLIN_PILOCYTIC_ASTROCYTOMA_VS_GLIOBLASTOMA_UP	COLIN_PILOCYTIC_ASTROCYTOMA_VS_GLIOBLASTOMA_UP	COLIN_PILOCYTIC_ASTROCYTOMA_VS_GLIOBLASTOMA_UP	33	0.611544	1.69247	0.0138504	0.0470935	3044	tags=33%, list=16%, signal=28%	ALDOC/SCD/RASSF2/HLA-A/EEF1A1/DNER/FTH1/TSPAN7/DKK3/CPE/NLGN2
PID_RAC1_PATHWAY	PID_RAC1_PATHWAY	PID_RAC1_PATHWAY	52	0.612034	1.85673	0.00303951	0.0246978	2038	tags=31%, list=11%, signal=28%	JUN/ATF2/CDH1/ABI2/WASF2/CYFIP2/IQGAP1/PAK2/NOXO1/ARPC2/BRK1/PIP5K1A/ABI1/CTNNA1/MAPK9/MAP2K3
MUELLER_COMMON_TARGETS_OF_AML_FUSIONS_DN	MUELLER_COMMON_TARGETS_OF_AML_FUSIONS_DN	MUELLER_COMMON_TARGETS_OF_AML_FUSIONS_DN	30	0.612217	1.68111	0.0133333	0.045877	1627	tags=20%, list=8%, signal=18%	PFKFB4/CXCL8/PIM1/SDC4/ELF4/STK3
SHAFFER_IRF4_TARGETS_IN_ACTIVATED_B_LYMPHOCYTE	SHAFFER_IRF4_TARGETS_IN_ACTIVATED_B_LYMPHOCYTE	SHAFFER_IRF4_TARGETS_IN_ACTIVATED_B_LYMPHOCYTE	71	0.612787	1.93866	0.00314465	0.0246978	1489	tags=35%, list=8%, signal=33%	ALDOC/NDRG1/HILPDA/MSMO1/INSIG1/HK2/LDHA/VEGFA/ELL2/ST3GAL1/PGK1/SCD/OSBPL8/FDFT1/LDLR/CANX/FADS1/KTN1/MVK/UAP1/SQLE/CYP51A1/PAM/HIVEP2/CAV1
GRAHAM_CML_QUIESCENT_VS_CML_DIVIDING_UP	GRAHAM_CML_QUIESCENT_VS_CML_DIVIDING_UP	GRAHAM_CML_QUIESCENT_VS_CML_DIVIDING_UP	22	0.6131	1.5494	0.0345745	0.0897685	269	tags=14%, list=1%, signal=13%	JUN/CXCL8/EMP1
SPIRA_SMOKERS_LUNG_CANCER_UP	SPIRA_SMOKERS_LUNG_CANCER_UP	SPIRA_SMOKERS_LUNG_CANCER_UP	37	0.613179	1.74299	0.0027933	0.0246978	2438	tags=49%, list=13%, signal=43%	CXCL8/SOX9/FOS/TPD52/UGCG/SLC39A8/FXR1/PPBP/CD55/TOB1/DUSP6/AIDA/TWF1/C6/ATP6AP2/DMD/YWHAE/TMED2
SAGIV_CD24_TARGETS_DN	SAGIV_CD24_TARGETS_DN	SAGIV_CD24_TARGETS_DN	44	0.613483	1.77991	0.00304878	0.0246978	1489	tags=34%, list=8%, signal=32%	ATF3/GEM/DUSP5/CXCL8/PPP1R15A/FOXD1/GDF15/CHAC1/TUFT1/ISG20/TRIM8/CST6/EMP3/PDGFB/CAV1
CHEN_ETV5_TARGETS_SERTOLI	CHEN_ETV5_TARGETS_SERTOLI	CHEN_ETV5_TARGETS_SERTOLI	25	0.613724	1.60558	0.0187668	0.0588368	4165	tags=32%, list=22%, signal=25%	ARID3B/CEMIP/XIST/IL6/CXCL6/FCGR2B/CXCL12/IGFBP4
REACTOME_FOXO_MEDIATED_TRANSCRIPTION	REACTOME_FOXO_MEDIATED_TRANSCRIPTION	REACTOME_FOXO_MEDIATED_TRANSCRIPTION	63	0.613727	1.89532	0.00314465	0.0246978	1852	tags=29%, list=10%, signal=26%	DDIT3/BTG1/GADD45A/CDKN1B/CCNG2/KLF4/BCL6/NFYA/FOXO3/CITED2/PINK1/SMAD3/SIN3A/BCL2L11/BBC3/CAV1/PCBP4/FBXO32
REACTOME_ADP_SIGNALLING_THROUGH_P2Y_PURINOCEPTOR_12	REACTOME_ADP_SIGNALLING_THROUGH_P2Y_PURINOCEPTOR_12	REACTOME_ADP_SIGNALLING_THROUGH_P2Y_PURINOCEPTOR_12	22	0.614526	1.553	0.0345745	0.0897685	2247	tags=27%, list=12%, signal=24%	GNG8/GNAI3/GNG4/GNG5/GNB2/GNG11
WOO_LIVER_CANCER_RECURRENCE_UP	WOO_LIVER_CANCER_RECURRENCE_UP	WOO_LIVER_CANCER_RECURRENCE_UP	100	0.614905	2.05725	0.00359712	0.0246978	2272	tags=31%, list=12%, signal=27%	DDIT3/PDGFA/HK2/GEM/ENO2/PFKP/CXCL8/QSOX1/ALDOA/PLAUR/SOX9/RGS10/JAG1/TPBG/DUSP4/GPC4/DDR1/FGD6/IGFBP3/DPYSL2/RHOF/TPM2/PKM/MARCKS/UBR5/EXT1/FLNA/MGP/LAMA4/MAB21L2/DPYSL3
PID_UPA_UPAR_PATHWAY	PID_UPA_UPAR_PATHWAY	PID_UPA_UPAR_PATHWAY	39	0.615446	1.78064	0.00273973	0.0246978	1252	tags=21%, list=7%, signal=19%	PLAUR/SERPINE1/EGFR/ITGB5/ITGA5/ITGB1/PDGFD/ITGB2
SCIAN_INVERSED_TARGETS_OF_TP53_AND_TP73_DN	SCIAN_INVERSED_TARGETS_OF_TP53_AND_TP73_DN	SCIAN_INVERSED_TARGETS_OF_TP53_AND_TP73_DN	28	0.615468	1.66834	0.00813008	0.0317868	1799	tags=36%, list=9%, signal=32%	ATF3/BHLHE40/BTG1/PLS3/EIF1/KLF9/BASP1/CELF1/NFKB2/HNRNPA3
HUANG_DASATINIB_RESISTANCE_UP	HUANG_DASATINIB_RESISTANCE_UP	HUANG_DASATINIB_RESISTANCE_UP	77	0.615591	1.97769	0.003367	0.0246978	1984	tags=44%, list=10%, signal=40%	LAMB3/EGFR/ELL2/EPHA2/RIPK4/SH3KBP1/CAST/P3H2/JAG1/ITGA5/TFPI/SOCS5/RAC2/FXYD5/ELK3/DUSP10/CCDC50/CALD1/PPP1R18/PARVA/ZYX/NNMT/PGM1/F3/CAV1/TGFBI/UBE2E3/PDGFC/EXT1/COTL1/ANTXR2/CAVIN1/AKR1C3/LAYN
MARSON_FOXP3_TARGETS_UP	MARSON_FOXP3_TARGETS_UP	MARSON_FOXP3_TARGETS_UP	63	0.615804	1.90173	0.00314465	0.0246978	1883	tags=29%, list=10%, signal=26%	DDIT4/SLC2A3/MBNL2/CD2/ETS1/RSRP1/PLIN2/S100A10/MKNK2/RAC2/VIM/BASP1/ITM2C/SERINC3/MYH9/CD24/HNRNPLL/MCL1
ALTEMEIER_RESPONSE_TO_LPS_WITH_MECHANICAL_VENTILATION	ALTEMEIER_RESPONSE_TO_LPS_WITH_MECHANICAL_VENTILATION	ALTEMEIER_RESPONSE_TO_LPS_WITH_MECHANICAL_VENTILATION	110	0.616291	2.08101	0.00371747	0.0246978	1961	tags=25%, list=10%, signal=23%	ADM/ATF3/NFIL3/MXD1/MAFF/PLAUR/SERPINE1/JUNB/ST3GAL1/PFKFB3/AKAP12/MT1X/BCL3/SAP30/RAB20/TNFSF9/ISG15/ARG2/IRF7/VCAN/CEBPD/MAP3K8/MT1E/F3/IL6/GDA/SOCS3/TNFAIP3
BRACHAT_RESPONSE_TO_CAMPTOTHECIN_DN	BRACHAT_RESPONSE_TO_CAMPTOTHECIN_DN	BRACHAT_RESPONSE_TO_CAMPTOTHECIN_DN	40	0.616333	1.78535	0.00277778	0.0246978	2037	tags=32%, list=11%, signal=29%	GPI/BNIP3L/AK4/ALDOA/PDK3/GAPDH/TAX1BP1/HMGCS1/CDK1/BAD/MT1E/SLC25A1/ADPRM
WU_CELL_MIGRATION	WU_CELL_MIGRATION	WU_CELL_MIGRATION	172	0.616899	2.19494	0.00414938	0.0251268	1972	tags=37%, list=10%, signal=33%	GJB3/IGFBP6/PTGS2/CDH1/CXADR/SERPINE1/AKAP12/MT1X/SOX9/NR2F2/PLIN2/CDA/EPAS1/FBLN1/KCNK1/JAG1/CLDN4/MT1F/LIMCH1/ESRP1/IGFBP7/JUP/RAC2/CLDN7/VIM/PTGER4/SPINT1/UGCG/MT2A/IGFBP3/KRT7/ITGB4/LAMA3/TM4SF1/WWTR1/CST6/EMP3/CD55/CDH3/KRT18/FOSL1/VCAN/NNMT/COL6A2/MAOA/TPM2/IGF2BP2/RAB25/AXL/PPL/PERP/MT1E/CTSH/SH3YL1/TGFBI/COL4A1/CD24/RBPMS/TGM2/RNF128/PDGFC/AKR1C3/S100A14
REACTOME_NGF_STIMULATED_TRANSCRIPTION	REACTOME_NGF_STIMULATED_TRANSCRIPTION	REACTOME_NGF_STIMULATED_TRANSCRIPTION	37	0.617523	1.75534	0.0027933	0.0246978	1874	tags=43%, list=10%, signal=39%	FOSB/ATF2/JUNB/VGF/FOS/ELK1/EGR1/MEF2D/FOSL1/NAB2/NAB1/RRAD/F3/TCF12/DNM2/EGR2
SWEET_KRAS_TARGETS_UP	SWEET_KRAS_TARGETS_UP	SWEET_KRAS_TARGETS_UP	77	0.617634	1.98425	0.003367	0.0246978	2620	tags=38%, list=14%, signal=33%	BHLHE40/P4HA2/JUN/GADD45B/DNAJB2/SERPINE1/JUNB/GABARAPL1/INPP4B/CLDN4/TUFT1/FERMT2/IGFBP7/IGFBP3/BMP1/LAMP2/CALD1/NUAK1/NCK2/MAP3K8/TGFBI/COL4A1/WASHC3/LBH/PGLS/JAK1/PMEPA1/SNAI1/DKK3
REACTOME_PRESYNAPTIC_FUNCTION_OF_KAINATE_RECEPTORS	REACTOME_PRESYNAPTIC_FUNCTION_OF_KAINATE_RECEPTORS	REACTOME_PRESYNAPTIC_FUNCTION_OF_KAINATE_RECEPTORS	21	0.618133	1.54464	0.0434783	0.104666	2368	tags=29%, list=12%, signal=25%	GNG8/GNG4/GNG5/GNB2/GNG11/PLCB1
GRAHAM_NORMAL_QUIESCENT_VS_NORMAL_DIVIDING_UP	GRAHAM_NORMAL_QUIESCENT_VS_NORMAL_DIVIDING_UP	GRAHAM_NORMAL_QUIESCENT_VS_NORMAL_DIVIDING_UP	52	0.618688	1.87691	0.00303951	0.0246978	1709	tags=27%, list=9%, signal=25%	MAFF/NR4A2/PTGS2/EMP1/FNBP1/MPZL2/TFPI/TPBG/OPTN/FXR1/TM4SF1/TGFB1I1/FTH1/RBPMS
MAHADEVAN_IMATINIB_RESISTANCE_UP	MAHADEVAN_IMATINIB_RESISTANCE_UP	MAHADEVAN_IMATINIB_RESISTANCE_UP	20	0.618833	1.52506	0.0432432	0.104175	5212	tags=65%, list=27%, signal=47%	NNMT/AXL/CD24/SLC1A1/PDGFC/DKK3/MYO10/CRIM1/SPANXC/BAMBI/HSD17B2/SCN3A/CXCL14
REACTOME_ADP_SIGNALLING_THROUGH_P2Y_PURINOCEPTOR_1	REACTOME_ADP_SIGNALLING_THROUGH_P2Y_PURINOCEPTOR_1	REACTOME_ADP_SIGNALLING_THROUGH_P2Y_PURINOCEPTOR_1	25	0.618996	1.61937	0.0160858	0.0527082	2247	tags=24%, list=12%, signal=21%	GNG8/GNG4/GNAQ/GNG5/GNB2/GNG11
FARMER_BREAST_CANCER_CLUSTER_7	FARMER_BREAST_CANCER_CLUSTER_7	FARMER_BREAST_CANCER_CLUSTER_7	20	0.619452	1.52658	0.0432432	0.104175	2432	tags=40%, list=13%, signal=35%	CDH1/SCD/SLC35A3/TMEM135/DHRS2/TRIM36/GSE1/BLVRB
REACTOME_G_BETA_GAMMA_SIGNALLING_THROUGH_CDC42	REACTOME_G_BETA_GAMMA_SIGNALLING_THROUGH_CDC42	REACTOME_G_BETA_GAMMA_SIGNALLING_THROUGH_CDC42	20	0.620972	1.53033	0.0432432	0.104175	2247	tags=30%, list=12%, signal=27%	GNG8/GNG4/CDC42/GNG5/GNB2/GNG11
FLOTHO_PEDIATRIC_ALL_THERAPY_RESPONSE_UP	FLOTHO_PEDIATRIC_ALL_THERAPY_RESPONSE_UP	FLOTHO_PEDIATRIC_ALL_THERAPY_RESPONSE_UP	48	0.62166	1.8555	0.003003	0.0246978	2438	tags=33%, list=13%, signal=29%	NDRG1/CD34/EMP1/MACO1/RPL22/FXYD5/ITGA6/AKAP13/TPT1/RPL7/TBC1D15/MXRA7/RPLP0/KLF10/RSL24D1/TMED2
DOANE_BREAST_CANCER_CLASSES_DN	DOANE_BREAST_CANCER_CLASSES_DN	DOANE_BREAST_CANCER_CLASSES_DN	30	0.622013	1.708	0.008	0.0317868	1423	tags=30%, list=7%, signal=28%	PLOD2/PLAUR/ARTN/PMAIP1/WWTR1/CALU/DSC2/SPP1/WDR33
PARK_TRETINOIN_RESPONSE_AND_RARA_PLZF_FUSION	PARK_TRETINOIN_RESPONSE_AND_RARA_PLZF_FUSION	PARK_TRETINOIN_RESPONSE_AND_RARA_PLZF_FUSION	21	0.623018	1.55685	0.0353261	0.0908021	180	tags=24%, list=1%, signal=24%	NDRG1/PIM1/IER3/TLE3/ST3GAL1
SMIRNOV_CIRCULATING_ENDOTHELIOCYTES_IN_CANCER_UP	SMIRNOV_CIRCULATING_ENDOTHELIOCYTES_IN_CANCER_UP	SMIRNOV_CIRCULATING_ENDOTHELIOCYTES_IN_CANCER_UP	135	0.624049	2.16865	0.00393701	0.025039	1885	tags=29%, list=10%, signal=26%	ADM/SLC2A3/BHLHE40/MAFF/INSIG1/CXCL8/RRAGD/QSOX1/HBEGF/VEGFA/IER3/PFKFB3/PLIN2/CDA/EPAS1/SLCO4A1/DUSP4/EGR1/HMOX1/GAB2/MPP1/IGFBP3/PROS1/PPBP/MAPK7/SCML1/ELF4/NOD2/PERP/PPARD/SC5D/HPSE/SMAD7/RAB13/TGFBI/TMBIM1/RARA/CHKA/CD9
WANG_LSD1_TARGETS_DN	WANG_LSD1_TARGETS_DN	WANG_LSD1_TARGETS_DN	36	0.625021	1.76398	0.00284091	0.0246978	1874	tags=28%, list=10%, signal=25%	BTG1/GADD45A/JUNB/FOS/SYT1/STXBP1/EGR1/SYN2/POLR3D/EGR2
SCHAEFFER_PROSTATE_DEVELOPMENT_12HR_UP	SCHAEFFER_PROSTATE_DEVELOPMENT_12HR_UP	SCHAEFFER_PROSTATE_DEVELOPMENT_12HR_UP	102	0.625237	2.09047	0.00361011	0.0246978	1251	tags=25%, list=7%, signal=24%	BNIP3/SLC2A1/MAFF/TMEM45A/CDH1/SOX9/PGK1/BCL6/ERRFI1/AHNAK/PMAIP1/NT5E/KLF9/PGAM1/ZFAS1/FNDC3B/PROS1/SLC39A8/IGFBP2/ITGB4/DNER/LAMP2/ATP1A1/PDGFD/TLE1/CEBPD
REACTOME_GLUTAMATE_NEUROTRANSMITTER_RELEASE_CYCLE	REACTOME_GLUTAMATE_NEUROTRANSMITTER_RELEASE_CYCLE	REACTOME_GLUTAMATE_NEUROTRANSMITTER_RELEASE_CYCLE	23	0.625524	1.59177	0.0213904	0.0646932	1800	tags=26%, list=9%, signal=24%	PPFIA1/SYT1/STXBP1/RAB3A/SLC1A1/PPFIA4
VARELA_ZMPSTE24_TARGETS_UP	VARELA_ZMPSTE24_TARGETS_UP	VARELA_ZMPSTE24_TARGETS_UP	39	0.627124	1.81442	0.00273973	0.0246978	1113	tags=28%, list=6%, signal=27%	DDIT4/ATF3/GADD45B/GADD45A/NR1D1/ATF4/MKNK2/MAPKAPK2/KLF3/LEPR/PIM3
PID_SYNDECAN_4_PATHWAY	PID_SYNDECAN_4_PATHWAY	PID_SYNDECAN_4_PATHWAY	32	0.627305	1.72529	0.00821918	0.0318739	1660	tags=31%, list=9%, signal=29%	SDC4/ITGA5/TFPI/CXCR4/SDCBP/ITGB1/LAMA3/MDK/PRKCA/DNM2
PID_NFAT_TFPATHWAY	PID_NFAT_TFPATHWAY	PID_NFAT_TFPATHWAY	44	0.627927	1.82181	0.00304878	0.0246978	1966	tags=34%, list=10%, signal=31%	JUN/CXCL8/PTGS2/JUNB/FOS/EGR1/IL3/CBLB/FOSL1/POU2F1/NFATC1/TBX21/RNF128/EGR2/IRF4
REACTOME_ATF4_ACTIVATES_GENES_IN_RESPONSE_TO_ENDOPLASMIC_RETICULUM_STRESS	REACTOME_ATF4_ACTIVATES_GENES_IN_RESPONSE_TO_ENDOPLASMIC_RETICULUM_STRESS	REACTOME_ATF4_ACTIVATES_GENES_IN_RESPONSE_TO_ENDOPLASMIC_RETICULUM_STRESS	25	0.628099	1.64319	0.0160858	0.0527082	339	tags=24%, list=2%, signal=24%	HERPUD1/DDIT3/ATF3/CXCL8/ATF4/NFYA
PID_PDGFRA_PATHWAY	PID_PDGFRA_PATHWAY	PID_PDGFRA_PATHWAY	21	0.629363	1.57271	0.0298913	0.0814074	2490	tags=52%, list=13%, signal=46%	JUN/SHB/FOS/ELK1/RAPGEF1/CRKL/CAV1/GRB2/CSNK2A1/JAK1/CRK
HESS_TARGETS_OF_HOXA9_AND_MEIS1_DN	HESS_TARGETS_OF_HOXA9_AND_MEIS1_DN	HESS_TARGETS_OF_HOXA9_AND_MEIS1_DN	72	0.630775	2.00421	0.0031746	0.0246978	2822	tags=38%, list=15%, signal=32%	NDRG1/DUSP1/CDH1/ZFP36/KLF4/FOS/ARG2/LCN2/EGR1/TPD52/CAMK2D/PSAP/VCAN/TGFBI/MYADM/CPT1A/FGR/EGR2/MCL1/ZFP36L1/LSP1/UPP1/CSF1R/CA4/GRK5/MSR1/IL1R2
TING_SILENCED_BY_DICER	TING_SILENCED_BY_DICER	TING_SILENCED_BY_DICER	27	0.63143	1.69349	0.010582	0.0382804	1309	tags=22%, list=7%, signal=21%	PANK3/CXCR4/VIM/TM4SF1/DHRS2/LHFPL6
ABE_VEGFA_TARGETS_30MIN	ABE_VEGFA_TARGETS_30MIN	ABE_VEGFA_TARGETS_30MIN	26	0.632072	1.67417	0.0157895	0.0521122	1874	tags=27%, list=10%, signal=24%	DUSP5/PTGS2/HBEGF/NR4A1/EGR1/AURKC/EGR2
GRAHAM_CML_QUIESCENT_VS_NORMAL_QUIESCENT_DN	GRAHAM_CML_QUIESCENT_VS_NORMAL_QUIESCENT_DN	GRAHAM_CML_QUIESCENT_VS_NORMAL_QUIESCENT_DN	41	0.63229	1.8312	0.00284091	0.0246978	1759	tags=32%, list=9%, signal=29%	IDS/EMP1/MPZL2/APP/LIMCH1/SORL1/FHL1/TM4SF1/TGFB1I1/DUSP6/TSPAN6/RBPMS/AIF1
ADDYA_ERYTHROID_DIFFERENTIATION_BY_HEMIN	ADDYA_ERYTHROID_DIFFERENTIATION_BY_HEMIN	ADDYA_ERYTHROID_DIFFERENTIATION_BY_HEMIN	71	0.632698	2.00165	0.00314465	0.0246978	962	tags=27%, list=5%, signal=26%	HERPUD1/DDIT4/ATF3/INSIG1/JUN/HSPA5/CXCL8/PIM1/IER3/ITGB5/OSGIN1/NFYA/TAX1BP1/KLF6/TXNRD1/EGR1/DNAJB4/MT2A/YES1
LIU_TARGETS_OF_VMYB_VS_CMYB_DN	LIU_TARGETS_OF_VMYB_VS_CMYB_DN	LIU_TARGETS_OF_VMYB_VS_CMYB_DN	39	0.632857	1.83101	0.00273973	0.0246978	2952	tags=28%, list=15%, signal=24%	TSC22D3/FAM107B/CHSY1/MAPKAPK2/TM4SF1/VCAN/IL6/KLF5/CDC42SE2/ARHGAP24/PALLD
ZHAN_MULTIPLE_MYELOMA_HP_UP	ZHAN_MULTIPLE_MYELOMA_HP_UP	ZHAN_MULTIPLE_MYELOMA_HP_UP	44	0.633235	1.83721	0.00304878	0.0246978	2336	tags=39%, list=12%, signal=34%	SCAPER/THG1L/ISL2/POLR1D/ZFAS1/SNHG7/FCHSD2/SEMA4D/SCYL2/IPO7/CSNK1G3/CDV3/VPS51/EIF3F/FRZB/GNG11/OAS2
BRACHAT_RESPONSE_TO_METHOTREXATE_DN	BRACHAT_RESPONSE_TO_METHOTREXATE_DN	BRACHAT_RESPONSE_TO_METHOTREXATE_DN	25	0.633581	1.65753	0.0160858	0.0527082	407	tags=28%, list=2%, signal=27%	GPI/BNIP3L/AK4/ALDOA/PDK3/GAPDH/HMGCS1
JEON_SMAD6_TARGETS_UP	JEON_SMAD6_TARGETS_UP	JEON_SMAD6_TARGETS_UP	24	0.635183	1.63426	0.013369	0.045877	1303	tags=29%, list=7%, signal=27%	JUN/CXCL8/QSOX1/SERPINE1/LAMC2/TRIO/SERPINH1
HUI_MAPK14_TARGETS_UP	HUI_MAPK14_TARGETS_UP	HUI_MAPK14_TARGETS_UP	17	0.635374	1.52708	0.0478589	0.111221	1256	tags=29%, list=7%, signal=28%	JUN/GADD45A/ISG15/FHL1/DUSP8
ONO_AML1_TARGETS_UP	ONO_AML1_TARGETS_UP	ONO_AML1_TARGETS_UP	22	0.635475	1.60594	0.018617	0.0586394	273	tags=14%, list=1%, signal=13%	JUN/GADD45B/FOS
PEDERSEN_TARGETS_OF_611CTF_ISOFORM_OF_ERBB2	PEDERSEN_TARGETS_OF_611CTF_ISOFORM_OF_ERBB2	PEDERSEN_TARGETS_OF_611CTF_ISOFORM_OF_ERBB2	72	0.635497	2.01921	0.0031746	0.0246978	2006	tags=40%, list=10%, signal=36%	ANGPTL4/HK2/PLOD2/COL13A1/PLAUR/EGFR/IDS/TGFA/TSC22D2/ITGA5/NT5E/ISG20/TFPI/ZNF185/ITGB1/ADAM9/WWTR1/ENTPD3/TNFAIP8/SLC12A6/DSC2/FAM131B/IGF2BP2/LHFPL6/SH2D3A/UBE2E3/ANKRD22/CAVIN1/MEAK7
TUOMISTO_TUMOR_SUPPRESSION_BY_COL13A1_UP	TUOMISTO_TUMOR_SUPPRESSION_BY_COL13A1_UP	TUOMISTO_TUMOR_SUPPRESSION_BY_COL13A1_UP	20	0.635683	1.56659	0.0378378	0.095249	2877	tags=25%, list=15%, signal=21%	MT1X/LAMA3/RPL14/ARNTL/SERPINA1
REACTOME_DOPAMINE_NEUROTRANSMITTER_RELEASE_CYCLE	REACTOME_DOPAMINE_NEUROTRANSMITTER_RELEASE_CYCLE	REACTOME_DOPAMINE_NEUROTRANSMITTER_RELEASE_CYCLE	23	0.636807	1.62049	0.0213904	0.0646932	1800	tags=30%, list=9%, signal=28%	PPFIA1/CASK/SYT1/STXBP1/RAB3A/SYN2/PPFIA4
DELACROIX_RAR_TARGETS_UP	DELACROIX_RAR_TARGETS_UP	DELACROIX_RAR_TARGETS_UP	43	0.63686	1.85232	0.00295858	0.0246978	1773	tags=28%, list=9%, signal=25%	BHLHE40/DUSP1/JUNB/CRABP2/SAT1/PRSS8/TM4SF1/CA12/DUSP6/CP/SKIL/CHKA
REACTOME_SCAVENGING_BY_CLASS_A_RECEPTORS	REACTOME_SCAVENGING_BY_CLASS_A_RECEPTORS	REACTOME_SCAVENGING_BY_CLASS_A_RECEPTORS	19	0.637236	1.54966	0.0352304	0.0906957	2737	tags=32%, list=14%, signal=27%	HSP90B1/FTL/FTH1/COL4A1/CALR/MSR1
KEGG_STARCH_AND_SUCROSE_METABOLISM	KEGG_STARCH_AND_SUCROSE_METABOLISM	KEGG_STARCH_AND_SUCROSE_METABOLISM	48	0.637382	1.90243	0.003003	0.0246978	2951	tags=33%, list=15%, signal=28%	GBE1/GPI/HK2/HK1/UGP2/UGDH/GUSB/PGM1/GYS1/UGT2B15/UGT2B11/HK3/PYGL/GAA/UGT1A3/UGT1A9
SHAFFER_IRF4_TARGETS_IN_ACTIVATED_DENDRITIC_CELL	SHAFFER_IRF4_TARGETS_IN_ACTIVATED_DENDRITIC_CELL	SHAFFER_IRF4_TARGETS_IN_ACTIVATED_DENDRITIC_CELL	55	0.637849	1.95714	0.00301205	0.0246978	2057	tags=38%, list=11%, signal=34%	MSMO1/DUSP5/DNAJB9/ELL2/ISG20/CANX/GFPT1/FADS1/HSP90B1/PDIA4/ANKZF1/UAP1/PIM2/FHL1/DDHD2/HIVEP2/CAV1/TCERG1/TNFAIP3/IRF4/RAB30
KEGG_GLYCOLYSIS_GLUCONEOGENESIS	KEGG_GLYCOLYSIS_GLUCONEOGENESIS	KEGG_GLYCOLYSIS_GLUCONEOGENESIS	58	0.638903	1.96779	0.00309598	0.0246978	643	tags=26%, list=3%, signal=25%	ALDOC/GPI/HK2/LDHA/ENO2/PFKP/ALDOA/HK1/GAPDH/ACSS2/PGAM4/PGK1/PGAM1/PFKL/TPI1
PID_RHOA_PATHWAY	PID_RHOA_PATHWAY	PID_RHOA_PATHWAY	42	0.63914	1.85647	0.00293255	0.0246978	3233	tags=52%, list=17%, signal=44%	JUN/ATF2/CDKN1B/FOS/SCAI/ITGB1/PPP1R12A/TLN1/PTEN/VCL/CDC42/PIP5K1A/PLD2/MAP2K3/PRKCZ/DIAPH1/MYL2/PKN1/SLC9A3/RDX/ROCK1/MAPK8
GENTILE_UV_RESPONSE_CLUSTER_D1	GENTILE_UV_RESPONSE_CLUSTER_D1	GENTILE_UV_RESPONSE_CLUSTER_D1	17	0.639369	1.53668	0.0478589	0.111221	814	tags=35%, list=4%, signal=34%	DDIT4/GEM/DUSP1/RND3/ASPH/ITGA6
FRIDMAN_SENESCENCE_UP	FRIDMAN_SENESCENCE_UP	FRIDMAN_SENESCENCE_UP	70	0.639545	2.0137	0.00309598	0.0246978	2038	tags=41%, list=11%, signal=37%	ING1/CDKN1C/IGFBP6/SERPINE1/MAP1LC3B/CDKN2D/NME2/CITED2/ISG15/RRAS/IGFBP7/VIM/GUK1/IGFBP3/CREG1/IGFBP2/TES/IRF7/OPTN/GSN/TGFB1I1/PEA15/RAB5B/TFAP2A/F3/RAB13/TNFAIP3/MDM2/MAP2K3
SHIN_B_CELL_LYMPHOMA_CLUSTER_7	SHIN_B_CELL_LYMPHOMA_CLUSTER_7	SHIN_B_CELL_LYMPHOMA_CLUSTER_7	26	0.639683	1.69432	0.0131579	0.045527	2709	tags=50%, list=14%, signal=43%	CDKN1C/GSK3B/ZFP36/BCL6/IGF1R/BAD/DVL1/PTEN/NOTCH3/TRAF4/RB1/PTCH1/MAX
TIAN_TNF_SIGNALING_VIA_NFKB	TIAN_TNF_SIGNALING_VIA_NFKB	TIAN_TNF_SIGNALING_VIA_NFKB	22	0.639939	1.61723	0.018617	0.0586394	1961	tags=41%, list=10%, signal=37%	CXCL8/PTGS2/TNIP1/ZFP36/SDC4/NFKB2/PLK2/IL6/TNFAIP3
REACTOME_PERK_REGULATES_GENE_EXPRESSION	REACTOME_PERK_REGULATES_GENE_EXPRESSION	REACTOME_PERK_REGULATES_GENE_EXPRESSION	29	0.64009	1.75441	0.00802139	0.0317868	513	tags=28%, list=3%, signal=27%	HERPUD1/DDIT3/ATF3/HSPA5/CXCL8/ATF4/NFYA/EIF2AK3
PID_P38_ALPHA_BETA_DOWNSTREAM_PATHWAY	PID_P38_ALPHA_BETA_DOWNSTREAM_PATHWAY	PID_P38_ALPHA_BETA_DOWNSTREAM_PATHWAY	37	0.641615	1.82382	0.0027933	0.0246978	875	tags=24%, list=5%, signal=23%	DDIT3/JUN/PTGS2/ATF2/CSNK2A2/RAB5A/HBP1/ELK4/MAPKAPK2
SA_B_CELL_RECEPTOR_COMPLEXES	SA_B_CELL_RECEPTOR_COMPLEXES	SA_B_CELL_RECEPTOR_COMPLEXES	24	0.641696	1.65101	0.013369	0.045877	2731	tags=50%, list=14%, signal=43%	JUN/ATF2/MAP2K1/FOS/ELK1/MAPK1/MAPK3/MAPK8IP3/GRB2/LYN/BLNK/HRAS
ONO_FOXP3_TARGETS_UP	ONO_FOXP3_TARGETS_UP	ONO_FOXP3_TARGETS_UP	23	0.642332	1.63454	0.0160428	0.0527082	273	tags=13%, list=1%, signal=13%	JUN/GADD45B/FOS
REACTOME_ESTROGEN_DEPENDENT_NUCLEAR_EVENTS_DOWNSTREAM_OF_ESR_MEMBRANE_SIGNALING	REACTOME_ESTROGEN_DEPENDENT_NUCLEAR_EVENTS_DOWNSTREAM_OF_ESR_MEMBRANE_SIGNALING	REACTOME_ESTROGEN_DEPENDENT_NUCLEAR_EVENTS_DOWNSTREAM_OF_ESR_MEMBRANE_SIGNALING	20	0.642711	1.5839	0.0297297	0.081166	473	tags=35%, list=2%, signal=34%	HBEGF/EGFR/CDKN1B/TGFA/FOS/FOXO3/ELK1
CROONQUIST_NRAS_SIGNALING_UP	CROONQUIST_NRAS_SIGNALING_UP	CROONQUIST_NRAS_SIGNALING_UP	35	0.642824	1.81505	0.00275482	0.0246978	1343	tags=26%, list=7%, signal=24%	OSBPL1A/NRAS/SV2B/LGALS1/PLPP1/SDCBP/ELF4/DUSP6/TUBB2A
BIOCARTA_INSULIN_PATHWAY	BIOCARTA_INSULIN_PATHWAY	BIOCARTA_INSULIN_PATHWAY	19	0.643118	1.56397	0.0325203	0.0865898	2731	tags=58%, list=14%, signal=50%	JUN/MAP2K1/FOS/ELK1/SLC2A4/PTPN11/MAPK3/IRS1/GRB2/CSNK2A1/HRAS
HEDENFALK_BREAST_CANCER_BRACX_UP	HEDENFALK_BREAST_CANCER_BRACX_UP	HEDENFALK_BREAST_CANCER_BRACX_UP	19	0.644039	1.56621	0.0325203	0.0865898	1890	tags=26%, list=10%, signal=24%	SPRY1/JUNB/RPS4X/COL6A2/KDM6A
HENDRICKS_SMARCA4_TARGETS_UP	HENDRICKS_SMARCA4_TARGETS_UP	HENDRICKS_SMARCA4_TARGETS_UP	52	0.644251	1.95447	0.00303951	0.0246978	1490	tags=29%, list=8%, signal=27%	JUN/FHL2/GADD45A/KRT15/UBE2H/ITGA5/AHNAK/FOSL2/LGALS1/EMP3/LMNA/PERP/ABHD2/FLNB/CTSH
GERY_CEBP_TARGETS	GERY_CEBP_TARGETS	GERY_CEBP_TARGETS	118	0.644673	2.20501	0.00374532	0.0246978	576	tags=25%, list=3%, signal=24%	ANGPTL4/DDIT3/ATF3/TMEM45A/GLRX/GADD45B/PPP1R15A/DNAJB9/PIM1/DNAJB2/FHL2/DUSP1/HBEGF/PLAUR/JUNB/DBP/CRABP2/DNAJB1/NR1D1/KLF4/FOS/TRIB3/CD68/WFDC21P/MKNK2/LCN2/SAT1/RDH11/HMOX1
MALTA_CURATED_STEMNESS_MARKERS	MALTA_CURATED_STEMNESS_MARKERS	MALTA_CURATED_STEMNESS_MARKERS	18	0.644807	1.54348	0.037234	0.0945418	270	tags=17%, list=1%, signal=16%	CD34/KLF4/EPAS1
WINTER_HYPOXIA_UP	WINTER_HYPOXIA_UP	WINTER_HYPOXIA_UP	89	0.645179	2.14671	0.00333333	0.0246978	1096	tags=34%, list=6%, signal=32%	ANGPTL4/ANKRD37/BNIP3/NDRG1/P4HA1/SLC2A1/PFKFB4/CA9/HILPDA/LDHA/CXCL8/AK4/ALDOA/VEGFA/SLCO1B3/GAPDH/PGK1/S100A10/LDLR/ANLN/TPBG/VEZT/PGAM1/RNF24/TPI1/MRGBP/TANC2/ANKRD9/TMEM189/CA12
MARTINEZ_RESPONSE_TO_TRABECTEDIN	MARTINEZ_RESPONSE_TO_TRABECTEDIN	MARTINEZ_RESPONSE_TO_TRABECTEDIN	49	0.645433	1.91764	0.003125	0.0246978	3528	tags=49%, list=18%, signal=40%	GBE1/NCOR2/UVRAG/SORL1/SMAD3/PTPRG/GNAQ/SND1/NUMB/ADK/KIFAP3/TCF12/STK3/EXT1/DOCK1/CUX1/IRS1/ME1/ID1/PPARG/MGMT/ROR1/HMGA2/ALCAM
BROWNE_HCMV_INFECTION_2HR_UP	BROWNE_HCMV_INFECTION_2HR_UP	BROWNE_HCMV_INFECTION_2HR_UP	35	0.645677	1.8231	0.00275482	0.0246978	1361	tags=23%, list=7%, signal=21%	ATF3/NR4A2/CXCL8/NR4A1/FOS/EGR1/NR4A3/MAP3K8
SUBTIL_PROGESTIN_TARGETS	SUBTIL_PROGESTIN_TARGETS	SUBTIL_PROGESTIN_TARGETS	31	0.645717	1.76873	0.00547945	0.0270189	755	tags=32%, list=4%, signal=31%	BNIP3/ATF3/JUN/CDKN1C/DUSP1/GADD45A/TGFA/SAP30/NME2/TP53BP2
BIOCARTA_IGF1_PATHWAY	BIOCARTA_IGF1_PATHWAY	BIOCARTA_IGF1_PATHWAY	19	0.646904	1.57318	0.0325203	0.0865898	2731	tags=58%, list=14%, signal=50%	JUN/MAP2K1/FOS/ELK1/IGF1R/PTPN11/MAPK3/IRS1/GRB2/CSNK2A1/HRAS
AMIT_EGF_RESPONSE_120_HELA	AMIT_EGF_RESPONSE_120_HELA	AMIT_EGF_RESPONSE_120_HELA	63	0.647201	1.99869	0.00314465	0.0246978	2038	tags=41%, list=11%, signal=37%	MAFF/GEM/CXCL8/GADD45A/HBEGF/PLAUR/GDF15/CLCF1/TGFA/EPHA2/IRS2/JAG1/DUSP4/SAT1/JUP/NDEL1/FOSL1/NAB2/NAP1L1/DUSP6/KDM6B/BIRC2/F3/ZPR1/MCL1/MAP2K3
HERNANDEZ_MITOTIC_ARREST_BY_DOCETAXEL_1_DN	HERNANDEZ_MITOTIC_ARREST_BY_DOCETAXEL_1_DN	HERNANDEZ_MITOTIC_ARREST_BY_DOCETAXEL_1_DN	34	0.647491	1.80273	0.0028169	0.0246978	2134	tags=38%, list=11%, signal=34%	GBE1/GLRX/PLOD2/FHL2/XIST/DPYSL2/CKS1B/CDK1/LTBP3/FBXO5/UBE2C/PDGFC/CTHRC1
BIOCARTA_INFLAM_PATHWAY	BIOCARTA_INFLAM_PATHWAY	BIOCARTA_INFLAM_PATHWAY	27	0.648699	1.7398	0.010582	0.0382804	1768	tags=15%, list=9%, signal=13%	PDGFA/CXCL8/IL3/IL6
BORLAK_LIVER_CANCER_EGF_UP	BORLAK_LIVER_CANCER_EGF_UP	BORLAK_LIVER_CANCER_EGF_UP	48	0.648727	1.93629	0.003003	0.0246978	1612	tags=38%, list=8%, signal=34%	ATF3/PDGFA/SERPINE1/JUNB/TGFA/ELF3/FOS/SCD/ANXA2/TCEAL9/CLDN7/DDR1/KRT18/SPP1/TGIF1/CDK1/ACOT9/COL4A1
VANDESLUIS_COMMD1_TARGETS_GROUP_3_UP	VANDESLUIS_COMMD1_TARGETS_GROUP_3_UP	VANDESLUIS_COMMD1_TARGETS_GROUP_3_UP	77	0.649255	2.08584	0.003367	0.0246978	2682	tags=35%, list=14%, signal=30%	ADM/BNIP3L/LDHA/FAM162A/ALDOA/CDH1/RNASE4/IER3/PLEKHA2/ARID3B/SCARB1/PFKL/SPINT1/TPI1/PRSS8/SLC16A3/PLCXD1/CCNG1/PKP2/LSR/DSG2/ETV5/AP1M2/UPP1/APOC1/TAGLN2/STARD10
OSADA_ASCL1_TARGETS_DN	OSADA_ASCL1_TARGETS_DN	OSADA_ASCL1_TARGETS_DN	24	0.650054	1.67252	0.0106952	0.0385228	3427	tags=67%, list=18%, signal=55%	IGFBP6/DUSP1/CDH1/AHNAK/RASSF2/AXL/TGFBI/WNT7B/SOCS3/KLF5/SEMA3C/DKK3/PPP1R14A/NRG1/CRIM1/CD44
JI_METASTASIS_REPRESSED_BY_STK11	JI_METASTASIS_REPRESSED_BY_STK11	JI_METASTASIS_REPRESSED_BY_STK11	24	0.650131	1.67272	0.0106952	0.0385228	545	tags=21%, list=3%, signal=20%	GLRX/GDF15/EPAS1/ITGB5/DUSP4
MARTINEZ_RESPONSE_TO_TRABECTEDIN_UP	MARTINEZ_RESPONSE_TO_TRABECTEDIN_UP	MARTINEZ_RESPONSE_TO_TRABECTEDIN_UP	63	0.652068	2.01372	0.00314465	0.0246978	1018	tags=25%, list=5%, signal=24%	ATF3/GADD45B/IGFBP6/CDH1/VKORC1/JUNB/RSRP1/PGK1/S100A10/SERTAD1/SAT1/GUK1/HDAC3/RPS27/ADAM9/AKAP13
CAFFAREL_RESPONSE_TO_THC_UP	CAFFAREL_RESPONSE_TO_THC_UP	CAFFAREL_RESPONSE_TO_THC_UP	31	0.652144	1.78633	0.00547945	0.0270189	1947	tags=48%, list=10%, signal=44%	HERPUD1/VEGFA/CDKN1B/KCMF1/EMP1/USP3/RAB5A/SERINC1/UBR4/IPO7/RPS2/NUCB2/SEC31A/ZFP36L1/FNTA
BACOLOD_RESISTANCE_TO_ALKYLATING_AGENTS_UP	BACOLOD_RESISTANCE_TO_ALKYLATING_AGENTS_UP	BACOLOD_RESISTANCE_TO_ALKYLATING_AGENTS_UP	23	0.652279	1.65986	0.0160428	0.0527082	1750	tags=39%, list=9%, signal=36%	MT1X/MT1F/MT2A/MT1A/PRSS12/MDK/FBXO21/SGCE/MYOF
PID_SYNDECAN_3_PATHWAY	PID_SYNDECAN_3_PATHWAY	PID_SYNDECAN_3_PATHWAY	17	0.653262	1.57007	0.0327456	0.0869815	1052	tags=29%, list=5%, signal=28%	CXCL8/EGFR/CASK/NCAN/PSEN1
CHIBA_RESPONSE_TO_TSA_DN	CHIBA_RESPONSE_TO_TSA_DN	CHIBA_RESPONSE_TO_TSA_DN	21	0.653266	1.63244	0.0163043	0.0532675	2257	tags=43%, list=12%, signal=38%	CXCL8/EGFR/TP53BP2/DSP/ADAM9/LAMB1/MAPK6/MDM2/DMD
REACTOME_COLLAGEN_BIOSYNTHESIS_AND_MODIFYING_ENZYMES	REACTOME_COLLAGEN_BIOSYNTHESIS_AND_MODIFYING_ENZYMES	REACTOME_COLLAGEN_BIOSYNTHESIS_AND_MODIFYING_ENZYMES	66	0.653279	2.03147	0.00318471	0.0246978	3623	tags=38%, list=19%, signal=31%	P4HA1/P4HA2/PLOD2/COL13A1/PLOD1/PCOLCE2/P3H2/BMP1/CRTAP/COL12A1/COL6A2/SERPINH1/COL4A1/P4HB/PCOLCE/COL19A1/COL18A1/ADAMTS2/COL11A2/COL6A5/COL21A1/PLOD3/COL5A3/COL22A1/COL8A2
KUROZUMI_RESPONSE_TO_ONCOCYTIC_VIRUS_AND_CYCLIC_RGD	KUROZUMI_RESPONSE_TO_ONCOCYTIC_VIRUS_AND_CYCLIC_RGD	KUROZUMI_RESPONSE_TO_ONCOCYTIC_VIRUS_AND_CYCLIC_RGD	18	0.653518	1.56433	0.037234	0.0945418	3043	tags=22%, list=16%, signal=19%	BCL6/CCL11/CCR4/CCR9
QI_HYPOXIA_TARGETS_OF_HIF1A_AND_FOXA2	QI_HYPOXIA_TARGETS_OF_HIF1A_AND_FOXA2	QI_HYPOXIA_TARGETS_OF_HIF1A_AND_FOXA2	31	0.65414	1.7918	0.00547945	0.0270189	2242	tags=45%, list=12%, signal=40%	KDM3A/PLOD2/GPRC5A/HK1/ITGA5/CITED2/MARK2/DUSP10/SLC16A3/MED15/COL6A2/IP6K2/LBH/ACTN4
BOQUEST_STEM_CELL_CULTURED_VS_FRESH_DN	BOQUEST_STEM_CELL_CULTURED_VS_FRESH_DN	BOQUEST_STEM_CELL_CULTURED_VS_FRESH_DN	28	0.654499	1.77414	0.00813008	0.0317868	2516	tags=29%, list=13%, signal=25%	FOSB/PTGER4/CPVL/PDGFRL/PPL/SOCS3/DPT/NTRK2
AMIT_SERUM_RESPONSE_120_MCF10A	AMIT_SERUM_RESPONSE_120_MCF10A	AMIT_SERUM_RESPONSE_120_MCF10A	63	0.655007	2.0228	0.00314465	0.0246978	2207	tags=46%, list=11%, signal=41%	MAFF/GADD45B/CDKN1C/PIM1/GADD45A/PLAUR/JUNB/CLCF1/SOX9/KLF4/SERTAD3/SIK1/IRS2/MNT/BCAR3/FERMT2/RND3/RYBP/DUSP10/CD55/SUN1/LIF/SKIL/KRT10/MCL1/PPP2R5D/KLF10/KLF5/PDLIM5
KOBAYASHI_RESPONSE_TO_ROMIDEPSIN	KOBAYASHI_RESPONSE_TO_ROMIDEPSIN	KOBAYASHI_RESPONSE_TO_ROMIDEPSIN	18	0.655199	1.56835	0.037234	0.0945418	3158	tags=44%, list=16%, signal=37%	CXCL8/FOS/MICA/LPIN1/RAB3IP/EFNB2/PMEL/TNFAIP6
CHEN_LUNG_CANCER_SURVIVAL	CHEN_LUNG_CANCER_SURVIVAL	CHEN_LUNG_CANCER_SURVIVAL	25	0.65606	1.71634	0.0080429	0.0317868	2433	tags=44%, list=13%, signal=38%	HSPA5/PGK1/ACTB/PGAM1/ACTG1/KRT7/CALU/PKM/P4HB/HPRT1/KRT8
ZHU_CMV_8_HR_DN	ZHU_CMV_8_HR_DN	ZHU_CMV_8_HR_DN	45	0.656182	1.92323	0.00304878	0.0246978	2064	tags=40%, list=11%, signal=36%	DDIT4/ADM/NR2F2/FBLN1/IGF1R/RBMS1/AHR/IGFBP2/CEBPD/LMNA/MYH9/TFAP2A/MARCKS/RALGDS/ANAPC1/ZFP36L1/WEE1/ADRA2A
BIOCARTA_IL2_PATHWAY	BIOCARTA_IL2_PATHWAY	BIOCARTA_IL2_PATHWAY	21	0.656609	1.64079	0.0163043	0.0532675	3662	tags=57%, list=19%, signal=46%	JUN/MAP2K1/FOS/ELK1/MAPK3/GRB2/CSNK2A1/JAK1/HRAS/MAPK8/IL2/LCK
REACTOME_GLUCONEOGENESIS	REACTOME_GLUCONEOGENESIS	REACTOME_GLUCONEOGENESIS	33	0.656666	1.81735	0.00277008	0.0246978	643	tags=24%, list=3%, signal=23%	ALDOC/GPI/ENO2/ALDOA/GAPDH/PGK1/PGAM1/TPI1
BIOCARTA_DC_PATHWAY	BIOCARTA_DC_PATHWAY	BIOCARTA_DC_PATHWAY	17	0.656905	1.57883	0.0327456	0.0869815	758	tags=12%, list=4%, signal=11%	CD2/IL3
PID_FRA_PATHWAY	PID_FRA_PATHWAY	PID_FRA_PATHWAY	35	0.657094	1.85534	0.00275482	0.0246978	2081	tags=43%, list=11%, signal=38%	JUN/CXCL8/PLAUR/JUNB/ATF4/FOSL2/HMOX1/ITGB4/LAMA3/FOSL1/NFATC1/DMTF1/LIF/IL6/MGP
ABE_VEGFA_TARGETS_2HR	ABE_VEGFA_TARGETS_2HR	ABE_VEGFA_TARGETS_2HR	32	0.657189	1.80748	0.00273973	0.0246978	1956	tags=34%, list=10%, signal=31%	HERPUD1/PTGS2/HBEGF/NR4A1/EIF1/LDLR/RAPGEF1/PPL/XPO7/AURKC/CUX1
JIANG_HYPOXIA_NORMAL	JIANG_HYPOXIA_NORMAL	JIANG_HYPOXIA_NORMAL	186	0.658379	2.35488	0.0042735	0.0252997	1983	tags=45%, list=10%, signal=40%	ANGPTL4/ALDOC/BNIP3/NDRG1/P4HA1/SLC2A1/TSC22D3/HILPDA/MSMO1/BNIP3L/ENO2/NEK6/HSPA5/GADD45B/OSER1/PLOD2/PPP1R15A/FAM162A/AK4/DUSP1/STC2/ZFP36/GPRC5A/SERPINE1/YPEL5/SLC35E1/SLC30A1/RIPK4/AKAP12/SERGEF/PLIN2/KCMF1/C2orf49/MSANTD3/RFX3/SCD/UGP2/SESN2/NT5E/RAB20/CANX/CITED2/HMOX1/IMMP2L/UGCG/ASPH/MVK/IGFBP3/PIM2/SNTA1/RYBP/HLA-A/ITGB4/SNX10/SDCBP/NOL3/TCEA3/CDK8/SQLE/MAPK7/CA12/PEA15/PTPN12/FBXO8/MDK/…
BERENJENO_ROCK_SIGNALING_NOT_VIA_RHOA_UP	BERENJENO_ROCK_SIGNALING_NOT_VIA_RHOA_UP	BERENJENO_ROCK_SIGNALING_NOT_VIA_RHOA_UP	28	0.658565	1.78516	0.00813008	0.0317868	1298	tags=25%, list=7%, signal=23%	NDRG1/ATF3/CD34/TRIB3/HLA-A/CP/ACAA2
LEE_AGING_NEOCORTEX_UP	LEE_AGING_NEOCORTEX_UP	LEE_AGING_NEOCORTEX_UP	70	0.659274	2.07582	0.00309598	0.0246978	1470	tags=31%, list=8%, signal=29%	ALDOC/DDIT3/NDRG1/P4HA1/SEMA4B/GADD45A/VEGFA/JUNB/NR4A1/S100A10/FOS/CD68/UBC/SAT1/PPP2R5C/HSD17B12/CMPK1/CYB561/CTSD/SPP1/IFI27/LAMB1
ZIRN_TRETINOIN_RESPONSE_WT1_UP	ZIRN_TRETINOIN_RESPONSE_WT1_UP	ZIRN_TRETINOIN_RESPONSE_WT1_UP	23	0.659614	1.67852	0.013369	0.045877	722	tags=26%, list=4%, signal=25%	IGFBP6/PLAUR/AKAP12/GDE1/SMAD3/IGFBP3
GARGALOVIC_RESPONSE_TO_OXIDIZED_PHOSPHOLIPIDS_CYAN_UP	GARGALOVIC_RESPONSE_TO_OXIDIZED_PHOSPHOLIPIDS_CYAN_UP	GARGALOVIC_RESPONSE_TO_OXIDIZED_PHOSPHOLIPIDS_CYAN_UP	16	0.660882	1.56043	0.045	0.106789	1959	tags=50%, list=10%, signal=45%	CITED2/TFE3/PTGER4/PSEN1/CSGALNACT2/SETD5/USP12/GNA13
BIOCARTA_CDMAC_PATHWAY	BIOCARTA_CDMAC_PATHWAY	BIOCARTA_CDMAC_PATHWAY	15	0.661101	1.51445	0.0489691	0.11284	2731	tags=53%, list=14%, signal=46%	JUN/MAP2K1/FOS/PRKCA/MAPK1/MAPK3/PLCB1/HRAS
RASHI_NFKB1_TARGETS	RASHI_NFKB1_TARGETS	RASHI_NFKB1_TARGETS	16	0.661293	1.5614	0.045	0.106789	1996	tags=50%, list=10%, signal=45%	DUSP16/TNIP1/LCN2/DUSP6/MAP3K8/NFKB2/TNFAIP3/MDM2
BIOCARTA_TGFB_PATHWAY	BIOCARTA_TGFB_PATHWAY	BIOCARTA_TGFB_PATHWAY	18	0.662184	1.58508	0.0345745	0.0897685	2982	tags=44%, list=16%, signal=38%	CDH1/MAP2K1/SMAD3/SMAD7/SKIL/MAPK3/MAP3K7/SMAD4
AMIT_EGF_RESPONSE_120_MCF10A	AMIT_EGF_RESPONSE_120_MCF10A	AMIT_EGF_RESPONSE_120_MCF10A	39	0.662427	1.91656	0.00273973	0.0246978	1622	tags=41%, list=8%, signal=38%	MAFF/HBEGF/PLAUR/GDF15/EPHA2/ING2/EIF1/TXNRD1/SPRY4/MRGBP/FOSL1/NAP1L1/DUSP6/CDV3/SH2D3A/LIF
BOYAULT_LIVER_CANCER_SUBCLASS_G6_DN	BOYAULT_LIVER_CANCER_SUBCLASS_G6_DN	BOYAULT_LIVER_CANCER_SUBCLASS_G6_DN	19	0.662796	1.61182	0.0298103	0.0812531	348	tags=21%, list=2%, signal=21%	HES1/CDH1/SDC4/LDLR
GROSS_HYPOXIA_VIA_HIF1A_DN	GROSS_HYPOXIA_VIA_HIF1A_DN	GROSS_HYPOXIA_VIA_HIF1A_DN	103	0.662834	2.20702	0.00364964	0.0246978	1694	tags=33%, list=9%, signal=30%	ADM/BNIP3/SLC2A1/ATF3/BHLHE40/HILPDA/GBE1/INSIG2/ENO2/CSRNP1/NOCT/HBEGF/VEGFA/ZFP36/GAPDH/PFKFB3/KLF4/ZNF143/FOS/ERRFI1/FOXO3/SH3BP4/GPRC5C/DAP/EIF1B/PIM3/TGIF1/PPL/MYH9/GYS1/MT1E/CAV1/S100A13/SKIL
PID_ANTHRAX_PATHWAY	PID_ANTHRAX_PATHWAY	PID_ANTHRAX_PATHWAY	16	0.663372	1.56631	0.045	0.106789	2073	tags=31%, list=11%, signal=28%	MAP2K1/MAPK1/ANTXR2/MAP2K3/MAPK3
GRANDVAUX_IRF3_TARGETS_DN	GRANDVAUX_IRF3_TARGETS_DN	GRANDVAUX_IRF3_TARGETS_DN	18	0.664024	1.58948	0.0319149	0.0854548	1546	tags=28%, list=8%, signal=26%	GEM/STK17B/SORL1/ADAM9/RPS7
LOPEZ_MESOTHELIOMA_SURVIVAL_OVERALL_DN	LOPEZ_MESOTHELIOMA_SURVIVAL_OVERALL_DN	LOPEZ_MESOTHELIOMA_SURVIVAL_OVERALL_DN	15	0.664395	1.52199	0.0463918	0.108778	1670	tags=60%, list=9%, signal=55%	STC2/HOXB6/PLXNA3/NEK2/TGFB1I1/TUBB2A/FLNB/CD24/JPT1
MARCHINI_TRABECTEDIN_RESISTANCE_DN	MARCHINI_TRABECTEDIN_RESISTANCE_DN	MARCHINI_TRABECTEDIN_RESISTANCE_DN	44	0.666339	1.93326	0.00304878	0.0246978	2400	tags=41%, list=12%, signal=36%	ADM/BHLHE40/GPI/HSPA5/CITED2/RND3/IGFBP7/HSP90B1/ACTG1/CBLB/SLC16A3/PTTG1IP/NOTCH3/CALR/HLA-B/SLC3A2/CSNK2A1/PKN1
BRUNO_HEMATOPOIESIS	BRUNO_HEMATOPOIESIS	BRUNO_HEMATOPOIESIS	59	0.666535	2.05543	0.00310559	0.0246978	1012	tags=25%, list=5%, signal=24%	BNIP3/BHLHE40/MSMO1/HK2/PFKP/AK4/PTGS2/NOCT/CCNG2/SCD/ANXA2/IGFBP7/SPINT1/RNF19A/CD55
REACTOME_ANTIGEN_PRESENTATION_FOLDING_ASSEMBLY_AND_PEPTIDE_LOADING_OF_CLASS_I_MHC	REACTOME_ANTIGEN_PRESENTATION_FOLDING_ASSEMBLY_AND_PEPTIDE_LOADING_OF_CLASS_I_MHC	REACTOME_ANTIGEN_PRESENTATION_FOLDING_ASSEMBLY_AND_PEPTIDE_LOADING_OF_CLASS_I_MHC	24	0.66655	1.71496	0.00802139	0.0317868	2502	tags=46%, list=13%, signal=40%	HSPA5/SEC24D/CANX/HLA-A/HLA-G/HLA-E/SEC31A/CALR/HLA-B/SEC24C/HLA-C
WANG_TNF_TARGETS	WANG_TNF_TARGETS	WANG_TNF_TARGETS	24	0.667843	1.71829	0.00802139	0.0317868	4209	tags=50%, list=22%, signal=39%	JUN/GDF15/CD68/IL6/NOTCH3/TNFAIP3/SELE/TRAF1/YY1/MMP13/CSF2/NFKBIA
DUNNE_TARGETS_OF_AML1_MTG8_FUSION_DN	DUNNE_TARGETS_OF_AML1_MTG8_FUSION_DN	DUNNE_TARGETS_OF_AML1_MTG8_FUSION_DN	19	0.668141	1.62482	0.0298103	0.0812531	2472	tags=42%, list=13%, signal=37%	SLC2A3/CD34/FOSL2/ELK3/DUSP6/TSPAN7/ID1/RUNX1T1
TIEN_INTESTINE_PROBIOTICS_2HR_UP	TIEN_INTESTINE_PROBIOTICS_2HR_UP	TIEN_INTESTINE_PROBIOTICS_2HR_UP	28	0.668678	1.81258	0.00813008	0.0317868	2205	tags=43%, list=11%, signal=38%	GAPDH/PGK1/UBC/EEF1A1/CA12/TPT1/NAP1L1/RPS3A/ST6GALNAC4/RPLP0/KDELR1/KLF5
JIANG_TIP30_TARGETS_UP	JIANG_TIP30_TARGETS_UP	JIANG_TIP30_TARGETS_UP	43	0.669455	1.94713	0.00295858	0.0246978	2151	tags=42%, list=11%, signal=37%	P4HA1/NFIL3/DUSP1/IER3/BCL6/JAG1/ANXA2/C1GALT1/ARG2/IGFBP3/ITGA6/VCAN/AXL/CDK1/LAMB1/CD24/WEE1/IRS1
NAKAMURA_METASTASIS_MODEL_DN	NAKAMURA_METASTASIS_MODEL_DN	NAKAMURA_METASTASIS_MODEL_DN	43	0.671007	1.95164	0.00295858	0.0246978	1102	tags=33%, list=6%, signal=31%	ALDOC/SEMA4B/RRAGD/AK4/CAST/P3H2/SLCO4A1/LDLR/TFPI/RAC2/UGCG/SERPINB1/PLEK2/TGFB1I1
BURTON_ADIPOGENESIS_1	BURTON_ADIPOGENESIS_1	BURTON_ADIPOGENESIS_1	30	0.672206	1.84583	0.008	0.0317868	632	tags=40%, list=3%, signal=39%	NFIL3/MAFF/NR4A2/VEGFA/ELL2/IER3/SLC25A25/PER1/IRS2/ERRFI1/FOSL2/DNAJB4
TIEN_INTESTINE_PROBIOTICS_24HR_DN	TIEN_INTESTINE_PROBIOTICS_24HR_DN	TIEN_INTESTINE_PROBIOTICS_24HR_DN	197	0.672595	2.43524	0.00438596	0.0256023	2438	tags=48%, list=13%, signal=42%	HERPUD1/DDIT4/NDRG1/ATF3/NFIL3/BTG1/BNIP3L/LAMB3/HSPA5/GLRX/PPP1R15A/DNAJB9/MBNL2/CBX4/ATF2/VEGFA/GDF15/SLC35E1/ELF3/CDK2AP2/EIF1/HSPA13/TRIB3/UBE2H/JAG1/TMED7/MANF/NBR1/ACBD3/TMEM39A/UBC/ARIH1/RAB2A/CANX/GFPT1/SH3GLB1/CDC5L/ESRP1/TXNRD1/TFE3/SAT1/HSP90B1/ACTG1/PDIA4/MTHFD2/TES/EEF1A1/PDIA6/RPS27/RANBP9/CEP57/FTL/CD55/RPL39/RPL10/SEC63/TPT1/ARF4/NAP1L1/ZNF277/TBC1D15/RPL23A/RPS2/RNF19B/PRSS3/RPS3…
PODAR_RESPONSE_TO_ADAPHOSTIN_DN	PODAR_RESPONSE_TO_ADAPHOSTIN_DN	PODAR_RESPONSE_TO_ADAPHOSTIN_DN	15	0.672789	1.54122	0.0386598	0.0967639	657	tags=40%, list=3%, signal=39%	MSMO1/INSIG1/HK2/SCD/FDFT1/ACTG1
GAUSSMANN_MLL_AF4_FUSION_TARGETS_E_DN	GAUSSMANN_MLL_AF4_FUSION_TARGETS_E_DN	GAUSSMANN_MLL_AF4_FUSION_TARGETS_E_DN	20	0.673171	1.65897	0.0162162	0.0530834	1633	tags=20%, list=8%, signal=18%	TRIB3/NEO1/GPT2/TUBB3
DORSAM_HOXA9_TARGETS_DN	DORSAM_HOXA9_TARGETS_DN	DORSAM_HOXA9_TARGETS_DN	29	0.673223	1.84522	0.00802139	0.0317868	1357	tags=48%, list=7%, signal=45%	TSC22D3/JUN/GLRX/JUNB/SDC4/OSBPL8/RBBP6/SRSF11/SBNO1/SDCBP/FXR1/KRT18/WSB1/HBE1
REACTOME_THROMBOXANE_SIGNALLING_THROUGH_TP_RECEPTOR	REACTOME_THROMBOXANE_SIGNALLING_THROUGH_TP_RECEPTOR	REACTOME_THROMBOXANE_SIGNALLING_THROUGH_TP_RECEPTOR	24	0.674007	1.73415	0.00802139	0.0317868	2247	tags=29%, list=12%, signal=26%	GNG8/GNG4/GNAQ/GNA13/GNG5/GNB2/GNG11
CHEN_LVAD_SUPPORT_OF_FAILING_HEART_UP	CHEN_LVAD_SUPPORT_OF_FAILING_HEART_UP	CHEN_LVAD_SUPPORT_OF_FAILING_HEART_UP	97	0.67745	2.25454	0.00352113	0.0246978	1883	tags=36%, list=10%, signal=33%	DDIT4/ATF3/NFIL3/TSC22D3/JUN/TIPARP/GADD45B/ZFP36/SERPINE1/MT1X/PLIN2/PER1/BCL6/IRS2/SLCO4A1/KCNK1/KLF9/FOXO3/FOSL2/MT1F/RND3/FNDC3B/MT2A/MTHFD2/FHL1/PLPP1/CALD1/NCKIPSD/CEBPD/RRAS2/MT1E/LAMB1/VCL/CCNB1IP1/MCL1
FRIDMAN_IMMORTALIZATION_DN	FRIDMAN_IMMORTALIZATION_DN	FRIDMAN_IMMORTALIZATION_DN	28	0.678294	1.83864	0.00813008	0.0317868	1102	tags=36%, list=6%, signal=34%	IGFBP6/SERPINE1/MAP1LC3B/IGFBP7/IGFBP3/CREG1/AHR/IRF7/OPTN/TGFB1I1
MASRI_RESISTANCE_TO_TAMOXIFEN_AND_AROMATASE_INHIBITORS_DN	MASRI_RESISTANCE_TO_TAMOXIFEN_AND_AROMATASE_INHIBITORS_DN	MASRI_RESISTANCE_TO_TAMOXIFEN_AND_AROMATASE_INHIBITORS_DN	17	0.67919	1.63239	0.0277078	0.0774832	977	tags=24%, list=5%, signal=22%	FHL2/EPAS1/NT5E/CALD1
INGA_TP53_TARGETS	INGA_TP53_TARGETS	INGA_TP53_TARGETS	16	0.679393	1.60414	0.035	0.0903814	2406	tags=56%, list=13%, signal=49%	GADD45A/IER3/FOS/PMAIP1/IGFBP3/BBC3/CCNG1/MDM2/BAX
BIOCARTA_MTA3_PATHWAY	BIOCARTA_MTA3_PATHWAY	BIOCARTA_MTA3_PATHWAY	18	0.679498	1.62652	0.0265957	0.075576	1245	tags=28%, list=6%, signal=26%	ALDOA/CDH1/GAPDH/MTA3/CTSD
TONKS_TARGETS_OF_RUNX1_RUNX1T1_FUSION_SUSTAINED_IN_MONOCYTE_UP	TONKS_TARGETS_OF_RUNX1_RUNX1T1_FUSION_SUSTAINED_IN_MONOCYTE_UP	TONKS_TARGETS_OF_RUNX1_RUNX1T1_FUSION_SUSTAINED_IN_MONOCYTE_UP	19	0.679533	1.65253	0.0189702	0.0590312	1703	tags=37%, list=9%, signal=34%	GDF15/TFPI/ARG2/TM4SF1/NAP1L1/DUSP6/UCHL1
WEINMANN_ADAPTATION_TO_HYPOXIA_DN	WEINMANN_ADAPTATION_TO_HYPOXIA_DN	WEINMANN_ADAPTATION_TO_HYPOXIA_DN	39	0.679799	1.96682	0.00273973	0.0246978	1768	tags=44%, list=9%, signal=40%	STC2/PLAUR/IER3/SDC4/EPAS1/KCNK1/NT5E/TPBG/IGFBP7/CRLF1/UGCG/IGFBP3/SLC16A3/CD55/NNMT/MARCKS/IL6
PID_TCR_RAS_PATHWAY	PID_TCR_RAS_PATHWAY	PID_TCR_RAS_PATHWAY	14	0.679943	1.5405	0.0426065	0.103689	2073	tags=64%, list=11%, signal=57%	MAP2K1/FOS/ELK1/NRAS/BRAF/MAP3K8/PRKCA/MAPK1/MAPK3
GARGALOVIC_RESPONSE_TO_OXIDIZED_PHOSPHOLIPIDS_MAGENTA_UP	GARGALOVIC_RESPONSE_TO_OXIDIZED_PHOSPHOLIPIDS_MAGENTA_UP	GARGALOVIC_RESPONSE_TO_OXIDIZED_PHOSPHOLIPIDS_MAGENTA_UP	27	0.680277	1.82449	0.00793651	0.0317868	475	tags=33%, list=2%, signal=33%	MAFF/CSRNP1/DUSP16/PPP1R15A/PTGS2/C16orf72/GABARAPL1/KLF6/FOSL2
DACOSTA_ERCC3_ALLELE_XPCS_VS_TTD_UP	DACOSTA_ERCC3_ALLELE_XPCS_VS_TTD_UP	DACOSTA_ERCC3_ALLELE_XPCS_VS_TTD_UP	27	0.680606	1.82538	0.00793651	0.0317868	1743	tags=41%, list=9%, signal=37%	IGFBP6/FOS/ISG20/NMB/IGFBP2/RASSF2/GNG4/NNMT/MDK/CTSH/TGM2
YAO_TEMPORAL_RESPONSE_TO_PROGESTERONE_CLUSTER_0	YAO_TEMPORAL_RESPONSE_TO_PROGESTERONE_CLUSTER_0	YAO_TEMPORAL_RESPONSE_TO_PROGESTERONE_CLUSTER_0	72	0.681073	2.16402	0.0031746	0.0246978	1251	tags=28%, list=7%, signal=26%	ALDOC/BNIP3/GEM/LAMB3/MXI1/CCNG2/MAP1LC3B/DBP/GABARAPL1/NR1D1/NT5E/NR1D2/IGFBP3/PROS1/HLA-A/HAUS4/LAMA3/TEF/TMEM159/CEBPD
ZWANG_CLASS_3_TRANSIENTLY_INDUCED_BY_EGF	ZWANG_CLASS_3_TRANSIENTLY_INDUCED_BY_EGF	ZWANG_CLASS_3_TRANSIENTLY_INDUCED_BY_EGF	214	0.681291	2.46867	0.00518135	0.0270037	2230	tags=47%, list=12%, signal=42%	ADM/NDRG1/SLC2A1/HES1/ATF3/BHLHE40/MAFF/NR4A2/TIPARP/GEM/CSRNP1/FOSB/ARL5B/DUSP5/CXCL8/PPP1R15A/PTGS2/MBNL2/DUSP1/HBEGF/PLAUR/SERPINE1/ETS1/JUNB/ANO6/ELL2/NR4A1/IER3/TLE3/EPHA2/ELF3/RIPK4/PFKFB3/DBP/ITPRIP/KLF4/PER1/SIK1/EMP1/FOS/BCL3/JAG1/CLDN4/FOSL2/TXNRD1/SGMS2/EIF2AK3/PELI1/IGF1R/FERMT2/RND3/RBMS1/SH3BP4/IL1RAP/UGCG/SBNO2/PROS1/PPTC7/NR4A3/CSNK1E/ATXN1/WWC1/NCEH1/CD55/TOB1/KLF3/ARHGAP42/NAP1L…
PID_ECADHERIN_STABILIZATION_PATHWAY	PID_ECADHERIN_STABILIZATION_PATHWAY	PID_ECADHERIN_STABILIZATION_PATHWAY	39	0.682249	1.97391	0.00273973	0.0246978	3075	tags=44%, list=16%, signal=37%	CDH1/EGFR/EPHA2/NECTIN2/IGF1R/NCK1/CYFIP2/EXOC4/ZYX/VCL/ABI1/CTNNA1/DIAPH1/MYL2/ENAH/GIT1/ROCK1
AIGNER_ZEB1_TARGETS	AIGNER_ZEB1_TARGETS	AIGNER_ZEB1_TARGETS	35	0.682597	1.92735	0.00275482	0.0246978	1642	tags=40%, list=9%, signal=37%	GJB3/CDH1/PATJ/CXADR/MPZL2/CLDN7/CRB3/DSP/CDH3/DSC2/PPL/SH3YL1/F11R/CD24
BIOCARTA_STEM_PATHWAY	BIOCARTA_STEM_PATHWAY	BIOCARTA_STEM_PATHWAY	14	0.682716	1.54678	0.0426065	0.103689	4207	tags=50%, list=22%, signal=39%	CXCL8/IL3/IL6/IL2/IL4/CD8A/CSF2
BERENJENO_TRANSFORMED_BY_RHOA_REVERSIBLY_DN	BERENJENO_TRANSFORMED_BY_RHOA_REVERSIBLY_DN	BERENJENO_TRANSFORMED_BY_RHOA_REVERSIBLY_DN	27	0.682881	1.83148	0.00793651	0.0317868	1215	tags=30%, list=6%, signal=28%	ADM/AK4/SERPINE1/PBX3/ERRFI1/PTGER4/FHL1/DUSP6
CHAUHAN_RESPONSE_TO_METHOXYESTRADIOL_DN	CHAUHAN_RESPONSE_TO_METHOXYESTRADIOL_DN	CHAUHAN_RESPONSE_TO_METHOXYESTRADIOL_DN	98	0.682946	2.27381	0.00353357	0.0246978	1961	tags=38%, list=10%, signal=34%	HERPUD1/ADM/BTG1/ENO2/MXI1/AP1S2/PGK1/S100A10/XBP1/FOXO3/UBC/PDLIM1/HSP90B1/VIM/SEC61G/LGALS1/PIM2/EEF1A1/HLA-G/CYFIP2/CSNK1E/MAN2A1/NAP1L1/ARL6IP1/BTF3/TUBB2A/PCBP2/PKM/TLN1/COPE/MARCKS/UGT2B15/PABPC1/RPL12/MCL1/EIF3F/TNFAIP3
NAGASHIMA_NRG1_SIGNALING_UP	NAGASHIMA_NRG1_SIGNALING_UP	NAGASHIMA_NRG1_SIGNALING_UP	163	0.683192	2.4099	0.00404858	0.0251198	1755	tags=46%, list=9%, signal=42%	ADM/DDIT3/HES1/ATF3/BHLHE40/NFIL3/HILPDA/MAFF/JUN/NR4A2/TIPARP/GEM/AVPI1/FOSB/DUSP5/GADD45B/PPP1R15A/FHL2/DUSP1/GADD45A/HBEGF/PLAUR/VEGFA/ZFP36/GDF15/JUNB/NR4A1/CLCF1/IER3/EPHA2/PFKFB3/DNAJB1/PER1/SERTAD3/SIK1/JMJD6/IRS2/FOS/SLCO4A1/CLDN4/LDLR/LAMC2/PMAIP1/TUFT1/KLF6/ISG20/ARG2/ATG101/FERMT2/DUSP4/EGR1/CXCR4/TES/NDEL1/NR4A3/DUSP10/LAMA3/NPC1/ZYX/FOSL1/NAB2/NAP1L1/TOB2/KBTBD2/KDM6B/DUSP8/STK24/TUB…
DAUER_STAT3_TARGETS_UP	DAUER_STAT3_TARGETS_UP	DAUER_STAT3_TARGETS_UP	47	0.684122	2.04435	0.00298507	0.0246978	2351	tags=45%, list=12%, signal=39%	ADM/SLC2A3/ATF3/JUN/DUSP5/ZFP36/PFKFB3/AKAP12/BCL6/BCL3/LDLR/UGCG/NPC1/FOSL1/CEBPD/FLNB/SAMD4A/SOCS3/FEM1C/KLF11/EFNB2
REACTOME_BMAL1_CLOCK_NPAS2_ACTIVATES_CIRCADIAN_GENE_EXPRESSION	REACTOME_BMAL1_CLOCK_NPAS2_ACTIVATES_CIRCADIAN_GENE_EXPRESSION	REACTOME_BMAL1_CLOCK_NPAS2_ACTIVATES_CIRCADIAN_GENE_EXPRESSION	26	0.684363	1.81267	0.00526316	0.0270037	1036	tags=27%, list=5%, signal=26%	BHLHE40/NOCT/NAMPT/SERPINE1/DBP/CLOCK/TBL1XR1
SHAFFER_IRF4_TARGETS_IN_MYELOMA_VS_MATURE_B_LYMPHOCYTE	SHAFFER_IRF4_TARGETS_IN_MYELOMA_VS_MATURE_B_LYMPHOCYTE	SHAFFER_IRF4_TARGETS_IN_MYELOMA_VS_MATURE_B_LYMPHOCYTE	89	0.685889	2.28216	0.00333333	0.0246978	1238	tags=37%, list=6%, signal=35%	DDIT3/NDRG1/P4HA1/ATF3/NFIL3/LDHA/DUSP5/DNAJB9/MXI1/NAMPT/ZFP36/NR4A1/PGK1/BCL2L2/UBE2H/ATF4/LDLR/TUFT1/ISG20/CANX/GFPT1/HSP90B1/BCKDHA/PDIA4/UAP1/PPP2R5C/PIM2/FHL1/SPATS2/MAN2A1/YES1/CYP51A1/PAM
WEST_ADRENOCORTICAL_TUMOR_MARKERS_DN	WEST_ADRENOCORTICAL_TUMOR_MARKERS_DN	WEST_ADRENOCORTICAL_TUMOR_MARKERS_DN	18	0.687275	1.64514	0.018617	0.0586394	288	tags=17%, list=1%, signal=16%	NR4A2/FOSB/FBLN1
KORKOLA_TERATOMA_UP	KORKOLA_TERATOMA_UP	KORKOLA_TERATOMA_UP	16	0.687413	1.62308	0.035	0.0903814	2430	tags=31%, list=13%, signal=27%	SLC2A3/EMP1/RECQL/MGP/C12orf57
COATES_MACROPHAGE_M1_VS_M2_DN	COATES_MACROPHAGE_M1_VS_M2_DN	COATES_MACROPHAGE_M1_VS_M2_DN	75	0.687966	2.20049	0.00327869	0.0246978	1703	tags=27%, list=9%, signal=24%	ANKRD37/ALDOC/BNIP3/SLC2A1/HILPDA/ANG/AK4/VEGFA/GDF15/SCD/EFHD2/PINK1/ATG4D/HLA-A/CBLB/SH2B2/ARSK/RRAS2/CD24/UCHL1
SARTIPY_BLUNTED_BY_INSULIN_RESISTANCE_DN	SARTIPY_BLUNTED_BY_INSULIN_RESISTANCE_DN	SARTIPY_BLUNTED_BY_INSULIN_RESISTANCE_DN	18	0.688501	1.64807	0.018617	0.0586394	1656	tags=50%, list=9%, signal=46%	HERPUD1/GADD45A/CDKN1B/DBP/TRIB3/UBE2H/ACVR1/CDK1/RALGDS
BIOCARTA_HIF_PATHWAY	BIOCARTA_HIF_PATHWAY	BIOCARTA_HIF_PATHWAY	15	0.689464	1.57942	0.0335052	0.088126	2015	tags=40%, list=10%, signal=36%	JUN/LDHA/VEGFA/ASPH/P4HB/ARNT
CHUANG_OXIDATIVE_STRESS_RESPONSE_UP	CHUANG_OXIDATIVE_STRESS_RESPONSE_UP	CHUANG_OXIDATIVE_STRESS_RESPONSE_UP	28	0.691603	1.87472	0.00813008	0.0317868	576	tags=25%, list=3%, signal=24%	DDIT3/JUN/GDF15/MT1X/H19/EGR1/HMOX1
GALINDO_IMMUNE_RESPONSE_TO_ENTEROTOXIN	GALINDO_IMMUNE_RESPONSE_TO_ENTEROTOXIN	GALINDO_IMMUNE_RESPONSE_TO_ENTEROTOXIN	75	0.69165	2.21227	0.00327869	0.0246978	1368	tags=41%, list=7%, signal=39%	HERPUD1/BHLHE40/PDGFA/GLRX/GADD45B/PTGS2/PIM1/TNIP1/NOCT/DUSP1/GADD45A/PLAUR/VEGFA/JUNB/GAPDH/IER3/MT1X/BCL3/SCD/ERRFI1/ITGA5/TNFSF9/UBC/RREB1/RAC2/ACTG1/BCL2L11/FOSL1/NAB2/SPP1/PKM
BIOCARTA_MCALPAIN_PATHWAY	BIOCARTA_MCALPAIN_PATHWAY	BIOCARTA_MCALPAIN_PATHWAY	19	0.692925	1.68509	0.0108401	0.0387108	2901	tags=42%, list=15%, signal=36%	EGFR/ITGB1/TLN1/PRKAR1B/MYL2/CAPN2/HRAS/PRKAR2A
REACTOME_ACETYLCHOLINE_NEUROTRANSMITTER_RELEASE_CYCLE	REACTOME_ACETYLCHOLINE_NEUROTRANSMITTER_RELEASE_CYCLE	REACTOME_ACETYLCHOLINE_NEUROTRANSMITTER_RELEASE_CYCLE	17	0.693071	1.66575	0.02267	0.0670452	528	tags=24%, list=3%, signal=23%	PPFIA1/SYT1/STXBP1/RAB3A
WANG_LSD1_TARGETS_UP	WANG_LSD1_TARGETS_UP	WANG_LSD1_TARGETS_UP	23	0.69393	1.76585	0.00802139	0.0317868	1382	tags=30%, list=7%, signal=28%	PDGFA/CDKN1C/CSRP2/LGALS1/IGFBP2/ELK3/MDK
REACTOME_SEROTONIN_NEUROTRANSMITTER_RELEASE_CYCLE	REACTOME_SEROTONIN_NEUROTRANSMITTER_RELEASE_CYCLE	REACTOME_SEROTONIN_NEUROTRANSMITTER_RELEASE_CYCLE	18	0.694041	1.66133	0.0132979	0.0458214	1800	tags=33%, list=9%, signal=30%	PPFIA1/SYT1/STXBP1/RAB3A/SYN2/PPFIA4
RASHI_RESPONSE_TO_IONIZING_RADIATION_1	RASHI_RESPONSE_TO_IONIZING_RADIATION_1	RASHI_RESPONSE_TO_IONIZING_RADIATION_1	34	0.694089	1.93246	0.0028169	0.0246978	562	tags=29%, list=3%, signal=29%	SLC2A1/ATF3/JUN/DUSP1/GADD45A/VEGFA/ZFP36/IER3/FOS/EGR1
PID_INTEGRIN_CS_PATHWAY	PID_INTEGRIN_CS_PATHWAY	PID_INTEGRIN_CS_PATHWAY	23	0.694256	1.76668	0.00802139	0.0317868	1252	tags=26%, list=7%, signal=24%	ITGB5/ITGA5/ITGB4/ITGA6/ITGB1/ITGB2
BOYAULT_LIVER_CANCER_SUBCLASS_G56_DN	BOYAULT_LIVER_CANCER_SUBCLASS_G56_DN	BOYAULT_LIVER_CANCER_SUBCLASS_G56_DN	14	0.694598	1.57371	0.037594	0.0948069	171	tags=29%, list=1%, signal=28%	BHLHE40/MAFF/QSOX1/IER3
PID_ATF2_PATHWAY	PID_ATF2_PATHWAY	PID_ATF2_PATHWAY	57	0.694736	2.13695	0.00306748	0.0246978	2385	tags=42%, list=12%, signal=37%	DDIT3/HES1/ATF3/JUN/DUSP5/CXCL8/DUSP1/ATF2/GADD45A/JUNB/CSRP2/FOS/HBG2/DUSP10/POU2F1/DUSP8/PRKCA/MAPK1/IL6/SOCS3/MAPK9/MAPK3/KAT5/RB1
PODAR_RESPONSE_TO_ADAPHOSTIN_UP	PODAR_RESPONSE_TO_ADAPHOSTIN_UP	PODAR_RESPONSE_TO_ADAPHOSTIN_UP	127	0.694937	2.4027	0.00381679	0.0246978	1343	tags=41%, list=7%, signal=38%	DDIT4/DDIT3/ATF3/P4HA2/MAFF/JUN/DUSP5/GLRX/OSER1/PPP1R15A/DNAJB9/CDKN1C/MXI1/MBNL2/DNAJB2/DUSP1/GADD45A/VEGFA/CLK1/YPEL5/C16orf72/CCNG2/MAP1LC3B/DNAJB1/GABARAPL1/SEC24D/HSPA13/CHAC1/TRIB3/ATF4/PMAIP1/KLF6/TNFSF9/ISG20/MACO1/EIF2AK3/HBP1/RND3/SAT1/HMOX1/GAB2/DNAJB4/IGFBP3/WDR26/TES/NFE2L1/RAB9A/CD55/BBC3/NAP1L1/CSGALNACT2/TUBB2A
GROSS_HYPOXIA_VIA_ELK3_AND_HIF1A_UP	GROSS_HYPOXIA_VIA_ELK3_AND_HIF1A_UP	GROSS_HYPOXIA_VIA_ELK3_AND_HIF1A_UP	137	0.695225	2.41346	0.00393701	0.025039	1283	tags=36%, list=7%, signal=34%	ANGPTL4/BNIP3/NDRG1/P4HA1/SLC2A1/ATF3/HILPDA/GBE1/MXD1/INSIG2/HK2/ENO2/CSRNP1/DUSP16/SIAH2/FAM162A/AK4/MXI1/NOCT/HBEGF/VEGFA/ZFP36/GPRC5A/ETS1/PFKFB3/SMOX/KLF4/SDC4/PGK1/JMJD6/FOS/ERRFI1/JAG1/ANXA2/KLF6/DUSP4/SPRY4/SAT1/EGR1/PGAM1/PTGER4/DNAJB4/TPI1/RBPJ/TM4SF1/PIM3/NAP1L1/WSB1/TGIF1
SCIBETTA_KDM5B_TARGETS_UP	SCIBETTA_KDM5B_TARGETS_UP	SCIBETTA_KDM5B_TARGETS_UP	19	0.695476	1.6913	0.0108401	0.0387108	556	tags=32%, list=3%, signal=31%	DDIT3/OSER1/GADD45A/CLCF1/SMOX/SAT1
MALIK_REPRESSED_BY_ESTROGEN	MALIK_REPRESSED_BY_ESTROGEN	MALIK_REPRESSED_BY_ESTROGEN	13	0.695557	1.55443	0.044335	0.106192	1014	tags=46%, list=5%, signal=44%	NDRG1/CLDN4/KLF6/CXCR4/BMP7/CDH3
MOOTHA_GLUCONEOGENESIS	MOOTHA_GLUCONEOGENESIS	MOOTHA_GLUCONEOGENESIS	31	0.69566	1.90553	0.00273973	0.0246978	643	tags=23%, list=3%, signal=22%	ALDOC/GPI/LDHA/ENO2/ALDOA/PGK1/TPI1
GROSS_HYPOXIA_VIA_ELK3_DN	GROSS_HYPOXIA_VIA_ELK3_DN	GROSS_HYPOXIA_VIA_ELK3_DN	146	0.69568	2.41318	0.00420168	0.0251321	1373	tags=33%, list=7%, signal=31%	ADM/NDRG1/SLC2A1/ATF3/BHLHE40/NFIL3/HILPDA/GBE1/CSRNP1/HSPA5/PPP1R15A/SIAH2/PTGS2/NOCT/GADD45A/HBEGF/VEGFA/ZFP36/ETS1/PFKFB3/AKAP12/SMOX/KLF4/FOS/ERRFI1/ATF4/JAG1/XBP1/KLF6/RAD23B/ACBD3/DUSP4/SAT1/EGR1/FGD6/PTGER4/MTHFD2/RBPJ/ITGA6/ADIPOR2/ACSL4/LAMP2/TM4SF1/PIM3/ATXN2L/TGIF1/MYH9/FBXO42
REACTOME_ADHERENS_JUNCTIONS_INTERACTIONS	REACTOME_ADHERENS_JUNCTIONS_INTERACTIONS	REACTOME_ADHERENS_JUNCTIONS_INTERACTIONS	32	0.696017	1.91427	0.00273973	0.0246978	1844	tags=28%, list=10%, signal=25%	ANG/CDH1/NECTIN2/ACTB/JUP/ACTG1/CDH3/CTNNA1/CDH6
BIOCARTA_CCR3_PATHWAY	BIOCARTA_CCR3_PATHWAY	BIOCARTA_CCR3_PATHWAY	19	0.696855	1.69465	0.0108401	0.0387108	2731	tags=58%, list=14%, signal=50%	MAP2K1/PPP1R12B/GNAQ/PRKCA/MAPK1/MAPK3/MYL2/PLCB1/GNAS/CCL11/HRAS
KEGG_FRUCTOSE_AND_MANNOSE_METABOLISM	KEGG_FRUCTOSE_AND_MANNOSE_METABOLISM	KEGG_FRUCTOSE_AND_MANNOSE_METABOLISM	32	0.696993	1.91695	0.00273973	0.0246978	643	tags=28%, list=3%, signal=27%	ALDOC/PFKFB4/HK2/PFKP/ALDOA/HK1/PFKFB3/PFKL/TPI1
WATANABE_ULCERATIVE_COLITIS_WITH_CANCER_UP	WATANABE_ULCERATIVE_COLITIS_WITH_CANCER_UP	WATANABE_ULCERATIVE_COLITIS_WITH_CANCER_UP	18	0.697276	1.66908	0.0132979	0.0458214	2155	tags=33%, list=11%, signal=30%	CDKN1C/LIMCH1/NOL3/PCSK5/STK39/ICA1
AMIT_SERUM_RESPONSE_60_MCF10A	AMIT_SERUM_RESPONSE_60_MCF10A	AMIT_SERUM_RESPONSE_60_MCF10A	54	0.697278	2.13009	0.00302115	0.0246978	1961	tags=44%, list=10%, signal=40%	BHLHE40/NR4A2/DUSP5/CXCL8/PTGS2/MBNL2/HBEGF/ELL2/IRS2/SCD/PMAIP1/TUFT1/EGR1/PTGER4/BMP1/TM4SF1/CALD1/TGIF1/MAP3K8/IER2/PLK2/PIP5K1A/COBLL1/TNFAIP3
BERENJENO_ROCK_SIGNALING_NOT_VIA_RHOA_DN	BERENJENO_ROCK_SIGNALING_NOT_VIA_RHOA_DN	BERENJENO_ROCK_SIGNALING_NOT_VIA_RHOA_DN	45	0.697755	2.04507	0.00304878	0.0246978	2205	tags=47%, list=11%, signal=41%	HSPA5/NR2F2/XBP1/KLF6/SH3GLB1/IGF1R/FERMT2/EGR1/UGCG/WSB1/MYH9/SC5D/F3/IER2/COL4A1/JADE1/PPP1CB/VCL/EXT1/SF3B1/KLF5
BIOCARTA_IL6_PATHWAY	BIOCARTA_IL6_PATHWAY	BIOCARTA_IL6_PATHWAY	20	0.698679	1.72183	0.00810811	0.0317868	2731	tags=55%, list=14%, signal=47%	JUN/MAP2K1/FOS/ELK1/IL6/PTPN11/MAPK3/GRB2/CSNK2A1/JAK1/HRAS
REACTOME_DCC_MEDIATED_ATTRACTIVE_SIGNALING	REACTOME_DCC_MEDIATED_ATTRACTIVE_SIGNALING	REACTOME_DCC_MEDIATED_ATTRACTIVE_SIGNALING	14	0.698694	1.58299	0.037594	0.0948069	2307	tags=50%, list=12%, signal=44%	NCK1/TRIO/CDC42/NTN1/DOCK1/ABLIM1/ABLIM3
PLASARI_NFIC_TARGETS_BASAL_DN	PLASARI_NFIC_TARGETS_BASAL_DN	PLASARI_NFIC_TARGETS_BASAL_DN	19	0.69899	1.69984	0.0108401	0.0387108	1664	tags=32%, list=9%, signal=29%	INSIG1/IGFBP6/AHR/STARD4/ENPEP/RPL39L
ZIRN_TRETINOIN_RESPONSE_UP	ZIRN_TRETINOIN_RESPONSE_UP	ZIRN_TRETINOIN_RESPONSE_UP	17	0.700495	1.68359	0.0201511	0.0618984	4001	tags=53%, list=21%, signal=42%	PLAUR/AKAP12/PLK2/LAMA4/DHRS3/THSD4/RARB/NID2/IQCK
PID_AP1_PATHWAY	PID_AP1_PATHWAY	PID_AP1_PATHWAY	64	0.700632	2.17256	0.003125	0.0246978	1768	tags=33%, list=9%, signal=30%	ATF3/JUN/FOSB/CXCL8/DUSP1/ATF2/ETS1/JUNB/CDKN1B/FOS/FOSL2/EGR1/MT2A/HLA-A/BCL2L11/FOSL1/NFATC1/CDK1/PTEN/DMTF1/IL6
KAN_RESPONSE_TO_ARSENIC_TRIOXIDE	KAN_RESPONSE_TO_ARSENIC_TRIOXIDE	KAN_RESPONSE_TO_ARSENIC_TRIOXIDE	114	0.700717	2.3801	0.00373134	0.0246978	677	tags=29%, list=4%, signal=28%	DDIT4/ADM/SLC2A3/DDIT3/NDRG1/ATF3/TSC22D3/TMEM158/INSIG1/JUN/BNIP3L/ENO2/GLRX/CXCL8/PPP1R15A/FAM162A/AK4/STC2/GDF15/SERPINE1/SLC30A1/MAP1LC3B/GABARAPL1/MT1X/LGALS8/SCD/TRIB3/JAG1/LDLR/GRN/MT1F/HMOX1/MT2A
BIOCARTA_PLATELETAPP_PATHWAY	BIOCARTA_PLATELETAPP_PATHWAY	BIOCARTA_PLATELETAPP_PATHWAY	14	0.701562	1.58948	0.037594	0.0948069	1612	tags=29%, list=8%, signal=26%	SERPINE1/APP/F11/COL4A1
CHEMELLO_SOLEUS_VS_EDL_MYOFIBERS_UP	CHEMELLO_SOLEUS_VS_EDL_MYOFIBERS_UP	CHEMELLO_SOLEUS_VS_EDL_MYOFIBERS_UP	16	0.701662	1.65672	0.0225	0.0666604	2352	tags=25%, list=12%, signal=22%	FHL2/FHL1/TPM2/MYL2
REACTOME_PROSTACYCLIN_SIGNALLING_THROUGH_PROSTACYCLIN_RECEPTOR	REACTOME_PROSTACYCLIN_SIGNALLING_THROUGH_PROSTACYCLIN_RECEPTOR	REACTOME_PROSTACYCLIN_SIGNALLING_THROUGH_PROSTACYCLIN_RECEPTOR	19	0.701786	1.70664	0.0108401	0.0387108	2477	tags=32%, list=13%, signal=28%	GNG8/GNG4/GNG5/GNB2/GNG11/GNAS
SMIRNOV_RESPONSE_TO_IR_2HR_UP	SMIRNOV_RESPONSE_TO_IR_2HR_UP	SMIRNOV_RESPONSE_TO_IR_2HR_UP	50	0.702628	2.09619	0.00315457	0.0246978	1638	tags=42%, list=9%, signal=39%	ATF3/JUN/PPP1R15A/PIM1/GADD45A/GDF15/CLK1/SLC30A1/C16orf72/IER3/SOX9/PMAIP1/TNFSF9/MNT/ELK4/PTGER4/BBC3/FOSL1/RRAD/RNF19B/PLK2
RODRIGUES_NTN1_AND_DCC_TARGETS	RODRIGUES_NTN1_AND_DCC_TARGETS	RODRIGUES_NTN1_AND_DCC_TARGETS	30	0.702944	1.93023	0.00266667	0.0246978	2537	tags=53%, list=13%, signal=46%	CDKN1C/ELF3/MT1X/FOS/BCL3/H19/KLF9/MT1F/MT2A/CAMK2D/PKM/MT1E/KLF10/NFKBIZ/MMD/ARHGEF3
REACTOME_RUNX2_REGULATES_OSTEOBLAST_DIFFERENTIATION	REACTOME_RUNX2_REGULATES_OSTEOBLAST_DIFFERENTIATION	REACTOME_RUNX2_REGULATES_OSTEOBLAST_DIFFERENTIATION	23	0.703047	1.78905	0.00802139	0.0317868	2760	tags=43%, list=14%, signal=37%	HES1/HDAC3/YES1/WWTR1/ABL1/MAPK1/MAPK3/RB1/HEY1/GLI3
HAHTOLA_MYCOSIS_FUNGOIDES_CD4_UP	HAHTOLA_MYCOSIS_FUNGOIDES_CD4_UP	HAHTOLA_MYCOSIS_FUNGOIDES_CD4_UP	57	0.704288	2.16633	0.00306748	0.0246978	662	tags=30%, list=3%, signal=29%	ADM/ATF3/GLRX/CXCL8/PPP1R15A/PTGS2/HBEGF/PLAUR/IER3/PFKFB3/KLF4/KLF6/RAB20/NEU1/EGR1/ZNF185/MANBA
REACTOME_RHO_GTPASES_ACTIVATE_WASPS_AND_WAVES	REACTOME_RHO_GTPASES_ACTIVATE_WASPS_AND_WAVES	REACTOME_RHO_GTPASES_ACTIVATE_WASPS_AND_WAVES	35	0.704407	1.98893	0.00275482	0.0246978	2182	tags=49%, list=11%, signal=43%	ABI2/WASF2/ACTB/NCK1/ACTG1/CYFIP2/WIPF3/NCKIPSD/ARPC2/ABL1/MAPK1/BRK1/CDC42/ABI1/CYFIP1/MAPK3/GRB2
BARRIER_CANCER_RELAPSE_TUMOR_SAMPLE_UP	BARRIER_CANCER_RELAPSE_TUMOR_SAMPLE_UP	BARRIER_CANCER_RELAPSE_TUMOR_SAMPLE_UP	13	0.706965	1.57992	0.0344828	0.0897398	2218	tags=46%, list=12%, signal=41%	CXCL8/DNAJB9/HSPA13/CKS1B/MED21/LYN
PEDERSEN_METASTASIS_BY_ERBB2_ISOFORM_1	PEDERSEN_METASTASIS_BY_ERBB2_ISOFORM_1	PEDERSEN_METASTASIS_BY_ERBB2_ISOFORM_1	42	0.707139	2.05399	0.00293255	0.0246978	1215	tags=40%, list=6%, signal=38%	BHLHE40/MXD1/MAFF/GEM/DUSP5/HBEGF/EPHA2/ERRFI1/MPZL2/CEMIP/DUSP4/SPRY4/EGR1/ELK3/PLEK2/FOSL1/DUSP6
BIOCARTA_GRANULOCYTES_PATHWAY	BIOCARTA_GRANULOCYTES_PATHWAY	BIOCARTA_GRANULOCYTES_PATHWAY	13	0.707747	1.58167	0.0344828	0.0897398	1252	tags=15%, list=7%, signal=14%	CXCL8/ITGB2
BIOCARTA_IL17_PATHWAY	BIOCARTA_IL17_PATHWAY	BIOCARTA_IL17_PATHWAY	15	0.708653	1.62338	0.0231959	0.0684791	758	tags=27%, list=4%, signal=26%	CD34/CXCL8/CD2/IL3
PID_ERBB_NETWORK_PATHWAY	PID_ERBB_NETWORK_PATHWAY	PID_ERBB_NETWORK_PATHWAY	13	0.711375	1.58978	0.0320197	0.0855982	170	tags=23%, list=1%, signal=23%	HBEGF/EGFR/TGFA
PICCALUGA_ANGIOIMMUNOBLASTIC_LYMPHOMA_DN	PICCALUGA_ANGIOIMMUNOBLASTIC_LYMPHOMA_DN	PICCALUGA_ANGIOIMMUNOBLASTIC_LYMPHOMA_DN	128	0.713098	2.47522	0.0037594	0.0246978	1457	tags=45%, list=8%, signal=41%	SLC2A3/TSC22D3/MXD1/JUN/BTG1/KDM3A/NR4A2/TIPARP/CSRNP1/FOSB/IRF2BP2/GADD45B/JMY/PPP1R15A/CBX4/NAMPT/GADD45A/ZFP36/CLK1/YPEL5/PIGA/IDS/SLC30A1/C16orf72/RSRC2/GABARAPL1/KLF4/PER1/EIF1/ETNK1/STK17B/SIK1/CNOT6L/IRS2/PNPLA8/TSC22D2/PMAIP1/KLF6/FBXO33/FOSL2/TP53INP2/PELI1/DUSP4/PTGER4/G3BP2/NR4A3/DUSP10/TOB1/TSPYL2/LINC-PINT/KDM6B/CSGALNACT2/HECA/TUBB2A/MAP3K8/PHF1/MGAT4A
KEGG_PENTOSE_PHOSPHATE_PATHWAY	KEGG_PENTOSE_PHOSPHATE_PATHWAY	KEGG_PENTOSE_PHOSPHATE_PATHWAY	26	0.713564	1.89001	0.00526316	0.0270037	1713	tags=31%, list=9%, signal=28%	ALDOC/GPI/PFKP/ALDOA/PFKL/PGM1/TKT/PRPS2
HUANG_FOXA2_TARGETS_DN	HUANG_FOXA2_TARGETS_DN	HUANG_FOXA2_TARGETS_DN	34	0.713589	1.98676	0.0028169	0.0246978	1743	tags=38%, list=9%, signal=35%	COL13A1/IGFBP6/PLAUR/SRPX/SSBP2/PROS1/ITGB4/CDH3/LEPR/SPP1/CRIP2/TGFBI/TGM2
BIOCARTA_ARENRF2_PATHWAY	BIOCARTA_ARENRF2_PATHWAY	BIOCARTA_ARENRF2_PATHWAY	20	0.713819	1.75914	0.00540541	0.0270037	3233	tags=50%, list=17%, signal=42%	MAFF/JUN/FOS/HMOX1/PRKCA/MAPK1/FXYD2/MAFG/HMOX2/MAPK8
BIOCARTA_SPRY_PATHWAY	BIOCARTA_SPRY_PATHWAY	BIOCARTA_SPRY_PATHWAY	17	0.715142	1.7188	0.0151134	0.0505638	2182	tags=47%, list=11%, signal=42%	SPRY1/EGFR/MAP2K1/CBL/SPRY4/MAPK1/MAPK3/GRB2
REACTOME_NOREPINEPHRINE_NEUROTRANSMITTER_RELEASE_CYCLE	REACTOME_NOREPINEPHRINE_NEUROTRANSMITTER_RELEASE_CYCLE	REACTOME_NOREPINEPHRINE_NEUROTRANSMITTER_RELEASE_CYCLE	18	0.715655	1.71307	0.0106383	0.0384008	1800	tags=33%, list=9%, signal=30%	PPFIA1/SYT1/STXBP1/RAB3A/MAOA/PPFIA4
REACTOME_REVERSIBLE_HYDRATION_OF_CARBON_DIOXIDE	REACTOME_REVERSIBLE_HYDRATION_OF_CARBON_DIOXIDE	REACTOME_REVERSIBLE_HYDRATION_OF_CARBON_DIOXIDE	12	0.715892	1.55956	0.0444444	0.106226	1444	tags=33%, list=8%, signal=31%	CA9/CA12/CA5B/CA13
LI_PROSTATE_CANCER_EPIGENETIC	LI_PROSTATE_CANCER_EPIGENETIC	LI_PROSTATE_CANCER_EPIGENETIC	30	0.716068	1.96627	0.00266667	0.0246978	1489	tags=27%, list=8%, signal=25%	LAMB3/PTGS2/CDH1/RASSF1/LAMC2/LAMA3/HPSE/CAV1
DORSEY_GAB2_TARGETS	DORSEY_GAB2_TARGETS	DORSEY_GAB2_TARGETS	29	0.716514	1.96387	0.0026738	0.0246978	1479	tags=28%, list=8%, signal=26%	DUSP5/SERPINE1/AKAP12/ACVR1/ATP1B1/GSN/PRSS3/SMAD7
KANG_AR_TARGETS_UP	KANG_AR_TARGETS_UP	KANG_AR_TARGETS_UP	17	0.717948	1.72554	0.0125945	0.0439327	1612	tags=24%, list=8%, signal=22%	PDGFA/TUFT1/BMP1/COL4A1
YAO_TEMPORAL_RESPONSE_TO_PROGESTERONE_CLUSTER_5	YAO_TEMPORAL_RESPONSE_TO_PROGESTERONE_CLUSTER_5	YAO_TEMPORAL_RESPONSE_TO_PROGESTERONE_CLUSTER_5	29	0.718279	1.96871	0.0026738	0.0246978	941	tags=38%, list=5%, signal=36%	ADM/ATF3/VEGFA/IER3/KLF4/PER1/ISG20/LCN2/BASP1/PPTC7/WWC1
BURTON_ADIPOGENESIS_PEAK_AT_2HR	BURTON_ADIPOGENESIS_PEAK_AT_2HR	BURTON_ADIPOGENESIS_PEAK_AT_2HR	44	0.719243	2.08675	0.00304878	0.0246978	632	tags=39%, list=3%, signal=37%	ADM/NR4A2/HK2/FOSB/PPP1R15A/PTGS2/DUSP1/ZFP36/SERPINE1/JUNB/NR4A1/IER3/DNAJB1/KLF4/FOS/ERRFI1/DNAJB4
LIU_VAV3_PROSTATE_CARCINOGENESIS_DN	LIU_VAV3_PROSTATE_CARCINOGENESIS_DN	LIU_VAV3_PROSTATE_CARCINOGENESIS_DN	16	0.721508	1.70358	0.0175	0.0561302	882	tags=19%, list=5%, signal=18%	NR4A2/HSPA5/ITGB1
REACTOME_SIGNAL_TRANSDUCTION_BY_L1	REACTOME_SIGNAL_TRANSDUCTION_BY_L1	REACTOME_SIGNAL_TRANSDUCTION_BY_L1	21	0.721797	1.80369	0.00543478	0.0270037	2305	tags=38%, list=12%, signal=34%	EGFR/CSNK2A2/MAP2K1/ITGA5/ITGB1/MAPK1/MAPK3/CSNK2A1
DALESSIO_TSA_RESPONSE	DALESSIO_TSA_RESPONSE	DALESSIO_TSA_RESPONSE	22	0.721809	1.82412	0.00531915	0.0270037	992	tags=32%, list=5%, signal=30%	ATF3/GADD45B/PPP1R15A/FOS/FOSL2/LGALS1/DHRS2
HASINA_NOL7_TARGETS_DN	HASINA_NOL7_TARGETS_DN	HASINA_NOL7_TARGETS_DN	13	0.721953	1.61342	0.0295567	0.0809582	1012	tags=31%, list=5%, signal=29%	VEGFA/EGFR/JAG1/CD55
SATO_SILENCED_BY_DEACETYLATION_IN_PANCREATIC_CANCER	SATO_SILENCED_BY_DEACETYLATION_IN_PANCREATIC_CANCER	SATO_SILENCED_BY_DEACETYLATION_IN_PANCREATIC_CANCER	37	0.724702	2.06	0.0027933	0.0246978	2083	tags=46%, list=11%, signal=41%	ADM/ATF3/ING1/GADD45B/CXCL8/CDKN1C/GDF15/PER1/HMOX1/FOXN3/DHRS2/PHC1/HPSE/NOTCH3/CHFR/ULBP2/SERPINI1
HERNANDEZ_MITOTIC_ARREST_BY_DOCETAXEL_2_DN	HERNANDEZ_MITOTIC_ARREST_BY_DOCETAXEL_2_DN	HERNANDEZ_MITOTIC_ARREST_BY_DOCETAXEL_2_DN	15	0.724805	1.66038	0.0154639	0.0514788	1252	tags=40%, list=7%, signal=37%	SPRY1/CDH1/SCD/EGR1/VCAN/ITGB2
COLIN_PILOCYTIC_ASTROCYTOMA_VS_GLIOBLASTOMA_DN	COLIN_PILOCYTIC_ASTROCYTOMA_VS_GLIOBLASTOMA_DN	COLIN_PILOCYTIC_ASTROCYTOMA_VS_GLIOBLASTOMA_DN	28	0.724824	1.96477	0.00542005	0.0270037	1552	tags=29%, list=8%, signal=26%	BHLHE40/EGFR/PLIN2/PGK1/ANXA2/TXNRD1/SPP1/TGFBI
PID_TCR_CALCIUM_PATHWAY	PID_TCR_CALCIUM_PATHWAY	PID_TCR_CALCIUM_PATHWAY	28	0.72535	1.9662	0.00542005	0.0270037	1167	tags=32%, list=6%, signal=30%	JUN/PTGS2/JUNB/FOS/IL3/CABIN1/FOSL1/POU2F1/NFATC1
REACTOME_TFAP2_AP_2_FAMILY_REGULATES_TRANSCRIPTION_OF_GROWTH_FACTORS_AND_THEIR_RECEPTORS	REACTOME_TFAP2_AP_2_FAMILY_REGULATES_TRANSCRIPTION_OF_GROWTH_FACTORS_AND_THEIR_RECEPTORS	REACTOME_TFAP2_AP_2_FAMILY_REGULATES_TRANSCRIPTION_OF_GROWTH_FACTORS_AND_THEIR_RECEPTORS	13	0.725532	1.62142	0.0295567	0.0809582	3358	tags=69%, list=17%, signal=57%	VEGFA/EGFR/TGFA/TFAP2A/ATAD2/TFAP2C/KIT/TFAP2B/YY1
REACTOME_GABA_SYNTHESIS_RELEASE_REUPTAKE_AND_DEGRADATION	REACTOME_GABA_SYNTHESIS_RELEASE_REUPTAKE_AND_DEGRADATION	REACTOME_GABA_SYNTHESIS_RELEASE_REUPTAKE_AND_DEGRADATION	18	0.727911	1.74241	0.0106383	0.0384008	528	tags=22%, list=3%, signal=22%	GAD1/SYT1/STXBP1/RAB3A
SCHMIDT_POR_TARGETS_IN_LIMB_BUD_UP	SCHMIDT_POR_TARGETS_IN_LIMB_BUD_UP	SCHMIDT_POR_TARGETS_IN_LIMB_BUD_UP	25	0.72846	1.90575	0.00536193	0.0270037	1459	tags=48%, list=8%, signal=44%	MSMO1/INSIG1/SCD/FDFT1/LDLR/HMGCS1/MVK/SREBF2/SQLE/CYP51A1/STARD4/SC5D
MANALO_HYPOXIA_UP	MANALO_HYPOXIA_UP	MANALO_HYPOXIA_UP	191	0.728823	2.61014	0.0044843	0.0259945	1647	tags=36%, list=9%, signal=33%	ANGPTL4/DDIT4/ADM/BNIP3/SLC2A3/NDRG1/P4HA1/HES1/BHLHE40/GBE1/P4HA2/MAFF/KDM3A/BNIP3L/EGLN1/ENO2/TMEM45A/GADD45B/PLOD2/CDKN1C/AK4/MXI1/STC2/VEGFA/SERPINE1/RNASE4/CCNG2/IER3/PLOD1/SIK1/BCL6/ATP2C1/CASK/PPP1R13L/WASF2/NARF/LIMCH1/RRAS/CXCR4/FNDC3B/TCF7L1/CHSY1/IGFBP3/CDK19/RASSF2/CREB3L2/KANK3/DIAPH2/ZNF292/ATXN1/NUAK1/LEPR/TRIO/NAP1L1/TLE1/DUSP6/ZHX2/PAM/PGM1/HLA-E/AXL/OPN3/HIVEP2/LAMB1/PDGFB/TGFBI…
BERENJENO_TRANSFORMED_BY_RHOA_FOREVER_UP	BERENJENO_TRANSFORMED_BY_RHOA_FOREVER_UP	BERENJENO_TRANSFORMED_BY_RHOA_FOREVER_UP	21	0.7292	1.82219	0.00543478	0.0270037	1450	tags=24%, list=8%, signal=22%	DDIT3/GBE1/GADD45A/NR1D2/MT1E
DIRMEIER_LMP1_RESPONSE_EARLY	DIRMEIER_LMP1_RESPONSE_EARLY	DIRMEIER_LMP1_RESPONSE_EARLY	60	0.729277	2.242	0.00314465	0.0246978	2235	tags=45%, list=12%, signal=40%	HERPUD1/INSIG1/JUN/DUSP5/GADD45B/PPP1R15A/SIAH2/ZFP36/JUNB/EIF1/KLF6/HMGCS1/TNFSF9/ACTB/EGR1/JUP/EEF1A1/IRF7/FTH1/MAN2B1/IER2/NFKB2/EGR2/MCL1/TNFAIP3/NFKBIZ/TRAF4
HORTON_SREBF_TARGETS	HORTON_SREBF_TARGETS	HORTON_SREBF_TARGETS	22	0.72933	1.84313	0.00531915	0.0270037	2184	tags=64%, list=11%, signal=56%	ALDOC/INSIG1/ACSS2/FDFT1/LDLR/HMGCS1/RDH11/PCSK9/SQLE/CYP51A1/STARD4/SC5D/AACS/ME1
WANG_METHYLATED_IN_BREAST_CANCER	WANG_METHYLATED_IN_BREAST_CANCER	WANG_METHYLATED_IN_BREAST_CANCER	35	0.733896	2.07219	0.00275482	0.0246978	2384	tags=54%, list=12%, signal=48%	MAFF/GJB3/DUSP1/GADD45A/HBEGF/GDF15/EPHA2/IRS2/KLF6/PTPRG/ZYX/FOSL1/F3/CAV1/CTNNA1/ETV5/CAVIN1/SLC3A2/UPP1
WANG_RESPONSE_TO_FORSKOLIN_UP	WANG_RESPONSE_TO_FORSKOLIN_UP	WANG_RESPONSE_TO_FORSKOLIN_UP	17	0.734475	1.76526	0.0100756	0.0369284	900	tags=35%, list=5%, signal=34%	INSIG1/NGLY1/CRLS1/FADS1/ELK4/GNAI3
VALK_AML_CLUSTER_1	VALK_AML_CLUSTER_1	VALK_AML_CLUSTER_1	26	0.735229	1.9474	0.00526316	0.0270037	2710	tags=46%, list=14%, signal=40%	SLC2A3/ATF3/JUN/NR4A2/FHL1/IRF7/LTBP3/COBLL1/KCNA5/ADGRG6/BLNK/DPP4
ABBUD_LIF_SIGNALING_2_UP	ABBUD_LIF_SIGNALING_2_UP	ABBUD_LIF_SIGNALING_2_UP	12	0.737297	1.60619	0.0296296	0.0809589	849	tags=25%, list=4%, signal=24%	PFKP/JUNB/ATP1B1
BIOCARTA_HES_PATHWAY	BIOCARTA_HES_PATHWAY	BIOCARTA_HES_PATHWAY	12	0.73778	1.60725	0.0296296	0.0809589	1499	tags=33%, list=8%, signal=31%	HES1/GSK3B/RBPJ/DVL1
MISHRA_CARCINOMA_ASSOCIATED_FIBROBLAST_UP	MISHRA_CARCINOMA_ASSOCIATED_FIBROBLAST_UP	MISHRA_CARCINOMA_ASSOCIATED_FIBROBLAST_UP	24	0.739869	1.9036	0.00534759	0.0270037	2134	tags=38%, list=11%, signal=33%	PDGFA/GEM/FOS/SESN2/EGR1/CA12/COL6A2/FGR/CTHRC1
AMIT_EGF_RESPONSE_60_HELA	AMIT_EGF_RESPONSE_60_HELA	AMIT_EGF_RESPONSE_60_HELA	40	0.73999	2.14356	0.00277778	0.0246978	865	tags=48%, list=4%, signal=45%	SLC2A3/HES1/BHLHE40/NR4A2/TIPARP/FOSB/MBNL2/VEGFA/GPRC5A/SERPINE1/PER1/LDLR/PMAIP1/KLF6/CITED2/FOSL2/UGCG/NR4A3/FXR1
SCHOEN_NFKB_SIGNALING	SCHOEN_NFKB_SIGNALING	SCHOEN_NFKB_SIGNALING	31	0.740639	2.02873	0.00273973	0.0246978	722	tags=32%, list=4%, signal=31%	CSRNP1/GADD45B/CXCL8/PTGS2/CDKN1B/KLF4/BCL6/JAG1/PTGER4/IGFBP3
PHONG_TNF_TARGETS_UP	PHONG_TNF_TARGETS_UP	PHONG_TNF_TARGETS_UP	57	0.740733	2.27843	0.00306748	0.0246978	2095	tags=56%, list=11%, signal=50%	ATF3/BHLHE40/JUN/BTG1/GEM/DUSP5/CXCL8/DUSP1/ZFP36/JUNB/IER3/EPHA2/SDC4/FOS/LDLR/LAMC2/KLF6/EGR1/DUSP10/CEBPD/DUSP8/BIRC2/IER2/NFKB2/LIF/PLK2/IL6/EGR2/MCL1/KDM6A/TNFAIP3/KLF10
REACTOME_AKT_PHOSPHORYLATES_TARGETS_IN_THE_CYTOSOL	REACTOME_AKT_PHOSPHORYLATES_TARGETS_IN_THE_CYTOSOL	REACTOME_AKT_PHOSPHORYLATES_TARGETS_IN_THE_CYTOSOL	13	0.741371	1.65681	0.0270936	0.0761482	1998	tags=46%, list=10%, signal=41%	GSK3B/CDKN1B/MKRN1/BAD/MDM2/TSC2
DAZARD_UV_RESPONSE_CLUSTER_G4	DAZARD_UV_RESPONSE_CLUSTER_G4	DAZARD_UV_RESPONSE_CLUSTER_G4	17	0.742451	1.78443	0.00503778	0.0270037	1633	tags=41%, list=8%, signal=38%	GADD45B/CDKN1C/DUSP1/ZFP36/XBP1/PRSS3/TUBB3
CROONQUIST_STROMAL_STIMULATION_UP	CROONQUIST_STROMAL_STIMULATION_UP	CROONQUIST_STROMAL_STIMULATION_UP	52	0.743048	2.25418	0.00303951	0.0246978	1781	tags=40%, list=9%, signal=37%	TSC22D3/NR4A2/FOSB/PPP1R15A/DUSP1/SERPINE1/IER3/FOS/IGFBP7/BASP1/IGFBP3/PIM2/VCAN/NNMT/TPM2/TGFBI/IER2/TGM2/MYOF/IL6/NOTCH3
RADAEVA_RESPONSE_TO_IFNA1_DN	RADAEVA_RESPONSE_TO_IFNA1_DN	RADAEVA_RESPONSE_TO_IFNA1_DN	10	0.744229	1.56785	0.0452381	0.107126	273	tags=20%, list=1%, signal=20%	PDGFA/FOS
KHETCHOUMIAN_TRIM24_TARGETS_UP	KHETCHOUMIAN_TRIM24_TARGETS_UP	KHETCHOUMIAN_TRIM24_TARGETS_UP	40	0.744662	2.15709	0.00277778	0.0246978	1743	tags=42%, list=9%, signal=39%	PDGFA/CDH1/HBEGF/SERPINE1/JUNB/EMP1/FOS/APP/EGR1/VIM/LGALS1/KRT18/CP/SPP1/COL4A1/SAMD4A/TGM2
AMIT_EGF_RESPONSE_240_MCF10A	AMIT_EGF_RESPONSE_240_MCF10A	AMIT_EGF_RESPONSE_240_MCF10A	21	0.744962	1.86157	0.00543478	0.0270037	1415	tags=33%, list=7%, signal=31%	HERPUD1/INSIG1/TGFA/AKAP12/DUSP4/TUBB2A/GABPB1
REACTOME_TRANSPORT_OF_ORGANIC_ANIONS	REACTOME_TRANSPORT_OF_ORGANIC_ANIONS	REACTOME_TRANSPORT_OF_ORGANIC_ANIONS	11	0.745402	1.59831	0.0381862	0.0957938	309	tags=18%, list=2%, signal=18%	SLCO1B3/SLCO4A1
SEITZ_NEOPLASTIC_TRANSFORMATION_BY_8P_DELETION_DN	SEITZ_NEOPLASTIC_TRANSFORMATION_BY_8P_DELETION_DN	SEITZ_NEOPLASTIC_TRANSFORMATION_BY_8P_DELETION_DN	30	0.746566	2.05002	0.00266667	0.0246978	2548	tags=47%, list=13%, signal=41%	DDIT4/INSIG1/TGFA/GAD1/LIMCH1/CXCR4/SLC19A2/CST6/PHF20/PHF1/CLIP2/SAA1/UQCRC1/PXDN
ONDER_CDH1_TARGETS_3_UP	ONDER_CDH1_TARGETS_3_UP	ONDER_CDH1_TARGETS_3_UP	17	0.74689	1.7951	0.00503778	0.0270037	1564	tags=47%, list=8%, signal=43%	TSC22D3/STC2/RNASE4/KLF9/FTL/LEPR/CRIP2/PRKCA
BIOCARTA_LAIR_PATHWAY	BIOCARTA_LAIR_PATHWAY	BIOCARTA_LAIR_PATHWAY	16	0.747574	1.76512	0.0075	0.0317412	1830	tags=31%, list=10%, signal=28%	CXCL8/ITGB1/ITGB2/IL6/C6
CHO_NR4A1_TARGETS	CHO_NR4A1_TARGETS	CHO_NR4A1_TARGETS	30	0.748491	2.0553	0.00266667	0.0246978	576	tags=27%, list=3%, signal=26%	HERPUD1/DDIT3/ATF3/INSIG1/PPP1R15A/ATF4/KDM5A/HMOX1
DAZARD_UV_RESPONSE_CLUSTER_G24	DAZARD_UV_RESPONSE_CLUSTER_G24	DAZARD_UV_RESPONSE_CLUSTER_G24	18	0.748657	1.79207	0.00531915	0.0270037	1439	tags=44%, list=7%, signal=41%	ZFP36/BCL6/CLDN4/HBP1/TM4SF1/TUBB2A/IFI27/PRSS3
MATTHEWS_AP1_TARGETS	MATTHEWS_AP1_TARGETS	MATTHEWS_AP1_TARGETS	15	0.749215	1.7163	0.0103093	0.0376342	1900	tags=53%, list=10%, signal=48%	SPRY1/PTGS2/HBEGF/PLAUR/BCL3/SPP1/CAV1/LBH
XU_HGF_SIGNALING_NOT_VIA_AKT1_6HR	XU_HGF_SIGNALING_NOT_VIA_AKT1_6HR	XU_HGF_SIGNALING_NOT_VIA_AKT1_6HR	24	0.749916	1.92945	0.00534759	0.0270037	556	tags=29%, list=3%, signal=28%	ANGPTL4/JUN/HBEGF/PLAUR/PFKFB3/HPCAL1/SAT1
SPIELMAN_LYMPHOBLAST_EUROPEAN_VS_ASIAN_2FC_DN	SPIELMAN_LYMPHOBLAST_EUROPEAN_VS_ASIAN_2FC_DN	SPIELMAN_LYMPHOBLAST_EUROPEAN_VS_ASIAN_2FC_DN	17	0.752919	1.80959	0.00503778	0.0270037	965	tags=29%, list=5%, signal=28%	ADM/NFIL3/DNAJB9/MAN2A1/CLEC2D
WINTER_HYPOXIA_METAGENE	WINTER_HYPOXIA_METAGENE	WINTER_HYPOXIA_METAGENE	230	0.753067	2.7598	0.005	0.0270037	1620	tags=47%, list=8%, signal=44%	ANGPTL4/HERPUD1/DDIT4/ALDOC/ADM/BNIP3/SLC2A3/DDIT3/NDRG1/P4HA1/SLC2A1/BHLHE40/NFIL3/PFKFB4/CA9/HILPDA/GBE1/P4HA2/INSIG1/JUN/BTG1/GPI/HK2/BNIP3L/LDHA/AK2/HSPA5/GLRX/CXCL8/PLOD2/SIAH2/MXI1/PTGS2/PIM1/RIOK3/QSOX1/ALDOA/STC2/PDK3/PLAUR/VEGFA/SERPINE1/CLK1/ETS1/HK1/HERC3/ELL2/GAPDH/NR4A1/CDKN1B/CCNG2/TGFA/ELF3/PFKFB3/IRF6/PLIN2/PGK1/BCL2L2/FOS/ERRFI1/ITGA5/ANXA2/NT5E/EIF4A3/CITED2/TPBG/HBP1/SAT1/EGR1/…
MCDOWELL_ACUTE_LUNG_INJURY_UP	MCDOWELL_ACUTE_LUNG_INJURY_UP	MCDOWELL_ACUTE_LUNG_INJURY_UP	39	0.754174	2.18201	0.00273973	0.0246978	1915	tags=36%, list=10%, signal=32%	ANGPTL4/DUSP1/ZFP36/NR4A1/AKAP12/FOS/KLF6/TXNRD1/LCN2/SPP1/TGFBI/LTF/MCL1/EIF1AY
BIOCARTA_CBL_PATHWAY	BIOCARTA_CBL_PATHWAY	BIOCARTA_CBL_PATHWAY	12	0.754269	1.64317	0.0246914	0.0714412	2557	tags=58%, list=13%, signal=51%	EGFR/SH3KBP1/SH3GLB1/CBL/PRKCA/GRB2/CSF1R
KASLER_HDAC7_TARGETS_1_DN	KASLER_HDAC7_TARGETS_1_DN	KASLER_HDAC7_TARGETS_1_DN	16	0.755236	1.78321	0.0075	0.0317412	1540	tags=44%, list=8%, signal=40%	SLC2A1/HK2/IGFBP6/TRIP10/LGMN/SPP1/PARP16
IIZUKA_LIVER_CANCER_PROGRESSION_L1_G1_UP	IIZUKA_LIVER_CANCER_PROGRESSION_L1_G1_UP	IIZUKA_LIVER_CANCER_PROGRESSION_L1_G1_UP	19	0.757179	1.84135	0.00542005	0.0270037	1832	tags=53%, list=10%, signal=48%	BNIP3L/FOS/MT1F/FERMT2/IGFBP3/PRCP/AMFR/CPEB3/MT1E/SLC31A1
KIM_GERMINAL_CENTER_T_HELPER_DN	KIM_GERMINAL_CENTER_T_HELPER_DN	KIM_GERMINAL_CENTER_T_HELPER_DN	11	0.757598	1.62446	0.0286396	0.079292	2799	tags=55%, list=15%, signal=47%	ELL2/PER1/IRS2/DUSP8/RORA/DHRS3
REACTOME_RESPONSE_TO_METAL_IONS	REACTOME_RESPONSE_TO_METAL_IONS	REACTOME_RESPONSE_TO_METAL_IONS	14	0.758935	1.71947	0.0125313	0.043813	3164	tags=57%, list=16%, signal=48%	MT1X/MT1F/MT2A/MT1A/MT1E/MT1M/CSRP1/MT1G
YIH_RESPONSE_TO_ARSENITE_C2	YIH_RESPONSE_TO_ARSENITE_C2	YIH_RESPONSE_TO_ARSENITE_C2	13	0.759352	1.697	0.0197044	0.0608622	1671	tags=54%, list=9%, signal=49%	ATF2/GADD45A/CAST/RAB5A/TCF12/SP3/PPP1CB
SHAFFER_IRF4_TARGETS_IN_PLASMA_CELL_VS_MATURE_B_LYMPHOCYTE	SHAFFER_IRF4_TARGETS_IN_PLASMA_CELL_VS_MATURE_B_LYMPHOCYTE	SHAFFER_IRF4_TARGETS_IN_PLASMA_CELL_VS_MATURE_B_LYMPHOCYTE	60	0.760628	2.33838	0.00314465	0.0246978	1238	tags=43%, list=6%, signal=41%	DDIT3/NDRG1/ATF3/NFIL3/AVPI1/DUSP5/DNAJB9/NAMPT/VEGFA/ZFP36/ELL2/NR4A1/ATF4/LDLR/TUFT1/CANX/GFPT1/HSP90B1/ITPKA/PDIA4/UAP1/PIM2/SPATS2/MAN2A1/SLC12A4/PAM
WANG_NEOPLASTIC_TRANSFORMATION_BY_CCND1_MYC	WANG_NEOPLASTIC_TRANSFORMATION_BY_CCND1_MYC	WANG_NEOPLASTIC_TRANSFORMATION_BY_CCND1_MYC	19	0.761043	1.85075	0.00542005	0.0270037	2541	tags=42%, list=13%, signal=37%	DDIT3/ATF3/TRIB3/IGFBP3/TSPAN6/TSPAN7/ARHGAP6/ARHGAP24
GARGALOVIC_RESPONSE_TO_OXIDIZED_PHOSPHOLIPIDS_SALMON_DN	GARGALOVIC_RESPONSE_TO_OXIDIZED_PHOSPHOLIPIDS_SALMON_DN	GARGALOVIC_RESPONSE_TO_OXIDIZED_PHOSPHOLIPIDS_SALMON_DN	14	0.761451	1.72517	0.0100251	0.0367837	2463	tags=36%, list=13%, signal=31%	CXADR/ARHGEF37/VGLL4/LYN/ADGRG6
REACTOME_ANCHORING_FIBRIL_FORMATION	REACTOME_ANCHORING_FIBRIL_FORMATION	REACTOME_ANCHORING_FIBRIL_FORMATION	14	0.762501	1.72755	0.0100251	0.0367837	1612	tags=36%, list=8%, signal=33%	LAMB3/LAMC2/BMP1/LAMA3/COL4A1
STEIN_ESTROGEN_RESPONSE_NOT_VIA_ESRRA	STEIN_ESTROGEN_RESPONSE_NOT_VIA_ESRRA	STEIN_ESTROGEN_RESPONSE_NOT_VIA_ESRRA	18	0.763731	1.82815	0.00531915	0.0270037	515	tags=22%, list=3%, signal=22%	TIPARP/SIAH2/FHL2/TPBG
GRAHAM_CML_QUIESCENT_VS_NORMAL_DIVIDING_DN	GRAHAM_CML_QUIESCENT_VS_NORMAL_DIVIDING_DN	GRAHAM_CML_QUIESCENT_VS_NORMAL_DIVIDING_DN	11	0.764065	1.63833	0.026253	0.0748568	2547	tags=36%, list=13%, signal=32%	PLS3/SORL1/AIF1/C3orf14
WUNDER_INFLAMMATORY_RESPONSE_AND_CHOLESTEROL_DN	WUNDER_INFLAMMATORY_RESPONSE_AND_CHOLESTEROL_DN	WUNDER_INFLAMMATORY_RESPONSE_AND_CHOLESTEROL_DN	10	0.767466	1.6168	0.0285714	0.0791689	2877	tags=40%, list=15%, signal=34%	CDKN1C/HLA-A/HLA-B/SERPINA1
ONGUSAHA_BRCA1_TARGETS_UP	ONGUSAHA_BRCA1_TARGETS_UP	ONGUSAHA_BRCA1_TARGETS_UP	12	0.767856	1.67277	0.017284	0.0554906	2212	tags=42%, list=11%, signal=37%	DDIT4/GADD45A/HMOX1/TGFBI/COL18A1
HASINA_NOL7_TARGETS_UP	HASINA_NOL7_TARGETS_UP	HASINA_NOL7_TARGETS_UP	13	0.768009	1.71634	0.0197044	0.0608622	1483	tags=46%, list=8%, signal=43%	ADM/PLAUR/NEO1/TFPI/CD99/F3
XU_HGF_TARGETS_INDUCED_BY_AKT1_48HR_UP	XU_HGF_TARGETS_INDUCED_BY_AKT1_48HR_UP	XU_HGF_TARGETS_INDUCED_BY_AKT1_48HR_UP	12	0.768226	1.67357	0.017284	0.0554906	126	tags=25%, list=1%, signal=25%	FOXD1/TNIP1/PLAUR
DAZARD_UV_RESPONSE_CLUSTER_G2	DAZARD_UV_RESPONSE_CLUSTER_G2	DAZARD_UV_RESPONSE_CLUSTER_G2	24	0.771406	1.98474	0.00534759	0.0270037	1045	tags=42%, list=5%, signal=39%	ATF3/CXCL8/GADD45A/JUNB/IER3/ATF4/CLDN4/PMAIP1/CITED2/TOB1
TSUNODA_CISPLATIN_RESISTANCE_UP	TSUNODA_CISPLATIN_RESISTANCE_UP	TSUNODA_CISPLATIN_RESISTANCE_UP	11	0.772417	1.65624	0.026253	0.0748568	1436	tags=36%, list=7%, signal=34%	INSIG1/NT5E/VIM/IFI27
YIH_RESPONSE_TO_ARSENITE_C4	YIH_RESPONSE_TO_ARSENITE_C4	YIH_RESPONSE_TO_ARSENITE_C4	17	0.772911	1.85764	0.00503778	0.0270037	2433	tags=59%, list=13%, signal=51%	JUN/CXCL8/EGFR/ELK1/RAB3A/NCK1/F11R/CDC42/GRB2/KRT8
BIOCARTA_EGFR_SMRTE_PATHWAY	BIOCARTA_EGFR_SMRTE_PATHWAY	BIOCARTA_EGFR_SMRTE_PATHWAY	11	0.773409	1.65836	0.026253	0.0748568	232	tags=27%, list=1%, signal=27%	NCOR2/EGFR/MAP2K1
SHAFFER_IRF4_MULTIPLE_MYELOMA_PROGRAM	SHAFFER_IRF4_MULTIPLE_MYELOMA_PROGRAM	SHAFFER_IRF4_MULTIPLE_MYELOMA_PROGRAM	34	0.773804	2.1544	0.0028169	0.0246978	1966	tags=53%, list=10%, signal=48%	P4HA1/NFIL3/DUSP5/ELL2/CDKN1B/SCD/TUFT1/ISG20/CANX/GFPT1/UAP1/PIM2/MAN2A1/PAM/STAG2/PHKA1/TNFAIP3/IRF4
REACTOME_RESPONSE_OF_EIF2AK1_HRI_TO_HEME_DEFICIENCY	REACTOME_RESPONSE_OF_EIF2AK1_HRI_TO_HEME_DEFICIENCY	REACTOME_RESPONSE_OF_EIF2AK1_HRI_TO_HEME_DEFICIENCY	14	0.774092	1.75381	0.0075188	0.0317412	333	tags=43%, list=2%, signal=42%	DDIT3/ATF3/PPP1R15A/CHAC1/TRIB3/ATF4
QI_HYPOXIA	QI_HYPOXIA	QI_HYPOXIA	130	0.774978	2.69772	0.00378788	0.0246978	1504	tags=46%, list=8%, signal=43%	DDIT4/ALDOC/ADM/BNIP3/NDRG1/P4HA1/SLC2A1/BHLHE40/CA9/GBE1/P4HA2/INSIG1/GPI/HK2/EGLN1/PFKP/PLOD2/SIAH2/AK4/MXI1/ALDOA/DUSP1/VEGFA/HK1/CCNG2/ACSS2/PDXP/IER3/PLOD1/MT1X/SOX9/PLEKHA2/JMJD6/SCD/SAP30/TNFSF9/FOXO3/SERTAD1/KDM4B/ESPN/HMOX1/PGAM1/CD109/PFKL/RNF19A/TRERF1/IGFBP3/SLC19A2/LPIN1/ADIPOR2/BCL2L11/SQLE/HMGCL/COL12A1/FAM117B/CYP51A1/PGM1/NAA80/HPSE/SH3YL1
PACHER_TARGETS_OF_IGF1_AND_IGF2_UP	PACHER_TARGETS_OF_IGF1_AND_IGF2_UP	PACHER_TARGETS_OF_IGF1_AND_IGF2_UP	34	0.775426	2.15892	0.0028169	0.0246978	370	tags=26%, list=2%, signal=26%	HERPUD1/DDIT3/BHLHE40/DNAJB9/GADD45A/VEGFA/GDF15/SEC24D/SESN2
AMIT_EGF_RESPONSE_40_HELA	AMIT_EGF_RESPONSE_40_HELA	AMIT_EGF_RESPONSE_40_HELA	41	0.777817	2.25266	0.00284091	0.0246978	562	tags=44%, list=3%, signal=43%	SLC2A3/HES1/ATF3/JUN/DUSP5/PPP1R15A/PTGS2/MBNL2/CBX4/DUSP1/ZFP36/JUNB/NR4A1/IER3/BCL3/LDLR/KLF6/EGR1
GRAHAM_CML_QUIESCENT_VS_NORMAL_DIVIDING_UP	GRAHAM_CML_QUIESCENT_VS_NORMAL_DIVIDING_UP	GRAHAM_CML_QUIESCENT_VS_NORMAL_DIVIDING_UP	55	0.777979	2.3871	0.00301205	0.0246978	1352	tags=27%, list=7%, signal=25%	DDIT4/MAFF/JUN/NR4A2/GADD45B/CXCL8/PTGS2/RSRC2/BCL3/PMAIP1/XIST/FXR1/HBG1/TUBB2A/RRAS2
MOOTHA_GLYCOLYSIS	MOOTHA_GLYCOLYSIS	MOOTHA_GLYCOLYSIS	21	0.778776	1.94607	0.00271739	0.0246978	1368	tags=43%, list=7%, signal=40%	ALDOC/GPI/ENO2/ALDOA/HK1/PGK1/TPI1/PGM1/PKM
PID_HIF2PATHWAY	PID_HIF2PATHWAY	PID_HIF2PATHWAY	31	0.779215	2.1344	0.00273973	0.0246978	473	tags=32%, list=2%, signal=32%	SLC2A1/BHLHE40/EGLN1/VEGFA/SERPINE1/ETS1/PGK1/EPAS1/CITED2/ELK1
REACTOME_FOXO_MEDIATED_TRANSCRIPTION_OF_CELL_CYCLE_GENES	REACTOME_FOXO_MEDIATED_TRANSCRIPTION_OF_CELL_CYCLE_GENES	REACTOME_FOXO_MEDIATED_TRANSCRIPTION_OF_CELL_CYCLE_GENES	17	0.781209	1.87759	0.00251889	0.0246978	1739	tags=53%, list=9%, signal=48%	BTG1/GADD45A/CDKN1B/CCNG2/KLF4/FOXO3/SMAD3/CAV1/PCBP4
KANG_FLUOROURACIL_RESISTANCE_DN	KANG_FLUOROURACIL_RESISTANCE_DN	KANG_FLUOROURACIL_RESISTANCE_DN	16	0.784618	1.85259	0.0025	0.0246978	2192	tags=62%, list=11%, signal=55%	DDIT4/SLC2A1/NFYA/LDLR/LAMC2/CALB2/ITGB4/FLNB/S100A14/BACE2
KANG_CISPLATIN_RESISTANCE_UP	KANG_CISPLATIN_RESISTANCE_UP	KANG_CISPLATIN_RESISTANCE_UP	21	0.785061	1.96178	0.00271739	0.0246978	1469	tags=43%, list=8%, signal=40%	MAFF/IGFBP6/TFPI/GRN/JUP/RAC2/EEF1AKMT3/MDK/FTH1
PLASARI_TGFB1_TARGETS_1HR_UP	PLASARI_TGFB1_TARGETS_1HR_UP	PLASARI_TGFB1_TARGETS_1HR_UP	33	0.785582	2.17413	0.00277008	0.0246978	2619	tags=61%, list=14%, signal=52%	HES1/BHLHE40/CSRNP1/GADD45B/PTGS2/HBEGF/SERPINE1/JUNB/NR4A1/IER3/ZMIZ1/SMAD7/LIF/IL6/EGR2/KLF10/SLC20A1/NUAK2/ID1/SNAI1
UZONYI_RESPONSE_TO_LEUKOTRIENE_AND_THROMBIN	UZONYI_RESPONSE_TO_LEUKOTRIENE_AND_THROMBIN	UZONYI_RESPONSE_TO_LEUKOTRIENE_AND_THROMBIN	35	0.787674	2.22404	0.00275482	0.0246978	1483	tags=57%, list=8%, signal=53%	NDRG1/ATF3/NR4A2/GEM/CXCL8/PTGS2/DUSP1/HBEGF/ZFP36/ELL2/NR4A1/KLF4/SIK1/CITED2/FOSL2/EGR1/NR4A3/APOLD1/MAP3K8/F3
AMIT_EGF_RESPONSE_60_MCF10A	AMIT_EGF_RESPONSE_60_MCF10A	AMIT_EGF_RESPONSE_60_MCF10A	37	0.788089	2.24018	0.0027933	0.0246978	2207	tags=51%, list=11%, signal=46%	HES1/BHLHE40/JUN/CXCL8/PTGS2/GADD45A/JUNB/IER3/RND3/EGR1/PTGER4/CALD1/RANBP3/C11orf68/IER2/PLK2/IL6/TNFAIP3/PDLIM5
KIM_LIVER_CANCER_POOR_SURVIVAL_UP	KIM_LIVER_CANCER_POOR_SURVIVAL_UP	KIM_LIVER_CANCER_POOR_SURVIVAL_UP	22	0.790986	1.99894	0.00265957	0.0246978	1926	tags=64%, list=10%, signal=57%	DDIT4/PLOD2/ALDOA/PFKFB3/CXCR4/IGFBP3/TM4SF1/IQGAP1/PKM/ARPC2/LAMB1/F3/JPT1/ETV5
GARGALOVIC_RESPONSE_TO_OXIDIZED_PHOSPHOLIPIDS_BROWN_UP	GARGALOVIC_RESPONSE_TO_OXIDIZED_PHOSPHOLIPIDS_BROWN_UP	GARGALOVIC_RESPONSE_TO_OXIDIZED_PHOSPHOLIPIDS_BROWN_UP	14	0.792055	1.79451	0.00250627	0.0246978	1213	tags=36%, list=6%, signal=33%	SLC2A3/MSMO1/INSIG1/SQLE/CYP51A1
REACTOME_RAF_INDEPENDENT_MAPK1_3_ACTIVATION	REACTOME_RAF_INDEPENDENT_MAPK1_3_ACTIVATION	REACTOME_RAF_INDEPENDENT_MAPK1_3_ACTIVATION	23	0.794248	2.02113	0.0026738	0.0246978	2320	tags=70%, list=12%, signal=61%	DUSP16/DUSP5/DUSP1/MAP2K1/DUSP4/DUSP10/PEA15/DUSP6/DUSP8/CDK1/MAPK1/IL6/DUSP9/PTPN11/MAPK3/JAK1
REACTOME_METALLOTHIONEINS_BIND_METALS	REACTOME_METALLOTHIONEINS_BIND_METALS	REACTOME_METALLOTHIONEINS_BIND_METALS	11	0.796162	1.70715	0.0167064	0.0540523	3164	tags=64%, list=16%, signal=53%	MT1X/MT1F/MT2A/MT1A/MT1E/MT1M/MT1G
CLASPER_LYMPHATIC_VESSELS_DURING_METASTASIS_UP	CLASPER_LYMPHATIC_VESSELS_DURING_METASTASIS_UP	CLASPER_LYMPHATIC_VESSELS_DURING_METASTASIS_UP	20	0.796293	1.96239	0.0027027	0.0246978	1614	tags=40%, list=8%, signal=37%	ADM/SPRY1/PIM1/CXADR/NECTIN2/LEPR/PDGFB/F11R
KRIEG_HYPOXIA_VIA_KDM3A	KRIEG_HYPOXIA_VIA_KDM3A	KRIEG_HYPOXIA_VIA_KDM3A	50	0.796781	2.37708	0.00315457	0.0246978	943	tags=36%, list=5%, signal=34%	ADM/INSIG1/KDM3A/LAMB3/PPP1R15A/RRAGD/PLAUR/GDF15/SERPINE1/JUNB/LAMC2/VEZT/HMOX1/IL1RAP/ASPH/SYTL3/SEC14L2/TM4SF1
NAGASHIMA_EGF_SIGNALING_UP	NAGASHIMA_EGF_SIGNALING_UP	NAGASHIMA_EGF_SIGNALING_UP	53	0.797407	2.4273	0.00297619	0.0246978	1651	tags=60%, list=9%, signal=55%	HES1/ATF3/BHLHE40/MAFF/JUN/NR4A2/TIPARP/GEM/FOSB/DUSP5/DUSP1/HBEGF/ZFP36/JUNB/NR4A1/IER3/EPHA2/DNAJB1/SIK1/FOS/KLF6/EGR1/RYBP/NR4A3/FOSL1/NAB2/NAP1L1/KBTBD2/KDM6B/IER2/LIF/SPRED2
SUH_COEXPRESSED_WITH_ID1_AND_ID2_UP	SUH_COEXPRESSED_WITH_ID1_AND_ID2_UP	SUH_COEXPRESSED_WITH_ID1_AND_ID2_UP	18	0.79874	1.91195	0.00531915	0.0270037	403	tags=39%, list=2%, signal=38%	DDIT3/NDRG1/BHLHE40/GADD45B/DNAJB1/GABARAPL1/RAB20
GROSS_HYPOXIA_VIA_ELK3_ONLY_UP	GROSS_HYPOXIA_VIA_ELK3_ONLY_UP	GROSS_HYPOXIA_VIA_ELK3_ONLY_UP	31	0.802252	2.1975	0.00273973	0.0246978	2316	tags=52%, list=12%, signal=45%	HERPUD1/ADM/NFIL3/EGLN1/PPP1R15A/GADD45A/AKAP12/ATF4/RND3/SPAG9/PGM1/RABGEF1/IL6/PDLIM5/SLC20A1/DHRS9
LIU_IL13_PRIMING_MODEL	LIU_IL13_PRIMING_MODEL	LIU_IL13_PRIMING_MODEL	14	0.803359	1.82012	0.00250627	0.0246978	1154	tags=57%, list=6%, signal=54%	EGFR/JMJD6/FOS/JAG1/SERTAD1/EGR1/EMP3/RAB5B
GROSS_ELK3_TARGETS_DN	GROSS_ELK3_TARGETS_DN	GROSS_ELK3_TARGETS_DN	29	0.803439	2.20213	0.0026738	0.0246978	2384	tags=52%, list=12%, signal=45%	BNIP3/BHLHE40/GBE1/MAFF/CSRNP1/FAM162A/AK4/PTGS2/PGM1/COPE/FTH1/IL6/SOCS3/CNOT7/UPP1
FERRARI_RESPONSE_TO_FENRETINIDE_UP	FERRARI_RESPONSE_TO_FENRETINIDE_UP	FERRARI_RESPONSE_TO_FENRETINIDE_UP	20	0.803814	1.98093	0.0027027	0.0246978	180	tags=40%, list=1%, signal=40%	HERPUD1/DDIT4/DDIT3/ATF3/BHLHE40/PTGS2/GPRC5A/ST3GAL1
ZHENG_RESPONSE_TO_ARSENITE_UP	ZHENG_RESPONSE_TO_ARSENITE_UP	ZHENG_RESPONSE_TO_ARSENITE_UP	14	0.80382	1.82116	0.00250627	0.0246978	1450	tags=50%, list=8%, signal=46%	DNAJB1/MT1X/TXNRD1/HMOX1/MT2A/FOSL1/MT1E
AMIT_EGF_RESPONSE_40_MCF10A	AMIT_EGF_RESPONSE_40_MCF10A	AMIT_EGF_RESPONSE_40_MCF10A	15	0.805079	1.84427	0.00257732	0.0246978	562	tags=53%, list=3%, signal=52%	ADM/JUN/DUSP5/ZFP36/FOS/TUFT1/KLF6/EGR1
WANG_ADIPOGENIC_GENES_REPRESSED_BY_SIRT1	WANG_ADIPOGENIC_GENES_REPRESSED_BY_SIRT1	WANG_ADIPOGENIC_GENES_REPRESSED_BY_SIRT1	25	0.805979	2.10855	0.00268097	0.0246978	643	tags=44%, list=3%, signal=43%	NDRG1/SLC2A1/GPI/PFKP/ALDOA/GAPDH/PDXP/PGK1/SCD/TRIB3/TPI1
TOMIDA_METASTASIS_DN	TOMIDA_METASTASIS_DN	TOMIDA_METASTASIS_DN	14	0.807293	1.82903	0.00250627	0.0246978	1554	tags=64%, list=8%, signal=59%	ENO2/GLRX/CDH1/CLK1/NR4A1/EIF1/SAT1/KRT18/SYBU
PID_HIF1_TFPATHWAY	PID_HIF1_TFPATHWAY	PID_HIF1_TFPATHWAY	65	0.807714	2.51199	0.00308642	0.0246978	1368	tags=45%, list=7%, signal=42%	ADM/BNIP3/NDRG1/SLC2A1/BHLHE40/CA9/JUN/HK2/LDHA/EGLN1/ALDOA/VEGFA/SERPINE1/ETS1/HK1/PFKFB3/PLIN2/PGK1/FOS/NT5E/CITED2/HMOX1/CXCR4/PFKL/SMAD3/ITGB2/PGM1/CP/PKM
REACTOME_TYPE_I_HEMIDESMOSOME_ASSEMBLY	REACTOME_TYPE_I_HEMIDESMOSOME_ASSEMBLY	REACTOME_TYPE_I_HEMIDESMOSOME_ASSEMBLY	11	0.807863	1.73224	0.00954654	0.0354565	2635	tags=64%, list=14%, signal=55%	LAMB3/LAMC2/ITGB4/ITGA6/LAMA3/CD151/KRT14
BIOCARTA_VITCB_PATHWAY	BIOCARTA_VITCB_PATHWAY	BIOCARTA_VITCB_PATHWAY	11	0.808373	1.73333	0.00954654	0.0354565	1634	tags=36%, list=8%, signal=33%	SLC2A3/SLC2A1/COL4A1/P4HB
REACTOME_ACTIVATION_OF_THE_AP_1_FAMILY_OF_TRANSCRIPTION_FACTORS	REACTOME_ACTIVATION_OF_THE_AP_1_FAMILY_OF_TRANSCRIPTION_FACTORS	REACTOME_ACTIVATION_OF_THE_AP_1_FAMILY_OF_TRANSCRIPTION_FACTORS	10	0.809128	1.70457	0.0142857	0.0482298	2073	tags=60%, list=11%, signal=54%	JUN/ATF2/FOS/MAPK1/MAPK9/MAPK3
HARRIS_HYPOXIA	HARRIS_HYPOXIA	HARRIS_HYPOXIA	79	0.811524	2.62121	0.00333333	0.0246978	1768	tags=57%, list=9%, signal=52%	ADM/BNIP3/SLC2A3/DDIT3/P4HA1/SLC2A1/BHLHE40/CA9/JUN/HK2/BNIP3L/LDHA/PFKP/CXCL8/PTGS2/ALDOA/PLAUR/VEGFA/HK1/GAPDH/CDKN1B/CCNG2/TGFA/PGK1/EPAS1/FOS/SAT1/HMOX1/VIM/PFKL/IGFBP3/IGFBP2/FTL/CA12/CP/SPP1/PKM/CD99/F3/PDGFB/AK3/ENPEP/MIF/TGM2/IL6
GROSS_HIF1A_TARGETS_DN	GROSS_HIF1A_TARGETS_DN	GROSS_HIF1A_TARGETS_DN	25	0.811679	2.12346	0.00268097	0.0246978	643	tags=40%, list=3%, signal=39%	ADM/BNIP3/GBE1/FAM162A/AK4/GAPDH/PGK1/JMJD6/PFKL/TPI1
GARGALOVIC_RESPONSE_TO_OXIDIZED_PHOSPHOLIPIDS_LIGHTYELLOW_UP	GARGALOVIC_RESPONSE_TO_OXIDIZED_PHOSPHOLIPIDS_LIGHTYELLOW_UP	GARGALOVIC_RESPONSE_TO_OXIDIZED_PHOSPHOLIPIDS_LIGHTYELLOW_UP	11	0.812428	1.74203	0.00477327	0.0268953	1959	tags=73%, list=10%, signal=65%	PIM1/PNPLA8/RBBP6/UGDH/CSGALNACT2/ZDHHC18/USP12/GNA13
REACTOME_REGULATION_OF_GENE_EXPRESSION_BY_HYPOXIA_INDUCIBLE_FACTOR	REACTOME_REGULATION_OF_GENE_EXPRESSION_BY_HYPOXIA_INDUCIBLE_FACTOR	REACTOME_REGULATION_OF_GENE_EXPRESSION_BY_HYPOXIA_INDUCIBLE_FACTOR	11	0.812884	1.74301	0.00477327	0.0268953	445	tags=36%, list=2%, signal=36%	CA9/VEGFA/EPAS1/CITED2
BIOCARTA_LYM_PATHWAY	BIOCARTA_LYM_PATHWAY	BIOCARTA_LYM_PATHWAY	13	0.814264	1.81972	0.00246305	0.0246978	1252	tags=31%, list=7%, signal=29%	CD34/CXCL8/ITGB1/ITGB2
REACTOME_ATF6_ATF6_ALPHA_ACTIVATES_CHAPERONES	REACTOME_ATF6_ATF6_ALPHA_ACTIVATES_CHAPERONES	REACTOME_ATF6_ATF6_ALPHA_ACTIVATES_CHAPERONES	11	0.814293	1.74603	0.00477327	0.0268953	569	tags=55%, list=3%, signal=53%	DDIT3/HSPA5/ATF4/NFYA/XBP1/HSP90B1
NOJIMA_SFRP2_TARGETS_UP	NOJIMA_SFRP2_TARGETS_UP	NOJIMA_SFRP2_TARGETS_UP	27	0.819154	2.19696	0.0026455	0.0246978	834	tags=44%, list=4%, signal=43%	MXD1/JUN/BTG1/TNFRSF10D/HSPA5/GADD45B/PPP1R15A/GADD45A/CLK1/TRIB3/DEDD2/NR4A3
GARGALOVIC_RESPONSE_TO_OXIDIZED_PHOSPHOLIPIDS_RED_UP	GARGALOVIC_RESPONSE_TO_OXIDIZED_PHOSPHOLIPIDS_RED_UP	GARGALOVIC_RESPONSE_TO_OXIDIZED_PHOSPHOLIPIDS_RED_UP	16	0.819506	1.93497	0.0025	0.0246978	948	tags=44%, list=5%, signal=42%	DDIT4/STC2/VEGFA/CHAC1/ATF4/MTHFD2/NCEH1
AMIT_EGF_RESPONSE_20_HELA	AMIT_EGF_RESPONSE_20_HELA	AMIT_EGF_RESPONSE_20_HELA	10	0.820363	1.72824	0.0119048	0.0418855	273	tags=40%, list=1%, signal=39%	JUN/GADD45B/PPP1R15A/FOS
REACTOME_FOXO_MEDIATED_TRANSCRIPTION_OF_CELL_DEATH_GENES	REACTOME_FOXO_MEDIATED_TRANSCRIPTION_OF_CELL_DEATH_GENES	REACTOME_FOXO_MEDIATED_TRANSCRIPTION_OF_CELL_DEATH_GENES	15	0.828018	1.89682	0.00257732	0.0246978	1016	tags=53%, list=5%, signal=51%	DDIT3/BCL6/NFYA/FOXO3/CITED2/PINK1/BCL2L11/BBC3
KOBAYASHI_EGFR_SIGNALING_6HR_DN	KOBAYASHI_EGFR_SIGNALING_6HR_DN	KOBAYASHI_EGFR_SIGNALING_6HR_DN	16	0.830001	1.95974	0.0025	0.0246978	1483	tags=69%, list=8%, signal=64%	MAFF/JUN/DUSP5/VEGFA/TGFA/IER3/EPHA2/DUSP4/FOSL1/DUSP6/F3
HOLLEMAN_PREDNISOLONE_RESISTANCE_B_ALL_DN	HOLLEMAN_PREDNISOLONE_RESISTANCE_B_ALL_DN	HOLLEMAN_PREDNISOLONE_RESISTANCE_B_ALL_DN	12	0.830424	1.80907	0.00246914	0.0246978	386	tags=33%, list=2%, signal=33%	SLC2A3/MAFF/GAPDH/NECTIN2
VANDESLUIS_COMMD1_TARGETS_GROUP_4_UP	VANDESLUIS_COMMD1_TARGETS_GROUP_4_UP	VANDESLUIS_COMMD1_TARGETS_GROUP_4_UP	17	0.83523	2.00742	0.00251889	0.0246978	1120	tags=35%, list=6%, signal=33%	SLC2A3/SLC2A1/APOOL/NR6A1/KRT18/LGMN
MAINA_VHL_TARGETS_DN	MAINA_VHL_TARGETS_DN	MAINA_VHL_TARGETS_DN	13	0.842062	1.88184	0.00246305	0.0246978	1483	tags=69%, list=8%, signal=64%	BNIP3/BHLHE40/GBE1/ENO2/VEGFA/CLDN4/GNG4/SLC16A3/F3
SESTO_RESPONSE_TO_UV_C3	SESTO_RESPONSE_TO_UV_C3	SESTO_RESPONSE_TO_UV_C3	17	0.846812	2.03526	0.00251889	0.0246978	541	tags=59%, list=3%, signal=57%	ATF3/CXCL8/PTGS2/DUSP1/HBEGF/IER3/SOX9/PMAIP1/BRD2/RND3
GENTILE_UV_HIGH_DOSE_UP	GENTILE_UV_HIGH_DOSE_UP	GENTILE_UV_HIGH_DOSE_UP	19	0.850004	2.06709	0.00271003	0.0246978	1439	tags=53%, list=7%, signal=49%	ATF3/TSC22D3/COL13A1/GADD45A/HBEGF/PMAIP1/ISG15/SAT1/RRAD/PRSS3
SHI_SPARC_TARGETS_DN	SHI_SPARC_TARGETS_DN	SHI_SPARC_TARGETS_DN	11	0.854623	1.83251	0.00238663	0.0246978	1438	tags=55%, list=7%, signal=50%	HILPDA/AHR/BBC3/ITGB2/MAP3K8/MAPK15
LEE_LIVER_CANCER_HEPATOBLAST	LEE_LIVER_CANCER_HEPATOBLAST	LEE_LIVER_CANCER_HEPATOBLAST	16	0.85734	2.0243	0.0025	0.0246978	1768	tags=56%, list=9%, signal=51%	PTGS2/PLAUR/NR4A1/FOS/VIM/KRT7/LAMA3/F3/IL6
AMIT_SERUM_RESPONSE_40_MCF10A	AMIT_SERUM_RESPONSE_40_MCF10A	AMIT_SERUM_RESPONSE_40_MCF10A	27	0.858872	2.30348	0.0026455	0.0246978	1120	tags=56%, list=6%, signal=52%	ADM/ATF3/JUN/NR4A2/FOSB/DUSP1/NAMPT/ZFP36/NR4A1/FOS/KLF6/CITED2/EGR1/CLIC4/LGMN
BIOCARTA_ACTINY_PATHWAY	BIOCARTA_ACTINY_PATHWAY	BIOCARTA_ACTINY_PATHWAY	10	0.861698	1.81532	0.0047619	0.0268953	655	tags=30%, list=3%, signal=29%	ABI2/WASF2/NCK1
PARK_TRETINOIN_RESPONSE	PARK_TRETINOIN_RESPONSE	PARK_TRETINOIN_RESPONSE	12	0.86175	1.87731	0.00246914	0.0246978	192	tags=25%, list=1%, signal=25%	NDRG1/PIM1/SMOX
MENSE_HYPOXIA_UP	MENSE_HYPOXIA_UP	MENSE_HYPOXIA_UP	95	0.862338	2.8677	0.00344828	0.0246978	910	tags=64%, list=5%, signal=61%	ANGPTL4/ANKRD37/ALDOC/ADM/BNIP3/SLC2A3/NDRG1/P4HA1/ATF3/BHLHE40/NFIL3/PFKFB4/HILPDA/GBE1/P4HA2/MAFF/INSIG2/INSIG1/GPI/KDM3A/HK2/BNIP3L/TIPARP/EGLN1/ENO2/WDR54/ANG/PLOD2/PPP1R15A/FOXD1/FAM162A/MXI1/KIAA2013/RIOK3/DPCD/STC2/NAMPT/GADD45A/VEGFA/RNASE4/CLK3/ELL2/PFKFB3/SERGEF/KLF4/PLIN2/PGK1/JMJD6/SCD/ZBTB25/FAM110C/TC2N/HCFC1R1/KDM4B/KDM4C/FUT11/ASPH/CDK19/RBPJ/EEF1AKMT3/NOL3
AMIT_DELAYED_EARLY_GENES	AMIT_DELAYED_EARLY_GENES	AMIT_DELAYED_EARLY_GENES	18	0.862488	2.06454	0.00265957	0.0246978	1244	tags=67%, list=6%, signal=62%	HES1/ATF3/BHLHE40/MAFF/ZFP36/JUNB/KLF6/FOSL2/RBMS1/FOSL1/NAB2/PIAS1
ELVIDGE_HYPOXIA_UP	ELVIDGE_HYPOXIA_UP	ELVIDGE_HYPOXIA_UP	159	0.864503	3.05655	0.004	0.0251198	1573	tags=63%, list=8%, signal=58%	ANGPTL4/DDIT4/ALDOC/ADM/BNIP3/NDRG1/P4HA1/SLC2A1/ATF3/BHLHE40/NFIL3/CA9/SPRY1/HILPDA/GBE1/P4HA2/MAFF/INSIG2/JUN/KDM3A/HK2/BNIP3L/TIPARP/EGLN1/ENO2/TMEM45A/PFKP/GLRX/GADD45B/ANG/FAM162A/RRAGD/AK4/MXI1/PIM1/QSOX1/DUSP1/STC2/PLAUR/VEGFA/GDF15/GPRC5A/SERPINE1/RNASE4/EGFR/KRT15/SRPX/CCNG2/ELF3/PFKFB3/AKAP12/CSRP2/SOX9/PLIN2/PGK1/FAM216A/FOS/YEATS2/SLCO4A1/ARTN/KLF6/ISG20/CITED2/HCFC1R1/LIMCH1/SCARB1/D…
VANDESLUIS_COMMD1_TARGETS_GROUP_2_UP	VANDESLUIS_COMMD1_TARGETS_GROUP_2_UP	VANDESLUIS_COMMD1_TARGETS_GROUP_2_UP	15	0.866697	1.98542	0.00257732	0.0246978	497	tags=53%, list=3%, signal=52%	BNIP3/MAFF/HK2/PFKP/STC2/VEGFA/PFKFB3/ESRP1
KRIGE_AMINO_ACID_DEPRIVATION	KRIGE_AMINO_ACID_DEPRIVATION	KRIGE_AMINO_ACID_DEPRIVATION	24	0.867481	2.23194	0.0026738	0.0246978	370	tags=50%, list=2%, signal=49%	DDIT4/DDIT3/ATF3/CXCL8/PPP1R15A/STC2/GADD45A/VEGFA/CCNG2/CHAC1/TRIB3/SESN2
TIAN_TNF_SIGNALING_NOT_VIA_NFKB	TIAN_TNF_SIGNALING_NOT_VIA_NFKB	TIAN_TNF_SIGNALING_NOT_VIA_NFKB	22	0.869628	2.19769	0.00265957	0.0246978	562	tags=50%, list=3%, signal=49%	INSIG1/JUN/TIPARP/FOSB/PPP1R15A/JUNB/NR4A1/IER3/KLF6/MNT/EGR1
PEDERSEN_METASTASIS_BY_ERBB2_ISOFORM_5	PEDERSEN_METASTASIS_BY_ERBB2_ISOFORM_5	PEDERSEN_METASTASIS_BY_ERBB2_ISOFORM_5	10	0.870439	1.83373	0.00238095	0.0246978	1226	tags=70%, list=6%, signal=66%	NR4A2/NR4A1/S100A10/FOS/HMGCS1/PTGER4/NAB1
PRAMOONJAGO_SOX4_TARGETS_UP	PRAMOONJAGO_SOX4_TARGETS_UP	PRAMOONJAGO_SOX4_TARGETS_UP	50	0.871738	2.60071	0.00315457	0.0246978	1175	tags=70%, list=6%, signal=66%	ADM/BNIP3/SLC2A3/NDRG1/BHLHE40/NFIL3/MAFF/INSIG2/JUN/BTG1/KDM3A/TIPARP/AK4/MXI1/RIOK3/STC2/VEGFA/GDF15/GPRC5A/SERPINE1/CLK1/CCNG2/IER3/PLIN2/TRIB3/TPBG/RND3/DUSP4/CXCR4/FGD6/TRIM8/SMNDC1/ELF4/NAB2/NAP1L1
ELVIDGE_HIF1A_AND_HIF2A_TARGETS_DN	ELVIDGE_HIF1A_AND_HIF2A_TARGETS_DN	ELVIDGE_HIF1A_AND_HIF2A_TARGETS_DN	98	0.873515	2.90829	0.00353357	0.0246978	1489	tags=65%, list=8%, signal=61%	ANGPTL4/ALDOC/ADM/BNIP3/NDRG1/P4HA1/SLC2A1/BHLHE40/CA9/HILPDA/GBE1/P4HA2/INSIG2/HK2/BNIP3L/EGLN1/ENO2/TMEM45A/GLRX/ANG/FAM162A/RRAGD/AK4/MXI1/QSOX1/PLAUR/VEGFA/GPRC5A/SERPINE1/RNASE4/EGFR/KRT15/SRPX/CCNG2/PFKFB3/AKAP12/CSRP2/SOX9/PLIN2/PGK1/FOS/YEATS2/CITED2/LIMCH1/DPYSL4/KDM4B/EGR1/CXCR4/ANKZF1/IGFBP3/RBPJ/NOL3/ZNF292/ATXN1/EFNA3/DPYSL2/SH2B2/DSC2/WSB1/PAM/PGM1/GYS1/PDGFB/CAV1
ELVIDGE_HYPOXIA_BY_DMOG_UP	ELVIDGE_HYPOXIA_BY_DMOG_UP	ELVIDGE_HYPOXIA_BY_DMOG_UP	125	0.876566	3.02027	0.00381679	0.0246978	1573	tags=64%, list=8%, signal=59%	ANGPTL4/DDIT4/ALDOC/ADM/BNIP3/NDRG1/P4HA1/SLC2A1/ATF3/BHLHE40/NFIL3/CA9/SPRY1/HILPDA/GBE1/P4HA2/MAFF/INSIG2/JUN/KDM3A/HK2/BNIP3L/EGLN1/ENO2/TMEM45A/PFKP/GLRX/ANG/FAM162A/RRAGD/AK4/MXI1/PIM1/QSOX1/STC2/PLAUR/VEGFA/GDF15/GPRC5A/SERPINE1/RNASE4/EGFR/SRPX/CCNG2/ELF3/PFKFB3/AKAP12/CSRP2/SOX9/PGK1/FOS/YEATS2/SLCO4A1/ARTN/KLF6/ISG20/CITED2/LIMCH1/DPYSL4/CEMIP/SAT1/EGR1/CXCR4/ASPH/RLF/IGFBP3/ZNF292/ATXN1…
DAZARD_UV_RESPONSE_CLUSTER_G28	DAZARD_UV_RESPONSE_CLUSTER_G28	DAZARD_UV_RESPONSE_CLUSTER_G28	15	0.879183	2.01403	0.00257732	0.0246978	445	tags=60%, list=2%, signal=59%	ATF3/GADD45B/CXCL8/PTGS2/GADD45A/IER3/PMAIP1/ANXA2/CITED2
WACKER_HYPOXIA_TARGETS_OF_VHL	WACKER_HYPOXIA_TARGETS_OF_VHL	WACKER_HYPOXIA_TARGETS_OF_VHL	12	0.883787	1.92532	0.00246914	0.0246978	1255	tags=83%, list=7%, signal=78%	ADM/P4HA1/CA9/HK2/ENO2/PFKP/VEGFA/TGFA/IGFBP3/CP
ELVIDGE_HIF1A_TARGETS_DN	ELVIDGE_HIF1A_TARGETS_DN	ELVIDGE_HIF1A_TARGETS_DN	84	0.884514	2.88484	0.00326797	0.0246978	1489	tags=67%, list=8%, signal=62%	ANGPTL4/ALDOC/ADM/BNIP3/NDRG1/P4HA1/SLC2A1/CA9/HILPDA/GBE1/P4HA2/MAFF/INSIG2/HK2/BNIP3L/EGLN1/ENO2/TMEM45A/GLRX/ANG/FAM162A/RRAGD/AK4/MXI1/QSOX1/RNASE4/EGFR/KRT15/SRPX/PFKFB3/CSRP2/PLIN2/PGK1/FOS/YEATS2/ISG20/CITED2/HCFC1R1/DPYSL4/KDM4B/CXCR4/ANKZF1/IGFBP3/RBPJ/NOL3/ZNF292/ATXN1/EFNA3/SH2B2/DSC2/WSB1/PAM/PGM1/GYS1/PDGFB/CAV1
FOURNIER_ACINAR_DEVELOPMENT_EARLY_UP	FOURNIER_ACINAR_DEVELOPMENT_EARLY_UP	FOURNIER_ACINAR_DEVELOPMENT_EARLY_UP	17	0.886097	2.12968	0.00251889	0.0246978	1390	tags=71%, list=7%, signal=66%	BNIP3L/FOSL2/EGR1/IGFBP2/GOLPH3L/CEP57/GSN/LEPR/ZNF277/PPL/SUCLG2/MACROD1
GESERICK_TERT_TARGETS_DN	GESERICK_TERT_TARGETS_DN	GESERICK_TERT_TARGETS_DN	21	0.88847	2.22019	0.00271739	0.0246978	409	tags=62%, list=2%, signal=61%	BHLHE40/NFIL3/FOSB/GADD45B/SIAH2/HBEGF/ZFP36/JUNB/NR4A1/IER3/KLF4/ERRFI1/KLF9
ZHU_SKIL_TARGETS_UP	ZHU_SKIL_TARGETS_UP	ZHU_SKIL_TARGETS_UP	16	0.889681	2.10066	0.0025	0.0246978	165	tags=44%, list=1%, signal=43%	PPP1R15A/GADD45A/VEGFA/SERPINE1/JUNB/EGFR/CCNG2
REACTOME_DISSOLUTION_OF_FIBRIN_CLOT	REACTOME_DISSOLUTION_OF_FIBRIN_CLOT	REACTOME_DISSOLUTION_OF_FIBRIN_CLOT	13	0.89393	1.99775	0.00246305	0.0246978	381	tags=31%, list=2%, signal=30%	PLAUR/SERPINE1/S100A10/ANXA2
SEMENZA_HIF1_TARGETS	SEMENZA_HIF1_TARGETS	SEMENZA_HIF1_TARGETS	35	0.901668	2.54591	0.00275482	0.0246978	768	tags=60%, list=4%, signal=58%	ALDOC/ADM/BNIP3/SLC2A3/SLC2A1/CA9/P4HA2/HK2/LDHA/ALDOA/VEGFA/SERPINE1/HK1/GAPDH/PGK1/CITED2/HMOX1/PFKL/TPI1/IGFBP3/IGFBP2
LEONARD_HYPOXIA	LEONARD_HYPOXIA	LEONARD_HYPOXIA	43	0.902809	2.62584	0.00295858	0.0246978	720	tags=70%, list=4%, signal=67%	DDIT4/BNIP3/SLC2A3/DDIT3/P4HA1/SLC2A1/BHLHE40/NFIL3/PFKFB4/P4HA2/KDM3A/PFKP/CDKN1C/AK4/ALDOA/DUSP1/STC2/VEGFA/SERPINE1/JUNB/CDKN1B/CCNG2/TGFA/PLIN2/PGK1/SIK1/JMJD6/SAP30/FOSL2/PHC2
KIM_HYPOXIA	KIM_HYPOXIA	KIM_HYPOXIA	19	0.903825	2.19797	0.00271003	0.0246978	722	tags=68%, list=4%, signal=66%	ANGPTL4/ALDOC/SLC2A1/JUN/BNIP3L/LDHA/ENO2/PFKP/ALDOA/VEGFA/PLIN2/TPI1/IGFBP3
MIZUKAMI_HYPOXIA_UP	MIZUKAMI_HYPOXIA_UP	MIZUKAMI_HYPOXIA_UP	12	0.904014	1.96939	0.00246914	0.0246978	170	tags=42%, list=1%, signal=41%	ADM/PDGFA/ANG/VEGFA/TGFA
FARDIN_HYPOXIA_11	FARDIN_HYPOXIA_11	FARDIN_HYPOXIA_11	30	0.936502	2.57157	0.00266667	0.0246978	722	tags=83%, list=4%, signal=80%	ANGPTL4/ANKRD37/DDIT4/ALDOC/BNIP3/SLC2A3/NDRG1/BHLHE40/PFKFB4/P4HA2/BTG1/KDM3A/BNIP3L/EGLN1/FAM162A/AK4/MXI1/TNIP1/VEGFA/PLOD1/PGK1/IGF1R/FUT11/TPI1/IGFBP3
Pathways list sorted for increasing enrichment score values (abs es ≥0.60, P-value <0.05) in siNEG 0.5% O2 vs. siNEG 20% O2 experimental condition.

## Sheet: P_siTRAP1 20%O2 vs. siNEG 20%O2
Table SIII. Continued.
row.names	ID	Description	setSize	enrichmentScore	NES	P-value	Q-value	rank	leading_edge	core_enrichment
GRANDVAUX_IFN_RESPONSE_NOT_VIA_IRF3	GRANDVAUX_IFN_RESPONSE_NOT_VIA_IRF3	GRANDVAUX_IFN_RESPONSE_NOT_VIA_IRF3	15	-0.832206	-2.1616	0.00204082	0.0339177	1647	tags=67%, list=9%, signal=61%	IRF7/STAT1/IFITM1/EIF2AK2/IRF9/ADAR/ISG20/IFI6/MX1/IFITM3
BIOCARTA_IL10_PATHWAY	BIOCARTA_IL10_PATHWAY	BIOCARTA_IL10_PATHWAY	13	-0.774541	-1.9066	0.00406504	0.0499737	2951	tags=46%, list=15%, signal=39%	IL10/TNF/IL1A/STAT1/IL10RB/STAT3
BIOCARTA_ETC_PATHWAY	BIOCARTA_ETC_PATHWAY	BIOCARTA_ETC_PATHWAY	10	-0.760821	-1.73961	0.0101215	0.0839237	2906	tags=60%, list=15%, signal=51%	SDHA/UQCRC1/SDHC/SLC25A4/GPD2/SLC25A6
MUELLER_COMMON_TARGETS_OF_AML_FUSIONS_UP	MUELLER_COMMON_TARGETS_OF_AML_FUSIONS_UP	MUELLER_COMMON_TARGETS_OF_AML_FUSIONS_UP	11	-0.741634	-1.74801	0.00804829	0.0734106	4137	tags=64%, list=22%, signal=50%	SOX4/CITED2/CD99/PPP2R5D/JUP/DNM2/PAFAH1B3
REACTOME_ATF6_ATF6_ALPHA_ACTIVATES_CHAPERONES	REACTOME_ATF6_ATF6_ALPHA_ACTIVATES_CHAPERONES	REACTOME_ATF6_ATF6_ALPHA_ACTIVATES_CHAPERONES	11	-0.73288	-1.72737	0.00804829	0.0734106	396	tags=27%, list=2%, signal=27%	ATF4/MBTPS1/DDIT3
BOWIE_RESPONSE_TO_EXTRACELLULAR_MATRIX	BOWIE_RESPONSE_TO_EXTRACELLULAR_MATRIX	BOWIE_RESPONSE_TO_EXTRACELLULAR_MATRIX	16	-0.731772	-1.92352	0.00204918	0.0339177	1904	tags=50%, list=10%, signal=45%	IFIT1/IRF7/STAT1/IFITM1/PSMB8/PSMB9/IFI6/MX1
TSAI_DNAJB4_TARGETS_UP	TSAI_DNAJB4_TARGETS_UP	TSAI_DNAJB4_TARGETS_UP	12	-0.723823	-1.74531	0.00824742	0.0740469	2452	tags=58%, list=13%, signal=51%	SESN2/IFIT1/SERPINB1/STAT1/IFITM1/IRF9/CCNG2
RAMPON_ENRICHED_LEARNING_ENVIRONMENT_EARLY_DN	RAMPON_ENRICHED_LEARNING_ENVIRONMENT_EARLY_DN	RAMPON_ENRICHED_LEARNING_ENVIRONMENT_EARLY_DN	10	-0.705219	-1.61248	0.0263158	0.136149	3015	tags=70%, list=16%, signal=59%	SPTBN1/RXRA/NRGN/PAFAH1B1/CASP6/BAX/CIT
ZHANG_INTERFERON_RESPONSE	ZHANG_INTERFERON_RESPONSE	ZHANG_INTERFERON_RESPONSE	22	-0.704729	-2.04738	0.00201613	0.0339177	2435	tags=41%, list=13%, signal=36%	IRF3/OASL/SP110/STAT1/IFITM1/IRF9/ISG20/MX1/IFITM3
FRIDMAN_SENESCENCE_DN	FRIDMAN_SENESCENCE_DN	FRIDMAN_SENESCENCE_DN	10	-0.704055	-1.60982	0.0263158	0.136149	363	tags=40%, list=2%, signal=39%	CCNB1/ID1/EGR1/CDC25B
IIZUKA_LIVER_CANCER_PROGRESSION_G1_G2_UP	IIZUKA_LIVER_CANCER_PROGRESSION_G1_G2_UP	IIZUKA_LIVER_CANCER_PROGRESSION_G1_G2_UP	12	-0.68818	-1.65937	0.0103093	0.0840905	1429	tags=50%, list=7%, signal=46%	TRAFD1/STAT1/GABARAPL1/LYRM9/UBE2L6/PSME1
WHITESIDE_CISPLATIN_RESISTANCE_UP	WHITESIDE_CISPLATIN_RESISTANCE_UP	WHITESIDE_CISPLATIN_RESISTANCE_UP	10	-0.685968	-1.56846	0.0364372	0.164533	1722	tags=60%, list=9%, signal=55%	ITGB4/RAC1/IFITM1/ERBB3/GDF15/MX1
BOWIE_RESPONSE_TO_TAMOXIFEN	BOWIE_RESPONSE_TO_TAMOXIFEN	BOWIE_RESPONSE_TO_TAMOXIFEN	17	-0.683795	-1.82653	0.00204918	0.0339177	1904	tags=41%, list=10%, signal=37%	IFIT1/IRF7/STAT1/IFITM1/IRF9/IFI6/MX1
SHIN_B_CELL_LYMPHOMA_CLUSTER_6	SHIN_B_CELL_LYMPHOMA_CLUSTER_6	SHIN_B_CELL_LYMPHOMA_CLUSTER_6	12	-0.678392	-1.63577	0.0185567	0.112209	324	tags=25%, list=2%, signal=25%	HOXA1/HOXA7/ID3
REACTOME_FATTY_ACIDS	REACTOME_FATTY_ACIDS	REACTOME_FATTY_ACIDS	13	-0.678369	-1.66986	0.0162602	0.104416	5397	tags=77%, list=28%, signal=55%	CYP2A7/CYP4F12/CYP4F2/CYP2A13/CYP4F3/CYP4B1/CYP2D6/CYP4F22/CYP4A22/CYP2J2
EINAV_INTERFERON_SIGNATURE_IN_CANCER	EINAV_INTERFERON_SIGNATURE_IN_CANCER	EINAV_INTERFERON_SIGNATURE_IN_CANCER	27	-0.667106	-1.99855	0.00204918	0.0339177	1904	tags=48%, list=10%, signal=43%	RXRA/IFIT1/SP110/STAT1/APOBEC3G/EIF2AK2/IRF9/UBE2L6/LY6E/ADAR/IFI6/MX1/TGIF1
GILMORE_CORE_NFKB_PATHWAY	GILMORE_CORE_NFKB_PATHWAY	GILMORE_CORE_NFKB_PATHWAY	10	-0.666783	-1.52459	0.0425101	0.180277	3263	tags=50%, list=17%, signal=42%	NFKBIB/IKBKB/RELB/NFKB2/NFKBIA
REACTOME_BUTYROPHILIN_BTN_FAMILY_INTERACTIONS	REACTOME_BUTYROPHILIN_BTN_FAMILY_INTERACTIONS	REACTOME_BUTYROPHILIN_BTN_FAMILY_INTERACTIONS	10	-0.663349	-1.51674	0.0465587	0.187636	3140	tags=60%, list=16%, signal=50%	XDH/BTN2A1/BTNL8/BTN2A2/PPL/BTN3A2
BARRIER_COLON_CANCER_RECURRENCE_DN	BARRIER_COLON_CANCER_RECURRENCE_DN	BARRIER_COLON_CANCER_RECURRENCE_DN	17	-0.662672	-1.7701	0.00614754	0.0635249	4197	tags=71%, list=22%, signal=55%	EPPK1/PFKL/CDK10/BTBD2/BSG/CITED2/NUCB1/KCNAB1/CTSA/SPPL2B/TSPAN7/STAT2
LUI_THYROID_CANCER_CLUSTER_4	LUI_THYROID_CANCER_CLUSTER_4	LUI_THYROID_CANCER_CLUSTER_4	12	-0.652372	-1.57302	0.0329897	0.155371	4813	tags=58%, list=25%, signal=44%	ZYX/NUPR1/HLA-DRB1/HLA-DPA1/HLA-DQB1/HLA-DRA/PLTP
LY_AGING_MIDDLE_DN	LY_AGING_MIDDLE_DN	LY_AGING_MIDDLE_DN	14	-0.648925	-1.66148	0.016	0.104416	2914	tags=64%, list=15%, signal=55%	KIF11/KIF23/KIF2C/FOXM1/CCNB1/CENPA/CDC20/UBE2C/HMGN2
VERRECCHIA_RESPONSE_TO_TGFB1_C4	VERRECCHIA_RESPONSE_TO_TGFB1_C4	VERRECCHIA_RESPONSE_TO_TGFB1_C4	11	-0.647972	-1.52725	0.0462777	0.187325	3723	tags=55%, list=19%, signal=44%	LAMB1/MMP17/RAC1/TNC/THBS2/MTA1
REACTOME_RETROGRADE_NEUROTROPHIN_SIGNALLING	REACTOME_RETROGRADE_NEUROTROPHIN_SIGNALLING	REACTOME_RETROGRADE_NEUROTROPHIN_SIGNALLING	14	-0.646293	-1.65474	0.016	0.104416	3992	tags=57%, list=21%, signal=45%	AP2B1/AP2A2/AP2S1/NTRK1/CLTA/AP2M1/DNM2/AP2A1
UROSEVIC_RESPONSE_TO_IMIQUIMOD	UROSEVIC_RESPONSE_TO_IMIQUIMOD	UROSEVIC_RESPONSE_TO_IMIQUIMOD	19	-0.642702	-1.7874	0.00601202	0.0634366	2403	tags=47%, list=12%, signal=41%	TRAFD1/RSAD2/IRF7/OASL/STAT1/IFITM1/ISG20/IFI6/MX1
REACTOME_VLDLR_INTERNALISATION_AND_DEGRADATION	REACTOME_VLDLR_INTERNALISATION_AND_DEGRADATION	REACTOME_VLDLR_INTERNALISATION_AND_DEGRADATION	12	-0.633912	-1.52851	0.0453608	0.185591	3992	tags=58%, list=21%, signal=46%	AP2B1/AP2A2/AP2S1/CLTA/AP2M1/AP2A1/NR1H3
BIOCARTA_MHC_PATHWAY	BIOCARTA_MHC_PATHWAY	BIOCARTA_MHC_PATHWAY	14	-0.625977	-1.60272	0.028	0.142554	4422	tags=57%, list=23%, signal=44%	HLA-DRB1/PSMB5/TAP1/HLA-DRB3/PSMB8/HLA-A/HLA-DRA/PSMB9
NAGY_TFTC_COMPONENTS_HUMAN	NAGY_TFTC_COMPONENTS_HUMAN	NAGY_TFTC_COMPONENTS_HUMAN	15	-0.621044	-1.61312	0.0183673	0.112049	1498	tags=40%, list=8%, signal=37%	TAF6L/SGF29/TADA3/TAF6/SAP130/TAF12
MOSERLE_IFNA_RESPONSE	MOSERLE_IFNA_RESPONSE	MOSERLE_IFNA_RESPONSE	25	-0.620461	-1.82635	0.0020284	0.0339177	2403	tags=36%, list=12%, signal=32%	DDX58/RSAD2/IFIT1/TNFSF10/OASL/STAT1/IFITM1/IFIH1/MX1
BENNETT_SYSTEMIC_LUPUS_ERYTHEMATOSUS	BENNETT_SYSTEMIC_LUPUS_ERYTHEMATOSUS	BENNETT_SYSTEMIC_LUPUS_ERYTHEMATOSUS	27	-0.619327	-1.85541	0.00204918	0.0339177	1840	tags=52%, list=10%, signal=47%	IFIT3/IFI35/FPR2/AGRN/PLSCR1/TAP1/TNFSF10/IRF7/OASL/STAT1/LY6E/LGALS3BP/MX1/IFITM3
REACTOME_ERCC6_CSB_AND_EHMT2_G9A_POSITIVELY_REGULATE_RRNA_EXPRESSION	REACTOME_ERCC6_CSB_AND_EHMT2_G9A_POSITIVELY_REGULATE_RRNA_EXPRESSION	REACTOME_ERCC6_CSB_AND_EHMT2_G9A_POSITIVELY_REGULATE_RRNA_EXPRESSION	16	-0.61431	-1.61476	0.0204918	0.119572	2523	tags=44%, list=13%, signal=38%	RBBP4/CHD3/MTA3/MTA2/ERCC6/MTA1/GATAD2B
SCIAN_CELL_CYCLE_TARGETS_OF_TP53_AND_TP73_DN	SCIAN_CELL_CYCLE_TARGETS_OF_TP53_AND_TP73_DN	SCIAN_CELL_CYCLE_TARGETS_OF_TP53_AND_TP73_DN	20	-0.613415	-1.73364	0.00201613	0.0339177	2751	tags=40%, list=14%, signal=34%	KIF22/CCNB1/CDC25C/MAPRE2/AURKA/CDC20/UBE2C/CDC25B
HOLLEMAN_VINCRISTINE_RESISTANCE_ALL_DN	HOLLEMAN_VINCRISTINE_RESISTANCE_ALL_DN	HOLLEMAN_VINCRISTINE_RESISTANCE_ALL_DN	19	-0.605082	-1.68277	0.0140281	0.0979251	2762	tags=47%, list=14%, signal=41%	RASGRP2/CD44/RPS24/HMGB1/RPL23A/RPL12/RPL10/RPS2/NME2
HUMMERICH_BENIGN_SKIN_TUMOR_UP	HUMMERICH_BENIGN_SKIN_TUMOR_UP	HUMMERICH_BENIGN_SKIN_TUMOR_UP	14	-0.603639	-1.54553	0.044	0.182952	1348	tags=21%, list=7%, signal=20%	GSTO1/KRT13/DROSHA
KEGG_OTHER_GLYCAN_DEGRADATION	KEGG_OTHER_GLYCAN_DEGRADATION	KEGG_OTHER_GLYCAN_DEGRADATION	15	-0.600861	-1.5607	0.0306122	0.147992	2599	tags=27%, list=14%, signal=23%	MAN2B1/GBA/NEU1/AGA
YAN_ESCAPE_FROM_ANOIKIS	YAN_ESCAPE_FROM_ANOIKIS	YAN_ESCAPE_FROM_ANOIKIS	23	-0.600813	-1.74932	0.00404858	0.0499737	2403	tags=43%, list=12%, signal=38%	RSAD2/CD44/IRF7/STAT1/HLA-DMA/EIF2AK2/STAT2/ALDH3A1/MX1/DDIT3
REACTOME_RUNX2_REGULATES_OSTEOBLAST_DIFFERENTIATION	REACTOME_RUNX2_REGULATES_OSTEOBLAST_DIFFERENTIATION	REACTOME_RUNX2_REGULATES_OSTEOBLAST_DIFFERENTIATION	23	0.601954	1.75181	0.011811	0.0909318	2952	tags=39%, list=15%, signal=33%	HEY1/MAPK1/YAP1/GLI3/YES1/RB1/WWTR1/CBFB/ABL1
YORDY_RECIPROCAL_REGULATION_BY_ETS1_AND_SP100_UP	YORDY_RECIPROCAL_REGULATION_BY_ETS1_AND_SP100_UP	YORDY_RECIPROCAL_REGULATION_BY_ETS1_AND_SP100_UP	20	0.602277	1.70024	0.013834	0.0979251	1551	tags=35%, list=8%, signal=32%	IGFBP6/USB1/SCARA3/SIRPA/ARRB1/RAP1GDS1/VPS26B
KEGG_P53_SIGNALING_PATHWAY	KEGG_P53_SIGNALING_PATHWAY	KEGG_P53_SIGNALING_PATHWAY	65	0.602705	2.16333	0.00199601	0.0339177	1914	tags=35%, list=10%, signal=32%	CCND1/CCNE1/PMAIP1/CCNE2/TP53I3/SERPINB5/SERPINE1/EI24/CCND3/CDK6/PERP/MDM2/FAS/SIAH1/RRM2B/PTEN/STEAP3/ADGRB1/RCHY1/TP53AIP1/CASP9/CDK1/BBC3
LEE_LIVER_CANCER_HEPATOBLAST	LEE_LIVER_CANCER_HEPATOBLAST	LEE_LIVER_CANCER_HEPATOBLAST	16	0.602759	1.59976	0.0214008	0.123933	836	tags=25%, list=4%, signal=24%	F3/LAMA3/KRT7/NR4A1
ZHENG_RESPONSE_TO_ARSENITE_UP	ZHENG_RESPONSE_TO_ARSENITE_UP	ZHENG_RESPONSE_TO_ARSENITE_UP	14	0.603411	1.55497	0.0398406	0.172584	2143	tags=29%, list=11%, signal=25%	MT2A/GCLM/TXNRD1/MT1E
SCHAEFFER_SOX9_TARGETS_IN_PROSTATE_DEVELOPMENT_UP	SCHAEFFER_SOX9_TARGETS_IN_PROSTATE_DEVELOPMENT_UP	SCHAEFFER_SOX9_TARGETS_IN_PROSTATE_DEVELOPMENT_UP	20	0.605478	1.70928	0.0118577	0.0909318	707	tags=25%, list=4%, signal=24%	MBP/SLC39A8/TLE1/HOXA10/BCL2L1
BIOCARTA_CK1_PATHWAY	BIOCARTA_CK1_PATHWAY	BIOCARTA_CK1_PATHWAY	16	0.605638	1.6074	0.0194553	0.116722	3803	tags=56%, list=20%, signal=45%	PRKACB/CDK5R1/PPP2CA/PLCB1/PRKAR2A/PRKAR1A/PPP3CA/PPP1R1B/PRKAR1B
PID_GLYPICAN_1PATHWAY	PID_GLYPICAN_1PATHWAY	PID_GLYPICAN_1PATHWAY	25	0.608748	1.7982	0.00589391	0.0634366	2823	tags=36%, list=15%, signal=31%	TGFB3/PRNP/NRG1/FGF2/TGFBR2/YES1/APP/TGFBR1/FGR
STANELLE_E2F1_TARGETS	STANELLE_E2F1_TARGETS	STANELLE_E2F1_TARGETS	26	0.608895	1.82527	0.00580271	0.0634366	780	tags=23%, list=4%, signal=22%	CCND1/CCNE1/CCNE2/BAD/FGF2/VEGFB
SNIJDERS_AMPLIFIED_IN_HEAD_AND_NECK_TUMORS	SNIJDERS_AMPLIFIED_IN_HEAD_AND_NECK_TUMORS	SNIJDERS_AMPLIFIED_IN_HEAD_AND_NECK_TUMORS	36	0.609323	1.99201	0.00392157	0.0499737	853	tags=28%, list=4%, signal=27%	CCND1/LAMA3/FZD1/MMP7/CDK6/EGFR/MDM2/ADAM9/YAP1/UHRF2
HOFMANN_MYELODYSPLASTIC_SYNDROM_RISK_UP	HOFMANN_MYELODYSPLASTIC_SYNDROM_RISK_UP	HOFMANN_MYELODYSPLASTIC_SYNDROM_RISK_UP	22	0.60998	1.74735	0.0118577	0.0909318	1410	tags=27%, list=7%, signal=25%	CCND1/MAGEA3/TOM1/FERMT2/GPRC5A/MAGEA6
HE_PTEN_TARGETS_UP	HE_PTEN_TARGETS_UP	HE_PTEN_TARGETS_UP	16	0.610505	1.62032	0.0194553	0.116722	4056	tags=50%, list=21%, signal=39%	ITGB1/CCND3/CDK6/ELK3/ZNF274/RB1/CDKN1A/PDGFA
GARGALOVIC_RESPONSE_TO_OXIDIZED_PHOSPHOLIPIDS_RED_UP	GARGALOVIC_RESPONSE_TO_OXIDIZED_PHOSPHOLIPIDS_RED_UP	GARGALOVIC_RESPONSE_TO_OXIDIZED_PHOSPHOLIPIDS_RED_UP	16	0.610942	1.62148	0.0194553	0.116722	1908	tags=44%, list=10%, signal=39%	NCEH1/MTHFD2/E2F7/SLC7A5/DDX10/STC2/DDIT4
REACTOME_DISSOLUTION_OF_FIBRIN_CLOT	REACTOME_DISSOLUTION_OF_FIBRIN_CLOT	REACTOME_DISSOLUTION_OF_FIBRIN_CLOT	13	0.611719	1.53656	0.0470588	0.188122	1247	tags=31%, list=6%, signal=29%	S100A10/SERPINE1/ANXA2/SERPINE2
REACTOME_TP53_REGULATES_TRANSCRIPTION_OF_GENES_INVOLVED_IN_G1_CELL_CYCLE_ARREST	REACTOME_TP53_REGULATES_TRANSCRIPTION_OF_GENES_INVOLVED_IN_G1_CELL_CYCLE_ARREST	REACTOME_TP53_REGULATES_TRANSCRIPTION_OF_GENES_INVOLVED_IN_G1_CELL_CYCLE_ARREST	13	0.612027	1.53734	0.0470588	0.188122	275	tags=23%, list=1%, signal=23%	CCNE1/CCNE2/E2F7
TERAO_AOX4_TARGETS_HG_UP	TERAO_AOX4_TARGETS_HG_UP	TERAO_AOX4_TARGETS_HG_UP	27	0.612264	1.84367	0.00194553	0.0339177	2225	tags=37%, list=12%, signal=33%	KIAA0930/RNF4/NSF/UBE2V1/MIA2/PEA15/CYTH1/SGPL1/GNA12/TXNDC5
GUILLAUMOND_KLF10_TARGETS_DN	GUILLAUMOND_KLF10_TARGETS_DN	GUILLAUMOND_KLF10_TARGETS_DN	28	0.612527	1.8563	0.00195695	0.0339177	2350	tags=43%, list=12%, signal=38%	TMSB4X/SEC61A1/OSTC/RTN4/AK3/PSME4/CHPT1/RPL7L1/CYB5R3/ELOVL5/ENPEP/SLC2A2
CAIRO_PML_TARGETS_BOUND_BY_MYC_DN	CAIRO_PML_TARGETS_BOUND_BY_MYC_DN	CAIRO_PML_TARGETS_BOUND_BY_MYC_DN	13	0.614369	1.54322	0.045098	0.185109	571	tags=23%, list=3%, signal=22%	CCND1/CDKN2B/CAV1
HASLINGER_B_CLL_WITH_13Q14_DELETION	HASLINGER_B_CLL_WITH_13Q14_DELETION	HASLINGER_B_CLL_WITH_13Q14_DELETION	23	0.616616	1.79448	0.011811	0.0909318	981	tags=30%, list=5%, signal=29%	ITGB5/NT5E/TUBB/ARL4A/BCL7A/LDLR/TPM2
REACTOME_CELL_EXTRACELLULAR_MATRIX_INTERACTIONS	REACTOME_CELL_EXTRACELLULAR_MATRIX_INTERACTIONS	REACTOME_CELL_EXTRACELLULAR_MATRIX_INTERACTIONS	16	0.618389	1.64124	0.0136187	0.0979251	2443	tags=44%, list=13%, signal=38%	ITGB1/ACTB/ACTG1/FERMT2/PARVA/PARVB/ILK
LOPEZ_MESOTHELIOMA_SURVIVAL_OVERALL_DN	LOPEZ_MESOTHELIOMA_SURVIVAL_OVERALL_DN	LOPEZ_MESOTHELIOMA_SURVIVAL_OVERALL_DN	15	0.618836	1.62746	0.0195312	0.116995	21	tags=13%, list=0%, signal=13%	CCND1/TUBB2A
REACTOME_CROSSLINKING_OF_COLLAGEN_FIBRILS	REACTOME_CROSSLINKING_OF_COLLAGEN_FIBRILS	REACTOME_CROSSLINKING_OF_COLLAGEN_FIBRILS	17	0.619786	1.67695	0.00972763	0.0839237	608	tags=24%, list=3%, signal=23%	BMP1/LOXL4/COL4A5/COL4A4
KIM_HYPOXIA	KIM_HYPOXIA	KIM_HYPOXIA	19	0.620374	1.72811	0.00994036	0.0839237	428	tags=21%, list=2%, signal=21%	F3/JUN/LDHA/SLC2A1
ONGUSAHA_BRCA1_TARGETS_UP	ONGUSAHA_BRCA1_TARGETS_UP	ONGUSAHA_BRCA1_TARGETS_UP	12	0.620643	1.54106	0.0444874	0.183981	2044	tags=50%, list=11%, signal=45%	COL18A1/TGFBI/ECM1/DDIT4/MAGEH1/ENPP2
REACTOME_POST_CHAPERONIN_TUBULIN_FOLDING_PATHWAY	REACTOME_POST_CHAPERONIN_TUBULIN_FOLDING_PATHWAY	REACTOME_POST_CHAPERONIN_TUBULIN_FOLDING_PATHWAY	22	0.622387	1.78289	0.00790514	0.0734106	1007	tags=27%, list=5%, signal=26%	TUBB2A/TUBB6/TUBB3/TUBA1C/TUBA4A/TUBA1A
ELVIDGE_HIF1A_AND_HIF2A_TARGETS_UP	ELVIDGE_HIF1A_AND_HIF2A_TARGETS_UP	ELVIDGE_HIF1A_AND_HIF2A_TARGETS_UP	34	0.624159	1.98869	0.004	0.0499737	3473	tags=53%, list=18%, signal=43%	HSPA4/CCND3/SOCS2/FLAD1/SPAG1/ATP6V0A2/CHKA/RFK/GCH1/CORO1A/HSPH1/AUNIP/RRP12/POLR3K/GYG1/ABCF2/SLC25A44/CCDC86
REACTOME_HYALURONAN_METABOLISM	REACTOME_HYALURONAN_METABOLISM	REACTOME_HYALURONAN_METABOLISM	16	0.624438	1.6573	0.0116732	0.0909318	1617	tags=25%, list=8%, signal=23%	HAS3/HYAL1/HMMR/SLC9A1
REACTOME_BASIGIN_INTERACTIONS	REACTOME_BASIGIN_INTERACTIONS	REACTOME_BASIGIN_INTERACTIONS	25	0.62746	1.85348	0.00392927	0.0499737	658	tags=28%, list=3%, signal=27%	SLC16A3/ITGB1/ITGA3/ITGA6/CAV1/SLC7A5/PPIA
GHO_ATF5_TARGETS_UP	GHO_ATF5_TARGETS_UP	GHO_ATF5_TARGETS_UP	13	0.627744	1.57682	0.0372549	0.166267	1427	tags=38%, list=7%, signal=36%	NEB/RIF1/RHOBTB1/ITIH3/EIF4G2
KANG_AR_TARGETS_UP	KANG_AR_TARGETS_UP	KANG_AR_TARGETS_UP	17	0.62854	1.70063	0.0077821	0.0734106	94	tags=12%, list=0%, signal=12%	BMP1/TGFB3
DEMAGALHAES_AGING_DN	DEMAGALHAES_AGING_DN	DEMAGALHAES_AGING_DN	16	0.62948	1.67068	0.0116732	0.0909318	2066	tags=44%, list=11%, signal=39%	CX3CL1/TFRC/COL4A5/ATP5MC3/ACSS2/CA4/UQCRFS1
BIOCARTA_TOB1_PATHWAY	BIOCARTA_TOB1_PATHWAY	BIOCARTA_TOB1_PATHWAY	18	0.630053	1.71942	0.00996016	0.0839237	2822	tags=33%, list=15%, signal=28%	SMAD3/TGFB3/SMAD4/TGFBR2/TOB1/TGFBR1
REACTOME_SIGNALING_BY_ACTIVIN	REACTOME_SIGNALING_BY_ACTIVIN	REACTOME_SIGNALING_BY_ACTIVIN	12	0.63073	1.56611	0.0386847	0.17027	1932	tags=33%, list=10%, signal=30%	SMAD3/ACVR1C/SMAD4/FSTL3
AMIT_EGF_RESPONSE_60_HELA	AMIT_EGF_RESPONSE_60_HELA	AMIT_EGF_RESPONSE_60_HELA	40	0.632556	2.07822	0.0019685	0.0339177	1684	tags=40%, list=9%, signal=37%	CCND1/SLC2A3/PMAIP1/SERPINE1/KLF6/RHOB/BHLHE40/PTPN11/GPRC5A/LDLR/MBNL2/DCUN1D4/SNAI2/ZFP36L1/EXOC5/NCKAP1
BIOCARTA_CELLCYCLE_PATHWAY	BIOCARTA_CELLCYCLE_PATHWAY	BIOCARTA_CELLCYCLE_PATHWAY	23	0.633238	1.84285	0.0019685	0.0339177	528	tags=30%, list=3%, signal=30%	CCND1/CCNE1/CCND3/CDK6/TFDP1/CDKN2B/CDC25A
REACTOME_LAMININ_INTERACTIONS	REACTOME_LAMININ_INTERACTIONS	REACTOME_LAMININ_INTERACTIONS	28	0.63333	1.91935	0.00195695	0.0339177	608	tags=32%, list=3%, signal=31%	LAMA3/ITGB1/ITGA3/COL4A5/LAMC2/LAMB3/LAMA4/ITGA6/COL4A4
TRAYNOR_RETT_SYNDROM_DN	TRAYNOR_RETT_SYNDROM_DN	TRAYNOR_RETT_SYNDROM_DN	13	0.633632	1.5916	0.0294118	0.145533	1024	tags=23%, list=5%, signal=22%	RUNX1/ITGA6/PTPRF
KEGG_NON_HOMOLOGOUS_END_JOINING	KEGG_NON_HOMOLOGOUS_END_JOINING	KEGG_NON_HOMOLOGOUS_END_JOINING	11	0.636367	1.53188	0.0475248	0.188999	1197	tags=36%, list=6%, signal=34%	FEN1/MRE11/PRKDC/LIG4
VALK_AML_CLUSTER_9	VALK_AML_CLUSTER_9	VALK_AML_CLUSTER_9	32	0.636937	1.99861	0.00201613	0.0339177	3617	tags=47%, list=19%, signal=38%	NT5E/FAM171A1/MSLN/NRP1/TGFBI/MGLL/CD81/CLIP2/NDE1/ICAM4/RUNX3/CBFB/CD59/FCGR2B/VSIG4
REACTOME_CRMPS_IN_SEMA3A_SIGNALING	REACTOME_CRMPS_IN_SEMA3A_SIGNALING	REACTOME_CRMPS_IN_SEMA3A_SIGNALING	16	0.6385	1.69462	0.00583658	0.0634366	2539	tags=38%, list=13%, signal=33%	CRMP1/NRP1/CDK5R1/PLXNA2/PLXNA4/SEMA3A
PID_RANBP2_PATHWAY	PID_RANBP2_PATHWAY	PID_RANBP2_PATHWAY	11	0.639138	1.53855	0.0455446	0.185748	325	tags=18%, list=2%, signal=18%	RANGAP1/MDM2
WU_HBX_TARGETS_1_DN	WU_HBX_TARGETS_1_DN	WU_HBX_TARGETS_1_DN	21	0.639576	1.81973	0.0019685	0.0339177	1650	tags=43%, list=9%, signal=39%	CDC42BPA/KLF6/NCOA3/PDS5B/BCL2L1/RAB5C/STK25/MAP2K3/HSPA1L
REACTOME_G1_S_SPECIFIC_TRANSCRIPTION	REACTOME_G1_S_SPECIFIC_TRANSCRIPTION	REACTOME_G1_S_SPECIFIC_TRANSCRIPTION	28	0.64079	1.94195	0.00195695	0.0339177	1876	tags=32%, list=10%, signal=29%	CCNE1/TFDP1/E2F4/CDC25A/CDC6/FBXO5/RBL1/PCNA/CDK1
REACTOME_HEME_BIOSYNTHESIS	REACTOME_HEME_BIOSYNTHESIS	REACTOME_HEME_BIOSYNTHESIS	12	0.642378	1.59503	0.0367505	0.165364	1816	tags=33%, list=9%, signal=30%	ALAS2/ALAS1/FLVCR1/FECH
HEIDENBLAD_AMPLIFIED_IN_SOFT_TISSUE_CANCER	HEIDENBLAD_AMPLIFIED_IN_SOFT_TISSUE_CANCER	HEIDENBLAD_AMPLIFIED_IN_SOFT_TISSUE_CANCER	13	0.642596	1.61412	0.0254902	0.134554	325	tags=15%, list=2%, signal=15%	JUN/MDM2
JI_CARCINOGENESIS_BY_KRAS_AND_STK11_UP	JI_CARCINOGENESIS_BY_KRAS_AND_STK11_UP	JI_CARCINOGENESIS_BY_KRAS_AND_STK11_UP	11	0.64394	1.55011	0.0455446	0.185748	3057	tags=45%, list=16%, signal=38%	COL17A1/TIAM1/ADAM8/BNC1/KRT5
REACTOME_CHONDROITIN_SULFATE_BIOSYNTHESIS	REACTOME_CHONDROITIN_SULFATE_BIOSYNTHESIS	REACTOME_CHONDROITIN_SULFATE_BIOSYNTHESIS	17	0.644181	1.74296	0.00389105	0.0499737	2204	tags=35%, list=11%, signal=31%	VCAN/BGN/CSPG5/CHST11/CSPG4/CSGALNACT2
REACTOME_G0_AND_EARLY_G1	REACTOME_G0_AND_EARLY_G1	REACTOME_G0_AND_EARLY_G1	27	0.645726	1.94443	0.00194553	0.0339177	2400	tags=37%, list=12%, signal=32%	CCNE1/CCNE2/TFDP1/E2F4/CDC25A/CDC6/RBL1/PCNA/CDK1/DYRK1A
NAM_FXYD5_TARGETS_DN	NAM_FXYD5_TARGETS_DN	NAM_FXYD5_TARGETS_DN	14	0.64741	1.66836	0.0159363	0.104416	594	tags=36%, list=3%, signal=35%	FXYD5/AXL/SNRPD1/FTH1/FERMT1
BIOCARTA_SPPA_PATHWAY	BIOCARTA_SPPA_PATHWAY	BIOCARTA_SPPA_PATHWAY	14	0.648924	1.67226	0.0159363	0.104416	2481	tags=36%, list=13%, signal=31%	ITGB1/MAPK1/MAP2K1/PLCB1/PRKCB
BAKER_HEMATOPOIESIS_STAT3_TARGETS	BAKER_HEMATOPOIESIS_STAT3_TARGETS	BAKER_HEMATOPOIESIS_STAT3_TARGETS	14	0.650724	1.6769	0.0159363	0.104416	510	tags=29%, list=3%, signal=28%	CCND1/CCND3/HIF1A/FAS
SIMBULAN_PARP1_TARGETS_UP	SIMBULAN_PARP1_TARGETS_UP	SIMBULAN_PARP1_TARGETS_UP	27	0.650816	1.95976	0.00194553	0.0339177	2386	tags=44%, list=12%, signal=39%	CCND1/IGFBP6/TIMP2/MDM2/COL4A5/S100A6/CAV1/SERPINE2/MGP/TINAGL1/CD81/APP
GREENBAUM_E2A_TARGETS_DN	GREENBAUM_E2A_TARGETS_DN	GREENBAUM_E2A_TARGETS_DN	17	0.652013	1.76415	0.00194553	0.0339177	1288	tags=24%, list=7%, signal=22%	EMP1/CYFIP2/EVL/SERINC3
[truncated: 61 more rows]

## Sheet: H_siNEG 05%O2 vs siNEG 20%O2
Table SIII
Title: Functional Enriched Categories
[truncated: 7 more rows]

## Sheet: H_siTRAP1 05%O2 vs. siNEG 05%O2
Table SIII. Continued.
[truncated: 3 more rows]
